# Supplementary material for: Repertoire of Abs primed by bacteria in gnotobiotic mice
Source: PubMed Central journal article supplement — Innate Immun. 2018 Mar 16;24(3):180–7. doi: 10.1177/1753425918763524 (PMC6852387; doi:10.1177/1753425918763524), 2018-03-16
Supplement: Supplementary_table1.pdf [file Supplementary_table1.pdf]

| Supplementary Table 1. Mouse ID in groups of animals used in the experiments. |                                                                                                                                                                               |
|-------------------------------------------------------------------------------|-------------------------------------------------------------------------------------------------------------------------------------------------------------------------------|
| Mouse ID                                                                      | Group                                                                                                                                                                         |
| 1.1                                                                           | sterile conditions were kept                                                                                                                                                  |
| 1.2                                                                           |                                                                                                                                                                               |
| 1.3                                                                           |                                                                                                                                                                               |
| 1.4                                                                           |                                                                                                                                                                               |
| 2.1                                                                           | contact to <i>Escherichia coli</i> strain W3110                                                                                                                               |
| 2.2                                                                           |                                                                                                                                                                               |
| 2.3                                                                           |                                                                                                                                                                               |
| 2.4                                                                           |                                                                                                                                                                               |
| 3.1                                                                           | contact to <i>Bifidobacterium longum</i> strain NCC2705                                                                                                                       |
| 3.2                                                                           |                                                                                                                                                                               |
| 3.3                                                                           |                                                                                                                                                                               |
| 3.4                                                                           |                                                                                                                                                                               |
| 4.1                                                                           | contact to <i>Bacteroides thetaiotaomicron</i> strain VPI-5482 (ATCC 29148)                                                                                                   |
| 4.2                                                                           |                                                                                                                                                                               |
| 4.3                                                                           |                                                                                                                                                                               |
| 4.4                                                                           |                                                                                                                                                                               |
| 5.1                                                                           | contact to <i>Lactobacillus reuteri</i> strain SD2112 (ATCC 55730)                                                                                                            |
| 5.2                                                                           |                                                                                                                                                                               |
| 5.3                                                                           |                                                                                                                                                                               |
| 5.4                                                                           |                                                                                                                                                                               |
| 6.1                                                                           | contact to 4 strains of bacteria ( <i>E. coli</i> strain W3110, <i>B. longum</i> strain NCC2705, <i>B. thetaiotaomicron</i> strain VPI-5482, <i>L. reuteri</i> strain SD2112) |
| 6.2                                                                           |                                                                                                                                                                               |
| 6.3                                                                           |                                                                                                                                                                               |
| 6.4                                                                           |                                                                                                                                                                               |
| 7.1                                                                           | transfer to normal diet (standard granulated food)                                                                                                                            |
| 7.2                                                                           |                                                                                                                                                                               |
| 7.3                                                                           |                                                                                                                                                                               |
| 7.4                                                                           |                                                                                                                                                                               |
| 8.1                                                                           | gavage orally of a sample of non-sterile mice feces                                                                                                                           |
| 8.2                                                                           |                                                                                                                                                                               |
| 8.3                                                                           |                                                                                                                                                                               |
| 8.4                                                                           |                                                                                                                                                                               |
| 9.1                                                                           | conventional controls, CD1 male mice fed with standard granulated food                                                                                                        |
| 9.2                                                                           |                                                                                                                                                                               |
| 9.3                                                                           |                                                                                                                                                                               |
| 9.4                                                                           |                                                                                                                                                                               |
