# Supplementary material for: Repertoire of Abs primed by bacteria in gnotobiotic mice
Source: PubMed Central journal article supplement — Innate Immun. 2018 Mar 16;24(3):180–7. doi: 10.1177/1753425918763524 (PMC6852387; doi:10.1177/1753425918763524), 2018-03-16
Supplement: Supplementary_table2.pdf [file Supplementary_table2.pdf]

This Table represents all glycans (oligo- and polysaccharides) printed on microarrays used in this work and also fluorescent signals (0-65535 RFU, relative fluorescent units) for each animal. Median - is median of 6-8 replicates of particular glycan; Q1 and Q3 - 25%- and 75% quartiles as a measure of deviation. All "positive" signals marked with red colour; measure of "positivity" is a signal that is 5 times greater than the background value, which was not higher than 300 RFU. Measurement of 5-time greater background values is our conventional practice.

| <b>Nr<br/>(CarbLab)</b> | <b>Structure</b>                                                      | <b>Short Name</b> |
|-------------------------|-----------------------------------------------------------------------|-------------------|
| 001                     | <b>Fuc<math>\alpha</math>-sp3</b>                                     | aF                |
| 002                     | <b>Gal<math>\alpha</math>-sp3</b>                                     | aA                |
| 003                     | <b>Gal<math>\beta</math>-sp3</b>                                      | bA                |
| 004                     | <b>GalNAc<math>\alpha</math>1-OSer</b>                                | TnSer             |
| 005                     | <b>GalNAc<math>\alpha</math>-sp3</b>                                  | Tn                |
| 006                     | <b>GalNAc<math>\beta</math>-sp3</b>                                   | bAN               |
| 007                     | <b>Glc<math>\alpha</math>-sp3</b>                                     | aG                |
| 009                     | <b>Glc<math>\beta</math>-sp3</b>                                      | bG                |
| 010                     | <b>GlcNAc<math>\beta</math>-sp3</b>                                   | GN                |
| 011                     | <b>GlcNAc<math>\beta</math>-sp2</b>                                   | GN-C2             |
| 012                     | <b>GlcNAc<math>\beta</math>-sp7</b>                                   | GN-Ph             |
| 013                     | <b>GlcNAc<math>\beta</math>-sp8</b>                                   | GN-PEG            |
| 014                     | <b>GlcN(Gc)<math>\beta</math>-sp4</b>                                 | bGN(Gc)           |
| 015                     | <b>HOCH<sub>2</sub>(HOCH)<sub>4</sub>CH<sub>2</sub>NH<sub>2</sub></b> | glucitol          |
| 016                     | <b>Man<math>\alpha</math>-sp3</b>                                     | aM                |
| 017                     | <b>Man<math>\alpha</math>-sp4</b>                                     | aM-Gly            |
| 018                     | <b>Man<math>\beta</math>-sp4</b>                                      | bM                |
| 019                     | <b>ManNAc<math>\beta</math>-sp4</b>                                   | bMN               |
| 020                     | <b>Rha<math>\alpha</math>-sp3</b>                                     | aR                |
| 021                     | <b>Gal<math>\beta</math>-sp4</b>                                      | bA-Gly            |
| 022                     | <b>GlcNAc<math>\beta</math>-sp4</b>                                   | GN-Gly            |

|     |                                                                |                         |
|-----|----------------------------------------------------------------|-------------------------|
| 023 | <b>GalNAc<math>\beta</math>-sp4</b>                            | bAN-Gly                 |
| 024 | <b>GlcNAc<math>\alpha</math>-sp3</b>                           | GNa                     |
| 025 | <b>GalNAc<math>\beta</math>-sp10</b>                           | bAN-PEG2                |
| 026 | <b>Rha<math>\beta</math>-sp4</b>                               | bR                      |
| 027 | <b>3,6-O-Me<sub>2</sub>-Glc<math>\beta</math>-sp3</b>          | 3,6-Me <sub>2</sub> Glc |
| 037 | <b>3-O-Su-Gal<math>\beta</math>-sp3</b>                        | bA3Su                   |
| 038 | <b>3-O-Su-GalNAc<math>\beta</math>-sp3</b>                     | bAN3Su                  |
| 043 | <b>6-O-Su-GlcNAc<math>\beta</math>-sp3</b>                     | GN6Su                   |
| 044 | <b>GlcA<math>\alpha</math>-sp3</b>                             | aGU                     |
| 045 | <b>GlcA<math>\beta</math>-sp3</b>                              | bGU                     |
| 046 | <b>6-H<sub>2</sub>PO<sub>3</sub>Glc<math>\beta</math>-sp4</b>  | G6P                     |
| 047 | <b>6-H<sub>2</sub>PO<sub>3</sub>Man<math>\alpha</math>-sp3</b> | M6P                     |
| 048 | <b>Neu5Ac<math>\alpha</math>-sp3</b>                           | Sia                     |
| 049 | <b>Neu5Ac<math>\alpha</math>-sp9</b>                           | Sia-Bn                  |
| 050 | <b>Neu5Ac<math>\beta</math>-sp3</b>                            | bSia                    |
| 051 | <b>Neu5Ac<math>\beta</math>-sp9</b>                            | bSia-Bn                 |
| 052 | <b>Neu5Gc<math>\alpha</math>-sp3</b>                           | aNeu5Gc                 |
| 053 | <b>Neu5Gc<math>\beta</math>-sp3</b>                            | bSia5Gc                 |
| 054 | <b>9-NAc-Neu5Ac<math>\alpha</math>-sp3</b>                     | 9NAcSia                 |
| 055 | <b>3-O-Su-GlcNAc<math>\beta</math>-sp3</b>                     | GN3Su                   |
| 071 | <b>Fuc<math>\alpha</math>1-2Gal<math>\beta</math>-sp3</b>      | Hdi                     |
| 072 | <b>Fuc<math>\alpha</math>1-3GlcNAc<math>\beta</math>-sp3</b>   | Fa3GN                   |
| 073 | <b>Fuc<math>\alpha</math>1-4GlcNAc<math>\beta</math>-sp3</b>   | Le                      |
| 074 | <b>Fuc<math>\beta</math>1-3GlcNAc<math>\beta</math>-sp3</b>    | Fb3GN                   |
| 075 | <b>Gal<math>\alpha</math>1-2Gal<math>\beta</math>-sp3</b>      | Aa2A                    |
| 076 | <b>Gal<math>\alpha</math>1-3Gal<math>\beta</math>-sp3</b>      | Bdi                     |

|     |                                                                  |          |
|-----|------------------------------------------------------------------|----------|
| 077 | <b>Gal<math>\alpha</math>1-3GalNAc<math>\beta</math>-sp3</b>     | Tab      |
| 078 | <b>Gal<math>\alpha</math>1-3GalNAc<math>\alpha</math>-sp3</b>    | Taa      |
| 080 | <b>Gal<math>\alpha</math>1-3GlcNAc<math>\beta</math>-sp3</b>     | Aa3GN    |
| 081 | <b>Gal<math>\alpha</math>1-4GlcNAc<math>\beta</math>-sp3</b>     | aLN      |
| 082 | <b>Gal<math>\alpha</math>1-4GlcNAc<math>\beta</math>-sp8</b>     | aLN-PEG  |
| 083 | <b>Gal<math>\alpha</math>1-6Glc<math>\beta</math>-sp4</b>        | Aa6G     |
| 084 | <b>Gal<math>\beta</math>1-2Gal<math>\beta</math>-sp3</b>         | Ab2A     |
| 085 | <b>Gal<math>\beta</math>1-3GlcNAc<math>\beta</math>-sp3</b>      | LeC      |
| 086 | <b>Gal<math>\beta</math>1-3GlcNAc<math>\beta</math>-sp2</b>      | LeC-C2   |
| 087 | <b>Gal<math>\beta</math>1-3Gal<math>\beta</math>-sp3</b>         | Ab3A     |
| 088 | <b>Gal<math>\beta</math>1-3GalNAc<math>\beta</math>-sp3</b>      | Tbb      |
| 089 | <b>Gal<math>\beta</math>1-3GalNAc<math>\alpha</math>-sp3</b>     | TF       |
| 092 | <b>Gal<math>\beta</math>1-4Glc<math>\beta</math>-sp2</b>         | Lac-C2   |
| 093 | <b>Gal<math>\beta</math>1-4Glc<math>\beta</math>-sp4</b>         | Lac-Gly  |
| 094 | <b>Gal<math>\beta</math>1-4Gal<math>\beta</math>-sp4</b>         | Ab4A     |
| 096 | <b>Gal<math>\beta</math>1-4GlcNAc<math>\beta</math>-sp2</b>      | LN-C2    |
| 097 | <b>Gal<math>\beta</math>1-4GlcNAc<math>\beta</math>-sp3</b>      | LN       |
| 098 | <b>Gal<math>\beta</math>1-4GlcNAc<math>\beta</math>-sp5</b>      | LN-C8    |
| 099 | <b>Gal<math>\beta</math>1-4GlcNAc<math>\beta</math>-sp8</b>      | LN-PEG   |
| 100 | <b>Gal<math>\beta</math>1-6Gal<math>\beta</math>-sp4</b>         | Ab6A     |
| 101 | <b>GalNAc<math>\alpha</math>1-3GalNAc<math>\beta</math>-sp3</b>  | Fs-2     |
| 102 | <b>GalNAc<math>\alpha</math>1-3Gal<math>\beta</math>-sp3</b>     | Adi      |
| 103 | <b>GalNAc<math>\alpha</math>1-3GalNAc<math>\alpha</math>-sp3</b> | core5    |
| 104 | <b>GalNAc<math>\beta</math>1-3Gal<math>\beta</math>-sp3</b>      | ANb3A    |
| 105 | <b>GalNAc<math>\beta</math>1-3GalNAc<math>\beta</math>-sp3</b>   | para-Fs  |
| 106 | <b>GalNAc<math>\beta</math>1-4GlcNAc<math>\beta</math>-sp3</b>   | LacdiNAc |

|     |                                                                              |             |
|-----|------------------------------------------------------------------------------|-------------|
| 107 | <b>GalNAc<math>\beta</math>1-4GlcNAc<math>\beta</math>-sp2</b>               | LacdiNAc-C2 |
| 110 | <b>Glc<math>\alpha</math>1-4Glc<math>\beta</math>-sp3</b>                    | Malt2       |
| 111 | <b>Glc<math>\beta</math>1-4Glc<math>\beta</math>-sp4</b>                     | cello       |
| 112 | <b>Glc<math>\beta</math>1-6Glc<math>\beta</math>-sp4</b>                     | gent        |
| 113 | <b>GlcNAc<math>\beta</math>1-3GalNAc<math>\alpha</math>-sp3</b>              | core3       |
| 114 | <b>GlcNAc<math>\beta</math>1-3Man<math>\beta</math>-sp4</b>                  | GN3M        |
| 115 | <b>GlcNAc<math>\beta</math>1-4GlcNAc<math>\beta</math>-Asn</b>               | Ch2-Asn     |
| 116 | <b>GlcNAc<math>\beta</math>1-4GlcNAc<math>\beta</math>-sp3</b>               | Ch2         |
| 117 | <b>GlcNAc<math>\beta</math>1-4GlcNAc<math>\beta</math>-sp4</b>               | Ch2-Gly     |
| 118 | <b>GlcNAc<math>\beta</math>1-6GalNAc<math>\alpha</math>-sp3</b>              | core6       |
| 119 | <b>Man<math>\alpha</math>1-2Man<math>\beta</math>-sp4</b>                    | Ma2Mb       |
| 120 | <b>Man<math>\alpha</math>1-3Man<math>\beta</math>-sp4</b>                    | Ma3M        |
| 121 | <b>Man<math>\alpha</math>1-4Man<math>\beta</math>-sp4</b>                    | Ma4M        |
| 122 | <b>Man<math>\alpha</math>1-6Man<math>\beta</math>-sp4</b>                    | Ma6M        |
| 123 | <b>Man<math>\beta</math>1-4GlcNAc<math>\beta</math>-sp4</b>                  | Mb4GN       |
| 125 | <b>6-Bn-Gal<math>\beta</math>1-4GlcNAc<math>\beta</math>-sp2</b>             | 6'Bn-LN     |
| 126 | <b>6-Bn-Gal<math>\alpha</math>1-4(6-Bn)GlcNAc<math>\beta</math>-sp3</b>      | Bn2-aLN     |
| 127 | <b>Gal<math>\beta</math>1-4Glc<math>\beta</math>-sp4-Phe</b>                 | Lac-Phe     |
| 128 | <b>Gal<math>\beta</math>1-4Glc<math>\beta</math>-sp4-Trp</b>                 | Lac-Trp     |
| 129 | <b>Gal<math>\beta</math>1-3(6-O-Bn)GlcNAc<math>\beta</math>-sp3</b>          | 6BnLeC      |
| 130 | <b>(6-O-Bn-Gal<math>\beta</math>1)-3GlcNAc<math>\beta</math>-sp3</b>         | 6'BnLeC     |
| 131 | <b>(6-O-Bn-Gal<math>\beta</math>1)-3(6-O-Bn)GlcNAc<math>\beta</math>-sp3</b> | Bn2LeC      |
| 132 | <b>Gal<math>\beta</math>1-3GalNAc<math>\alpha</math>-sp5</b>                 | TF-C8       |
| 133 | <b>Gal<math>\beta</math>1-4Glc<math>\beta</math>-sp4-Ala</b>                 | Lac-Ala     |
| 134 | <b>Gal<math>\beta</math>1-4Glc<math>\beta</math>-sp4-Arg</b>                 | Lac-Arg     |
| 135 | <b>Gal<math>\beta</math>1-4Glc<math>\beta</math>-sp4-Asn</b>                 | Lac-Asn     |

|     |                                                       |            |
|-----|-------------------------------------------------------|------------|
| 136 | Galβ1-4Glcβ-sp4-Ile                                   | Lac-Ile    |
| 137 | Galβ1-4Glcβ-sp4-Nle                                   | Lac-Nle    |
| 138 | Galβ1-4Glcβ-sp4-Val                                   | Lac-Val    |
| 139 | Galβ1-4GlcNAcα-sp3                                    | LNa        |
| 140 | Galα1-3GalNAc(fur)β-sp3                               | Tab(f)     |
| 142 | GlcNAcα1-3GalNAcβ-sp3                                 | GNa3AN     |
| 143 | Fucα1-2(3-O-Su)Galβ-sp3                               | Hdi3Su     |
| 144 | Galβ1-3(6-O-Su)GlcNAcβ-sp2                            | LeC6Su-C2  |
| 145 | Galβ1-3(6-O-Su)GlcNAcβ-sp3                            | LeC6Su     |
| 146 | Galβ1-4(6-O-Su)Glcβ-sp2                               | Lac6Su     |
| 149 | GlcNAcβ1-4(6-O-Su)GlcNAcβ-sp2                         | Ch2-6Su    |
| 150 | 3-O-Su-Galβ1-3GalNAcα-sp3                             | TF3'Su     |
| 151 | 6-O-Su-Galβ1-3GalNAcα-sp3                             | TF6'Su     |
| 152 | 3-O-Su-Galβ1-4Glcβ-sp2                                | Lac3'Su    |
| 153 | 6-O-Su-Galβ1-4Glcβ-sp2                                | Lac6'Su    |
| 154 | 3-O-Su-Galβ1-3GlcNAcβ-sp3                             | LeC3'Su    |
| 156 | 3-O-Su-Galβ1-4GlcNAcβ-sp2                             | LN3'Su-C2  |
| 158 | 4-O-Su-Galβ1-4GlcNAcβ-sp2                             | LN4'Su-C2  |
| 159 | 4-O-Su-Galβ1-4GlcNAcβ-sp3                             | LN4'Su     |
| 160 | 6-O-Su-Galβ1-3GlcNAcβ-sp2                             | LeC6'Su-C2 |
| 161 | 6-O-Su-Galβ1-3GlcNAcβ-sp3                             | LeC6'Su    |
| 162 | 6-O-Su-Galβ1-4GlcNAcβ-sp2                             | LN6'Su-C2  |
| 164 | GlcAβ1-3GlcNAcβ-sp3                                   | GUb3GN     |
| 165 | GlcAβ1-3Galβ-sp3                                      | GUb3A      |
| 166 | GlcAβ1-6Galβ-sp3                                      | GUb6A      |
| 167 | GlcNAcβ1-4-[HOOC(CH <sub>3</sub> )CH]-3-O-GlcNAcβ-sp4 | GN-Mur     |

|     |                                                                                          |                  |
|-----|------------------------------------------------------------------------------------------|------------------|
| 168 | <b>GlcNAc<math>\beta</math>1-4Mur-L-Ala-D-i-Gln-Lys</b>                                  | GMDPLys          |
| 169 | <b>Neu5Ac<math>\alpha</math>2-3Gal<math>\beta</math>-sp3</b>                             | GM4              |
| 170 | <b>Neu5Ac<math>\alpha</math>2-6Gal<math>\beta</math>-sp3</b>                             | Sia6A            |
| 171 | <b>Neu5Ac<math>\alpha</math>2-3GalNAc<math>\alpha</math>-sp3</b>                         | 3-SiaTn          |
| 173 | <b>Neu5Ac<math>\beta</math>2-6GalNAc<math>\alpha</math>-sp3</b>                          | bSiaTn           |
| 174 | <b>Neu5Gc<math>\alpha</math>2-6GalNAc<math>\alpha</math>-sp3</b>                         | Neu5GcTn         |
| 175 | <b>Neu5Gc<math>\beta</math>2-6GalNAc<math>\alpha</math>-sp3</b>                          | bNeu5GcTn        |
| 176 | <b>3-O-Su-Gal<math>\beta</math>1-4(6-O-Su)Glc<math>\beta</math>-sp2</b>                  | Lac3',6Su2       |
| 177 | <b>3-O-Su-Gal<math>\beta</math>1-4(6-O-Su)GlcNAc<math>\beta</math>-sp3</b>               | LN3'6Su2         |
| 178 | <b>6-O-Su-Gal<math>\beta</math>1-4(6-O-Su)Glc<math>\beta</math>-sp2</b>                  | Lac6,6'Su2       |
| 179 | <b>6-O-Su-Gal<math>\beta</math>1-3(6-O-Su)GlcNAc<math>\beta</math>-sp2</b>               | LeC6,6'Su2       |
| 180 | <b>6-O-Su-Gal<math>\beta</math>1-4(6-O-Su)GlcNAc<math>\beta</math>-sp2</b>               | LN66'Su2         |
| 181 | <b>3,4-O-Su<sub>2</sub>-Gal<math>\beta</math>1-4GlcNAc<math>\beta</math>-sp3</b>         | LN3'4'Su2        |
| 182 | <b>3,6-O-Su<sub>2</sub>-Gal<math>\beta</math>1-4GlcNAc<math>\beta</math>-sp2</b>         | LN3'6'Su2        |
| 183 | <b>4,6-O-Su<sub>2</sub>-Gal<math>\beta</math>1-4GlcNAc<math>\beta</math>-sp2</b>         | LN4'6'Su2-C2     |
| 184 | <b>4,6-O-Su<sub>2</sub>-Gal<math>\beta</math>1-4GlcNAc<math>\beta</math>-sp3</b>         | LN4'6'Su2        |
| 186 | <b>Neu5Ac<math>\alpha</math>2-8Neu5Ac<math>\alpha</math>2-sp3</b>                        | (Sia)2           |
| 187 | <b>Neu5Ac<math>\alpha</math>2-8Neu5Ac<math>\alpha</math>2-sp9</b>                        | (Sia)2Bn         |
| 188 | <b>Neu5Ac<math>\alpha</math>2-8Neu5Ac<math>\beta</math>-sp9</b>                          | (Sia)2-bBn       |
| 189 | <b>3,6-O-Su<sub>2</sub>-Gal<math>\beta</math>1-4(6-O-Su)GlcNAc<math>\beta</math>-sp2</b> | LN3'66'Su3       |
| 190 | <b>Gal<math>\beta</math>1-4-(6-P)GlcNAc<math>\beta</math>-sp2</b>                        | LN6P             |
| 191 | <b>6-P-Gal<math>\beta</math>1-4GlcNAc<math>\beta</math>-sp2</b>                          | LN6'P            |
| 192 | <b>GalNAc<math>\beta</math>1-4(6-O-Su)GlcNAc<math>\beta</math>-sp3</b>                   | LacdiNAc6Su      |
| 193 | <b>3-O-Su-GalNAc<math>\beta</math>1-4GlcNAc<math>\beta</math>-sp3</b>                    | LacdiNAc3'Su     |
| 194 | <b>6-O-Su-GalNAc<math>\beta</math>1-4GlcNAc<math>\beta</math>-sp3</b>                    | LacdiNAc6'Su     |
| 195 | <b>6-O-Su-GalNAc<math>\beta</math>1-4(3-O-Ac)GlcNAc<math>\beta</math>-sp3</b>            | 3Ac-LacdiNAc6'Su |

|     |                                                                                              |                      |
|-----|----------------------------------------------------------------------------------------------|----------------------|
| 196 | <b>3-O-Su-GalNAc<math>\beta</math>1-4(3-O-Su)GlcNAc<math>\beta</math>-sp3</b>                | LacdiNAc3,3'Su2      |
| 197 | <b>3,6-O-Su<sub>2</sub>-GalNAc<math>\beta</math>1-4GlcNAc<math>\beta</math>-sp3</b>          | LacdiNAc3',6'Su2     |
| 198 | <b>4,6-O-Su<sub>2</sub>-GalNAc<math>\beta</math>1-4GlcNAc<math>\beta</math>-sp3</b>          | LacdiNAc4',6'Su2     |
| 199 | <b>4,6-O-Su<sub>2</sub>-GalNAc<math>\beta</math>1-4-(3-O-Ac)GlcNAc<math>\beta</math>-sp3</b> | 3Ac-LacdiNAc4',6'Su2 |
| 200 | <b>4-O-Su-GalNAc<math>\beta</math>1-4GlcNAc<math>\beta</math>-sp3</b>                        | LacdiNAc4'Su         |
| 201 | <b>3,4-O-Su<sub>2</sub>-GalNAc<math>\beta</math>1-4GlcNAc<math>\beta</math>-sp3</b>          | LacdiNAc3',4'Su2     |
| 202 | <b>6-O-Su-GalNAc<math>\beta</math>1-4(6-O-Su)GlcNAc<math>\beta</math>-sp3</b>                | LacdiNAc6,6'Su2      |
| 203 | <b>Gal<math>\beta</math>1-4(6-O-Su)GlcNAc<math>\beta</math>-sp2</b>                          | LN6Su                |
| 204 | <b>4-O-Su-GalNAc<math>\beta</math>1-4GlcNAc<math>\beta</math>-sp2</b>                        | LacdiNAc4'Su-C2      |
| 205 | <b>Neu5Ac<math>\alpha</math>2-6GalNAc<math>\beta</math>-sp3</b>                              | 6SiaANb              |
| 206 | <b>Neu5Gc<math>\alpha</math>2-3Gal<math>\beta</math>-sp3</b>                                 | Neu5Gc3A             |
| 207 | <b>Neu5Ac<math>\beta</math>2-6GalNAc<math>\beta</math>-sp3</b>                               | bSiaANb              |
| 215 | <b>Fuc<math>\alpha</math>1-2Gal<math>\beta</math>1-3GlcNAc<math>\beta</math>-sp3</b>         | LeD                  |
| 216 | <b>Fuc<math>\alpha</math>1-2Gal<math>\beta</math>1-4GlcNAc<math>\beta</math>-sp3</b>         | Htype2               |
| 217 | <b>Fuc<math>\alpha</math>1-2Gal<math>\beta</math>1-3GalNAc<math>\alpha</math>-sp3</b>        | Htype3               |
| 219 | <b>Fuc<math>\alpha</math>1-2Gal<math>\beta</math>1-4Glc<math>\beta</math>-sp4</b>            | Htype6               |
| 220 | <b>Gal<math>\alpha</math>1-3Gal<math>\beta</math>1-4Glc<math>\beta</math>-sp2</b>            | Aa3'Lac-C2           |
| 221 | <b>Gal<math>\alpha</math>1-3Gal<math>\beta</math>1-4Glc<math>\beta</math>-sp4</b>            | Aa3'Lac-Gly          |
| 222 | <b>Gal<math>\alpha</math>1-3Gal<math>\beta</math>1-4GlcNAc<math>\beta</math>-sp3</b>         | Galili3              |
| 223 | <b>Gal<math>\alpha</math>1-4Gal<math>\beta</math>1-4Glc<math>\beta</math>-sp2</b>            | Pk-C2                |
| 225 | <b>Gal<math>\alpha</math>1-4Gal<math>\beta</math>1-4GlcNAc<math>\beta</math>-sp2</b>         | P1                   |
| 226 | <b>Gal<math>\alpha</math>1-3(Fuc<math>\alpha</math>1-2)Gal<math>\beta</math>-sp3</b>         | Btri                 |
| 227 | <b>Gal<math>\alpha</math>1-3(Fuc<math>\alpha</math>1-2)Gal<math>\beta</math>-sp5</b>         | Btri-C8              |
| 228 | <b>Gal<math>\beta</math>1-2Gal<math>\alpha</math>1-3GlcNAc<math>\beta</math>-sp3</b>         | Ab2Aa3GN             |
| 229 | <b>Gal<math>\beta</math>1-3Gal<math>\beta</math>1-4GlcNAc<math>\beta</math>-sp4</b>          | Ab3'LN-Gly           |
| 231 | <b>Gal<math>\beta</math>1-4GlcNAc<math>\beta</math>1-3GalNAc<math>\alpha</math>-sp3</b>      | LN3Tn                |

|     |                                                                              |             |
|-----|------------------------------------------------------------------------------|-------------|
| 232 | Galβ1-4GlcNAcβ1-6GalNAcα-sp3                                                 | LN6Tn       |
| 233 | Galβ1-3(Fuca1-4)GlcNAcβ-sp3                                                  | LeA         |
| 234 | Galβ1-4(Fuca1-3)GlcNAcβ-sp3                                                  | LeX         |
| 235 | GalNAcα1-3(Fuca1-2)Galβ-sp3                                                  | Atri        |
| 236 | GalNAcα1-3(Fuca1-2)Galβ-sp5                                                  | Atri-C8     |
| 237 | GalNHα1-3(Fuca1-2)Galβ-OCH <sub>2</sub> CH <sub>2</sub> CH <sub>2</sub> NHAc | ABtri       |
| 239 | GalNAcβ1-3(Fuca1-2)Galβ-sp3                                                  | Fa2(ANb3)A  |
| 240 | (Glcα1-4) <sub>3</sub> β-sp4                                                 | (Ga4)3b     |
| 241 | (Glcα1-6) <sub>3</sub> β-sp4                                                 | (Ga6)3b     |
| 242 | GlcNAcα1-3Galβ1-4GlcNAcβ-sp2                                                 | GNa3'LN-C2  |
| 243 | GlcNAcα1-3Galβ1-4GlcNAcβ-sp3                                                 | GNa3'LN     |
| 245 | GlcNAcα1-6Galβ1-4GlcNAcβ-sp2                                                 | GNa6'LN     |
| 246 | GlcNAcβ1-2Galβ1-3GalNAcα-sp3                                                 | GN2'TF      |
| 247 | GlcNAcβ1-3Galβ1-3GalNAcα-sp3                                                 | GN3'TF      |
| 248 | GlcNAcβ1-3Galβ1-4Glcβ-sp2                                                    | GN3'Lac     |
| 249 | GlcNAcβ1-3Galβ1-4GlcNAcβ-sp2                                                 | GN3'LN-C2   |
| 250 | GlcNAcβ1-3Galβ1-4GlcNAcβ-sp3                                                 | GN3'LN      |
| 251 | GlcNAcβ1-4Galβ1-4GlcNAcβ-sp2                                                 | GN4'LN      |
| 252 | GlcNAcβ1-4GlcNAcβ1-4GlcNAcβ-sp4                                              | Ch3         |
| 253 | GlcNAcβ1-6Galβ1-4GlcNAcβ-sp2                                                 | GN6'LN      |
| 254 | GlcNAcβ1-6(Galβ1-3)GalNAcα-sp3                                               | core2       |
| 255 | GlcNAcβ1-6(GlcNAcβ1-3)GalNAcα-sp3                                            | core4       |
| 256 | GlcNAcβ1-6(GlcNAcβ1-4)GalNAcα-sp3                                            | GN2-4,6Tn   |
| 258 | Manα1-6(Manα1-3)Manβ-sp4                                                     | (Ma)3b      |
| 259 | Galβ1-4(Galβ1-3)GlcNAcβ-sp3                                                  | (Ab)2-3,4GN |
| 260 | Galβ1-3(Fucβ1-4)GlcNAcβ-sp3                                                  | bLeA        |

|     |                                                        |                         |
|-----|--------------------------------------------------------|-------------------------|
| 261 | <b>Galβ1-4(Fucβ1-3)GlcNAcβ-sp3</b>                     | bLeX                    |
| 262 | <b>Galβ1-3GalNAcβ1-3Galβ-sp4</b>                       | Tbb-A                   |
| 263 | <b>(GalNAcβ-PEG<sub>2</sub>)<sub>3</sub>-β-Asp-Asp</b> | ANb-cluster             |
| 264 | <b>Galβ1-4Galβ1-4GlcNAcβ-sp3</b>                       | Ab4'LN                  |
| 266 | <b>Galα1-4Galβ1-4GlcNAcβ-sp3</b>                       | P1                      |
| 267 | <b>GlcNAcβ1-3Galβ1-3GlcNAcβ-sp3</b>                    | GlcNAc3'Le <sup>c</sup> |
| 268 | <b>GlcNAcβ1-4(Fuca1-6)GlcNAcβ-sp3</b>                  | Fa6Ch2                  |
| 287 | <b>3-O-Su-Galβ1-3(Fuca1-4)GlcNAcβ-sp3</b>              | 3'SuLeA                 |
| 288 | <b>3-O-Su-Galβ1-4(Fuca1-3)GlcNAcβ-sp3</b>              | 3'SuLeX                 |
| 289 | <b>Neu5Acα2-6(Galβ1-3)GalNAcα-sp3</b>                  | 6SiaTF                  |
| 290 | <b>Neu5Acα2-6(Galα1-3)GalNAcα-sp3</b>                  | A3a(Sia)Tn              |
| 291 | <b>Neu5Acβ2-6(Galβ1-3)GalNAcα-sp3</b>                  | b6SiaTF                 |
| 292 | <b>Neu5Acα2-3Galβ1-3GalNAcα-sp3</b>                    | Sia3'TF                 |
| 293 | <b>Neu5Acα2-3Galβ1-4Glcβ-sp3</b>                       | 3'SL                    |
| 294 | <b>Neu5Acα2-3Galβ1-4Glcβ-sp4</b>                       | 3'SL-Gly                |
| 295 | <b>Neu5Acα2-6Galβ1-4Glcβ-sp2</b>                       | 6'SL-C2                 |
| 296 | <b>Neu5Acα2-6Galβ1-4Glcβ-sp4</b>                       | 6'SL-Gly                |
| 297 | <b>Neu5Acβ2-6Galβ1-4Glcβ-sp2</b>                       | b6'SL                   |
| 298 | <b>Neu5Acα2-3Galβ1-4GlcNAcβ-sp3</b>                    | 3'SLN                   |
| 299 | <b>Neu5Acα2-3Galβ1-3GlcNAcβ-sp3</b>                    | 3'SiaLeC                |
| 300 | <b>Neu5Acα2-6Galβ1-4GlcNAcβ-sp3</b>                    | 6'SLN                   |
| 302 | <b>Neu5Acβ2-6Galβ1-4GlcNAcβ-sp3</b>                    | b6'SLN                  |
| 303 | <b>Neu5Gcα2-3Galβ1-4GlcNAcβ-sp3</b>                    | 3'SLN(Gc)               |
| 304 | <b>Neu5Gcα2-6Galβ1-4GlcNAcβ-sp3</b>                    | 6'SLN(Gc)               |
| 305 | <b>Neu5Gcβ2-6Galβ1-4GlcNAcβ-sp3</b>                    | b6'SLN(Gc)              |
| 306 | <b>9-NAc-Neu5Acα2-6Galβ1-4GlcNAcβ-sp3</b>              | 9NAc-6'SLN              |

|     |                                                                                                                                                                                                            |                 |
|-----|------------------------------------------------------------------------------------------------------------------------------------------------------------------------------------------------------------|-----------------|
| 307 | <b>KDN<math>\alpha</math>2-3Gal<math>\beta</math>1-3GlcNAc<math>\beta</math>-sp2</b>                                                                                                                       | KDN3LeC         |
| 308 | <b>KDN<math>\alpha</math>2-3Gal<math>\beta</math>1-4GlcNAc<math>\beta</math>-sp2</b>                                                                                                                       | KDN3LN          |
| 309 | <b>Neu5Ac<math>\alpha</math>2-6(Neu5Ac<math>\alpha</math>2-3)GalNAc<math>\alpha</math>-sp3</b>                                                                                                             | Sia2-3,6Tn      |
| 310 | <b>Neu5Ac<math>\alpha</math>2-3Gal<math>\beta</math>1-4GlcNAc<math>\beta</math>-O(CH<sub>2</sub>)<sub>3</sub>NH-amide-Neu5Ac<math>\alpha</math>2-3Gal<math>\beta</math>1-4GlcNAc<math>\beta</math>-sp3</b> | (3'SLN)2        |
| 315 | <b>Neu5Ac<math>\alpha</math>2-3Gal<math>\beta</math>1-4-(6-O-Su)GlcNAc<math>\beta</math>-sp3</b>                                                                                                           | 3'SLN6Su        |
| 318 | <b>Neu5Ac<math>\alpha</math>2-6Gal<math>\beta</math>1-4(6-O-Su)GlcNAc<math>\beta</math>-sp3</b>                                                                                                            | 6'SLN6Su        |
| 319 | <b>Neu5Ac<math>\alpha</math>2-3(6-O-Su)Gal<math>\beta</math>1-4GlcNAc<math>\beta</math>-sp3</b>                                                                                                            | 3'SLN6'Su       |
| 320 | <b>4-O-Su-Neu5Ac<math>\alpha</math>2-3(6-O-Su)Gal<math>\beta</math>1-4GlcNAc<math>\beta</math>-sp3</b>                                                                                                     | 3'SLN6',4''Su2  |
| 321 | <b>(Neu5Ac<math>\alpha</math>2-8)<sub>3</sub>-sp3</b>                                                                                                                                                      | (Sia)3          |
| 322 | <b>(Neu5Ac<math>\alpha</math>2-8)<sub>3</sub><math>\beta</math>-sp3</b>                                                                                                                                    | (Sia)3b         |
| 323 | <b>Neu5Ac<math>\alpha</math>2-6Gal<math>\beta</math>1-3GlcNAc<math>\beta</math>-sp3</b>                                                                                                                    | 6'SiaLeC        |
| 324 | <b>Neu5Ac<math>\alpha</math>2-6Gal<math>\beta</math>1-3(6-O-Su)GlcNAc<math>\beta</math>-sp3</b>                                                                                                            | 6'SiaLeC6Su     |
| 325 | <b>Neu5Ac<math>\alpha</math>2-3Gal<math>\beta</math>1-4Glc<math>\beta</math>-sp4-Ala</b>                                                                                                                   | 3'SL-Ala        |
| 326 | <b>Neu5Ac<math>\alpha</math>2-3Gal<math>\beta</math>1-4Glc<math>\beta</math>-sp4-Ile</b>                                                                                                                   | 3'SL-Ile        |
| 327 | <b>Neu5Ac<math>\alpha</math>2-3Gal<math>\beta</math>1-4Glc<math>\beta</math>-sp4-Nle</b>                                                                                                                   | 3'SL-Nle        |
| 328 | <b>Neu5Ac<math>\alpha</math>2-3Gal<math>\beta</math>1-4Glc<math>\beta</math>-sp4-Phe</b>                                                                                                                   | 3'SL-Phe        |
| 329 | <b>Neu5Ac<math>\alpha</math>2-3Gal<math>\beta</math>1-4Glc<math>\beta</math>-sp4-Trp</b>                                                                                                                   | 3'SL-Trp        |
| 330 | <b>Neu5Ac<math>\alpha</math>2-3Gal<math>\beta</math>1-4Glc<math>\beta</math>-sp4-Val</b>                                                                                                                   | 3'SL-Val        |
| 331 | <b>Neu5Gc<math>\alpha</math>2-3Gal<math>\beta</math>1-3GlcNAc<math>\beta</math>-sp3</b>                                                                                                                    | 3'SiaLeC(Gc)    |
| 332 | <b>Neu5Ac<math>\alpha</math>2-3Gal<math>\beta</math>1-4Glc<math>\beta</math>-sp4-Asn</b>                                                                                                                   | 3'SL-Asn        |
| 333 | <b>Neu5Gc<math>\alpha</math>2-3Gal<math>\beta</math>1-3(6-O-Su)GlcNAc<math>\beta</math>-sp3</b>                                                                                                            | 3'SiaLeC(Gc)6Su |
| 334 | <b>Neu5Gc<math>\alpha</math>2-3Gal<math>\beta</math>1-4(6-O-Su)GlcNAc<math>\beta</math>-sp3</b>                                                                                                            | 3'SLN(Gc)6Su    |
| 335 | <b>Neu5Ac<math>\alpha</math>2-3Gal<math>\beta</math>1-3(6-O-Su)GlcNAc<math>\beta</math>-sp3</b>                                                                                                            | 3'SiaLeC6Su     |
| 359 | <b>Gal<math>\alpha</math>1-3(Fuc<math>\alpha</math>1-2)Gal<math>\beta</math>1-3GlcNAc<math>\beta</math>-sp3</b>                                                                                            | Btype1          |
| 360 | <b>Gal<math>\alpha</math>1-3(Fuc<math>\alpha</math>1-2)Gal<math>\beta</math>1-4GlcNAc<math>\beta</math>-sp3</b>                                                                                            | Btype2          |
| 361 | <b>Gal<math>\alpha</math>1-3(Fuc<math>\alpha</math>1-2)Gal<math>\beta</math>1-4GlcNAc<math>\beta</math>-sp2</b>                                                                                            | Btype2-C2       |

|     |                                                                         |               |
|-----|-------------------------------------------------------------------------|---------------|
| 362 | Gal $\alpha$ 1-3(Fuc $\alpha$ 1-2)Gal $\beta$ 1-3GalNAc $\alpha$ -sp3   | Btype3        |
| 363 | Gal $\alpha$ 1-3(Fuc $\alpha$ 1-2)Gal $\beta$ 1-3GalNAc $\beta$ -sp3    | Btype4        |
| 364 | Gal $\alpha$ 1-3Gal $\beta$ 1-4(Fuc $\alpha$ 1-3)GlcNAc $\beta$ -sp3    | aGalLeX       |
| 365 | Gal $\alpha$ 1-4(Fuc $\alpha$ 1-2)Gal $\beta$ 1-4GlcNAc $\beta$ -sp3    | Aa4'(Fa2')LN  |
| 366 | GalNAc $\alpha$ 1-3(Fuc $\alpha$ 1-2)Gal $\beta$ 1-3GlcNAc $\beta$ -sp3 | Atype1        |
| 368 | GalNAc $\alpha$ 1-3(Fuc $\alpha$ 1-2)Gal $\beta$ 1-4GlcNAc $\beta$ -sp3 | Atype2        |
| 369 | GalNAc $\alpha$ 1-4(Fuc $\alpha$ 1-2)Gal $\beta$ 1-4GlcNAc $\beta$ -sp3 | ANa4'(Fa2')LN |
| 371 | Fuc $\alpha$ 1-2Gal $\beta$ 1-3(Fuc $\alpha$ 1-4)GlcNAc $\beta$ -sp3    | LeB           |
| 372 | Fuc $\alpha$ 1-2Gal $\beta$ 1-4(Fuc $\alpha$ 1-3)GlcNAc $\beta$ -sp3    | LeY           |
| 373 | Gal $\alpha$ 1-3Gal $\beta$ 1-4GlcNAc $\beta$ 1-3Gal $\beta$ -sp3       | Galili4       |
| 374 | Gal $\alpha$ 1-3(Gal $\alpha$ 1-4)Gal $\beta$ 1-4GlcNAc $\beta$ -sp3    | Aa2-3',4'LN   |
| 375 | Gal $\alpha$ 1-4GlcNAc $\beta$ 1-3Gal $\beta$ 1-4GlcNAc $\beta$ -sp3    | aLN3'LN       |
| 376 | Gal $\beta$ 1-3GlcNAc $\beta$ 1-3Gal $\beta$ 1-4Glc $\beta$ -sp4        | LNT           |
| 377 | Gal $\beta$ 1-3GlcNAc $\beta$ 1-3Gal $\beta$ 1-3GlcNAc $\beta$ -sp2     | LeCb3'LeC     |
| 378 | Gal $\beta$ 1-3GlcNAc $\alpha$ 1-3Gal $\beta$ 1-4GlcNAc $\beta$ -sp3    | LeCa3'LN      |
| 379 | Gal $\beta$ 1-3GlcNAc $\beta$ 1-3Gal $\beta$ 1-4GlcNAc $\beta$ -sp3     | LeC3'LN       |
| 380 | Gal $\beta$ 1-3GlcNAc $\alpha$ 1-6Gal $\beta$ 1-4GlcNAc $\beta$ -sp2    | LeCa6'LN      |
| 381 | Gal $\beta$ 1-3GlcNAc $\beta$ 1-6Gal $\beta$ 1-4GlcNAc $\beta$ -sp2     | LeC6'LN       |
| 382 | Gal $\beta$ 1-3GalNAc $\beta$ 1-4Gal $\beta$ 1-4Glc $\beta$ -sp3        | aGM1          |
| 383 | Gal $\beta$ 1-4GlcNAc $\beta$ 1-3Gal $\beta$ 1-4Glc $\beta$ -sp4        | LNnT          |
| 384 | Gal $\beta$ 1-4GlcNAc $\beta$ 1-3Gal $\beta$ 1-4GlcNAc $\beta$ -sp2     | LN3'LN-C2     |
| 386 | Gal $\beta$ 1-4GlcNAc $\alpha$ 1-6Gal $\beta$ 1-4GlcNAc $\beta$ -sp2    | LNa6'LN       |
| 387 | Gal $\beta$ 1-4GlcNAc $\beta$ 1-6Gal $\beta$ 1-4GlcNAc $\beta$ -sp2     | LN6'LN        |
| 388 | Gal $\beta$ 1-4GlcNAc $\beta$ 1-6(Gal $\beta$ 1-3)GalNAc $\alpha$ -sp3  | LN6TF         |
| 389 | GalNAc $\beta$ 1-3Gal $\alpha$ 1-4Gal $\beta$ 1-4Glc $\beta$ -sp3       | Gb4           |
| 390 | (Glc $\alpha$ 1-4) $_4\beta$ -sp4                                       | (Ga4)4b       |

|     |                                                                                        |                                   |
|-----|----------------------------------------------------------------------------------------|-----------------------------------|
| 392 | GalNAc $\alpha$ 1-3(Fuc $\alpha$ 1-2)Gal $\beta$ 1-3GalNAc $\alpha$ -sp3               | A(type 3)                         |
| 394 | GlcNAc $\beta$ 1-4(GlcNAc $\beta$ 1-3)Gal $\beta$ 1-4GlcNAc $\beta$ -sp2               | GN2-3',4'LN                       |
| 395 | GlcNAc $\beta$ 1-6(GlcNAc $\beta$ 1-3)Gal $\beta$ 1-4GlcNAc $\beta$ -sp2               | Tk                                |
| 396 | (GlcNAc $\beta$ 1) <sub>3</sub> -3,4,6-GalNAc $\alpha$ -sp3                            | GN3-3,4,6Tn                       |
| 397 | Gal $\beta$ 1-3GlcN(Fm) $\beta$ 1-3Gal $\beta$ 1-4GlcNAc $\beta$ -sp3                  | LeC(Fm)b3'LN                      |
| 398 | Gal $\beta$ 1-3GlcN(Fm) $\beta$ 1-3Gal $\beta$ 1-3GlcNAc $\beta$ -sp3                  | LeC(Fm)3'LeC                      |
| 399 | Gal $\beta$ 1-3GlcNAc $\alpha$ 1-3Gal $\beta$ 1-3GlcNAc $\beta$ -sp2                   | LeCa3'LeC-C2                      |
| 401 | Gal $\beta$ 1-3GlcNAc $\beta$ 1-3Gal $\beta$ 1-3GlcNAc $\beta$ -sp3                    | Le <sup>C</sup> 3'Le <sup>C</sup> |
| 402 | GalNAc $\alpha$ 1-3(Fuc $\alpha$ 1-2)Gal $\alpha$ 1-4GlcNAc $\beta$ -sp3               | Atria4GN                          |
| 403 | Gal $\beta$ 1-3GlcNAc $\beta$ 1-3Gal $\beta$ 1-4GlcNAc $\beta$ -sp2                    | LeC3'LN                           |
| 419 | 3-O-SuGal $\beta$ 1-4GlcNAc $\beta$ 1-3Gal $\beta$ 1-4GlcNAc $\beta$ -sp3              | (3'SuLN)3'LN                      |
| 420 | 4-O-SuGal $\beta$ 1-4GlcNAc $\beta$ 1-3Gal $\beta$ 1-4GlcNAc $\beta$ -sp3              | (4'SuLN)3'LN                      |
| 423 | Neu5Ac $\alpha$ 2-3Gal $\beta$ 1-4(Fuc $\alpha$ 1-3)GlcNAc $\beta$ -sp3                | SiaLeX                            |
| 425 | Neu5Ac $\alpha$ 2-3Gal $\beta$ 1-4(Fuc $\beta$ 1-3)GlcNAc $\beta$ -sp3                 | bF-SiaLeX                         |
| 426 | Neu5Ac $\alpha$ 2-3Gal $\beta$ 1-3(Fuc $\alpha$ 1-4)GlcNAc $\beta$ -sp3                | SiaLeA                            |
| 428 | Neu5Ac $\alpha$ 2-3Gal $\beta$ 1-4(Fuc $\alpha$ 1-3)(6-O-Su)GlcNAc $\beta$ -sp3        | SiaLeX6Su                         |
| 429 | Neu5Ac $\alpha$ 2-3(6-O-Su)Gal $\beta$ 1-4(Fuc $\alpha$ 1-3)GlcNAc $\beta$ -sp3        | SiaLeX6'Su                        |
| 431 | Neu5Ac $\alpha$ 2-3Gal $\beta$ 1-4(2-O-Su-Fuc $\alpha$ 1-3)GlcNAc $\beta$ -sp3         | SiaLeX2''Su                       |
| 432 | Neu5Ac $\alpha$ 2-3Gal $\beta$ 1-4(3-O-Su-Fuc $\alpha$ 1-3)GlcNAc $\beta$ -sp3         | SiaLeX3'''Su                      |
| 433 | Neu5Ac $\alpha$ 2-6(Neu5Ac $\alpha$ 2-3Gal $\beta$ 1-3)GalNAc $\alpha$ -sp3            | Sia2-3',6TF                       |
| 434 | Neu5Ac $\alpha$ 2-8Neu5Ac $\alpha$ 2-3Gal $\beta$ 1-4Glc $\beta$ -sp4                  | GD3                               |
| 435 | Neu5Ac $\alpha$ 2-3Gal $\beta$ 1-4(2-O-Su-Fuc $\alpha$ 1-3)(6-O-Su)GlcNAc $\beta$ -sp3 | SiaLeX6,2''Su2                    |
| 436 | 4-O-Su-Neu5Ac $\alpha$ 2-3Gal $\beta$ 1-4(Fuc $\alpha$ 1-3)(6-O-Su)GlcNAc $\beta$ -sp3 | SiaLeX6,4''Su2                    |
| 437 | GalNAc $\alpha$ 1-3(Fuc $\alpha$ 1-2)Gal $\beta$ 1-3GalNAc $\beta$ -sp3                | A(type 4)                         |
| 479 | Fuc $\alpha$ 1-2Gal $\beta$ 1-3GlcNAc $\beta$ 1-3Gal $\beta$ 1-4Glc $\beta$ -sp4       | Htype1Lac                         |
| 480 | Fuc $\alpha$ 1-2Gal $\beta$ 1-3GlcNAc $\beta$ 1-3Gal $\beta$ 1-4GlcNAc $\beta$ -sp2    | Htype1LN                          |

|     |                                                                                                                                                                    |                |
|-----|--------------------------------------------------------------------------------------------------------------------------------------------------------------------|----------------|
| 481 | Gal $\alpha$ 1-3Gal $\beta$ 1-4GlcNAc $\beta$ 1-3Gal $\beta$ 1-4Glc $\beta$ -sp4                                                                                   | Galili5        |
| 483 | Gal $\alpha$ 1-3(Fuca $\alpha$ 1-2)Gal $\beta$ 1-4(Fuca $\alpha$ 1-3)GlcNAc $\beta$ -sp3                                                                           | BLeY           |
| 492 | (Glc $\alpha$ 1-6) $_5\beta$ -sp4                                                                                                                                  | (Ga6)5b        |
| 493 | (GlcNAc $\beta$ 1-4) $_5\beta$ -sp4                                                                                                                                | Ch5            |
| 495 | Man $\alpha$ 1-6(Man $\alpha$ 1-3)Man $\alpha$ 1-6(Man $\alpha$ 1-3)Man $\beta$ -sp4                                                                               | (Ma)5b         |
| 496 | Fuca $\alpha$ 1-2Gal $\beta$ 1-3(Fuca1-4)GlcNAc $\beta$ 1-3Gal $\beta$ 1-4Glc $\beta$ -sp4                                                                         | LeBLac         |
| 497 | Fuca $\alpha$ 1-2Gal $\beta$ 1-4(Fuca $\alpha$ 1-3)GlcNAc $\beta$ 1-3Gal $\beta$ 1-4Glc $\beta$ -sp4                                                               | LeYLac         |
| 498 | Gal $\beta$ 1-4GlcNAc $\beta$ 1-3Gal $\beta$ 1-4GlcNAc $\beta$ 1-3Gal $\beta$ 1-4GlcNAc $\beta$ -sp3                                                               | (LNb3')3       |
| 499 | Gal $\beta$ 1-4GlcNAc $\beta$ 1-6(Gal $\beta$ 1-4GlcNAc $\beta$ 1-3)Gal $\beta$ 1-4GlcNAc $\beta$ -sp2                                                             | LN2-3',6'LN    |
| 501 | Gal $\beta$ 1-3GalNAc $\beta$ 1-3Gal $\alpha$ 1-4Gal $\beta$ 1-4Glc $\beta$ -sp4                                                                                   | Gb5            |
| 502 | (Glc $\alpha$ 1-6) $_6\beta$ -sp4                                                                                                                                  | (Ga6)6b        |
| 503 | (GlcNAc $\beta$ 1-4) $_6$ -sp4                                                                                                                                     | Ch6            |
| 504 | (A $\beta$ 1-4GN $\beta$ 1-2M $\alpha$ 1) $_2$ -3,6-M $\beta$ 1-4GN $\beta$ 1-4GN $\beta$ -sp4                                                                     | 9-OS           |
| 505 | (GN $\beta$ 1-2M $\alpha$ 1) $_2$ -3,6-M $\beta$ 1-4GN $\beta$ 1-4GN $\beta$ -sp4                                                                                  | 7-OS           |
| 506 | Araf $\beta$ 1-2Araf $\alpha$ 1-5(Araf $\beta$ 1-2Araf $\alpha$ 1-3) Araf $\alpha$ 1-5Araf $\alpha$ -O(CH $_2$ ) $_2$ NHCOCH $_2$ (OCH $_2$ CH $_2$ ) $_6$ NH $_2$ | Araf6          |
| 527 | Neu5Ac $\alpha$ 2-3Gal $\beta$ 1-4GlcNAc $\beta$ 1-3Gal $\beta$ 1-4GlcNAc $\beta$ -sp2                                                                             | 3'SLN-LN       |
| 528 | Neu5Ac $\alpha$ 2-3Gal $\beta$ 1-4(Fuca $\alpha$ 1-3)GlcNAc $\beta$ 1-3Gal $\beta$ -sp3                                                                            | SiaLeX3A       |
| 529 | Neu5Ac $\alpha$ 2-6(Gal $\beta$ 1-3)GlcNAc $\beta$ 1-3Gal $\beta$ 1-4Glc $\beta$ -sp4                                                                              | LSTb           |
| 530 | (Neu5Ac $\alpha$ 2-3Gal $\beta$ 1) $_2$ -3,4-GlcNAc $\beta$ -sp3                                                                                                   | (Sia3A)2-3,4GN |
| 531 | Neu5Ac $\alpha$ 2-8Neu5Ac $\alpha$ 2-3(GalNAc $\beta$ 1-4)Gal $\beta$ 1-4Glc $\beta$ -sp2                                                                          | GD2            |
| 534 | Neu5Ac $\alpha$ 2-6Gal $\beta$ 1-4GlcNAc $\beta$ 1-3Gal $\beta$ 1-4GlcNAc $\beta$ -sp3                                                                             | 6'SLN-LN       |
| 535 | Neu5Ac $\alpha$ 2-8Neu5Ac $\alpha$ 2-3(GalNAc $\beta$ 1-4)Gal $\beta$ 1-4Glc $\beta$ -sp4                                                                          | GD2-Gly        |
| 536 | Neu5Ac $\alpha$ 2-3Gal $\beta$ 1-3GlcNAc $\beta$ 1-3Gal $\beta$ 1-4Glc $\beta$ -sp4                                                                                | LSTa           |
| 537 | Neu5Ac $\alpha$ 2-3Gal $\beta$ 1-4GlcNAc $\beta$ 1-3Gal $\beta$ 1-4Glc $\beta$ -sp4                                                                                | LSTd           |
| 538 | Gal $\beta$ 1-4(Fuca $\alpha$ 1-3)GlcNAc $\beta$ 1-6(Gal $\beta$ 1-3GlcNAc $\beta$ 1-3)Gal $\beta$ 1-4Glc $\beta$ -sp4                                             | MFLNH III      |
| 539 | Gal $\beta$ 1-4GlcNAc $\beta$ 1-6(Fuca $\alpha$ 1-2Gal $\beta$ 1-3GlcNAc $\beta$ 1-3)Gal $\beta$ 1-4Glc $\beta$ -sp4                                               | MFLNH I        |

|      |                                                                               |                     |
|------|-------------------------------------------------------------------------------|---------------------|
| 540  | Galβ1-4(Fuca1-3)GlcNAcβ1-6(Neu5Aca2-6Galβ1-4GlcNAcβ1-3)Galβ1-4Glcβ-sp4        | MSMFLNnH            |
| 541  | Galβ1-4(Fuca1-3)GlcNAcβ1-6(Fuca1-2Galβ1-3GlcNAcβ1-3)Galβ1-4Glcβ-sp4           | DFLNH (a)           |
| 542  | Galβ1-3GlcNAcβ1-3Galβ1-4(Fuca1-3)GlcNAcβ1-6(Galβ1-3GlcNAcβ1-3)Galβ1-4Glcβ-sp4 | MF(1-3)iLNO         |
| 625  | (GlcAβ1-3GlcNAcβ1-4) <sub>11-12</sub> -NH <sub>2</sub> -ol                    | HyalU(11-12)-ol     |
| 627  | (Siaα2-6Aβ1-4GNβ1-2Mα1)2-3,6-Mβ1-4GNβ1-4GNβ-sp4                               | 11-OS               |
| 800  | GlcNAcα1-4GlcNAcβ-sp3                                                         | GNa4GN              |
| 801  | GalNAcα1-3GalNAc(fur)β-sp3                                                    | Fs(f)-2             |
| 900  | H-(Gly) <sub>6</sub> -NH <sub>2</sub> Gly6-amide, linear                      | Gly6                |
| 1001 | -4Qui3Nα1-3Rhaα1-4Galβ1-3(Glcβ1-4)GalNα1-                                     | S. enterica O28deAc |
| 1002 | -2Rib-ol5-P-6Galα1-3FucNAma1-3GlcNβ1-                                         | S. enterica O47deAc |
| 1003 | -4(Fuca1-3)GalNα1-6ManNα1-3Fuca1-3(Glcβ1-4)Galβ1-                             | S. enterica O16deAc |
| 1004 | -2Fuca1-2Galβ1-3GalNAcα1-3GlcNAcα1-                                           | S. enterica O13     |
| 1005 | -4Qui3NAcα1-3Rhaα1-4Galβ1-3(Glcβ1-4)GalNAcα1-                                 | S. enterica O28     |
| 1006 | -4(Fuca1-3)GalNAcα1-6Man2(20%)Ac3(40%)Ac4(20%)Acα1-3Fuca1-3(Glcβ1-4)Galβ1-    | S. enterica O16     |
| 1007 | -2(Galf α1-4)Galα1-3ManNAcβ1-6Galf β1-3GlcNAcβ1-                              | S. enterica O17     |
| 1008 | -3Galf 2(30%)Acβ1-3Galα1-                                                     | S. enterica O67     |
| 1009 | -3(S-3HOBu1-2Ala1-4)Qui4Nβ1-6GlcNAcα1-3QuiNAcα1-3GlcNAcα1-                    | S. enterica O58     |
| 1010 | -2Manβ1-4Glcα1-3QiuNAcα1-3GlcNAcα1-                                           | S. enterica O41     |
| 1011 | -3(GalNAcA6NH <sub>2</sub> α1-2)Rhaα1-2Rhaα1-3Rhaα1-2Rhaα1-3GlcNAcβ1-         | S. enterica O62     |
| 1012 | -2(Fuc3NFoa1-3)Manβ1-3Glcβ1-3GlcNAcβ1-                                        | S. enterica O60     |
| 1013 | -4Manα1-2Manα1-2Manβ1-3GalNAcα1-                                              | S. enterica O18     |
| 1014 | -2Galβ1-3GlcNAcα1-4Rhaα1-3GlcNAcβ1-                                           | S. enterica O59     |
| 1015 | -3(ManNAcβ1-2)Rhaα1-2Rhaα1-2Galα1-3GlcNAcβ1-                                  | S. enterica O42     |
| 1016 | -2Ribf β1-4Galβ1-4GlcNAcα1-4Galβ1-3GlcNAcα1-                                  | S. enterica O52     |
| 1017 | -3GlcNAcβ1-3(Manβ1-4)Galα1-4Rhaα1-                                            | S. enterica O11     |
| 1018 | -6Glcα1-4(GlcNAcβ1-3)Galβ1-3GalNAcα1-3GlcNAcβ1-                               | S. enterica O51     |

|      |                                                                                                                                   |                       |
|------|-----------------------------------------------------------------------------------------------------------------------------------|-----------------------|
| 1019 | -2Glc $\alpha$ 1-6Glc $\alpha$ 1-4(GlcNAc $\beta$ 1-3)Gal $\alpha$ 1-3GlcNAc $\beta$ 1-                                           | S. enterica O44       |
| 1020 | -7Neu5Ac $\alpha$ 2-3FucNAc $\alpha$ 1-3GlcNAc6Ac $\beta$ 1-                                                                      | S. enterica O21       |
| 1021 | -3(GlcNAc $\beta$ 1-2)Rha $\alpha$ 1-2Rha $\alpha$ 1-4Glc $\alpha$ 1-3GalNAc $\beta$ 1-                                           | S. enterica O57       |
| 1022 | -3(Ser2Ac1-4)Qui4N $\beta$ 1-3Ribf $\beta$ 1-4GalNAc $\alpha$ 1-3GlcNAc $\alpha$ 1-                                               | S. enterica O56       |
| 1023 | -3(Gal $\beta$ 1-4)Gal $\beta$ 1-4(GlcNAc $\beta$ 1-2)Glc $\beta$ 1-3GalNAc $\beta$ 1-                                            | S. enterica O38       |
| 1024 | -3(Rha2(%))Ac3(%))Ac4(%))Ac $\alpha$ 1-4Gal $\alpha$ 1-2)Rha $\alpha$ 1-4Glc $\alpha$ 1-2Rha $\alpha$ 1-3GlcNAc $\beta$ 1-        | C. sakazakii G2356 O2 |
| 1025 | -3FucNAc $\alpha$ 1-4(GlcNAc $\beta$ 1-2)Gal $\alpha$ 1-3FucNAc $\alpha$ 1-3GlcNAc $\beta$ 1-                                     | C. sakazakii G2592 O7 |
| 1026 | -2(Glc $\alpha$ 1-4)Glc $\beta$ 1-2Fuc3NR Hb $\beta$ 1-6GlcNAc $\alpha$ 1-4GalNAc $\alpha$ 1-3(Glc $\alpha$ 1-6)GlcNAc $\beta$ 1- | C. sakazakii G2594 O4 |
| 1027 | -4Qui3NAc $\alpha$ 1-3Rha $\alpha$ 1-6GlcNAc $\alpha$ 1-4GlcA $\beta$ 1-3(Glc $\beta$ 1-4)GalNAc $\alpha$ 1-                      | C. sakazakii G2726 O3 |
| 1201 | -4(Col $\alpha$ 1-3)(Col $\alpha$ 1-6)Glc $\alpha$ 1-4Gal $\alpha$ 1-3GlcNAc $\beta$ 1-                                           | E. coli O11           |
| 1202 | -2Gal $\beta$ 1-3FucNAc $\alpha$ 1-3GlcNAc $\beta$ 1-                                                                             | E. coli O15           |
| 1203 | -2Man $\alpha$ 1-2(Glc $\alpha$ 1-4)Man $\beta$ 1-3GlcNAc $\alpha$ 1-6Man $\alpha$ 1-                                             | E. coli O44           |
| 1204 | -2(S-3HOBut1-4)Qui4N $\alpha$ 1-4GalNAc $\beta$ 1-4Rha $\alpha$ 1-3GlcNAc6(30%)Ac $\beta$ 1-                                      | E. coli O49           |
| 1205 | -3(GlcNAc $\beta$ 1-2)Rha $\alpha$ 1-2Rha $\alpha$ 1-4Glc $\alpha$ 1-3GalNAc $\beta$ 1-                                           | E. coli O51           |
| 1206 | -3Fucf 2(50%)Ac $\beta$ 1-3-6dmanHep $\beta$ 1-                                                                                   | E. coli O52           |
| 1207 | -2-DRha4NAc $\alpha$ 1-3Fuca1-4Glc $\beta$ 1-3GalNAc $\alpha$ 1-                                                                  | E. coli O57           |
| 1208 | -4(R-Lac2-3Rhap2Ac $\alpha$ 1-3)Man $\beta$ 1-4Man $\alpha$ 1-3GalNAc $\beta$ 1-                                                  | E. coli O58           |
| 1209 | -4Quip3NAc $\alpha$ 1-3Rha $\alpha$ 1-4Gal $\beta$ 1-3GalNAc $\alpha$ 1-                                                          | E. coli O71           |
| 1210 | -6Man $\alpha$ 1-2(Glc $\alpha$ 1-4)Man $\alpha$ 1-2(Glc $\alpha$ 1-3)Man $\beta$ 1-3GlcNAc $\alpha$ 1-                           | E. coli O73           |
| 1211 | -2(Galf $\alpha$ 1-4)Gal $\alpha$ 1-3ManNAc $\beta$ 1-6Galf $\beta$ 1-3GlcNAc $\beta$ 1-                                          | E. coli O85           |
| 1212 | -3)Fuca1-3Xluf $\beta$ 1-                                                                                                         | E. coli O95           |
| 1213 | -3(Glc $\alpha$ 1-2)Rha $\alpha$ 1-2Rha $\alpha$ 1-2Rha $\alpha$ 1-3(Glc $\alpha$ 1-2)Rha $\alpha$ 1-                             | E. coli O99           |
| 1214 | -4-8eLeg5Ac7Ac $\alpha$ 2-6Gal $\alpha$ 1-3FucNAc $\alpha$ 1-3GlcNAc $\alpha$ 1-                                                  | E. coli O108          |
| 1215 | -4(GlcpNAc $\beta$ 1-3)GalNAc $\alpha$ 1-2Glc $\alpha$ 1-4L-Ido $\alpha$ 1-3GalNAc $\beta$ 1-                                     | E. coli O112ab        |
| 1216 | -3Rib-ol5-P-6Gal $\alpha$ 1-3FucNAc $\alpha$ 1-3GlcNAc $\beta$ 1-                                                                 | E. coli O118          |
| 1217 | -2(RhaNAc3NFo $\beta$ 1-3)Man $\beta$ 1-3Gal $\alpha$ 1-4Rha $\alpha$ 1-3GlcNAc $\alpha$ 1-                                       | E. coli O119          |

|      |                                                                                                                                                        |                         |
|------|--------------------------------------------------------------------------------------------------------------------------------------------------------|-------------------------|
| 1218 | -3(S-3HOBut1-2DAla1-4)Qui4Nβ1-6GlcNAcα1-3LQuiNAcα1-3GlcNAc6(30%)Acα1-                                                                                  | E. coli O123            |
| 1219 | -2(Glcα1-3)Manα1-3Fucα1-3GalNAcα1-4(Galβ1-3)GalNAcβ1-                                                                                                  | E. coli O125            |
| 1220 | -2Fuc3(65%)Ac4(35%)Acα1-2Galβ1-3GalNAcα1-3GalNAcα1-                                                                                                    | E. coli O127            |
| 1221 | -4(GalNAcβ1-3)Galα1-6Glcβ1-3GalNAcβ1-                                                                                                                  | E. coli O130            |
| 1222 | -3Rhaα1-3Rhaα1-2Glcα1-3GlcNAcα1-                                                                                                                       | E. coli O148            |
| 1223 | -3(S-Lac2-4)GlcNAcβ1-2Rhaα1-2Rhaα1-3(Glcβ1-2)Rhaα1-3GlcNAcβ1-                                                                                          | E. coli O150            |
| 1224 | -2Rib-ol5-P-6Galα1-3FucNAμα1-3(GlcNAcβ1-4)GlcNAcβ1-                                                                                                    | E. coli O151            |
| 1225 | -8(D-Ala1-7)Leg5Acα2-4GlcAβ1-3GlcNAcβ1-                                                                                                                | E. coli O161            |
| 1226 | -4(Fucα1-3)GlcNAc6(30%)Acα1-4GlcAα1-3Fucα1-3GlcNAcβ1-                                                                                                  | E. coli O168            |
| 1230 | Unpublished                                                                                                                                            | E. coli O10a10b         |
| 1231 | -2Glcβ1-6GlcNAcα1-3FucNAcα1-3GlcNAcβ1-                                                                                                                 | E. coli O12             |
| 1232 | Galα1-2Galα1-2(Galβ1-4)Glcα1-3Glcα1-/inner core-lipid A/                                                                                               | E. coli O14             |
| 1233 | -2Rhaα1-2Rhaα1-2Rhaα1-2Glcα1-3GlcNAc6Acα1-                                                                                                             | E. coli O19ab           |
| 1234 | Unpublished                                                                                                                                            | E. coli O27             |
| 1238 | -3Galα1-3(GlcAβ1-4)Fucα1-4GlcNAcβ1-3Fucα1-3GlcNAcβ1-                                                                                                   | E. coli O41             |
| 1239 | Unpublished                                                                                                                                            | E. coli O54             |
| 1240 | Unpublished                                                                                                                                            | E. coli O62             |
| 1241 | Unpublished                                                                                                                                            | E. coli O81             |
| 1401 | GalNAcα1-4GlcNAc3NAcAβ1-3DFucNAcα1-3QuiNAcβ1-3Rhaα1-3(Glcα1-6)Glcβ1-3(Glcα1-4)(L-Ala1-2)GalNA(P-6)1-3L-gro-manHep7Cμα1-3(P-2)(P-4)L-gro-manHepα1-5Kdoα | P. aeruginosa O1(F4)    |
| 1402 | -3Rhaα1-4LGalNAcAα1-3QuiNAcα1-                                                                                                                         | P. aeruginosa O10ac(F5) |
| 1403 | -2LGlcβ1-3FucNAcα1-3DFucNAcβ1-                                                                                                                         | P. aeruginosa O11ab     |
| 1404 | -2Rhaα1-3Rhaα1-4GalNAcA3Acα1-3QuiNAcβ1-                                                                                                                | P. aeruginosa O13ab     |
| 1405 | Rhaα1-3Rhaα1-4GalNAcAα1-3QuiNAcβ1-3Rhaα1-3(Glcα1-6)Glcβ1-3(Glcα1-4)(L-Ala1-2GalNA1-3(P-6)L-gro-manHep7Cμα1-3(P-2)(P-4)L-gro-manHepα1-5Kdoα             | P. aeruginosa O13ac     |

|      |                                                                                                                                                                                                                               |                          |
|------|-------------------------------------------------------------------------------------------------------------------------------------------------------------------------------------------------------------------------------|--------------------------|
| 1406 | Glc $\alpha$ 1-6Glc $\beta$ 1-3(Rha $\alpha$ 1-6Glc $\alpha$ 1-4)GalNA $\alpha$ 1-3(P-6)L-gro-manHep $\alpha$ 1-3(P-2)(P-4)L-gro-manHep $\alpha$ 1-5(Kdo $\alpha$ 2-4)Kdo $\alpha$ 2-6(P-4)GlcN $\beta$ 1-6GlcNA $\alpha$ 1-P | P. aeruginosa O14        |
| 1407 | -2Ribf $\beta$ 1-3GalNAc $\alpha$ 1-                                                                                                                                                                                          | P. aeruginosa O15        |
| 1408 | Unpublished                                                                                                                                                                                                                   | P. aeruginosa O2abc      |
| 1409 | -4ManNAc3NAmA $\beta$ 1-4LGulNAc3NAcA $\alpha$ 1-3DFucNAc4N $\beta$ 1-                                                                                                                                                        | P. aeruginosa O2ac       |
| 1410 | -4ManNAc3NAmA $\beta$ 1-4LGulNAc3NAcA $\alpha$ 1-3DFucNAc $\beta$ 1-                                                                                                                                                          | P. aeruginosa O2ac(F3)   |
| 1412 | -4LGulNAc3NAmA $\alpha$ 1-4ManNAc3NAcA $\beta$ 1-3DFucNAc4A $\alpha$ 1-                                                                                                                                                       | P. aeruginosa O2adf      |
| 1413 | -2LRha3A $\alpha$ 1-6GlcNAc $\alpha$ 1-4GalNAcA3A $\alpha$ 1-3(S-3HOBut1-4)QuiNAc4N $\beta$ 1-                                                                                                                                | P. aeruginosa O3(Habs 3) |
| 1416 | -2Rha $\alpha$ 1-3FucNAc $\alpha$ 1-3FucNAc $\alpha$ 1-3DFucNAc $\alpha$ 1-                                                                                                                                                   | P. aeruginosa O4ac       |
| 1418 | -3R-3HOBut1-7Pse4Ac5Ac $\beta$ 2-4DFucNAc $\alpha$ 1-3QuiNAc $\beta$ 1-                                                                                                                                                       | P. aeruginosa O9ad       |
| 1501 | Unpublished                                                                                                                                                                                                                   | P. genomospecies 5/6 O79 |
| 1601 | Unpublished                                                                                                                                                                                                                   | P. mirabilis 12B-r       |
| 1602 | -3(Rib1(50%)Ac-ol5-P-6)Gal $\beta$ 1-4(GlcNAc $\beta$ 1-2)Glc $\beta$ 1-3GlcNAc $\beta$ 1-                                                                                                                                    | P. mirabilis 1B-m        |
| 1603 | -2Glc $\beta$ 1-3L6dTal2(85%)A $\alpha$ 1-3GlcNAc $\beta$ 1-                                                                                                                                                                  | P. mirabilis 3B-m        |
| 1605 | -3(Glc $\alpha$ 1-6)GlcNAc $\beta$ 1-4(GlcNAc $\beta$ 1-2)GlcA $\beta$ 1-3(L-Thr2-6)GalA $\beta$ 1-                                                                                                                           | P. mirabilis O11         |
| 1606 | -3GlcNAc $\beta$ 1-3(S,R-CetLys2-6GalA $\alpha$ 1-4)Gal $\alpha$ 1-                                                                                                                                                           | P. mirabilis O13         |
| 1607 | GalNAc $\beta$ 1-4GalNAc $\alpha$ 1-3GlcNAc $\alpha$ 1-2Rib-ol                                                                                                                                                                | P. mirabilis O16         |
| 1608 | -3GlcA $\beta$ 1-4(Gal $\alpha$ 1-3)FucNAc $\alpha$ 1-3GlcNAc $\alpha$ 1-                                                                                                                                                     | P. mirabilis O23         |
| 1609 | -4(Lys2-6)GalA $\alpha$ 1-4Gal $\alpha$ 1-3(Ser-(2-6)GalA4A $\alpha$ 1-3GlcNAc $\beta$ 1-                                                                                                                                     | P. mirabilis O28         |
| 1610 | -3LQuiNAc $\alpha$ 1-3GlcNAc $\alpha$ 1-6(S-Lac-1-3)GlcNAc $\alpha$ 1-                                                                                                                                                        | P. mirabilis O31         |
| 1611 | -2(Rib-ol5-P-3)Gal $\beta$ 1-3GlcNAc $\alpha$ 1-3(EtN1-75%P-6)Glc $\beta$ 1-3GlcNAc $\beta$ 1-                                                                                                                                | P. mirabilis O33         |
| 1613 | -3(EtNAc1-P-6)GlcNAc $\alpha$ 1-3D-Asp2Ac4-4)Qui4N $\beta$ 1-6Glc $\alpha$ 1-4GalA $\alpha$ 1-                                                                                                                                | P. mirabilis O38         |
| 1614 | -6(GalA6(L-Lys) $\alpha$ 1-4)GalNAc $\beta$ 1-4(Glc $\alpha$ 1-2)GlcA $\beta$ 1-3GalNAc $\beta$ 1-                                                                                                                            | P. mirabilis O3ab        |
| 1615 | -4(GalA6(L-Thr)3A $\alpha$ 1-3)GalNAc $\beta$ 1-3Rha $\beta$ 1-4GlcNAc6Ac $\beta$ 1-                                                                                                                                          | P. mirabilis O58         |
| 1616 | -4(GlcA $\alpha$ 1-3)FucNAc $\alpha$ 1-3GlcNAc $\beta$ 1-                                                                                                                                                                     | P. mirabilis O6          |
| 1617 | -4(S,R-CetLys2-6)GlcA $\beta$ 1-6GalNAc $\alpha$ 1-6GlcNAc $\beta$ 1-3GlcNAc $\beta$ 1-                                                                                                                                       | P. mirabilis O60         |

|      |                                                                                                                                          |                       |
|------|------------------------------------------------------------------------------------------------------------------------------------------|-----------------------|
| 1618 | -6GlcNAc $\alpha$ 1-3Gal $\beta$ 1-3GalNAc $\alpha$ 1-                                                                                   | P. mirabilis OE       |
| 1701 | -3GlcA $\beta$ 1-4(Gal $\alpha$ 1-3)FucNAc $\alpha$ 1-3GlcNAc $\alpha$ 1-                                                                | P. penneri 107        |
| 1702 | -3(Glc $\beta$ 1-3GlcNAc4(S-Lac) $\beta$ 1-2)Rha $\alpha$ 1-2Rha $\alpha$ 1-2Gal6Ac $\alpha$ 1-3GlcNAc $\beta$ 1-                        | P. penneri 113        |
| 1703 | -4(Glc $\alpha$ 1-2)GlcA3Ac $\beta$ 1-3GlcNAc $\alpha$ 1-2(R-3HOBu1-3)Fuc3N $\beta$ 1-6Glc4Ac $\alpha$ 1-                                | P. penneri 17         |
| 1705 | -3Gal $\alpha$ 1-4GalNAc $\alpha$ 1-3FucNAc $\alpha$ 1-3(EtN1-P-6)GlcAc $\beta$ 1-                                                       | P. penneri 31         |
| 1706 | -6(S-Lac2-3)GlcNAc $\beta$ 1-3Gal $\alpha$ 1-3GlcNAc6Ac $\beta$ 1-                                                                       | P. penneri 40         |
| 1707 | -4(Glc $\alpha$ 1-3)Glc $\beta$ 1-3Gal $\beta$ 1-3GalNAc $\beta$ 1-4Rib-ol5-P-                                                           | P. penneri 75         |
| 1801 | -3(EtN1-P-6)GlcNAc $\alpha$ 1-2(R-3HOBu1-3)Fuc3N $\beta$ 1-6Glc $\alpha$ 1-4GlcA $\beta$ 1-                                              | P. vulgaris 32/57 O17 |
| 1802 | -4(L-Ala2-6)GlcA $\beta$ 1-3GalNAc $\beta$ 1-4Glc $\beta$ 1-3Gal $\alpha$ 1-4GalNAc $\beta$ 1-                                           | P. vulgaris 70/57 O44 |
| 1804 | -3GlcNAc $\beta$ 1-3(Qui3NAc2(65%)Ac4Ac $\alpha$ 1-2)Rha $\beta$ 1-4Rha $\alpha$ 1-4GlcA $\beta$ 1-                                      | P. vulgaris O22       |
| 1806 | -4GlcA $\beta$ 1-3GlcNAc $\beta$ 1-2(R-3HOBu1-2L-Ala1-4)Qui4N $\beta$ 1-3Gal $\alpha$ 1-                                                 | P. vulgaris O4        |
| 1807 | -4Glc6(65%)Ac $\alpha$ 1-3GlcA4Ac $\beta$ 1-3GlcNAc $\alpha$ 1-3GlcA4(87%)Ac $\beta$ 1-                                                  | P. vulgaris O46       |
| 1808 | -4Glc $\beta$ 1-3GalNAc $\beta$ 1-4GalNAc $\beta$ 1-4Gal $\beta$ 1-                                                                      | P. vulgaris O65       |
| 1809 | -4LQuiNAc $\alpha$ 1-3GlcNAc $\alpha$ 1-4(LQuiNAc $\alpha$ 1-3)GalNAc $\alpha$ 1-4Gal $\alpha$ 1-P                                       | P. vulgaris OX19      |
| 1810 | -4Glc $\beta$ 1-3GalNAc $\beta$ 1-4GalNAc $\beta$ 1-4Gal $\beta$ 1-                                                                      | P. vulgaris TG251     |
| 2001 | -3(Ribf $\beta$ 1-4GlcA $\beta$ 1-4)Gal $\alpha$ 1-6Man $\alpha$ 1-2Man $\alpha$ 1-3GalNAc $\beta$ 1-                                    | Sh. boydii type 10    |
| 2002 | -3GlcNAc $\beta$ 1-4GlcA3Ac $\beta$ 1-2(Rha3Ac $\alpha$ 1-3)Man $\alpha$ 1-4Gal $\beta$ 1-                                               | Sh. boydii type 12    |
| 2003 | -6Gal $\alpha$ 1-4GlcA $\beta$ 1-6Gal $\beta$ 1-4Gal $\beta$ 1-4GlcNAc $\beta$ 1-                                                        | Sh. boydii type 14    |
| 2004 | -4(GlcNAc $\beta$ 1-3)GalNAc $\alpha$ 1-4Glc $\alpha$ 1-4L-IdoA $\alpha$ 1-3GalNAc $\beta$ 1-                                            | Sh. boydii type 15    |
| 2005 | -4GlcA $\beta$ 1-2(Gal $\alpha$ 1-3)Man6(50%)Ac $\beta$ 1-4Man $\beta$ 1-3GlcNAc $\beta$ 1-                                              | Sh. boydii type 16    |
| 2006 | -6(R-Lac2-4)Glc $\beta$ 1-4GalNAc $\alpha$ 1-3GalNAc $\beta$ 1-                                                                          | Sh. boydii type 17    |
| 2007 | -3Rha $\beta$ 1-4Rha $\alpha$ 1-2Rha $\alpha$ 1-2GalA $\alpha$ 1-3GalNAc $\alpha$ 1-                                                     | Sh. boydii type 18    |
| 2008 | -2Ribf $\beta$ 1-4GalA $\alpha$ 1-3GlcNAc $\alpha$ 1-2(Galf $\beta$ 1-3)Rha $\alpha$ 1-2Rha $\alpha$ 1-2Ribf $\beta$ 1-4GalA $\alpha$ 1- | Sh. boydii type 2     |
| 2009 | -3(GlcA $\beta$ 1-4)Gal $\alpha$ 1-6Man $\alpha$ 1-2Man $\alpha$ 1-3GalNAc $\beta$ 1-                                                    | Sh. boydii type 6     |
| 2010 | -2Galf $\beta$ 1-3GlcNAc $\alpha$ 1-8(3HOBu1-7)Pse5Ac2-6Gal $\alpha$ 1-6Glc $\alpha$ 1-                                                  | Sh. boydii type 7     |
| 2011 | -3GalNAc $\alpha$ 1-4GlcA $\beta$ 1-3GlcNAc $\beta$ 1-2GalA $\beta$ 1-                                                                   | Sh. boydii type 8     |

|      |                                                                                                           |                             |
|------|-----------------------------------------------------------------------------------------------------------|-----------------------------|
| 2012 | -4Glc $\alpha$ 1-4GlcA $\beta$ 1-3GlcNAc $\alpha$ 1-3Rha $\alpha$ 1-                                      | Sh. boydii type 9           |
| 2013 | Unpublished                                                                                               | Sh. boydii type X           |
| 2101 | -3Rha $\alpha$ 1-3Rha $\alpha$ 1-2Gal $\alpha$ 1-3GlcNAc $\alpha$ 1-                                      | Sh. dysenteriae type 1      |
| 2102 | -1D-Gro3-P-6Glc $\beta$ 1-4(Glc $\alpha$ 1-6Gal2(25%)Ac $\alpha$ 1-3)FucNAc $\alpha$ 1-3GlcNAc $\beta$ 1- | Sh. dysenteriae type 11     |
| 2103 | -3(R-Lac2-4Glc $\beta$ 1-6Glc $\alpha$ 1-4)Gal $\beta$ 1-6Gal $f$ $\beta$ 1-3GalNAc $\beta$ 1-            | Sh. dysenteriae type 3      |
| 2104 | -3GlcNAc $\alpha$ 1-3(Fuc3Ac4Ac $\alpha$ 1-4)GlcNAc $\alpha$ 1-4GlcA $\alpha$ 1-3Fuc $\alpha$ 1-          | Sh. dysenteriae type 4      |
| 2105 | GalNAcA3Ac6NH $2\alpha$ 1-4GalNAcA $\alpha$ 1-3GlcNAc                                                     | Sh. dysenteriae type 7      |
| 2106 | -4GlcA $\beta$ 1-3GalNAc $\beta$ 1-3(GlcNAc $\beta$ 1-4Glc $\beta$ 1-4)GalNAc $\beta$ 1-                  | Sh. dysenteriae type 8      |
| 2107 | -2Gal3,4(R Pyr) $\beta$ 1-4Man $\beta$ 1-4Gal $\alpha$ 1-3GlcNAc $\beta$ 1-                               | Sh. dysenteriae type 9      |
| 2201 | -3GlcNAc $\beta$ 1-2Rha $\alpha$ 1-2Rha $\alpha$ 1-3(Glc $\alpha$ 1-4)Rha $\alpha$ 1-                     | Sh. flexneri type 2a        |
| 2202 | -3GlcNAc $\beta$ 1-2(Glc $\alpha$ 1-3)Rha $\alpha$ 1-2Rha $\alpha$ 1-3(Glc $\alpha$ 1-4)Rha $\alpha$ 1-   | Sh. flexneri type 2b        |
| 2203 | -3GlcNAc $\beta$ 1-2(Glc $\alpha$ 1-3)Rha $\alpha$ 1-2Rha $\alpha$ 1-3Rha2Ac $\alpha$ 1-                  | Sh. flexneri type 3a        |
| 2204 | -2Rha $\alpha$ 1-2Rha $\alpha$ 1-3Rha2Ac $\alpha$ 1-3GlcNAc $\beta$ 1-                                    | Sh. flexneri type 3b        |
| 2205 | -3(Glc $\alpha$ 1-6)GlcNAc $\beta$ 1-2Rha $\alpha$ 1-2Rha $\alpha$ 1-3Rha $\alpha$ 1-                     | Sh. flexneri type 4a        |
| 2206 | -3(Glc $\alpha$ 1-6)GlcNAc $\beta$ 1-2Rha $\alpha$ 1-2Rha $\alpha$ 1-3Rha2Ac $\alpha$ 1-                  | Sh. flexneri type 4b        |
| 2207 | -3GlcNAc $\beta$ 1-2Rha $\alpha$ 1-2(Glc $\alpha$ 1-3)Rha $\alpha$ 1-3Rha $\alpha$ 1-                     | Sh. flexneri type 5a        |
| 2208 | -3GlcNAc $\beta$ 1-2(Glc $\alpha$ 1-3)Rha $\alpha$ 1-2(Glc $\alpha$ 1-3)Rha $\alpha$ 1-3Rha $\alpha$ 1-   | Sh. flexneri type 5b        |
| 2209 | -2Rha3(%)Ac4(%)Ac $\alpha$ 1-2Rha $\alpha$ 1-4GalA $\beta$ 1-3GalNAc $\beta$ 1-                           | Sh. flexneri type 6         |
| 2210 | -2Rha3(60%)Ac4(30%)Ac $\alpha$ 1-2Rha $\alpha$ 1-4GalA $\beta$ 1-3GalNAc $\beta$ 1-                       | Sh. flexneri type 6b        |
| 2211 | -3GlcNAc $\beta$ 1-2(Glc $\alpha$ 1-3)Rha $\alpha$ 1-2Rha $\alpha$ 1-3Rha $\alpha$ 1-                     | Sh. flexneri type X         |
| 2212 | -2Rha $\alpha$ 1-2Rha $\alpha$ 1-3Rha $\alpha$ 1-3GlcNAc $\beta$ 1-                                       | Sh. flexneri type Y         |
| 2501 | Streptococcus equi sp. hyaluronic acid sodium salt                                                        | S. equi sp. hyaluronic acid |
| 3001 | -3Glc $\beta$ 1-                                                                                          | S. cerevisiae zymozaan A    |
| 3301 | -3Glc $\beta$ 1-6Glc $\beta$ 1-                                                                           | Laminarin                   |
| 3302 | -3Glc $\beta$ 1-                                                                                          | Laminaran                   |
| 3401 | -4Glc $\beta$ 1-4Glc $\beta$ 1-3Glc $\beta$ 1-                                                            | bGlucan                     |

|      |                                 |              |
|------|---------------------------------|--------------|
| 9001 | -3Glcβ1-3Glcβ1-3(Glcβ1-6)Glcβ1- | Scleroglucan |
| 9002 | -3Glcβ1-                        | Curdlan      |
| 9003 | -4GlcN(%)Acβ1-                  | Chitosan     |

**LEGEND:**

sp1 = ol = aminoalditol

sp2 = C2 = -O(CH<sub>2</sub>)<sub>2</sub>NH<sub>2</sub>

sp3 = C3 = -O(CH<sub>2</sub>)<sub>3</sub>NH<sub>2</sub>

sp4 =Gly = -NHCOCH<sub>2</sub>NH<sub>2</sub>

sp5 =C8 = -O(CH<sub>2</sub>)<sub>3</sub>NH-CO(CH<sub>2</sub>)<sub>5</sub>NH<sub>2</sub>

sp7 = Ph = -OC<sub>6</sub>H<sub>4</sub>-p-NH<sub>2</sub>

sp8 = PEG = -(OCH<sub>2</sub>CH<sub>2</sub>)<sub>6</sub>NH<sub>2</sub>

sp9 = Bn = -OCH<sub>2</sub>C<sub>6</sub>H<sub>4</sub>-p-NHCOCH<sub>2</sub>NH<sub>2</sub>

sp10 = PEG2 = -(OCH<sub>2</sub>CH<sub>2</sub>)<sub>2</sub>NH<sub>2</sub>

sp12 = PEG3 = H<sub>2</sub>N-(CH<sub>2</sub>CH<sub>2</sub>O)<sub>3</sub>-CH<sub>2</sub>CH<sub>2</sub>CO

LPS - lipopolysaccharide

sp0 = other spacers:Asn, Ser, C2Et etc.

Ala = alanine

Arg = arginine

Asn = asparagine, NH-CO-CH<sub>2</sub>CH(COOH)NH<sub>2</sub>

Ile = iso-leucine

Nle = norleucine

Ser = serine, -OCH<sub>2</sub>CH(COOH)NH<sub>2</sub>

Trp = tryptophan

Phe = phenylalanine, -COCH(CH<sub>2</sub>C<sub>6</sub>H<sub>5</sub>)NH<sub>2</sub>

C2Et = -O(CH<sub>2</sub>)<sub>2</sub>NHEt

Cit = citrullin

A = Gal

AN = GalNAc

Ch = chito

F = L-Fuc

G = Glc

Gc = glycolyl

GN = GlcNAcβ

R = Rha

i = iso

(fur, f) = furanose cycle

Fm = formyl

Lac = lactose

LN = N-acetyllactosamine

M = Man

MN = ManNAc

Malt = maltose

OS = oligosaccharide

P = phosphate

S = Sia = Neu5Ac $\alpha$

Su = sulfate

Tn = GalNAc $\alpha$

U = uronic acid

D-Fuc3NR Hb = 3,6-dideoxy-3-[(*R*)-3-hydroxybutanoyl]-D-galactose

D-Xlu = D-*threo*-pent-2-ulose (D-xylulose)

8eLeg = 8-epilegionaminic acid

8-Leg = 8-legionaminic acid

L-Ido = L-iduronic acid

D-aThr = D-allothreonine

Dhpa = (2*R*,4*R*)-2,4-dihydroxypentanoic acid

L-6dTal = 6-deoxy-L-talose

HEP = L-glycero-D-manno-heptopyranose
