# Supplementary material for: Repertoire of Abs primed by bacteria in gnotobiotic mice
Source: PubMed Central journal article supplement — Innate Immun. 2018 Mar 16;24(3):180–7. doi: 10.1177/1753425918763524 (PMC6852387; doi:10.1177/1753425918763524), 2018-03-16
Supplement: Supplementary_table3.pdf [file Supplementary_table3.pdf]

**Supplementary Table 3.** Fluorescent signals (0-65535 RFU, relative fluorescent units) for each animal. - is median of 6-8 replicates of particular glycan; Q1 and Q3 - 25%- and 75% quartiles as a measure deviation. All "positive" signals marked with **red** colour; measure of "positivity" is a signal that is 5 times greater than the background value, which was not higher than 300 RFU. Measurement of 5-time greater background values is our conventional practice.

Supplementary Table 3.1 represents all fluorescent signals (0-65535 RFU, relative fluorescent units) for groups of sterile animals

| Mouse ID | 1.1    |        |        | 1.2    |        |        | 1.3    |        |        | 1.4    |        |
|----------|--------|--------|--------|--------|--------|--------|--------|--------|--------|--------|--------|
| Nr       | Median | -1st Q | +3rd Q | Median | -1st Q | +3rd Q | Median | -1st Q | +3rd Q | Median | -1st Q |
| 001      | 29     | 28     | 5      | 82     | 41     | 1214   | 5      | 4      | 152    | 10     | 7      |
| 002      | 126    | 100    | 3280   | 182    | 96     | 129    | 76     | 75     | 3      | 15     | 10     |
| 003      | 13     | 6      | 4      | 39     | 15     | 6      | 66     | 41     | 88     | 22     | 18     |
| 004      | 4      | 2      | 2      | 4      | 1      | 3      | 17     | 9      | 12     | 3      | 2      |
| 005      | 1      | 0      | 1      | 24     | 4      | 16     | 10     | 3      | 10     | 8      | 5      |
| 006      | 18     | 17     | 11     | 36     | 28     | 20     | 5      | 4      | 48     | 9      | 6      |
| 007      | 7      | 5      | 47     | 91     | 52     | 58     | 10     | 9      | 3      | 9      | 6      |
| 009      | 8      | 5      | 6      | 7      | 3      | 3      | 17     | 8      | 5      | 1      | 0      |
| 010      | 14     | 6      | 1      | 31     | 22     | 5      | 10     | 8      | 4      | 5      | 3      |
| 011      | 23     | 14     | 3      | 28     | 23     | 20     | 1      | 0      | 11     | 13     | 8      |
| 012      | 24     | 16     | 37     | 26     | 9      | 9      | 24     | 20     | 13     | 16     | 8      |
| 013      | 6      | 3      | 3      | 16     | 4      | 10     | 14     | 8      | 10     | 3      | 1      |
| 014      | 4      | 1      | 3      | 2      | 1      | 2      | 6      | 3      | 7      | 1      | 0      |
| 015      | 2      | 1      | 0      | 10     | 4      | 13     | 10     | 7      | 6      | 5      | 2      |
| 016      | 17     | 6      | 13     | 41     | 12     | 44     | 2      | 1      | 5      | 8      | 6      |
| 017      | 13     | 7      | 9      | 49     | 19     | 17     | 12     | 5      | 13     | 10     | 3      |
| 018      | 10     | 5      | 6      | 23     | 3      | 2      | 21     | 13     | 15     | 3      | 2      |
| 019      | 7      | 2      | 3      | 2      | 1      | 2      | 5      | 2      | 8      | 1      | 0      |
| 020      | 6      | 4      | 3      | 1519   | 122    | 107    | 12     | 9      | 6      | 5      | 3      |
| 021      | 5      | 2      | 13     | 26     | 15     | 7      | 3      | 1      | 16     | 3      | 1      |
| 022      | 10     | 4      | 19     | 33     | 9      | 43     | 11     | 7      | 7      | 7      | 1      |
| 023      | 9      | 5      | 6      | 14     | 3      | 8      | 16     | 6      | 8      | 3      | 1      |
| 024      | 16     | 7      | 5      | 9      | 4      | 6      | 8      | 3      | 4      | 3      | 2      |
| 025      | 3      | 2      | 2      | 11     | 8      | 1      | 7      | 4      | 7      | 6      | 4      |
| 026      | 13     | 9      | 10     | 22     | 7      | 15     | 3      | 1      | 1      | 4      | 3      |
| 027      | 14     | 7      | 8      | 24     | 13     | 7      | 11     | 4      | 5      | 9      | 3      |
| 037      | 15     | 9      | 5      | 31     | 15     | 21     | 23     | 13     | 17     | 7      | 5      |
| 038      | 6      | 2      | 21     | 5      | 2      | 1      | 9      | 3      | 4      | 4      | 3      |
| 043      | 17     | 5      | 5      | 60     | 49     | 53     | 5      | 4      | 1      | 2      | 0      |
| 044      | 6      | 2      | 7      | 18     | 3      | 15     | 14     | 7      | 10     | 8      | 3      |
| 045      | 24     | 11     | 353    | 17     | 8      | 46     | 17     | 3      | 30     | 3      | 0      |
| 046      | 4      | 2      | 3      | 3      | 1      | 1      | 10     | 4      | 7      | 3      | 2      |
| 047      | 5      | 4      | 2      | 12     | 5      | 14     | 3      | 2      | 7      | 5      | 3      |
| 048      | 34     | 30     | 678    | 18     | 9      | 385    | 4      | 3      | 17     | 3      | 2      |
| 049      | 12     | 9      | 1      | 22     | 4      | 9      | 13     | 8      | 5      | 6      | 1      |
| 050      | 16     | 6      | 1551   | 14     | 5      | 5      | 18     | 13     | 7      | 4      | 3      |
| 051      | 4      | 1      | 0      | 1      | 0      | 1      | 8      | 1      | 9      | 2      | 1      |
| 052      | 3      | 1      | 0      | 10     | 4      | 16     | 13     | 8      | 5      | 8      | 6      |
| 053      | 8      | 5      | 1      | 7      | 5      | 7      | 1      | 0      | 1      | 6      | 3      |
| 054      | 12     | 10     | 6      | 32     | 13     | 2      | 9      | 5      | 7      | 10     | 7      |

|     |    |    |     |    |    |     |    |    |    |    |    |
|-----|----|----|-----|----|----|-----|----|----|----|----|----|
| 055 | 3  | 2  | 2   | 18 | 4  | 13  | 13 | 8  | 2  | 2  | 1  |
| 071 | 12 | 5  | 4   | 4  | 3  | 5   | 10 | 3  | 4  | 1  | 0  |
| 072 | 3  | 2  | 2   | 8  | 3  | 1   | 10 | 7  | 1  | 11 | 8  |
| 073 | 11 | 6  | 4   | 13 | 8  | 13  | 1  | 0  | 2  | 7  | 4  |
| 074 | 13 | 10 | 6   | 30 | 6  | 14  | 12 | 4  | 8  | 8  | 2  |
| 075 | 4  | 2  | 12  | 15 | 3  | 5   | 19 | 9  | 6  | 6  | 4  |
| 076 | 14 | 6  | 18  | 5  | 3  | 4   | 6  | 3  | 4  | 2  | 1  |
| 077 | 14 | 9  | 12  | 17 | 7  | 11  | 9  | 5  | 10 | 8  | 6  |
| 078 | 20 | 8  | 20  | 8  | 4  | 35  | 2  | 1  | 2  | 15 | 13 |
| 080 | 44 | 31 | 23  | 44 | 13 | 5   | 37 | 22 | 14 | 4  | 0  |
| 081 | 15 | 6  | 2   | 4  | 1  | 2   | 4  | 3  | 7  | 1  | 0  |
| 082 | 2  | 0  | 2   | 6  | 2  | 3   | 8  | 5  | 7  | 6  | 4  |
| 083 | 6  | 3  | 7   | 8  | 2  | 7   | 3  | 1  | 0  | 5  | 3  |
| 084 | 20 | 13 | 18  | 32 | 9  | 30  | 12 | 2  | 8  | 11 | 5  |
| 085 | 6  | 5  | 3   | 23 | 12 | 2   | 14 | 5  | 20 | 3  | 1  |
| 086 | 6  | 2  | 13  | 2  | 1  | 2   | 6  | 1  | 4  | 2  | 1  |
| 087 | 4  | 1  | 7   | 8  | 4  | 6   | 6  | 3  | 0  | 4  | 2  |
| 088 | 34 | 17 | 14  | 34 | 25 | 11  | 8  | 5  | 6  | 10 | 4  |
| 089 | 25 | 5  | 9   | 38 | 15 | 14  | 13 | 1  | 1  | 13 | 5  |
| 092 | 8  | 4  | 1   | 4  | 2  | 14  | 14 | 8  | 6  | 1  | 0  |
| 093 | 1  | 0  | 2   | 6  | 3  | 2   | 6  | 3  | 6  | 4  | 3  |
| 094 | 9  | 2  | 14  | 15 | 6  | 3   | 4  | 1  | 3  | 2  | 1  |
| 096 | 52 | 40 | 32  | 61 | 37 | 12  | 21 | 7  | 17 | 6  | 2  |
| 097 | 22 | 15 | 9   | 12 | 5  | 40  | 19 | 10 | 8  | 3  | 2  |
| 098 | 4  | 1  | 101 | 11 | 7  | 106 | 6  | 2  | 11 | 11 | 6  |
| 099 | 3  | 2  | 5   | 5  | 2  | 5   | 2  | 1  | 5  | 4  | 2  |
| 100 | 13 | 9  | 11  | 36 | 13 | 82  | 8  | 6  | 7  | 7  | 4  |
| 101 | 16 | 11 | 9   | 31 | 8  | 113 | 18 | 10 | 7  | 2  | 0  |
| 102 | 27 | 14 | 463 | 7  | 2  | 8   | 12 | 7  | 5  | 2  | 1  |
| 103 | 3  | 1  | 1   | 6  | 2  | 1   | 8  | 4  | 19 | 10 | 7  |
| 104 | 6  | 5  | 25  | 6  | 2  | 3   | 2  | 1  | 2  | 9  | 7  |
| 105 | 36 | 34 | 25  | 35 | 9  | 17  | 11 | 6  | 5  | 9  | 3  |
| 106 | 2  | 1  | 4   | 18 | 9  | 13  | 14 | 5  | 10 | 2  | 0  |
| 107 | 12 | 1  | 1   | 10 | 9  | 0   | 9  | 4  | 5  | 3  | 2  |
| 110 | 28 | 21 | 14  | 10 | 4  | 14  | 2  | 1  | 3  | 6  | 4  |
| 111 | 12 | 8  | 7   | 14 | 5  | 9   | 12 | 8  | 5  | 6  | 1  |
| 112 | 4  | 3  | 2   | 12 | 3  | 5   | 12 | 6  | 3  | 3  | 2  |
| 113 | 22 | 11 | 1   | 10 | 4  | 5   | 5  | 3  | 2  | 2  | 1  |
| 114 | 3  | 2  | 1   | 4  | 1  | 2   | 10 | 5  | 3  | 9  | 4  |
| 115 | 8  | 6  | 1   | 7  | 4  | 2   | 3  | 2  | 0  | 8  | 6  |
| 116 | 11 | 6  | 5   | 11 | 4  | 8   | 8  | 2  | 3  | 4  | 0  |
| 117 | 5  | 2  | 2   | 9  | 6  | 6   | 11 | 2  | 16 | 1  | 0  |
| 118 | 7  | 2  | 2   | 3  | 1  | 2   | 5  | 3  | 8  | 3  | 2  |
| 119 | 2  | 0  | 1   | 6  | 2  | 2   | 8  | 4  | 3  | 5  | 3  |
| 120 | 8  | 5  | 9   | 6  | 2  | 6   | 3  | 1  | 1  | 9  | 5  |
| 121 | 10 | 5  | 4   | 14 | 6  | 8   | 13 | 3  | 3  | 9  | 2  |
| 122 | 4  | 3  | 5   | 9  | 6  | 8   | 13 | 3  | 14 | 4  | 1  |
| 123 | 2  | 1  | 5   | 3  | 2  | 0   | 6  | 3  | 6  | 2  | 1  |
| 125 | 13 | 3  | 16  | 16 | 9  | 13  | 5  | 2  | 8  | 12 | 8  |
| 126 | 17 | 8  | 4   | 52 | 11 | 6   | 13 | 3  | 3  | 13 | 5  |

|     |    |    |     |     |     |    |    |    |    |    |    |
|-----|----|----|-----|-----|-----|----|----|----|----|----|----|
| 127 | 8  | 6  | 20  | 24  | 12  | 7  | 21 | 7  | 5  | 4  | 2  |
| 128 | 7  | 6  | 26  | 7   | 4   | 5  | 17 | 7  | 5  | 2  | 1  |
| 129 | 4  | 1  | 4   | 16  | 8   | 20 | 8  | 4  | 3  | 3  | 2  |
| 130 | 14 | 6  | 2   | 19  | 6   | 8  | 11 | 5  | 11 | 5  | 3  |
| 131 | 27 | 16 | 6   | 132 | 27  | 32 | 27 | 6  | 14 | 16 | 5  |
| 132 | 14 | 8  | 1   | 16  | 7   | 21 | 14 | 2  | 3  | 4  | 2  |
| 133 | 4  | 3  | 7   | 2   | 0   | 1  | 10 | 4  | 8  | 1  | 0  |
| 134 | 4  | 1  | 41  | 9   | 5   | 11 | 13 | 5  | 9  | 10 | 6  |
| 135 | 4  | 3  | 4   | 7   | 2   | 2  | 2  | 1  | 4  | 3  | 2  |
| 136 | 28 | 16 | 327 | 33  | 8   | 10 | 19 | 9  | 9  | 10 | 6  |
| 137 | 12 | 7  | 341 | 8   | 1   | 8  | 18 | 12 | 27 | 2  | 1  |
| 138 | 6  | 3  | 203 | 1   | 0   | 1  | 10 | 4  | 3  | 2  | 1  |
| 139 | 7  | 4  | 9   | 5   | 2   | 2  | 12 | 9  | 4  | 5  | 4  |
| 140 | 85 | 28 | 53  | 60  | 52  | 50 | 7  | 5  | 71 | 28 | 18 |
| 142 | 8  | 1  | 14  | 16  | 5   | 5  | 15 | 9  | 21 | 5  | 3  |
| 143 | 11 | 4  | 2   | 3   | 2   | 2  | 5  | 1  | 2  | 2  | 1  |
| 144 | 5  | 2  | 3   | 5   | 2   | 1  | 12 | 6  | 9  | 12 | 9  |
| 145 | 11 | 6  | 6   | 8   | 3   | 14 | 2  | 1  | 1  | 11 | 8  |
| 146 | 28 | 20 | 8   | 30  | 8   | 15 | 15 | 6  | 1  | 10 | 3  |
| 149 | 3  | 1  | 2   | 8   | 2   | 3  | 12 | 10 | 9  | 10 | 7  |
| 150 | 8  | 6  | 4   | 23  | 16  | 58 | 4  | 2  | 5  | 8  | 6  |
| 151 | 13 | 8  | 5   | 20  | 5   | 4  | 10 | 3  | 2  | 7  | 3  |
| 152 | 10 | 7  | 8   | 16  | 7   | 3  | 11 | 2  | 5  | 2  | 1  |
| 153 | 6  | 1  | 4   | 1   | 0   | 1  | 4  | 2  | 7  | 2  | 1  |
| 154 | 2  | 1  | 2   | 8   | 2   | 30 | 12 | 8  | 4  | 6  | 3  |
| 156 | 13 | 7  | 6   | 35  | 16  | 6  | 10 | 2  | 2  | 7  | 2  |
| 158 | 5  | 3  | 7   | 4   | 2   | 3  | 7  | 4  | 9  | 4  | 3  |
| 159 | 5  | 2  | 3   | 7   | 3   | 7  | 9  | 3  | 13 | 4  | 1  |
| 160 | 13 | 7  | 8   | 12  | 3   | 11 | 5  | 2  | 1  | 8  | 6  |
| 161 | 15 | 6  | 19  | 22  | 12  | 8  | 11 | 2  | 8  | 7  | 2  |
| 162 | 14 | 9  | 24  | 29  | 13  | 2  | 14 | 6  | 25 | 4  | 2  |
| 164 | 5  | 3  | 3   | 8   | 3   | 2  | 6  | 3  | 21 | 4  | 1  |
| 165 | 12 | 1  | 1   | 17  | 5   | 11 | 7  | 4  | 12 | 5  | 3  |
| 166 | 10 | 6  | 7   | 19  | 8   | 8  | 13 | 4  | 5  | 8  | 2  |
| 167 | 15 | 12 | 5   | 13  | 6   | 4  | 13 | 3  | 9  | 4  | 2  |
| 168 | 6  | 4  | 11  | 4   | 1   | 4  | 11 | 6  | 2  | 1  | 0  |
| 169 | 10 | 7  | 17  | 9   | 5   | 86 | 8  | 6  | 8  | 9  | 6  |
| 170 | 14 | 11 | 36  | 30  | 16  | 37 | 8  | 6  | 10 | 5  | 3  |
| 171 | 19 | 10 | 130 | 16  | 10  | 6  | 10 | 7  | 2  | 5  | 1  |
| 173 | 28 | 15 | 68  | 11  | 8   | 13 | 9  | 8  | 10 | 6  | 5  |
| 174 | 10 | 3  | 8   | 2   | 1   | 0  | 16 | 4  | 5  | 2  | 1  |
| 175 | 6  | 3  | 15  | 7   | 3   | 9  | 14 | 10 | 10 | 7  | 5  |
| 176 | 14 | 12 | 4   | 411 | 273 | 63 | 1  | 0  | 1  | 5  | 4  |
| 177 | 15 | 13 | 10  | 794 | 133 | 88 | 10 | 4  | 7  | 6  | 1  |
| 178 | 9  | 5  | 7   | 15  | 7   | 5  | 31 | 21 | 14 | 4  | 3  |
| 179 | 2  | 0  | 1   | 3   | 2   | 0  | 8  | 6  | 4  | 2  | 0  |
| 180 | 3  | 1  | 3   | 7   | 2   | 3  | 15 | 10 | 11 | 10 | 7  |
| 181 | 18 | 10 | 8   | 530 | 149 | 73 | 2  | 1  | 2  | 13 | 10 |
| 182 | 13 | 7  | 7   | 17  | 4   | 9  | 8  | 6  | 6  | 7  | 3  |
| 183 | 12 | 11 | 7   | 8   | 3   | 3  | 13 | 2  | 17 | 2  | 0  |

|     |    |    |    |    |    |    |    |    |    |    |   |
|-----|----|----|----|----|----|----|----|----|----|----|---|
| 184 | 6  | 4  | 1  | 1  | 0  | 1  | 7  | 5  | 6  | 1  | 0 |
| 186 | 12 | 8  | 17 | 24 | 17 | 13 | 3  | 1  | 1  | 11 | 7 |
| 187 | 13 | 7  | 0  | 24 | 12 | 3  | 9  | 5  | 4  | 5  | 0 |
| 188 | 9  | 6  | 1  | 4  | 1  | 6  | 10 | 3  | 10 | 2  | 1 |
| 189 | 7  | 4  | 7  | 4  | 2  | 1  | 8  | 5  | 7  | 2  | 1 |
| 190 | 4  | 1  | 5  | 10 | 6  | 10 | 12 | 8  | 19 | 10 | 7 |
| 191 | 18 | 15 | 9  | 18 | 9  | 11 | 5  | 4  | 3  | 10 | 7 |
| 192 | 10 | 4  | 6  | 58 | 8  | 15 | 10 | 3  | 0  | 7  | 2 |
| 193 | 7  | 3  | 3  | 17 | 7  | 6  | 17 | 1  | 2  | 3  | 1 |
| 194 | 2  | 1  | 1  | 3  | 1  | 4  | 5  | 3  | 3  | 3  | 2 |
| 195 | 5  | 2  | 2  | 12 | 2  | 15 | 13 | 7  | 5  | 5  | 3 |
| 196 | 12 | 6  | 6  | 17 | 5  | 9  | 4  | 1  | 1  | 10 | 8 |
| 197 | 11 | 4  | 23 | 14 | 6  | 2  | 15 | 5  | 4  | 9  | 4 |
| 198 | 8  | 6  | 8  | 10 | 5  | 2  | 19 | 8  | 5  | 3  | 0 |
| 199 | 3  | 2  | 10 | 3  | 2  | 1  | 8  | 6  | 3  | 3  | 2 |
| 200 | 5  | 2  | 2  | 6  | 1  | 3  | 8  | 5  | 8  | 4  | 2 |
| 201 | 10 | 3  | 7  | 24 | 6  | 4  | 8  | 6  | 11 | 6  | 4 |
| 202 | 12 | 4  | 4  | 17 | 3  | 5  | 12 | 2  | 7  | 9  | 1 |
| 203 | 21 | 6  | 7  | 21 | 5  | 28 | 24 | 13 | 1  | 5  | 2 |
| 204 | 4  | 2  | 2  | 3  | 2  | 1  | 8  | 4  | 5  | 2  | 1 |
| 205 | 9  | 4  | 8  | 10 | 5  | 6  | 14 | 5  | 5  | 13 | 8 |
| 206 | 19 | 16 | 3  | 24 | 8  | 7  | 2  | 1  | 8  | 2  | 1 |
| 207 | 34 | 26 | 6  | 27 | 14 | 11 | 12 | 10 | 3  | 10 | 6 |
| 215 | 41 | 18 | 40 | 18 | 12 | 16 | 20 | 10 | 18 | 2  | 1 |
| 216 | 18 | 10 | 6  | 7  | 4  | 3  | 19 | 12 | 27 | 2  | 1 |
| 217 | 23 | 4  | 18 | 36 | 30 | 57 | 16 | 10 | 13 | 6  | 2 |
| 219 | 7  | 3  | 9  | 18 | 12 | 10 | 7  | 6  | 11 | 7  | 3 |
| 220 | 25 | 16 | 6  | 31 | 10 | 17 | 12 | 7  | 9  | 8  | 2 |
| 221 | 6  | 0  | 9  | 8  | 4  | 1  | 13 | 8  | 22 | 4  | 3 |
| 222 | 30 | 12 | 9  | 6  | 4  | 9  | 11 | 5  | 6  | 2  | 0 |
| 223 | 2  | 1  | 2  | 9  | 4  | 3  | 11 | 6  | 10 | 5  | 4 |
| 225 | 62 | 46 | 8  | 49 | 35 | 11 | 10 | 5  | 7  | 12 | 4 |
| 226 | 9  | 6  | 15 | 17 | 6  | 9  | 27 | 13 | 29 | 3  | 2 |
| 227 | 25 | 13 | 6  | 7  | 4  | 3  | 16 | 13 | 12 | 2  | 1 |
| 228 | 6  | 3  | 10 | 28 | 20 | 19 | 14 | 9  | 11 | 11 | 7 |
| 229 | 8  | 6  | 3  | 14 | 9  | 1  | 6  | 1  | 5  | 10 | 7 |
| 231 | 12 | 5  | 16 | 33 | 25 | 12 | 10 | 6  | 3  | 10 | 2 |
| 232 | 12 | 8  | 16 | 10 | 5  | 3  | 15 | 4  | 4  | 2  | 1 |
| 233 | 32 | 10 | 13 | 14 | 7  | 5  | 9  | 3  | 5  | 2  | 1 |
| 234 | 19 | 10 | 10 | 43 | 36 | 14 | 9  | 4  | 19 | 6  | 3 |
| 235 | 24 | 20 | 25 | 41 | 13 | 1  | 7  | 2  | 3  | 15 | 9 |
| 236 | 11 | 3  | 2  | 14 | 3  | 5  | 12 | 4  | 6  | 8  | 3 |
| 237 | 11 | 7  | 6  | 9  | 4  | 6  | 21 | 7  | 6  | 2  | 0 |
| 239 | 14 | 10 | 11 | 24 | 10 | 15 | 9  | 6  | 14 | 5  | 1 |
| 240 | 9  | 6  | 2  | 7  | 3  | 4  | 8  | 5  | 6  | 5  | 3 |
| 241 | 4  | 0  | 2  | 13 | 5  | 7  | 10 | 3  | 4  | 5  | 2 |
| 242 | 13 | 11 | 8  | 16 | 3  | 4  | 16 | 3  | 5  | 4  | 2 |
| 243 | 13 | 6  | 10 | 3  | 1  | 3  | 9  | 5  | 4  | 1  | 0 |
| 245 | 11 | 3  | 8  | 21 | 16 | 14 | 8  | 4  | 13 | 4  | 2 |
| 246 | 29 | 12 | 10 | 27 | 13 | 7  | 15 | 8  | 11 | 8  | 6 |

|     |    |    |    |    |    |    |    |    |    |    |    |
|-----|----|----|----|----|----|----|----|----|----|----|----|
| 247 | 8  | 1  | 2  | 9  | 0  | 3  | 12 | 0  | 1  | 11 | 3  |
| 248 | 31 | 19 | 9  | 21 | 11 | 18 | 16 | 7  | 9  | 8  | 2  |
| 249 | 7  | 3  | 3  | 4  | 2  | 6  | 14 | 6  | 4  | 1  | 0  |
| 250 | 5  | 2  | 2  | 7  | 3  | 6  | 17 | 11 | 7  | 13 | 8  |
| 251 | 9  | 6  | 14 | 12 | 7  | 6  | 3  | 2  | 7  | 5  | 3  |
| 252 | 12 | 7  | 9  | 7  | 1  | 5  | 9  | 4  | 2  | 5  | 1  |
| 253 | 28 | 3  | 44 | 20 | 17 | 5  | 21 | 15 | 30 | 7  | 6  |
| 254 | 11 | 3  | 0  | 2  | 1  | 1  | 10 | 5  | 6  | 4  | 3  |
| 255 | 9  | 5  | 2  | 8  | 3  | 12 | 11 | 5  | 16 | 13 | 10 |
| 256 | 26 | 18 | 14 | 73 | 68 | 77 | 3  | 1  | 11 | 6  | 3  |
| 258 | 11 | 6  | 6  | 13 | 4  | 5  | 11 | 6  | 3  | 7  | 4  |
| 259 | 25 | 19 | 35 | 21 | 7  | 9  | 27 | 11 | 26 | 2  | 1  |
| 260 | 35 | 19 | 26 | 10 | 9  | 7  | 7  | 3  | 9  | 1  | 0  |
| 261 | 19 | 13 | 8  | 22 | 12 | 4  | 12 | 9  | 21 | 8  | 4  |
| 262 | 4  | 2  | 2  | 8  | 5  | 5  | 1  | 0  | 9  | 4  | 2  |
| 263 | 10 | 5  | 3  | 13 | 5  | 4  | 8  | 5  | 8  | 9  | 4  |
| 264 | 24 | 14 | 10 | 30 | 13 | 6  | 19 | 6  | 41 | 2  | 1  |
| 266 | 17 | 13 | 11 | 33 | 17 | 7  | 13 | 8  | 9  | 13 | 8  |
| 267 | 34 | 27 | 32 | 15 | 10 | 40 | 21 | 13 | 13 | 24 | 8  |
| 268 | 9  | 5  | 6  | 23 | 15 | 7  | 10 | 3  | 5  | 11 | 4  |
| 287 | 5  | 3  | 4  | 90 | 39 | 32 | 13 | 3  | 12 | 3  | 1  |
| 288 | 7  | 5  | 6  | 6  | 3  | 3  | 10 | 8  | 10 | 2  | 1  |
| 289 | 7  | 2  | 5  | 13 | 7  | 5  | 10 | 6  | 7  | 7  | 3  |
| 290 | 11 | 6  | 6  | 20 | 14 | 7  | 4  | 1  | 3  | 7  | 5  |
| 291 | 16 | 9  | 21 | 17 | 9  | 8  | 14 | 6  | 2  | 8  | 3  |
| 292 | 10 | 6  | 5  | 9  | 3  | 3  | 18 | 4  | 10 | 2  | 0  |
| 293 | 9  | 7  | 2  | 3  | 2  | 2  | 5  | 3  | 4  | 3  | 2  |
| 294 | 4  | 1  | 2  | 9  | 1  | 2  | 7  | 4  | 1  | 5  | 4  |
| 295 | 20 | 12 | 24 | 37 | 27 | 16 | 12 | 11 | 14 | 7  | 4  |
| 296 | 9  | 2  | 2  | 14 | 4  | 8  | 14 | 5  | 2  | 9  | 4  |
| 297 | 4  | 1  | 3  | 5  | 1  | 3  | 16 | 5  | 24 | 4  | 2  |
| 298 | 19 | 12 | 3  | 4  | 2  | 14 | 9  | 2  | 2  | 1  | 0  |
| 299 | 12 | 8  | 9  | 15 | 8  | 27 | 9  | 6  | 13 | 5  | 3  |
| 300 | 34 | 4  | 11 | 46 | 10 | 5  | 13 | 8  | 8  | 11 | 10 |
| 302 | 33 | 8  | 6  | 20 | 5  | 5  | 22 | 11 | 5  | 6  | 3  |
| 303 | 17 | 14 | 14 | 1  | 0  | 2  | 16 | 5  | 6  | 2  | 1  |
| 304 | 7  | 2  | 7  | 8  | 3  | 5  | 7  | 3  | 5  | 11 | 8  |
| 305 | 25 | 7  | 1  | 20 | 12 | 12 | 10 | 9  | 6  | 5  | 2  |
| 306 | 12 | 8  | 9  | 10 | 4  | 7  | 10 | 3  | 4  | 6  | 1  |
| 307 | 16 | 9  | 18 | 5  | 1  | 0  | 12 | 6  | 19 | 1  | 0  |
| 308 | 12 | 4  | 34 | 3  | 1  | 3  | 4  | 1  | 8  | 2  | 1  |
| 309 | 5  | 2  | 2  | 8  | 5  | 3  | 14 | 8  | 13 | 13 | 10 |
| 310 | 14 | 12 | 1  | 20 | 11 | 3  | 1  | 0  | 2  | 7  | 4  |
| 315 | 21 | 10 | 12 | 5  | 4  | 2  | 16 | 13 | 14 | 2  | 1  |
| 318 | 19 | 13 | 7  | 49 | 29 | 9  | 2  | 1  | 2  | 8  | 5  |
| 319 | 12 | 5  | 13 | 34 | 17 | 9  | 11 | 5  | 4  | 6  | 2  |
| 320 | 14 | 8  | 15 | 32 | 19 | 12 | 19 | 4  | 15 | 2  | 0  |
| 321 | 5  | 1  | 4  | 3  | 2  | 1  | 5  | 4  | 23 | 1  | 0  |
| 322 | 5  | 2  | 4  | 7  | 2  | 3  | 10 | 7  | 7  | 7  | 4  |
| 323 | 17 | 6  | 6  | 30 | 19 | 6  | 6  | 3  | 3  | 8  | 6  |

|     |     |    |     |       |      |      |     |    |     |    |    |
|-----|-----|----|-----|-------|------|------|-----|----|-----|----|----|
| 324 | 13  | 8  | 14  | 22    | 15   | 12   | 10  | 4  | 15  | 5  | 1  |
| 325 | 17  | 12 | 5   | 7     | 4    | 6    | 23  | 7  | 19  | 2  | 1  |
| 326 | 4   | 2  | 2   | 3     | 2    | 1    | 6   | 4  | 16  | 2  | 1  |
| 327 | 5   | 1  | 3   | 8     | 4    | 2    | 12  | 7  | 4   | 9  | 6  |
| 328 | 16  | 11 | 14  | 32    | 12   | 1    | 7   | 3  | 19  | 7  | 3  |
| 329 | 44  | 36 | 10  | 47    | 16   | 5    | 25  | 10 | 14  | 19 | 5  |
| 330 | 11  | 7  | 7   | 10    | 4    | 3    | 18  | 6  | 7   | 3  | 1  |
| 331 | 17  | 9  | 13  | 4     | 3    | 2    | 10  | 5  | 5   | 2  | 1  |
| 332 | 5   | 1  | 2   | 10    | 3    | 7    | 8   | 4  | 5   | 5  | 2  |
| 333 | 18  | 11 | 10  | 20    | 9    | 11   | 7   | 5  | 11  | 11 | 7  |
| 334 | 18  | 5  | 8   | 18    | 8    | 5    | 11  | 3  | 3   | 9  | 2  |
| 335 | 10  | 7  | 9   | 7     | 4    | 3    | 13  | 2  | 4   | 3  | 1  |
| 359 | 10  | 4  | 4   | 3     | 1    | 8    | 11  | 4  | 5   | 3  | 2  |
| 360 | 11  | 6  | 3   | 9     | 4    | 21   | 9   | 7  | 12  | 4  | 2  |
| 361 | 52  | 24 | 33  | 51    | 14   | 20   | 26  | 15 | 21  | 8  | 6  |
| 362 | 46  | 20 | 18  | 580   | 60   | 11   | 19  | 10 | 19  | 9  | 1  |
| 363 | 17  | 8  | 11  | 13    | 2    | 12   | 18  | 6  | 22  | 6  | 3  |
| 364 | 355 | 49 | 236 | 239   | 117  | 208  | 356 | 56 | 166 | 4  | 2  |
| 365 | 35  | 10 | 37  | 20    | 13   | 20   | 9   | 7  | 3   | 13 | 11 |
| 366 | 6   | 3  | 8   | 19    | 7    | 11   | 8   | 6  | 11  | 4  | 3  |
| 368 | 24  | 10 | 19  | 14    | 5    | 7    | 27  | 19 | 7   | 6  | 3  |
| 369 | 11  | 3  | 9   | 2     | 1    | 3    | 12  | 7  | 14  | 3  | 2  |
| 371 | 27  | 11 | 9   | 16    | 4    | 10   | 14  | 8  | 11  | 10 | 5  |
| 372 | 53  | 36 | 25  | 18191 | 6621 | 2619 | 27  | 25 | 51  | 17 | 12 |
| 373 | 17  | 9  | 13  | 24    | 13   | 10   | 14  | 9  | 7   | 8  | 2  |
| 374 | 16  | 5  | 12  | 10    | 3    | 2    | 17  | 10 | 10  | 2  | 0  |
| 375 | 13  | 6  | 22  | 4     | 3    | 2    | 5   | 3  | 15  | 4  | 3  |
| 376 | 4   | 2  | 3   | 6     | 2    | 3    | 10  | 5  | 5   | 11 | 9  |
| 377 | 8   | 1  | 2   | 8     | 4    | 3    | 4   | 2  | 8   | 8  | 4  |
| 378 | 22  | 15 | 22  | 35    | 14   | 7    | 9   | 6  | 4   | 8  | 1  |
| 379 | 3   | 1  | 2   | 3     | 0    | 1    | 13  | 2  | 2   | 2  | 1  |
| 380 | 12  | 6  | 5   | 3     | 2    | 2    | 8   | 5  | 13  | 1  | 0  |
| 381 | 42  | 14 | 16  | 27    | 10   | 26   | 14  | 11 | 11  | 7  | 5  |
| 382 | 9   | 4  | 12  | 13    | 7    | 4    | 3   | 1  | 1   | 6  | 1  |
| 383 | 13  | 8  | 8   | 17    | 6    | 9    | 12  | 8  | 3   | 11 | 4  |
| 384 | 13  | 7  | 11  | 6     | 3    | 5    | 19  | 5  | 10  | 2  | 1  |
| 386 | 33  | 9  | 18  | 50    | 36   | 12   | 10  | 7  | 15  | 3  | 1  |
| 387 | 19  | 12 | 8   | 19    | 12   | 17   | 9   | 7  | 9   | 4  | 2  |
| 388 | 30  | 19 | 8   | 35    | 5    | 6    | 12  | 2  | 4   | 6  | 1  |
| 389 | 16  | 7  | 9   | 17    | 4    | 5    | 12  | 2  | 5   | 2  | 1  |
| 390 | 3   | 2  | 1   | 2     | 1    | 1    | 5   | 3  | 6   | 3  | 1  |
| 392 | 61  | 36 | 66  | 1237  | 225  | 109  | 41  | 35 | 10  | 11 | 8  |
| 394 | 10  | 4  | 15  | 11    | 3    | 8    | 8   | 1  | 2   | 6  | 2  |
| 395 | 4   | 2  | 7   | 13    | 7    | 4    | 14  | 4  | 13  | 4  | 2  |
| 396 | 35  | 9  | 13  | 22    | 8    | 13   | 23  | 7  | 9   | 4  | 2  |
| 397 | 57  | 28 | 33  | 38    | 21   | 21   | 48  | 45 | 44  | 7  | 4  |
| 398 | 96  | 31 | 46  | 104   | 8    | 9    | 87  | 78 | 38  | 41 | 37 |
| 399 | 19  | 7  | 14  | 21    | 3    | 6    | 12  | 3  | 7   | 9  | 2  |
| 401 | 5   | 2  | 4   | 2     | 1    | 4    | 15  | 11 | 5   | 3  | 2  |
| 402 | 10  | 3  | 1   | 20    | 11   | 15   | 5   | 2  | 8   | 9  | 6  |

|     |     |    |    |      |      |      |     |     |     |     |    |
|-----|-----|----|----|------|------|------|-----|-----|-----|-----|----|
| 403 | 7   | 4  | 7  | 13   | 6    | 7    | 4   | 3   | 11  | 5   | 3  |
| 419 | 13  | 7  | 3  | 14   | 6    | 4    | 8   | 5   | 2   | 10  | 8  |
| 420 | 17  | 10 | 7  | 7    | 3    | 6    | 12  | 5   | 13  | 2   | 1  |
| 423 | 32  | 12 | 7  | 38   | 9    | 3    | 4   | 3   | 9   | 7   | 4  |
| 425 | 31  | 20 | 13 | 47   | 19   | 6    | 11  | 4   | 4   | 7   | 3  |
| 426 | 8   | 3  | 20 | 8    | 5    | 1    | 18  | 11  | 26  | 2   | 1  |
| 428 | 10  | 5  | 4  | 14   | 3    | 4    | 13  | 6   | 5   | 11  | 6  |
| 429 | 11  | 4  | 5  | 17   | 8    | 11   | 4   | 3   | 3   | 7   | 3  |
| 431 | 5   | 2  | 5  | 12   | 4    | 27   | 20  | 4   | 17  | 2   | 1  |
| 432 | 12  | 5  | 4  | 3    | 1    | 0    | 7   | 4   | 11  | 2   | 1  |
| 433 | 8   | 2  | 3  | 12   | 6    | 4    | 13  | 5   | 3   | 11  | 8  |
| 434 | 7   | 2  | 8  | 15   | 8    | 11   | 8   | 4   | 13  | 5   | 3  |
| 435 | 26  | 20 | 3  | 27   | 5    | 8    | 17  | 10  | 8   | 6   | 1  |
| 436 | 15  | 11 | 11 | 8    | 4    | 7    | 9   | 1   | 4   | 2   | 0  |
| 437 | 41  | 20 | 41 | 65   | 9    | 40   | 48  | 34  | 34  | 3   | 0  |
| 479 | 6   | 2  | 4  | 14   | 8    | 8    | 9   | 6   | 9   | 7   | 5  |
| 480 | 72  | 48 | 41 | 231  | 68   | 9    | 101 | 77  | 73  | 53  | 51 |
| 481 | 256 | 96 | 40 | 249  | 42   | 4    | 140 | 112 | 59  | 138 | 45 |
| 483 | 32  | 15 | 9  | 17   | 13   | 10   | 20  | 8   | 34  | 2   | 0  |
| 492 | 4   | 2  | 5  | 2    | 1    | 1    | 8   | 5   | 1   | 3   | 2  |
| 493 | 5   | 3  | 3  | 6    | 1    | 2    | 5   | 3   | 12  | 3   | 2  |
| 495 | 8   | 3  | 2  | 11   | 1    | 3    | 9   | 6   | 4   | 3   | 2  |
| 496 | 16  | 6  | 7  | 21   | 9    | 17   | 18  | 7   | 7   | 7   | 2  |
| 497 | 51  | 18 | 38 | 4202 | 1175 | 2999 | 40  | 6   | 57  | 9   | 5  |
| 498 | 6   | 3  | 2  | 1    | 0    | 0    | 7   | 3   | 8   | 1   | 0  |
| 499 | 10  | 3  | 4  | 8    | 1    | 8    | 4   | 2   | 10  | 9   | 5  |
| 501 | 4   | 2  | 3  | 11   | 4    | 6    | 3   | 2   | 9   | 3   | 2  |
| 502 | 8   | 3  | 4  | 27   | 11   | 11   | 9   | 5   | 7   | 5   | 2  |
| 503 | 6   | 2  | 4  | 4    | 1    | 2    | 12  | 8   | 8   | 1   | 0  |
| 504 | 3   | 0  | 3  | 1    | 0    | 1    | 14  | 9   | 10  | 3   | 2  |
| 505 | 8   | 3  | 2  | 20   | 5    | 14   | 12  | 8   | 7   | 10  | 6  |
| 506 | 67  | 21 | 52 | 203  | 55   | 20   | 34  | 26  | 102 | 35  | 16 |
| 527 | 13  | 6  | 4  | 13   | 5    | 4    | 9   | 5   | 4   | 5   | 1  |
| 528 | 11  | 3  | 5  | 8    | 2    | 10   | 15  | 4   | 8   | 2   | 1  |
| 529 | 6   | 2  | 0  | 2    | 1    | 0    | 6   | 3   | 11  | 2   | 1  |
| 530 | 15  | 4  | 3  | 19   | 4    | 5    | 9   | 4   | 9   | 5   | 4  |
| 531 | 20  | 14 | 6  | 24   | 13   | 3    | 9   | 8   | 13  | 7   | 3  |
| 534 | 17  | 2  | 5  | 5    | 2    | 3    | 9   | 5   | 16  | 3   | 2  |
| 535 | 6   | 1  | 1  | 10   | 2    | 1    | 12  | 6   | 4   | 7   | 5  |
| 536 | 14  | 10 | 7  | 26   | 14   | 12   | 6   | 4   | 12  | 5   | 2  |
| 537 | 15  | 5  | 6  | 20   | 2    | 4    | 7   | 4   | 1   | 9   | 3  |
| 538 | 6   | 3  | 10 | 7    | 4    | 3    | 14  | 3   | 3   | 2   | 1  |
| 539 | 3   | 2  | 2  | 3    | 1    | 1    | 4   | 2   | 7   | 1   | 0  |
| 540 | 5   | 3  | 5  | 9    | 5    | 9    | 7   | 4   | 4   | 10  | 6  |
| 541 | 7   | 4  | 4  | 20   | 10   | 3    | 15  | 12  | 11  | 5   | 3  |
| 542 | 16  | 7  | 3  | 14   | 6    | 4    | 12  | 4   | 5   | 8   | 2  |
| 625 | 19  | 11 | 3  | 12   | 3    | 7    | 7   | 4   | 12  | 6   | 5  |
| 627 | 37  | 9  | 7  | 31   | 3    | 9    | 27  | 8   | 12  | 14  | 2  |
| 800 | 11  | 7  | 10 | 8    | 5    | 8    | 10  | 5   | 6   | 3   | 2  |
| 801 | 20  | 7  | 7  | 33   | 9    | 8    | 6   | 3   | 11  | 7   | 5  |

|      |    |    |    |      |      |     |     |     |     |    |    |
|------|----|----|----|------|------|-----|-----|-----|-----|----|----|
| 900  | 7  | 3  | 1  | 23   | 11   | 2   | 10  | 6   | 3   | 4  | 2  |
| 1001 | 5  | 1  | 9  | 15   | 5    | 4   | 5   | 1   | 3   | 7  | 5  |
| 1002 | 10 | 4  | 5  | 18   | 2    | 6   | 15  | 11  | 13  | 3  | 1  |
| 1003 | 18 | 8  | 12 | 19   | 6    | 5   | 13  | 5   | 2   | 4  | 0  |
| 1004 | 7  | 5  | 2  | 99   | 27   | 27  | 11  | 1   | 1   | 5  | 2  |
| 1005 | 4  | 2  | 3  | 2    | 1    | 1   | 9   | 5   | 5   | 2  | 1  |
| 1006 | 7  | 3  | 3  | 13   | 4    | 3   | 6   | 4   | 3   | 7  | 6  |
| 1007 | 7  | 4  | 4  | 13   | 5    | 5   | 12  | 9   | 9   | 9  | 7  |
| 1008 | 19 | 8  | 3  | 23   | 3    | 2   | 9   | 2   | 3   | 6  | 3  |
| 1009 | 11 | 4  | 19 | 7    | 4    | 2   | 11  | 5   | 26  | 2  | 1  |
| 1010 | 5  | 3  | 3  | 2    | 1    | 0   | 8   | 5   | 7   | 2  | 1  |
| 1011 | 5  | 2  | 3  | 9    | 6    | 4   | 3   | 2   | 4   | 7  | 5  |
| 1012 | 12 | 6  | 2  | 20   | 7    | 15  | 5   | 3   | 10  | 4  | 2  |
| 1013 | 16 | 7  | 12 | 14   | 4    | 2   | 16  | 10  | 5   | 5  | 3  |
| 1014 | 6  | 3  | 1  | 5    | 3    | 2   | 9   | 3   | 4   | 2  | 1  |
| 1015 | 4  | 2  | 30 | 2    | 1    | 1   | 9   | 7   | 4   | 3  | 2  |
| 1016 | 9  | 3  | 5  | 58   | 23   | 26  | 3   | 2   | 4   | 9  | 4  |
| 1017 | 8  | 2  | 4  | 13   | 3    | 3   | 11  | 7   | 4   | 3  | 1  |
| 1018 | 11 | 7  | 2  | 13   | 5    | 3   | 7   | 3   | 7   | 5  | 2  |
| 1019 | 5  | 1  | 2  | 4    | 1    | 1   | 12  | 2   | 1   | 1  | 0  |
| 1020 | 1  | 0  | 1  | 3    | 1    | 1   | 6   | 3   | 6   | 3  | 2  |
| 1021 | 7  | 2  | 2  | 818  | 134  | 25  | 3   | 1   | 4   | 11 | 5  |
| 1022 | 7  | 3  | 4  | 13   | 4    | 5   | 12  | 6   | 2   | 3  | 0  |
| 1023 | 15 | 7  | 5  | 12   | 4    | 6   | 10  | 5   | 1   | 6  | 1  |
| 1024 | 6  | 2  | 3  | 8    | 3    | 2   | 13  | 4   | 20  | 1  | 0  |
| 1025 | 2  | 0  | 3  | 2    | 0    | 14  | 3   | 1   | 3   | 3  | 2  |
| 1026 | 8  | 4  | 2  | 8    | 1    | 7   | 4   | 3   | 9   | 9  | 6  |
| 1027 | 12 | 9  | 6  | 38   | 3    | 10  | 11  | 7   | 12  | 3  | 0  |
| 1201 | 13 | 8  | 1  | 12   | 2    | 3   | 8   | 4   | 3   | 4  | 2  |
| 1202 | 5  | 2  | 7  | 4    | 2    | 3   | 12  | 3   | 2   | 1  | 0  |
| 1203 | 2  | 0  | 1  | 2    | 1    | 1   | 4   | 3   | 4   | 3  | 2  |
| 1204 | 6  | 3  | 4  | 21   | 6    | 5   | 3   | 1   | 3   | 8  | 5  |
| 1205 | 6  | 1  | 6  | 25   | 10   | 3   | 9   | 7   | 11  | 7  | 2  |
| 1206 | 18 | 4  | 2  | 37   | 21   | 17  | 11  | 4   | 0   | 4  | 1  |
| 1207 | 3  | 1  | 2  | 6    | 3    | 2   | 14  | 6   | 13  | 1  | 0  |
| 1208 | 6  | 2  | 3  | 42   | 14   | 18  | 7   | 5   | 6   | 4  | 2  |
| 1209 | 5  | 2  | 5  | 13   | 6    | 5   | 4   | 1   | 2   | 6  | 4  |
| 1210 | 9  | 3  | 1  | 13   | 5    | 5   | 13  | 10  | 7   | 8  | 6  |
| 1211 | 19 | 9  | 5  | 13   | 3    | 6   | 9   | 4   | 5   | 6  | 5  |
| 1212 | 3  | 1  | 5  | 21   | 7    | 8   | 6   | 0   | 2   | 1  | 0  |
| 1213 | 2  | 1  | 2  | 2    | 1    | 1   | 7   | 5   | 9   | 3  | 2  |
| 1214 | 9  | 5  | 5  | 11   | 3    | 6   | 3   | 1   | 3   | 3  | 1  |
| 1215 | 9  | 2  | 6  | 22   | 10   | 7   | 8   | 3   | 6   | 8  | 6  |
| 1216 | 13 | 4  | 4  | 11   | 3    | 3   | 11  | 2   | 2   | 3  | 1  |
| 1217 | 20 | 13 | 34 | 8    | 5    | 11  | 8   | 3   | 2   | 3  | 2  |
| 1218 | 3  | 0  | 2  | 3    | 1    | 7   | 9   | 7   | 8   | 1  | 0  |
| 1219 | 8  | 3  | 3  | 18   | 9    | 3   | 4   | 3   | 5   | 10 | 5  |
| 1220 | 69 | 51 | 7  | 3228 | 1070 | 336 | 223 | 148 | 133 | 18 | 13 |
| 1221 | 13 | 7  | 4  | 7    | 3    | 4   | 8   | 5   | 8   | 5  | 3  |
| 1222 | 4  | 1  | 7  | 88   | 23   | 47  | 12  | 4   | 13  | 2  | 1  |



|      |     |    |     |      |     |      |    |    |    |    |   |
|------|-----|----|-----|------|-----|------|----|----|----|----|---|
| 1223 | 4   | 3  | 28  | 1    | 0   | 1    | 8  | 6  | 3  | 2  | 1 |
| 1224 | 10  | 3  | 4   | 9    | 2   | 7    | 3  | 2  | 3  | 6  | 3 |
| 1225 | 7   | 3  | 1   | 16   | 1   | 12   | 8  | 7  | 4  | 2  | 0 |
| 1226 | 7   | 6  | 1   | 10   | 2   | 3    | 8  | 5  | 4  | 5  | 2 |
| 1230 | 6   | 1  | 5   | 5    | 0   | 1    | 13 | 4  | 16 | 2  | 1 |
| 1231 | 2   | 0  | 0   | 2    | 1   | 1    | 5  | 3  | 9  | 3  | 2 |
| 1232 | 6   | 1  | 2   | 10   | 6   | 3    | 5  | 4  | 9  | 7  | 5 |
| 1233 | 10  | 5  | 3   | 15   | 3   | 2    | 10 | 4  | 8  | 4  | 1 |
| 1234 | 10  | 6  | 5   | 11   | 4   | 2    | 12 | 5  | 2  | 6  | 3 |
| 1238 | 5   | 1  | 6   | 13   | 6   | 2    | 3  | 2  | 7  | 7  | 4 |
| 1239 | 9   | 5  | 6   | 16   | 5   | 9    | 12 | 8  | 10 | 4  | 2 |
| 1240 | 8   | 4  | 2   | 10   | 2   | 1    | 9  | 2  | 3  | 6  | 4 |
| 1241 | 3   | 1  | 4   | 4    | 2   | 1    | 13 | 3  | 22 | 2  | 1 |
| 1401 | 3   | 1  | 2   | 2    | 1   | 1    | 5  | 3  | 2  | 1  | 0 |
| 1402 | 7   | 2  | 3   | 11   | 5   | 4    | 4  | 2  | 2  | 8  | 6 |
| 1403 | 7   | 3  | 6   | 49   | 7   | 560  | 15 | 11 | 8  | 5  | 2 |
| 1404 | 16  | 10 | 2   | 15   | 0   | 1    | 10 | 2  | 1  | 4  | 2 |
| 1405 | 7   | 5  | 7   | 10   | 2   | 7    | 8  | 3  | 1  | 1  | 0 |
| 1406 | 2   | 1  | 0   | 1    | 0   | 1    | 12 | 9  | 4  | 3  | 2 |
| 1407 | 7   | 3  | 7   | 14   | 3   | 2    | 4  | 2  | 1  | 7  | 4 |
| 1408 | 11  | 6  | 5   | 32   | 2   | 4    | 7  | 4  | 6  | 6  | 3 |
| 1409 | 16  | 6  | 2   | 16   | 3   | 5    | 9  | 3  | 4  | 2  | 0 |
| 1410 | 5   | 4  | 3   | 6    | 1   | 2    | 11 | 3  | 11 | 3  | 2 |
| 1412 | 7   | 3  | 3   | 5    | 3   | 10   | 15 | 10 | 11 | 2  | 1 |
| 1413 | 9   | 3  | 1   | 18   | 9   | 10   | 8  | 6  | 2  | 4  | 2 |
| 1416 | 18  | 8  | 7   | 1290 | 80  | 153  | 14 | 8  | 10 | 6  | 4 |
| 1418 | 13  | 6  | 14  | 20   | 6   | 5    | 9  | 1  | 5  | 4  | 2 |
| 1501 | 7   | 3  | 3   | 8    | 2   | 4    | 8  | 1  | 1  | 1  | 0 |
| 1601 | 8   | 3  | 15  | 2    | 0   | 5    | 12 | 9  | 19 | 3  | 2 |
| 1602 | 9   | 2  | 6   | 163  | 57  | 62   | 1  | 0  | 6  | 9  | 4 |
| 1603 | 13  | 8  | 22  | 17   | 3   | 2    | 9  | 4  | 7  | 3  | 1 |
| 1605 | 4   | 1  | 1   | 2    | 1   | 0    | 9  | 3  | 1  | 2  | 1 |
| 1606 | 3   | 2  | 0   | 74   | 64  | 32   | 9  | 6  | 6  | 1  | 0 |
| 1607 | 12  | 4  | 1   | 44   | 29  | 19   | 7  | 6  | 6  | 12 | 9 |
| 1608 | 9   | 1  | 5   | 49   | 8   | 12   | 15 | 10 | 6  | 4  | 1 |
| 1609 | 82  | 39 | 637 | 472  | 264 | 2362 | 41 | 38 | 10 | 12 | 5 |
| 1610 | 101 | 50 | 39  | 74   | 20  | 38   | 11 | 4  | 9  | 1  | 0 |
| 1611 | 3   | 0  | 1   | 4    | 2   | 3    | 7  | 4  | 12 | 2  | 1 |
| 1613 | 74  | 44 | 23  | 170  | 22  | 21   | 17 | 15 | 15 | 4  | 1 |
| 1614 | 21  | 9  | 19  | 101  | 9   | 11   | 37 | 21 | 19 | 9  | 5 |
| 1615 | 18  | 10 | 4   | 8    | 0   | 3    | 10 | 2  | 27 | 1  | 0 |
| 1616 | 3   | 1  | 1   | 2    | 1   | 1    | 4  | 2  | 5  | 2  | 1 |
| 1617 | 10  | 5  | 3   | 8    | 2   | 12   | 4  | 3  | 2  | 7  | 5 |
| 1618 | 10  | 5  | 6   | 23   | 4   | 2    | 13 | 9  | 9  | 4  | 1 |
| 1701 | 11  | 3  | 4   | 11   | 4   | 2    | 6  | 3  | 2  | 5  | 2 |
| 1702 | 6   | 3  | 6   | 4    | 2   | 0    | 12 | 5  | 2  | 1  | 0 |
| 1703 | 3   | 1  | 1   | 1    | 0   | 1    | 6  | 3  | 1  | 2  | 1 |
| 1705 | 31  | 4  | 15  | 66   | 13  | 17   | 4  | 3  | 3  | 8  | 5 |
| 1706 | 12  | 6  | 1   | 21   | 8   | 3    | 7  | 5  | 4  | 5  | 2 |
| 1707 | 10  | 6  | 5   | 11   | 3   | 4    | 8  | 1  | 2  | 4  | 2 |

|      |    |    |     |     |     |     |    |    |    |    |   |
|------|----|----|-----|-----|-----|-----|----|----|----|----|---|
| 1801 | 10 | 7  | 14  | 13  | 4   | 10  | 14 | 5  | 26 | 2  | 1 |
| 1802 | 3  | 1  | 0   | 1   | 0   | 1   | 5  | 3  | 3  | 3  | 2 |
| 1804 | 8  | 2  | 3   | 218 | 42  | 19  | 5  | 2  | 1  | 6  | 4 |
| 1806 | 13 | 6  | 3   | 41  | 8   | 3   | 14 | 9  | 10 | 6  | 3 |
| 1807 | 17 | 5  | 5   | 19  | 6   | 4   | 13 | 5  | 2  | 5  | 3 |
| 1808 | 5  | 3  | 16  | 13  | 4   | 9   | 14 | 9  | 13 | 5  | 3 |
| 1809 | 3  | 1  | 0   | 1   | 0   | 0   | 10 | 8  | 7  | 2  | 1 |
| 1810 | 13 | 5  | 6   | 29  | 5   | 7   | 3  | 1  | 7  | 3  | 1 |
| 2001 | 11 | 6  | 4   | 12  | 1   | 6   | 12 | 7  | 8  | 7  | 4 |
| 2002 | 10 | 3  | 0   | 11  | 2   | 3   | 13 | 3  | 3  | 4  | 2 |
| 2003 | 8  | 4  | 2   | 6   | 4   | 4   | 11 | 3  | 0  | 1  | 0 |
| 2004 | 3  | 2  | 1   | 2   | 1   | 1   | 6  | 5  | 5  | 1  | 0 |
| 2005 | 8  | 3  | 4   | 9   | 6   | 2   | 3  | 2  | 6  | 9  | 6 |
| 2006 | 14 | 8  | 173 | 56  | 12  | 9   | 11 | 6  | 3  | 4  | 2 |
| 2007 | 12 | 10 | 5   | 14  | 7   | 7   | 10 | 7  | 3  | 4  | 2 |
| 2008 | 3  | 1  | 4   | 2   | 1   | 1   | 9  | 1  | 6  | 2  | 1 |
| 2009 | 1  | 0  | 1   | 1   | 0   | 0   | 3  | 1  | 6  | 2  | 1 |
| 2010 | 11 | 6  | 15  | 11  | 2   | 9   | 4  | 2  | 4  | 10 | 7 |
| 2011 | 6  | 1  | 6   | 25  | 5   | 2   | 14 | 10 | 6  | 3  | 0 |
| 2012 | 10 | 9  | 5   | 21  | 2   | 5   | 8  | 4  | 3  | 4  | 2 |
| 2013 | 8  | 3  | 1   | 15  | 10  | 15  | 12 | 6  | 2  | 1  | 0 |
| 2101 | 1  | 0  | 1   | 51  | 29  | 41  | 3  | 1  | 5  | 1  | 0 |
| 2102 | 11 | 3  | 4   | 19  | 10  | 8   | 5  | 4  | 4  | 7  | 3 |
| 2103 | 11 | 4  | 3   | 22  | 5   | 3   | 7  | 5  | 8  | 3  | 1 |
| 2104 | 10 | 8  | 2   | 13  | 3   | 1   | 9  | 3  | 4  | 5  | 2 |
| 2105 | 23 | 15 | 591 | 756 | 193 | 114 | 12 | 7  | 1  | 4  | 2 |
| 2106 | 2  | 1  | 1   | 2   | 1   | 1   | 2  | 0  | 4  | 1  | 0 |
| 2107 | 8  | 2  | 2   | 14  | 7   | 11  | 2  | 1  | 1  | 9  | 6 |
| 2201 | 11 | 3  | 9   | 22  | 3   | 4   | 11 | 8  | 5  | 3  | 1 |
| 2202 | 14 | 10 | 2   | 14  | 4   | 6   | 13 | 7  | 2  | 5  | 2 |
| 2203 | 6  | 3  | 4   | 3   | 1   | 2   | 11 | 7  | 21 | 2  | 1 |
| 2204 | 1  | 0  | 1   | 1   | 0   | 1   | 2  | 0  | 0  | 1  | 0 |
| 2205 | 11 | 2  | 6   | 208 | 55  | 68  | 4  | 2  | 3  | 5  | 3 |
| 2206 | 13 | 1  | 7   | 17  | 4   | 17  | 14 | 8  | 5  | 4  | 1 |
| 2207 | 14 | 6  | 6   | 13  | 4   | 13  | 13 | 6  | 2  | 5  | 4 |
| 2208 | 2  | 1  | 2   | 5   | 2   | 2   | 10 | 3  | 18 | 1  | 0 |
| 2209 | 1  | 0  | 1   | 2   | 1   | 0   | 3  | 1  | 3  | 3  | 1 |
| 2210 | 11 | 4  | 6   | 19  | 7   | 9   | 4  | 2  | 1  | 6  | 4 |
| 2211 | 12 | 4  | 4   | 22  | 4   | 4   | 8  | 2  | 10 | 6  | 2 |
| 2212 | 10 | 1  | 6   | 18  | 3   | 2   | 9  | 1  | 2  | 3  | 1 |
| 3001 | 15 | 7  | 2   | 28  | 4   | 8   | 3  | 1  | 4  | 7  | 5 |
| 3301 | 17 | 6  | 2   | 29  | 3   | 3   | 7  | 1  | 7  | 7  | 4 |
| 3302 | 13 | 3  | 5   | 16  | 3   | 5   | 9  | 2  | 5  | 3  | 1 |
| 3401 | 6  | 4  | 3   | 5   | 1   | 4   | 11 | 4  | 3  | 3  | 1 |
| 9001 | 2  | 1  | 1   | 1   | 0   | 0   | 6  | 4  | 5  | 2  | 1 |
| 9002 | 11 | 4  | 271 | 19  | 15  | 5   | 3  | 1  | 4  | 5  | 2 |
| 9003 | 8  | 3  | 5   | 17  | 4   | 10  | 10 | 5  | 3  | 3  | 2 |

Supplementary Table 3.2 represents all fluorescent signals (0-65535 RFU, relative fluorescent units) for groups of mice contacted to *Escherichia coli* strain W3110

|          |     |  |  |     |  |  |     |  |  |     |  |
|----------|-----|--|--|-----|--|--|-----|--|--|-----|--|
| Mouse ID | 2.1 |  |  | 2.2 |  |  | 2.3 |  |  | 2.4 |  |
|----------|-----|--|--|-----|--|--|-----|--|--|-----|--|

| Nr  | Median | -1st Q | +3rd Q | Median | -1st Q | +3rd Q | Median | -1st Q | +3rd Q | Median | -1st Q |
|-----|--------|--------|--------|--------|--------|--------|--------|--------|--------|--------|--------|
| 001 | 48     | 14     | 17     | 31     | 6      | 7      | 5      | 4      | 2      | 17     | 8      |
| 002 | 203    | 42     | 3467   | 162    | 97     | 3948   | 42     | 32     | 19     | 62     | 19     |
| 003 | 219    | 127    | 3488   | 66     | 26     | 158    | 89     | 71     | 161    | 97     | 68     |
| 004 | 59     | 12     | 25     | 20     | 6      | 3      | 28     | 6      | 16     | 24     | 7      |
| 005 | 9      | 7      | 17     | 1      | 0      | 0      | 2      | 1      | 1      | 4      | 1      |
| 006 | 287    | 103    | 93     | 25     | 13     | 7      | 11     | 8      | 43     | 11     | 3      |
| 007 | 77     | 36     | 92     | 25     | 14     | 113    | 4      | 3      | 1      | 20     | 6      |
| 009 | 34     | 6      | 24     | 16     | 3      | 6      | 13     | 3      | 2      | 11     | 0      |
| 010 | 10     | 7      | 17     | 3      | 1      | 0      | 2      | 0      | 2      | 5      | 2      |
| 011 | 26     | 6      | 24     | 15     | 5      | 16     | 6      | 5      | 3      | 16     | 10     |
| 012 | 71     | 34     | 59     | 33     | 20     | 66     | 6      | 3      | 8      | 21     | 9      |
| 013 | 79     | 48     | 43     | 20     | 5      | 85     | 7      | 4      | 14     | 20     | 6      |
| 014 | 22     | 8      | 7      | 9      | 5      | 1      | 8      | 2      | 0      | 12     | 3      |
| 015 | 8      | 3      | 6      | 2      | 1      | 0      | 3      | 2      | 1      | 4      | 2      |
| 016 | 33     | 15     | 38     | 26     | 17     | 2      | 6      | 4      | 10     | 14     | 9      |
| 017 | 47     | 33     | 69     | 15     | 4      | 29     | 6      | 1      | 0      | 12     | 6      |
| 018 | 32     | 5      | 9      | 29     | 13     | 52     | 15     | 5      | 36     | 21     | 5      |
| 019 | 23     | 4      | 4      | 13     | 5      | 1      | 7      | 3      | 2      | 11     | 2      |
| 020 | 15     | 10     | 9      | 2      | 1      | 1      | 3      | 2      | 1      | 4      | 3      |
| 021 | 28     | 14     | 26     | 13     | 6      | 14     | 8      | 5      | 21     | 10     | 6      |
| 022 | 46     | 30     | 52     | 11     | 4      | 29     | 6      | 2      | 2      | 14     | 6      |
| 023 | 23     | 6      | 9      | 20     | 11     | 46     | 13     | 9      | 25     | 18     | 7      |
| 024 | 61     | 15     | 39     | 21     | 9      | 19     | 7      | 4      | 4      | 11     | 4      |
| 025 | 162    | 64     | 43     | 1      | 0      | 0      | 2      | 1      | 1      | 2      | 1      |
| 026 | 30     | 9      | 7      | 16     | 1      | 13     | 8      | 5      | 13     | 4      | 3      |
| 027 | 28     | 11     | 70     | 7      | 2      | 4      | 6      | 3      | 1      | 10     | 5      |
| 037 | 47     | 15     | 116    | 36     | 15     | 118    | 10     | 7      | 9      | 23     | 10     |
| 038 | 37     | 22     | 19     | 10     | 2      | 4      | 4      | 0      | 7      | 10     | 2      |
| 043 | 7      | 3      | 14     | 30     | 27     | 29     | 8      | 2      | 5      | 5      | 4      |
| 044 | 14     | 3      | 6      | 7      | 1      | 3      | 9      | 2      | 1      | 10     | 6      |
| 045 | 37     | 10     | 134    | 32     | 14     | 112    | 22     | 13     | 28     | 10     | 4      |
| 046 | 16     | 8      | 6      | 8      | 2      | 3      | 8      | 3      | 3      | 9      | 2      |
| 047 | 26     | 8      | 7      | 19     | 6      | 4      | 12     | 8      | 7      | 13     | 3      |
| 048 | 23     | 19     | 33     | 11     | 5      | 16     | 8      | 6      | 4      | 10     | 1      |
| 049 | 24     | 6      | 23     | 22     | 16     | 1649   | 4      | 3      | 1      | 8      | 1      |
| 050 | 62     | 16     | 1201   | 93     | 56     | 1445   | 6      | 1      | 9      | 14     | 6      |
| 051 | 17     | 6      | 3      | 8      | 2      | 1      | 5      | 1      | 2      | 8      | 3      |
| 052 | 2      | 1      | 16     | 1      | 0      | 1      | 2      | 1      | 1      | 5      | 2      |
| 053 | 17     | 13     | 12     | 12     | 6      | 9      | 5      | 3      | 5      | 9      | 5      |
| 054 | 38     | 3      | 1      | 21     | 8      | 2      | 5      | 2      | 2      | 16     | 8      |
| 055 | 33     | 4      | 53     | 17     | 4      | 43     | 6      | 3      | 13     | 6      | 1      |
| 071 | 123    | 10     | 24     | 32     | 10     | 9      | 9      | 3      | 6      | 10     | 2      |
| 072 | 9      | 6      | 36     | 2      | 1      | 1      | 2      | 1      | 2      | 3      | 1      |
| 073 | 14     | 9      | 10     | 7      | 3      | 2      | 5      | 4      | 3      | 5      | 0      |
| 074 | 34     | 14     | 32     | 14     | 4      | 40     | 6      | 3      | 2      | 10     | 4      |
| 075 | 116    | 42     | 72     | 47     | 31     | 102    | 9      | 5      | 15     | 16     | 6      |
| 076 | 26     | 9      | 16     | 11     | 1      | 4      | 8      | 3      | 1      | 9      | 1      |
| 077 | 14     | 9      | 34     | 9      | 5      | 5      | 2      | 1      | 1      | 5      | 2      |
| 078 | 30     | 9      | 11     | 19     | 12     | 9      | 4      | 2      | 5      | 12     | 6      |

|     |     |    |     |    |    |      |    |    |    |    |    |
|-----|-----|----|-----|----|----|------|----|----|----|----|----|
| 080 | 110 | 25 | 19  | 61 | 2  | 11   | 11 | 5  | 21 | 13 | 3  |
| 081 | 45  | 20 | 14  | 20 | 5  | 4    | 5  | 1  | 1  | 10 | 3  |
| 082 | 5   | 2  | 2   | 2  | 1  | 1    | 2  | 1  | 0  | 4  | 1  |
| 083 | 17  | 8  | 2   | 11 | 6  | 4    | 5  | 3  | 7  | 6  | 4  |
| 084 | 51  | 19 | 13  | 16 | 6  | 6    | 6  | 1  | 3  | 13 | 9  |
| 085 | 61  | 25 | 25  | 21 | 4  | 28   | 8  | 4  | 24 | 8  | 2  |
| 086 | 43  | 15 | 19  | 34 | 7  | 20   | 6  | 3  | 2  | 12 | 2  |
| 087 | 2   | 0  | 2   | 1  | 0  | 3    | 3  | 2  | 1  | 6  | 3  |
| 088 | 45  | 24 | 16  | 31 | 21 | 5    | 8  | 4  | 3  | 9  | 7  |
| 089 | 54  | 15 | 4   | 30 | 9  | 12   | 6  | 2  | 2  | 8  | 6  |
| 092 | 37  | 13 | 77  | 17 | 6  | 9    | 7  | 3  | 4  | 12 | 8  |
| 093 | 2   | 1  | 2   | 2  | 1  | 0    | 2  | 1  | 0  | 3  | 2  |
| 094 | 14  | 8  | 259 | 11 | 7  | 8    | 7  | 4  | 1  | 11 | 10 |
| 096 | 66  | 22 | 65  | 73 | 32 | 56   | 8  | 5  | 14 | 17 | 11 |
| 097 | 83  | 10 | 69  | 65 | 20 | 11   | 9  | 4  | 2  | 16 | 6  |
| 098 | 3   | 1  | 1   | 2  | 1  | 273  | 2  | 1  | 3  | 8  | 3  |
| 099 | 12  | 6  | 4   | 6  | 2  | 577  | 7  | 5  | 7  | 7  | 3  |
| 100 | 17  | 3  | 7   | 40 | 34 | 1621 | 2  | 1  | 2  | 8  | 2  |
| 101 | 78  | 49 | 539 | 52 | 28 | 695  | 10 | 5  | 14 | 10 | 2  |
| 102 | 68  | 14 | 266 | 45 | 5  | 480  | 6  | 2  | 2  | 8  | 2  |
| 103 | 4   | 2  | 1   | 2  | 1  | 0    | 5  | 4  | 1  | 8  | 1  |
| 104 | 42  | 37 | 8   | 20 | 11 | 4    | 13 | 8  | 9  | 7  | 0  |
| 105 | 115 | 16 | 11  | 31 | 18 | 13   | 3  | 1  | 1  | 13 | 4  |
| 106 | 87  | 48 | 9   | 29 | 13 | 48   | 7  | 4  | 3  | 10 | 4  |
| 107 | 220 | 4  | 9   | 33 | 5  | 4    | 4  | 2  | 4  | 8  | 2  |
| 110 | 38  | 27 | 31  | 20 | 13 | 15   | 8  | 3  | 9  | 18 | 6  |
| 111 | 20  | 12 | 17  | 9  | 2  | 19   | 3  | 1  | 2  | 10 | 2  |
| 112 | 29  | 8  | 13  | 18 | 6  | 57   | 12 | 6  | 18 | 15 | 7  |
| 113 | 67  | 29 | 15  | 34 | 6  | 9    | 4  | 1  | 3  | 8  | 2  |
| 114 | 4   | 1  | 2   | 2  | 1  | 2    | 2  | 1  | 3  | 5  | 3  |
| 115 | 8   | 2  | 7   | 8  | 4  | 2    | 11 | 3  | 4  | 7  | 4  |
| 116 | 10  | 1  | 5   | 6  | 2  | 1    | 5  | 2  | 2  | 9  | 6  |
| 117 | 17  | 3  | 21  | 12 | 4  | 24   | 7  | 3  | 13 | 6  | 1  |
| 118 | 46  | 15 | 24  | 15 | 3  | 3    | 4  | 2  | 0  | 9  | 3  |
| 119 | 3   | 0  | 0   | 2  | 1  | 0    | 2  | 1  | 2  | 5  | 2  |
| 120 | 14  | 6  | 4   | 7  | 2  | 3    | 6  | 5  | 0  | 7  | 4  |
| 121 | 18  | 8  | 22  | 6  | 2  | 8    | 5  | 2  | 1  | 9  | 5  |
| 122 | 16  | 4  | 11  | 14 | 7  | 22   | 9  | 6  | 19 | 7  | 2  |
| 123 | 14  | 3  | 5   | 8  | 1  | 2    | 3  | 1  | 1  | 6  | 2  |
| 125 | 214 | 86 | 15  | 40 | 17 | 5    | 27 | 9  | 10 | 11 | 8  |
| 126 | 20  | 5  | 2   | 12 | 4  | 2    | 9  | 6  | 2  | 12 | 7  |
| 127 | 53  | 5  | 57  | 41 | 8  | 73   | 25 | 16 | 30 | 38 | 7  |
| 128 | 63  | 15 | 14  | 44 | 2  | 10   | 22 | 10 | 4  | 36 | 3  |
| 129 | 4   | 2  | 22  | 2  | 1  | 1    | 3  | 1  | 4  | 4  | 3  |
| 130 | 15  | 11 | 3   | 21 | 3  | 3    | 7  | 3  | 6  | 14 | 10 |
| 131 | 97  | 30 | 22  | 32 | 8  | 15   | 6  | 2  | 1  | 25 | 10 |
| 132 | 21  | 4  | 20  | 16 | 2  | 19   | 8  | 4  | 1  | 8  | 3  |
| 133 | 26  | 8  | 9   | 26 | 11 | 4    | 9  | 1  | 4  | 26 | 2  |
| 134 | 2   | 1  | 0   | 2  | 1  | 116  | 4  | 3  | 4  | 11 | 6  |
| 135 | 18  | 13 | 0   | 5  | 1  | 3    | 10 | 8  | 1  | 9  | 3  |

|     |     |    |     |     |    |     |    |    |    |    |    |
|-----|-----|----|-----|-----|----|-----|----|----|----|----|----|
| 136 | 51  | 14 | 233 | 36  | 16 | 300 | 6  | 4  | 2  | 21 | 4  |
| 137 | 65  | 17 | 223 | 63  | 26 | 313 | 18 | 6  | 17 | 27 | 6  |
| 138 | 32  | 4  | 11  | 22  | 3  | 4   | 9  | 5  | 6  | 27 | 8  |
| 139 | 6   | 4  | 6   | 2   | 1  | 1   | 4  | 2  | 2  | 7  | 3  |
| 140 | 152 | 77 | 30  | 107 | 78 | 14  | 77 | 60 | 59 | 90 | 27 |
| 142 | 53  | 29 | 22  | 41  | 13 | 39  | 6  | 3  | 6  | 12 | 2  |
| 143 | 27  | 8  | 6   | 16  | 3  | 7   | 6  | 2  | 1  | 7  | 2  |
| 144 | 6   | 4  | 1   | 2   | 1  | 0   | 3  | 1  | 1  | 5  | 1  |
| 145 | 18  | 12 | 18  | 19  | 9  | 12  | 9  | 4  | 11 | 16 | 8  |
| 146 | 54  | 20 | 23  | 28  | 14 | 32  | 6  | 4  | 4  | 12 | 4  |
| 149 | 4   | 1  | 3   | 3   | 1  | 0   | 4  | 3  | 1  | 7  | 3  |
| 150 | 27  | 10 | 8   | 17  | 6  | 6   | 8  | 6  | 4  | 11 | 6  |
| 151 | 38  | 11 | 16  | 16  | 8  | 10  | 3  | 1  | 2  | 7  | 4  |
| 152 | 41  | 13 | 26  | 21  | 7  | 18  | 9  | 4  | 15 | 9  | 2  |
| 153 | 31  | 9  | 8   | 15  | 3  | 6   | 8  | 3  | 4  | 18 | 7  |
| 154 | 6   | 2  | 1   | 3   | 1  | 1   | 1  | 0  | 1  | 3  | 1  |
| 156 | 35  | 8  | 4   | 9   | 3  | 4   | 3  | 0  | 4  | 8  | 6  |
| 158 | 69  | 17 | 7   | 25  | 7  | 5   | 8  | 1  | 1  | 9  | 2  |
| 159 | 6   | 1  | 4   | 4   | 2  | 0   | 3  | 2  | 2  | 8  | 6  |
| 160 | 35  | 23 | 21  | 19  | 11 | 9   | 6  | 2  | 5  | 6  | 3  |
| 161 | 35  | 9  | 8   | 13  | 5  | 1   | 5  | 3  | 2  | 10 | 8  |
| 162 | 134 | 29 | 36  | 49  | 22 | 39  | 7  | 3  | 17 | 9  | 1  |
| 164 | 6   | 3  | 11  | 3   | 0  | 2   | 6  | 2  | 2  | 4  | 2  |
| 165 | 16  | 13 | 1   | 18  | 8  | 7   | 9  | 6  | 10 | 9  | 7  |
| 166 | 46  | 19 | 3   | 6   | 1  | 2   | 8  | 4  | 1  | 10 | 4  |
| 167 | 24  | 7  | 22  | 16  | 4  | 37  | 5  | 2  | 2  | 13 | 5  |
| 168 | 34  | 6  | 15  | 22  | 7  | 5   | 10 | 5  | 3  | 16 | 7  |
| 169 | 4   | 2  | 1   | 1   | 0  | 3   | 6  | 3  | 1  | 10 | 1  |
| 170 | 42  | 9  | 36  | 20  | 2  | 6   | 14 | 8  | 7  | 6  | 0  |
| 171 | 28  | 13 | 96  | 12  | 4  | 66  | 3  | 1  | 2  | 7  | 2  |
| 173 | 75  | 35 | 51  | 64  | 45 | 63  | 12 | 8  | 20 | 9  | 5  |
| 174 | 101 | 19 | 20  | 32  | 1  | 25  | 6  | 2  | 2  | 11 | 5  |
| 175 | 2   | 1  | 1   | 2   | 1  | 0   | 4  | 2  | 2  | 10 | 3  |
| 176 | 41  | 18 | 21  | 14  | 5  | 6   | 7  | 5  | 4  | 11 | 3  |
| 177 | 149 | 20 | 5   | 24  | 3  | 2   | 4  | 1  | 2  | 13 | 4  |
| 178 | 93  | 18 | 21  | 46  | 13 | 50  | 12 | 8  | 28 | 11 | 6  |
| 179 | 37  | 13 | 13  | 14  | 2  | 3   | 4  | 2  | 2  | 7  | 1  |
| 180 | 5   | 1  | 2   | 2   | 0  | 0   | 5  | 3  | 3  | 9  | 3  |
| 181 | 137 | 71 | 33  | 38  | 15 | 18  | 9  | 4  | 8  | 13 | 7  |
| 182 | 21  | 3  | 15  | 10  | 2  | 11  | 5  | 2  | 4  | 9  | 4  |
| 183 | 75  | 25 | 3   | 25  | 6  | 23  | 6  | 2  | 4  | 15 | 8  |
| 184 | 45  | 16 | 2   | 16  | 5  | 3   | 6  | 1  | 1  | 10 | 3  |
| 186 | 31  | 3  | 6   | 18  | 6  | 3   | 8  | 3  | 6  | 13 | 9  |
| 187 | 22  | 9  | 0   | 5   | 1  | 8   | 6  | 3  | 1  | 6  | 3  |
| 188 | 18  | 2  | 18  | 12  | 5  | 11  | 4  | 1  | 1  | 8  | 4  |
| 189 | 85  | 19 | 35  | 27  | 8  | 19  | 5  | 2  | 3  | 11 | 4  |
| 190 | 5   | 2  | 9   | 2   | 0  | 3   | 4  | 2  | 2  | 5  | 3  |
| 191 | 29  | 8  | 11  | 19  | 5  | 4   | 10 | 5  | 2  | 9  | 6  |
| 192 | 39  | 10 | 18  | 12  | 6  | 3   | 4  | 1  | 3  | 8  | 6  |
| 193 | 24  | 11 | 10  | 10  | 2  | 19  | 7  | 4  | 13 | 10 | 5  |

|     |      |     |     |     |    |    |    |    |    |     |    |
|-----|------|-----|-----|-----|----|----|----|----|----|-----|----|
| 194 | 52   | 6   | 16  | 10  | 4  | 3  | 6  | 2  | 1  | 10  | 2  |
| 195 | 8    | 2   | 1   | 4   | 1  | 0  | 4  | 2  | 1  | 7   | 5  |
| 196 | 19   | 8   | 3   | 13  | 6  | 7  | 10 | 6  | 1  | 8   | 6  |
| 197 | 22   | 3   | 8   | 6   | 1  | 2  | 8  | 4  | 1  | 5   | 3  |
| 198 | 55   | 23  | 18  | 24  | 13 | 17 | 10 | 6  | 8  | 10  | 3  |
| 199 | 23   | 11  | 3   | 7   | 0  | 1  | 3  | 0  | 2  | 8   | 1  |
| 200 | 5    | 3   | 1   | 3   | 1  | 2  | 4  | 1  | 3  | 4   | 2  |
| 201 | 46   | 24  | 26  | 16  | 2  | 6  | 8  | 2  | 3  | 11  | 8  |
| 202 | 168  | 34  | 14  | 12  | 3  | 2  | 6  | 1  | 4  | 11  | 3  |
| 203 | 45   | 17  | 42  | 29  | 11 | 55 | 15 | 9  | 22 | 15  | 9  |
| 204 | 14   | 6   | 6   | 11  | 5  | 8  | 4  | 1  | 1  | 7   | 1  |
| 205 | 6    | 3   | 7   | 5   | 2  | 21 | 6  | 2  | 2  | 14  | 6  |
| 206 | 32   | 6   | 7   | 19  | 5  | 29 | 10 | 4  | 8  | 10  | 2  |
| 207 | 52   | 18  | 10  | 34  | 12 | 35 | 4  | 2  | 1  | 13  | 1  |
| 215 | 87   | 20  | 33  | 56  | 24 | 56 | 12 | 5  | 19 | 17  | 5  |
| 216 | 1075 | 195 | 58  | 155 | 10 | 20 | 70 | 21 | 5  | 183 | 37 |
| 217 | 3    | 1   | 2   | 4   | 1  | 18 | 4  | 1  | 1  | 6   | 1  |
| 219 | 397  | 217 | 46  | 14  | 7  | 1  | 8  | 5  | 5  | 11  | 6  |
| 220 | 101  | 55  | 313 | 49  | 22 | 37 | 6  | 2  | 4  | 10  | 1  |
| 221 | 32   | 6   | 31  | 34  | 11 | 24 | 13 | 9  | 25 | 15  | 5  |
| 222 | 110  | 12  | 4   | 68  | 7  | 14 | 7  | 2  | 5  | 11  | 2  |
| 223 | 3    | 1   | 2   | 3   | 1  | 2  | 6  | 4  | 1  | 7   | 2  |
| 225 | 104  | 46  | 20  | 34  | 12 | 14 | 5  | 2  | 2  | 13  | 8  |
| 226 | 49   | 15  | 27  | 38  | 6  | 32 | 11 | 8  | 18 | 21  | 9  |
| 227 | 42   | 9   | 17  | 37  | 14 | 6  | 7  | 4  | 2  | 12  | 2  |
| 228 | 7    | 3   | 15  | 3   | 1  | 1  | 9  | 5  | 3  | 9   | 4  |
| 229 | 10   | 1   | 5   | 8   | 2  | 0  | 7  | 3  | 4  | 8   | 5  |
| 231 | 31   | 14  | 7   | 25  | 10 | 5  | 6  | 2  | 3  | 10  | 5  |
| 232 | 108  | 33  | 11  | 29  | 4  | 9  | 5  | 4  | 3  | 6   | 1  |
| 233 | 107  | 24  | 8   | 77  | 9  | 21 | 6  | 2  | 4  | 11  | 3  |
| 234 | 66   | 43  | 18  | 13  | 8  | 10 | 6  | 3  | 3  | 7   | 4  |
| 235 | 34   | 3   | 16  | 28  | 6  | 1  | 9  | 4  | 2  | 13  | 9  |
| 236 | 21   | 9   | 4   | 7   | 2  | 2  | 6  | 2  | 1  | 10  | 5  |
| 237 | 27   | 5   | 15  | 12  | 2  | 11 | 10 | 8  | 16 | 14  | 4  |
| 239 | 28   | 16  | 18  | 7   | 5  | 6  | 6  | 2  | 1  | 6   | 3  |
| 240 | 10   | 6   | 9   | 8   | 2  | 0  | 8  | 3  | 4  | 11  | 9  |
| 241 | 13   | 1   | 3   | 8   | 3  | 4  | 5  | 2  | 2  | 10  | 4  |
| 242 | 40   | 21  | 12  | 17  | 4  | 12 | 9  | 5  | 10 | 7   | 2  |
| 243 | 22   | 10  | 3   | 12  | 2  | 12 | 5  | 1  | 3  | 10  | 3  |
| 245 | 29   | 23  | 17  | 5   | 1  | 2  | 6  | 2  | 2  | 8   | 6  |
| 246 | 37   | 11  | 10  | 33  | 12 | 9  | 8  | 2  | 6  | 6   | 3  |
| 247 | 13   | 4   | 12  | 12  | 4  | 3  | 5  | 2  | 0  | 9   | 5  |
| 248 | 735  | 66  | 103 | 80  | 24 | 17 | 7  | 1  | 3  | 18  | 12 |
| 249 | 37   | 11  | 8   | 24  | 3  | 6  | 5  | 2  | 2  | 14  | 8  |
| 250 | 8    | 4   | 7   | 4   | 1  | 0  | 3  | 2  | 1  | 10  | 4  |
| 251 | 52   | 37  | 26  | 35  | 18 | 34 | 12 | 5  | 4  | 16  | 8  |
| 252 | 24   | 15  | 3   | 15  | 8  | 4  | 3  | 2  | 1  | 9   | 2  |
| 253 | 97   | 37  | 24  | 75  | 20 | 25 | 6  | 1  | 1  | 19  | 7  |
| 254 | 51   | 11  | 14  | 24  | 11 | 3  | 4  | 1  | 3  | 10  | 4  |
| 255 | 12   | 10  | 26  | 7   | 3  | 10 | 6  | 4  | 4  | 10  | 3  |

|     |     |     |    |     |    |    |    |    |    |    |    |
|-----|-----|-----|----|-----|----|----|----|----|----|----|----|
| 256 | 45  | 25  | 7  | 20  | 10 | 22 | 11 | 6  | 5  | 9  | 4  |
| 258 | 17  | 3   | 6  | 10  | 3  | 5  | 3  | 1  | 5  | 8  | 1  |
| 259 | 80  | 36  | 27 | 70  | 29 | 36 | 6  | 1  | 0  | 18 | 6  |
| 260 | 311 | 82  | 25 | 106 | 10 | 5  | 10 | 4  | 3  | 8  | 4  |
| 261 | 2   | 0   | 1  | 6   | 3  | 8  | 6  | 3  | 3  | 8  | 3  |
| 262 | 14  | 6   | 3  | 9   | 2  | 0  | 8  | 6  | 3  | 10 | 4  |
| 263 | 545 | 166 | 35 | 8   | 3  | 4  | 4  | 2  | 4  | 11 | 3  |
| 264 | 73  | 15  | 35 | 58  | 16 | 28 | 5  | 2  | 4  | 19 | 7  |
| 266 | 5   | 2   | 4  | 7   | 3  | 8  | 7  | 4  | 4  | 7  | 3  |
| 267 | 61  | 37  | 26 | 45  | 24 | 17 | 56 | 49 | 49 | 55 | 33 |
| 268 | 25  | 11  | 16 | 15  | 6  | 11 | 7  | 2  | 4  | 11 | 4  |
| 287 | 38  | 10  | 25 | 20  | 5  | 6  | 5  | 2  | 24 | 9  | 4  |
| 288 | 33  | 16  | 12 | 18  | 3  | 4  | 4  | 0  | 4  | 7  | 1  |
| 289 | 19  | 17  | 21 | 7   | 4  | 4  | 5  | 2  | 0  | 5  | 3  |
| 290 | 17  | 5   | 8  | 13  | 6  | 6  | 6  | 3  | 4  | 13 | 6  |
| 291 | 26  | 6   | 6  | 14  | 6  | 14 | 7  | 3  | 2  | 9  | 5  |
| 292 | 27  | 5   | 2  | 17  | 4  | 14 | 8  | 5  | 11 | 9  | 2  |
| 293 | 29  | 6   | 12 | 22  | 3  | 2  | 6  | 3  | 1  | 9  | 2  |
| 294 | 10  | 7   | 2  | 4   | 2  | 0  | 6  | 1  | 3  | 4  | 3  |
| 295 | 28  | 8   | 16 | 22  | 3  | 6  | 13 | 5  | 0  | 9  | 6  |
| 296 | 18  | 7   | 5  | 9   | 2  | 3  | 7  | 2  | 1  | 6  | 4  |
| 297 | 42  | 13  | 30 | 42  | 16 | 20 | 10 | 2  | 17 | 13 | 8  |
| 298 | 24  | 5   | 10 | 30  | 16 | 12 | 4  | 1  | 0  | 7  | 2  |
| 299 | 10  | 8   | 15 | 4   | 1  | 0  | 7  | 3  | 2  | 7  | 5  |
| 300 | 56  | 29  | 8  | 47  | 8  | 7  | 12 | 5  | 3  | 12 | 10 |
| 302 | 56  | 15  | 13 | 48  | 13 | 11 | 6  | 4  | 0  | 9  | 3  |
| 303 | 47  | 31  | 39 | 25  | 20 | 52 | 7  | 1  | 4  | 13 | 2  |
| 304 | 12  | 9   | 20 | 4   | 1  | 5  | 4  | 3  | 2  | 15 | 7  |
| 305 | 27  | 15  | 10 | 24  | 15 | 5  | 12 | 5  | 5  | 12 | 4  |
| 306 | 17  | 4   | 12 | 12  | 3  | 2  | 4  | 1  | 2  | 6  | 2  |
| 307 | 27  | 7   | 16 | 18  | 3  | 25 | 6  | 1  | 13 | 12 | 3  |
| 308 | 62  | 10  | 10 | 47  | 7  | 23 | 11 | 1  | 5  | 17 | 5  |
| 309 | 6   | 3   | 5  | 3   | 0  | 1  | 5  | 3  | 2  | 10 | 1  |
| 310 | 19  | 3   | 5  | 14  | 5  | 3  | 7  | 3  | 2  | 9  | 5  |
| 315 | 52  | 2   | 12 | 47  | 4  | 10 | 22 | 8  | 9  | 31 | 5  |
| 318 | 37  | 2   | 10 | 21  | 4  | 2  | 15 | 6  | 9  | 7  | 3  |
| 319 | 35  | 15  | 2  | 13  | 4  | 4  | 4  | 1  | 3  | 9  | 2  |
| 320 | 90  | 13  | 4  | 32  | 12 | 4  | 4  | 2  | 7  | 14 | 5  |
| 321 | 27  | 7   | 14 | 21  | 6  | 5  | 6  | 2  | 1  | 8  | 4  |
| 322 | 6   | 2   | 8  | 4   | 2  | 0  | 5  | 1  | 3  | 8  | 5  |
| 323 | 46  | 15  | 3  | 31  | 13 | 5  | 8  | 2  | 3  | 6  | 2  |
| 324 | 42  | 10  | 14 | 29  | 11 | 5  | 6  | 3  | 4  | 8  | 3  |
| 325 | 41  | 3   | 9  | 35  | 10 | 16 | 17 | 8  | 25 | 37 | 10 |
| 326 | 29  | 2   | 4  | 26  | 6  | 3  | 12 | 3  | 4  | 26 | 3  |
| 327 | 6   | 4   | 6  | 6   | 2  | 1  | 6  | 3  | 4  | 14 | 12 |
| 328 | 37  | 13  | 6  | 29  | 10 | 3  | 21 | 7  | 3  | 20 | 8  |
| 329 | 68  | 21  | 6  | 44  | 12 | 9  | 26 | 8  | 5  | 45 | 17 |
| 330 | 38  | 6   | 14 | 28  | 2  | 21 | 17 | 4  | 20 | 30 | 9  |
| 331 | 48  | 7   | 5  | 37  | 18 | 9  | 8  | 2  | 4  | 9  | 1  |
| 332 | 11  | 8   | 8  | 3   | 1  | 3  | 6  | 2  | 2  | 5  | 3  |

|     |      |     |    |      |    |    |      |     |     |      |     |
|-----|------|-----|----|------|----|----|------|-----|-----|------|-----|
| 333 | 45   | 5   | 24 | 19   | 3  | 3  | 10   | 3   | 9   | 8    | 6   |
| 334 | 30   | 13  | 9  | 17   | 5  | 7  | 8    | 2   | 1   | 16   | 6   |
| 335 | 104  | 12  | 19 | 18   | 5  | 7  | 11   | 6   | 12  | 6    | 1   |
| 359 | 30   | 6   | 10 | 28   | 13 | 6  | 7    | 2   | 6   | 12   | 3   |
| 360 | 5    | 2   | 3  | 6    | 3  | 2  | 6    | 1   | 2   | 9    | 7   |
| 361 | 198  | 115 | 12 | 55   | 9  | 8  | 23   | 8   | 2   | 68   | 46  |
| 362 | 182  | 5   | 2  | 80   | 7  | 11 | 12   | 5   | 8   | 25   | 13  |
| 363 | 371  | 67  | 54 | 36   | 9  | 17 | 13   | 4   | 33  | 15   | 4   |
| 364 | 1194 | 49  | 24 | 1263 | 52 | 68 | 1085 | 220 | 152 | 1175 | 100 |
| 365 | 24   | 16  | 20 | 18   | 9  | 12 | 1    | 0   | 5   | 7    | 1   |
| 366 | 24   | 6   | 8  | 17   | 4  | 6  | 8    | 3   | 1   | 9    | 2   |
| 368 | 162  | 30  | 14 | 42   | 11 | 14 | 6    | 2   | 2   | 13   | 7   |
| 369 | 58   | 14  | 47 | 58   | 9  | 11 | 101  | 45  | 21  | 32   | 6   |
| 371 | 6    | 3   | 19 | 8    | 4  | 9  | 5    | 2   | 5   | 7    | 1   |
| 372 | 180  | 71  | 21 | 129  | 22 | 16 | 29   | 19  | 32  | 73   | 16  |
| 373 | 34   | 11  | 3  | 23   | 13 | 5  | 5    | 3   | 0   | 11   | 2   |
| 374 | 51   | 19  | 20 | 26   | 9  | 23 | 5    | 1   | 22  | 13   | 7   |
| 375 | 25   | 7   | 21 | 27   | 9  | 5  | 7    | 3   | 2   | 8    | 3   |
| 376 | 5    | 2   | 3  | 6    | 4  | 1  | 4    | 3   | 3   | 6    | 2   |
| 377 | 10   | 1   | 5  | 9    | 4  | 3  | 8    | 4   | 2   | 10   | 6   |
| 378 | 32   | 8   | 10 | 24   | 11 | 4  | 4    | 1   | 1   | 14   | 6   |
| 379 | 17   | 3   | 5  | 11   | 6  | 7  | 6    | 2   | 3   | 8    | 3   |
| 380 | 83   | 23  | 11 | 35   | 13 | 7  | 7    | 3   | 2   | 13   | 5   |
| 381 | 33   | 17  | 10 | 8    | 2  | 18 | 7    | 4   | 2   | 8    | 0   |
| 382 | 13   | 4   | 7  | 11   | 3  | 2  | 9    | 4   | 3   | 5    | 1   |
| 383 | 28   | 4   | 2  | 22   | 4  | 5  | 8    | 3   | 5   | 17   | 8   |
| 384 | 38   | 10  | 11 | 32   | 4  | 8  | 9    | 4   | 11  | 18   | 4   |
| 386 | 46   | 41  | 32 | 19   | 6  | 11 | 6    | 1   | 1   | 5    | 3   |
| 387 | 50   | 12  | 12 | 23   | 2  | 5  | 12   | 4   | 8   | 12   | 10  |
| 388 | 51   | 13  | 4  | 31   | 7  | 4  | 4    | 1   | 1   | 10   | 4   |
| 389 | 82   | 12  | 12 | 42   | 18 | 11 | 11   | 6   | 17  | 15   | 5   |
| 390 | 20   | 4   | 2  | 9    | 2  | 2  | 6    | 1   | 1   | 8    | 2   |
| 392 | 168  | 33  | 10 | 152  | 28 | 11 | 13   | 3   | 11  | 49   | 32  |
| 394 | 20   | 9   | 4  | 6    | 0  | 1  | 5    | 1   | 2   | 7    | 5   |
| 395 | 30   | 10  | 10 | 16   | 6  | 4  | 7    | 4   | 2   | 6    | 2   |
| 396 | 90   | 10  | 12 | 72   | 8  | 9  | 12   | 6   | 2   | 13   | 1   |
| 397 | 4    | 1   | 3  | 34   | 11 | 16 | 26   | 19  | 25  | 6    | 3   |
| 398 | 135  | 8   | 9  | 106  | 21 | 30 | 52   | 12  | 13  | 53   | 16  |
| 399 | 31   | 9   | 6  | 21   | 9  | 11 | 8    | 4   | 2   | 9    | 4   |
| 401 | 16   | 5   | 5  | 10   | 5  | 1  | 7    | 1   | 3   | 10   | 2   |
| 402 | 16   | 9   | 7  | 12   | 4  | 6  | 3    | 2   | 1   | 11   | 4   |
| 403 | 16   | 1   | 2  | 12   | 1  | 1  | 6    | 3   | 3   | 14   | 6   |
| 419 | 18   | 4   | 2  | 11   | 3  | 4  | 8    | 2   | 1   | 6    | 1   |
| 420 | 32   | 2   | 13 | 18   | 4  | 9  | 5    | 3   | 3   | 9    | 2   |
| 423 | 59   | 20  | 11 | 41   | 9  | 9  | 11   | 6   | 2   | 8    | 4   |
| 425 | 40   | 1   | 2  | 30   | 5  | 3  | 5    | 3   | 1   | 11   | 3   |
| 426 | 12   | 1   | 3  | 9    | 1  | 14 | 7    | 4   | 9   | 12   | 5   |
| 428 | 18   | 8   | 4  | 9    | 5  | 7  | 7    | 4   | 4   | 7    | 1   |
| 429 | 24   | 8   | 7  | 23   | 10 | 3  | 7    | 4   | 3   | 6    | 2   |
| 431 | 26   | 1   | 59 | 28   | 10 | 30 | 9    | 5   | 7   | 10   | 4   |



|      |      |     |     |     |    |    |     |    |    |     |    |
|------|------|-----|-----|-----|----|----|-----|----|----|-----|----|
| 432  | 23   | 3   | 7   | 17  | 4  | 7  | 5   | 2  | 2  | 9   | 2  |
| 433  | 10   | 2   | 1   | 4   | 2  | 1  | 6   | 2  | 1  | 6   | 3  |
| 434  | 22   | 7   | 6   | 14  | 5  | 2  | 11  | 4  | 6  | 9   | 5  |
| 435  | 43   | 5   | 7   | 28  | 3  | 6  | 8   | 3  | 4  | 16  | 5  |
| 436  | 26   | 11  | 10  | 19  | 9  | 21 | 9   | 4  | 7  | 9   | 3  |
| 437  | 249  | 23  | 11  | 241 | 4  | 8  | 122 | 29 | 25 | 151 | 10 |
| 479  | 15   | 6   | 4   | 7   | 3  | 2  | 6   | 3  | 5  | 6   | 4  |
| 480  | 1137 | 359 | 116 | 186 | 41 | 24 | 152 | 18 | 26 | 158 | 71 |
| 481  | 332  | 43  | 17  | 337 | 67 | 12 | 176 | 19 | 38 | 221 | 75 |
| 483  | 51   | 21  | 12  | 46  | 23 | 27 | 12  | 7  | 20 | 14  | 7  |
| 492  | 14   | 4   | 13  | 8   | 1  | 6  | 6   | 2  | 2  | 9   | 2  |
| 493  | 2    | 1   | 3   | 5   | 2  | 0  | 4   | 0  | 1  | 5   | 3  |
| 495  | 12   | 2   | 5   | 8   | 2  | 2  | 6   | 2  | 4  | 9   | 7  |
| 496  | 40   | 10  | 20  | 23  | 9  | 7  | 9   | 3  | 10 | 17  | 7  |
| 497  | 196  | 22  | 48  | 211 | 43 | 6  | 105 | 36 | 36 | 125 | 18 |
| 498  | 16   | 4   | 1   | 9   | 2  | 1  | 8   | 4  | 1  | 7   | 2  |
| 499  | 8    | 4   | 7   | 8   | 3  | 0  | 4   | 3  | 3  | 10  | 2  |
| 501  | 16   | 3   | 8   | 11  | 3  | 1  | 7   | 3  | 4  | 6   | 2  |
| 502  | 28   | 6   | 3   | 12  | 2  | 4  | 6   | 2  | 2  | 12  | 5  |
| 503  | 13   | 2   | 5   | 8   | 2  | 3  | 11  | 5  | 8  | 15  | 5  |
| 504  | 18   | 5   | 2   | 11  | 3  | 2  | 7   | 4  | 2  | 12  | 3  |
| 505  | 16   | 5   | 1   | 15  | 6  | 2  | 7   | 4  | 8  | 22  | 9  |
| 506  | 214  | 25  | 17  | 163 | 24 | 36 | 132 | 50 | 9  | 164 | 56 |
| 527  | 21   | 2   | 5   | 13  | 6  | 4  | 4   | 2  | 2  | 9   | 2  |
| 528  | 32   | 8   | 8   | 29  | 7  | 2  | 7   | 3  | 17 | 7   | 2  |
| 529  | 15   | 3   | 6   | 10  | 2  | 0  | 6   | 2  | 2  | 6   | 2  |
| 530  | 20   | 10  | 4   | 12  | 5  | 4  | 4   | 1  | 4  | 8   | 2  |
| 531  | 22   | 4   | 8   | 20  | 4  | 3  | 9   | 4  | 5  | 14  | 7  |
| 534  | 46   | 5   | 4   | 28  | 5  | 5  | 4   | 2  | 2  | 6   | 1  |
| 535  | 7    | 2   | 5   | 5   | 2  | 1  | 5   | 2  | 1  | 5   | 2  |
| 536  | 28   | 9   | 7   | 20  | 4  | 2  | 20  | 11 | 4  | 20  | 15 |
| 537  | 36   | 10  | 5   | 18  | 3  | 3  | 9   | 3  | 3  | 17  | 6  |
| 538  | 34   | 9   | 20  | 15  | 5  | 4  | 7   | 4  | 2  | 7   | 1  |
| 539  | 16   | 4   | 2   | 10  | 1  | 3  | 6   | 2  | 1  | 10  | 1  |
| 540  | 10   | 2   | 4   | 4   | 1  | 1  | 7   | 2  | 1  | 5   | 3  |
| 541  | 16   | 6   | 5   | 10  | 3  | 4  | 12  | 2  | 3  | 11  | 9  |
| 542  | 16   | 4   | 2   | 15  | 3  | 1  | 12  | 7  | 3  | 10  | 4  |
| 625  | 26   | 8   | 6   | 8   | 2  | 1  | 7   | 2  | 0  | 5   | 4  |
| 627  | 45   | 4   | 11  | 34  | 5  | 9  | 25  | 5  | 8  | 33  | 20 |
| 800  | 55   | 25  | 5   | 25  | 9  | 5  | 15  | 4  | 4  | 15  | 3  |
| 801  | 11   | 3   | 5   | 22  | 8  | 5  | 6   | 2  | 5  | 5   | 3  |
| 900  | 15   | 8   | 5   | 8   | 3  | 6  | 9   | 3  | 5  | 4   | 2  |
| 1001 | 8    | 2   | 2   | 6   | 3  | 2  | 5   | 2  | 3  | 5   | 3  |
| 1002 | 20   | 10  | 2   | 11  | 2  | 9  | 12  | 3  | 7  | 9   | 7  |
| 1003 | 25   | 7   | 26  | 12  | 4  | 6  | 7   | 4  | 3  | 10  | 7  |
| 1004 | 73   | 4   | 16  | 34  | 11 | 30 | 9   | 4  | 47 | 27  | 16 |
| 1005 | 18   | 2   | 5   | 12  | 3  | 4  | 11  | 3  | 2  | 14  | 3  |
| 1006 | 7    | 2   | 3   | 5   | 1  | 2  | 5   | 1  | 3  | 5   | 3  |
| 1007 | 19   | 11  | 5   | 14  | 4  | 2  | 11  | 3  | 7  | 8   | 7  |
| 1008 | 35   | 2   | 14  | 23  | 3  | 12 | 12  | 3  | 4  | 10  | 1  |

|      |     |     |    |     |    |    |    |    |    |     |    |
|------|-----|-----|----|-----|----|----|----|----|----|-----|----|
| 1009 | 16  | 5   | 16 | 10  | 1  | 26 | 9  | 4  | 31 | 8   | 3  |
| 1010 | 22  | 3   | 12 | 16  | 5  | 6  | 8  | 1  | 6  | 13  | 5  |
| 1011 | 13  | 3   | 1  | 7   | 2  | 4  | 5  | 3  | 3  | 6   | 2  |
| 1012 | 20  | 4   | 9  | 8   | 2  | 0  | 8  | 6  | 3  | 7   | 2  |
| 1013 | 23  | 5   | 9  | 25  | 6  | 8  | 9  | 5  | 4  | 21  | 7  |
| 1014 | 30  | 5   | 16 | 20  | 6  | 22 | 7  | 3  | 23 | 8   | 5  |
| 1015 | 24  | 7   | 5  | 13  | 3  | 3  | 7  | 4  | 1  | 7   | 2  |
| 1016 | 16  | 2   | 12 | 16  | 5  | 5  | 3  | 2  | 1  | 7   | 1  |
| 1017 | 19  | 6   | 5  | 10  | 2  | 5  | 7  | 5  | 2  | 12  | 8  |
| 1018 | 19  | 3   | 6  | 16  | 7  | 2  | 4  | 1  | 5  | 9   | 3  |
| 1019 | 21  | 3   | 4  | 12  | 4  | 11 | 8  | 4  | 19 | 8   | 2  |
| 1020 | 14  | 2   | 3  | 10  | 2  | 3  | 5  | 0  | 1  | 10  | 3  |
| 1021 | 407 | 118 | 91 | 5   | 2  | 3  | 4  | 2  | 5  | 10  | 5  |
| 1022 | 17  | 5   | 3  | 7   | 1  | 5  | 8  | 4  | 5  | 12  | 7  |
| 1023 | 25  | 5   | 9  | 15  | 3  | 6  | 6  | 3  | 4  | 10  | 2  |
| 1024 | 30  | 4   | 21 | 12  | 1  | 16 | 6  | 4  | 4  | 8   | 0  |
| 1025 | 23  | 3   | 40 | 12  | 3  | 21 | 6  | 2  | 5  | 7   | 2  |
| 1026 | 6   | 3   | 0  | 4   | 1  | 2  | 5  | 3  | 1  | 6   | 2  |
| 1027 | 33  | 10  | 6  | 12  | 6  | 1  | 7  | 4  | 4  | 7   | 3  |
| 1201 | 20  | 9   | 7  | 15  | 5  | 1  | 6  | 2  | 1  | 10  | 3  |
| 1202 | 23  | 4   | 5  | 13  | 4  | 11 | 8  | 5  | 27 | 10  | 4  |
| 1203 | 16  | 3   | 4  | 11  | 3  | 2  | 7  | 2  | 3  | 8   | 3  |
| 1204 | 11  | 6   | 1  | 5   | 1  | 2  | 4  | 1  | 1  | 6   | 4  |
| 1205 | 18  | 10  | 3  | 7   | 2  | 8  | 13 | 6  | 3  | 6   | 3  |
| 1206 | 35  | 11  | 16 | 19  | 5  | 7  | 8  | 3  | 0  | 9   | 5  |
| 1207 | 23  | 3   | 2  | 20  | 7  | 13 | 11 | 6  | 3  | 8   | 2  |
| 1208 | 235 | 31  | 33 | 147 | 28 | 15 | 66 | 16 | 11 | 8   | 2  |
| 1209 | 6   | 2   | 4  | 3   | 0  | 4  | 5  | 2  | 1  | 5   | 3  |
| 1210 | 14  | 5   | 2  | 9   | 3  | 7  | 12 | 7  | 3  | 6   | 2  |
| 1211 | 23  | 3   | 9  | 18  | 4  | 5  | 8  | 4  | 1  | 8   | 4  |
| 1212 | 37  | 6   | 6  | 50  | 6  | 21 | 10 | 5  | 25 | 10  | 2  |
| 1213 | 14  | 4   | 5  | 11  | 2  | 5  | 8  | 2  | 2  | 9   | 2  |
| 1214 | 9   | 4   | 2  | 5   | 1  | 4  | 5  | 0  | 2  | 4   | 2  |
| 1215 | 18  | 6   | 4  | 10  | 2  | 3  | 11 | 6  | 2  | 6   | 4  |
| 1216 | 20  | 4   | 11 | 14  | 6  | 4  | 6  | 2  | 1  | 7   | 2  |
| 1217 | 33  | 6   | 21 | 17  | 2  | 4  | 11 | 6  | 3  | 9   | 4  |
| 1218 | 22  | 4   | 20 | 16  | 4  | 15 | 14 | 5  | 3  | 12  | 4  |
| 1219 | 12  | 1   | 0  | 9   | 3  | 1  | 3  | 2  | 3  | 6   | 1  |
| 1220 | 762 | 30  | 90 | 142 | 28 | 70 | 44 | 22 | 18 | 268 | 54 |
| 1221 | 19  | 2   | 2  | 18  | 4  | 2  | 6  | 3  | 3  | 9   | 3  |
| 1222 | 21  | 5   | 45 | 8   | 3  | 2  | 10 | 6  | 18 | 11  | 5  |
| 1223 | 18  | 3   | 7  | 14  | 2  | 2  | 6  | 3  | 3  | 9   | 5  |
| 1224 | 12  | 4   | 4  | 6   | 0  | 2  | 4  | 2  | 6  | 6   | 2  |
| 1225 | 21  | 9   | 25 | 11  | 3  | 2  | 12 | 7  | 3  | 7   | 2  |
| 1226 | 26  | 7   | 6  | 15  | 1  | 2  | 5  | 2  | 2  | 8   | 2  |
| 1230 | 22  | 2   | 2  | 10  | 2  | 2  | 6  | 2  | 27 | 9   | 4  |
| 1231 | 20  | 4   | 2  | 6   | 2  | 3  | 4  | 1  | 1  | 7   | 3  |
| 1232 | 8   | 2   | 3  | 7   | 2  | 2  | 4  | 2  | 5  | 7   | 3  |
| 1233 | 18  | 4   | 5  | 10  | 2  | 3  | 8  | 5  | 4  | 8   | 3  |
| 1234 | 17  | 1   | 4  | 14  | 5  | 2  | 4  | 2  | 2  | 10  | 2  |

|      |      |    |     |     |    |     |    |    |    |    |    |
|------|------|----|-----|-----|----|-----|----|----|----|----|----|
| 1238 | 5    | 3  | 4   | 5   | 2  | 4   | 3  | 1  | 0  | 6  | 2  |
| 1239 | 13   | 3  | 1   | 14  | 2  | 1   | 9  | 5  | 2  | 10 | 7  |
| 1240 | 15   | 4  | 3   | 13  | 5  | 1   | 7  | 0  | 5  | 13 | 5  |
| 1241 | 18   | 2  | 2   | 9   | 2  | 8   | 9  | 4  | 17 | 8  | 2  |
| 1401 | 15   | 1  | 4   | 10  | 5  | 9   | 7  | 2  | 1  | 7  | 2  |
| 1402 | 7    | 4  | 1   | 5   | 2  | 1   | 4  | 2  | 2  | 6  | 3  |
| 1403 | 24   | 10 | 1   | 20  | 8  | 53  | 8  | 2  | 5  | 11 | 8  |
| 1404 | 17   | 1  | 5   | 13  | 2  | 3   | 9  | 4  | 1  | 8  | 2  |
| 1405 | 25   | 8  | 5   | 12  | 3  | 10  | 6  | 2  | 5  | 12 | 2  |
| 1406 | 15   | 4  | 5   | 9   | 3  | 3   | 7  | 2  | 1  | 10 | 2  |
| 1407 | 10   | 2  | 0   | 6   | 3  | 3   | 4  | 0  | 1  | 4  | 2  |
| 1408 | 31   | 7  | 8   | 11  | 3  | 7   | 8  | 3  | 3  | 5  | 2  |
| 1409 | 24   | 4  | 4   | 13  | 3  | 7   | 7  | 2  | 5  | 9  | 4  |
| 1410 | 37   | 13 | 22  | 10  | 2  | 11  | 10 | 3  | 18 | 8  | 2  |
| 1412 | 26   | 3  | 8   | 10  | 6  | 1   | 9  | 2  | 2  | 8  | 2  |
| 1413 | 22   | 7  | 1   | 13  | 4  | 1   | 5  | 1  | 3  | 7  | 5  |
| 1416 | 19   | 7  | 16  | 16  | 6  | 3   | 9  | 4  | 4  | 9  | 6  |
| 1418 | 28   | 4  | 2   | 18  | 6  | 7   | 6  | 2  | 4  | 9  | 2  |
| 1501 | 26   | 2  | 2   | 10  | 2  | 9   | 9  | 5  | 25 | 14 | 7  |
| 1601 | 160  | 38 | 71  | 52  | 23 | 31  | 23 | 7  | 4  | 24 | 3  |
| 1602 | 223  | 54 | 54  | 8   | 4  | 17  | 5  | 3  | 2  | 8  | 2  |
| 1603 | 24   | 5  | 1   | 13  | 3  | 9   | 10 | 6  | 2  | 10 | 3  |
| 1605 | 38   | 16 | 75  | 17  | 6  | 59  | 11 | 6  | 9  | 10 | 1  |
| 1606 | 62   | 13 | 7   | 16  | 7  | 3   | 7  | 2  | 4  | 12 | 3  |
| 1607 | 26   | 7  | 9   | 18  | 5  | 10  | 2  | 0  | 12 | 17 | 7  |
| 1608 | 19   | 2  | 3   | 22  | 6  | 3   | 9  | 4  | 4  | 13 | 6  |
| 1609 | 136  | 43 | 31  | 63  | 15 | 581 | 12 | 6  | 4  | 20 | 5  |
| 1610 | 1312 | 50 | 263 | 304 | 31 | 24  | 26 | 17 | 34 | 12 | 5  |
| 1611 | 29   | 5  | 19  | 22  | 14 | 5   | 11 | 2  | 6  | 10 | 2  |
| 1613 | 180  | 20 | 30  | 65  | 9  | 19  | 24 | 10 | 5  | 22 | 17 |
| 1614 | 78   | 4  | 4   | 58  | 12 | 19  | 11 | 4  | 5  | 30 | 6  |
| 1615 | 46   | 5  | 2   | 53  | 23 | 18  | 17 | 6  | 21 | 28 | 5  |
| 1616 | 16   | 3  | 4   | 12  | 6  | 2   | 6  | 2  | 2  | 10 | 1  |
| 1617 | 9    | 4  | 2   | 5   | 0  | 1   | 5  | 3  | 1  | 8  | 4  |
| 1618 | 18   | 6  | 4   | 9   | 1  | 5   | 8  | 1  | 3  | 11 | 6  |
| 1701 | 24   | 3  | 4   | 15  | 5  | 2   | 4  | 0  | 5  | 11 | 4  |
| 1702 | 20   | 5  | 3   | 13  | 3  | 12  | 4  | 1  | 5  | 11 | 3  |
| 1703 | 19   | 2  | 6   | 13  | 7  | 3   | 5  | 2  | 2  | 7  | 1  |
| 1705 | 22   | 6  | 9   | 25  | 9  | 7   | 3  | 1  | 3  | 7  | 3  |
| 1706 | 20   | 3  | 6   | 13  | 5  | 4   | 6  | 2  | 3  | 8  | 6  |
| 1707 | 15   | 3  | 6   | 10  | 2  | 3   | 6  | 1  | 1  | 14 | 5  |
| 1801 | 40   | 13 | 6   | 20  | 8  | 6   | 11 | 5  | 23 | 9  | 2  |
| 1802 | 16   | 5  | 4   | 11  | 5  | 2   | 6  | 3  | 3  | 9  | 1  |
| 1804 | 7    | 2  | 2   | 7   | 3  | 2   | 4  | 1  | 1  | 7  | 5  |
| 1806 | 18   | 9  | 6   | 14  | 4  | 2   | 10 | 4  | 4  | 8  | 7  |
| 1807 | 25   | 6  | 1   | 15  | 4  | 3   | 8  | 4  | 4  | 8  | 2  |
| 1808 | 76   | 11 | 26  | 28  | 9  | 2   | 16 | 9  | 27 | 8  | 1  |
| 1809 | 22   | 8  | 1   | 10  | 5  | 4   | 10 | 2  | 1  | 10 | 1  |
| 1810 | 20   | 7  | 4   | 7   | 2  | 4   | 6  | 1  | 1  | 5  | 2  |
| 2001 | 15   | 3  | 6   | 17  | 7  | 1   | 6  | 1  | 5  | 6  | 1  |

|      |     |    |      |    |    |      |    |   |    |    |   |
|------|-----|----|------|----|----|------|----|---|----|----|---|
| 2002 | 21  | 6  | 3    | 13 | 1  | 2    | 6  | 2 | 2  | 7  | 2 |
| 2003 | 24  | 7  | 11   | 17 | 6  | 7    | 12 | 6 | 23 | 10 | 3 |
| 2004 | 20  | 5  | 4    | 11 | 3  | 3    | 9  | 1 | 2  | 9  | 2 |
| 2005 | 9   | 1  | 3    | 6  | 0  | 2    | 3  | 2 | 2  | 8  | 2 |
| 2006 | 35  | 15 | 10   | 16 | 4  | 321  | 6  | 3 | 3  | 8  | 3 |
| 2007 | 33  | 5  | 5    | 24 | 3  | 9    | 8  | 4 | 3  | 10 | 3 |
| 2008 | 25  | 4  | 165  | 14 | 3  | 153  | 8  | 3 | 27 | 10 | 3 |
| 2009 | 20  | 2  | 8    | 11 | 6  | 5    | 5  | 2 | 1  | 8  | 4 |
| 2010 | 16  | 5  | 3    | 9  | 4  | 2    | 4  | 3 | 2  | 6  | 2 |
| 2011 | 22  | 4  | 1    | 12 | 3  | 5    | 10 | 8 | 2  | 6  | 2 |
| 2012 | 33  | 8  | 5    | 20 | 4  | 4    | 4  | 1 | 3  | 12 | 4 |
| 2013 | 216 | 56 | 63   | 11 | 2  | 3    | 8  | 2 | 4  | 10 | 2 |
| 2101 | 20  | 4  | 0    | 12 | 7  | 3    | 7  | 2 | 2  | 9  | 2 |
| 2102 | 17  | 5  | 4    | 13 | 4  | 11   | 5  | 3 | 2  | 6  | 2 |
| 2103 | 27  | 12 | 14   | 18 | 4  | 22   | 7  | 4 | 7  | 4  | 1 |
| 2104 | 30  | 7  | 4    | 16 | 3  | 2    | 6  | 2 | 3  | 10 | 3 |
| 2105 | 82  | 6  | 8    | 31 | 8  | 1033 | 9  | 4 | 6  | 8  | 3 |
| 2106 | 21  | 3  | 2    | 11 | 6  | 3    | 7  | 2 | 1  | 10 | 3 |
| 2107 | 13  | 4  | 3    | 9  | 4  | 3    | 3  | 2 | 1  | 8  | 5 |
| 2201 | 26  | 5  | 8    | 16 | 4  | 3    | 9  | 2 | 3  | 8  | 6 |
| 2202 | 26  | 8  | 6    | 17 | 4  | 6    | 7  | 2 | 2  | 8  | 1 |
| 2203 | 21  | 2  | 3    | 12 | 1  | 1    | 8  | 5 | 34 | 10 | 2 |
| 2204 | 19  | 7  | 4    | 11 | 5  | 3    | 8  | 4 | 1  | 7  | 1 |
| 2205 | 6   | 2  | 18   | 11 | 5  | 6    | 5  | 2 | 2  | 4  | 1 |
| 2206 | 23  | 10 | 13   | 13 | 1  | 1    | 12 | 6 | 6  | 6  | 4 |
| 2207 | 18  | 5  | 4    | 15 | 3  | 4    | 5  | 2 | 1  | 8  | 1 |
| 2208 | 31  | 9  | 21   | 11 | 3  | 2    | 10 | 6 | 24 | 7  | 2 |
| 2209 | 18  | 1  | 4    | 14 | 5  | 3    | 7  | 1 | 3  | 9  | 3 |
| 2210 | 8   | 3  | 3    | 7  | 3  | 6    | 7  | 3 | 1  | 6  | 4 |
| 2211 | 21  | 4  | 4    | 11 | 1  | 5    | 8  | 3 | 2  | 7  | 4 |
| 2212 | 25  | 2  | 5    | 13 | 1  | 2    | 10 | 3 | 5  | 10 | 5 |
| 3001 | 17  | 1  | 6    | 6  | 2  | 4    | 8  | 2 | 1  | 5  | 3 |
| 3301 | 24  | 14 | 2    | 15 | 4  | 3    | 10 | 4 | 2  | 5  | 3 |
| 3302 | 28  | 3  | 6    | 21 | 5  | 3    | 5  | 2 | 3  | 9  | 3 |
| 3401 | 28  | 4  | 17   | 16 | 4  | 30   | 7  | 3 | 6  | 12 | 2 |
| 9001 | 20  | 6  | 7    | 9  | 4  | 6    | 9  | 2 | 3  | 10 | 2 |
| 9002 | 27  | 9  | 292  | 16 | 10 | 540  | 4  | 3 | 1  | 7  | 2 |
| 9003 | 24  | 2  | 1143 | 15 | 3  | 2    | 7  | 2 | 3  | 7  | 1 |

Supplementary Table 3.3 represents all fluorescent signals (0-65535 RFU, relative fluorescent units) for groups of mice contacted to *Bifidobacterium longum* strain NCC2705

| Mouse ID | 3.1    |        |        | 3.2    |        |        | 3.3    |        |        | 3.4    |        |
|----------|--------|--------|--------|--------|--------|--------|--------|--------|--------|--------|--------|
| Nr       | Median | -1st Q | +3rd Q | Median | -1st Q | +3rd Q | Median | -1st Q | +3rd Q | Median | -1st Q |
| 001      | 36     | 25     | 40     | 40     | 18     | 4190   | 28     | 19     | 227    | 15     | 7      |
| 002      | 164    | 109    | 64     | 196    | 98     | 2922   | 116    | 56     | 109    | 61     | 14     |
| 003      | 107    | 49     | 180    | 183    | 106    | 3395   | 150    | 71     | 86     | 89     | 58     |
| 004      | 30     | 4      | 8      | 15     | 3      | 5      | 99     | 31     | 43     | 39     | 6      |
| 005      | 5      | 3      | 5      | 1      | 0      | 1      | 10     | 3      | 8      | 4      | 2      |
| 006      | 19     | 8      | 37     | 24     | 6      | 7      | 30     | 10     | 70     | 18     | 10     |
| 007      | 40     | 24     | 50     | 37     | 17     | 151    | 52     | 19     | 52     | 21     | 8      |
| 009      | 22     | 3      | 6      | 15     | 2      | 5      | 66     | 23     | 21     | 32     | 8      |

|     |     |    |     |     |    |      |     |     |     |    |    |
|-----|-----|----|-----|-----|----|------|-----|-----|-----|----|----|
| 010 | 13  | 9  | 4   | 2   | 0  | 1    | 11  | 7   | 16  | 3  | 2  |
| 011 | 12  | 5  | 17  | 21  | 4  | 4    | 41  | 16  | 89  | 10 | 1  |
| 012 | 60  | 37 | 11  | 40  | 15 | 82   | 45  | 6   | 13  | 23 | 5  |
| 013 | 47  | 17 | 72  | 31  | 11 | 124  | 30  | 8   | 3   | 23 | 10 |
| 014 | 16  | 5  | 4   | 12  | 4  | 1    | 44  | 1   | 2   | 20 | 6  |
| 015 | 6   | 3  | 2   | 2   | 1  | 2    | 8   | 4   | 5   | 2  | 1  |
| 016 | 33  | 23 | 22  | 27  | 15 | 27   | 34  | 11  | 17  | 19 | 9  |
| 017 | 21  | 5  | 34  | 18  | 5  | 40   | 39  | 2   | 1   | 17 | 2  |
| 018 | 41  | 10 | 30  | 35  | 10 | 15   | 34  | 7   | 22  | 23 | 6  |
| 019 | 26  | 6  | 11  | 16  | 6  | 3    | 56  | 18  | 9   | 17 | 6  |
| 020 | 12  | 4  | 6   | 1   | 0  | 1    | 323 | 169 | 288 | 6  | 5  |
| 021 | 15  | 4  | 17  | 17  | 5  | 10   | 27  | 11  | 44  | 12 | 7  |
| 022 | 21  | 9  | 33  | 14  | 5  | 42   | 33  | 13  | 7   | 17 | 3  |
| 023 | 35  | 7  | 53  | 25  | 8  | 60   | 32  | 5   | 8   | 20 | 5  |
| 024 | 31  | 10 | 18  | 21  | 9  | 3    | 40  | 3   | 9   | 14 | 4  |
| 025 | 6   | 2  | 4   | 2   | 1  | 3    | 9   | 5   | 4   | 3  | 2  |
| 026 | 17  | 7  | 8   | 18  | 8  | 8    | 35  | 15  | 36  | 7  | 4  |
| 027 | 19  | 7  | 24  | 11  | 3  | 3    | 34  | 7   | 2   | 16 | 4  |
| 037 | 73  | 9  | 32  | 44  | 18 | 141  | 39  | 12  | 30  | 29 | 17 |
| 038 | 33  | 3  | 4   | 13  | 2  | 5    | 49  | 5   | 17  | 19 | 6  |
| 043 | 28  | 23 | 8   | 14  | 8  | 9    | 27  | 14  | 1   | 5  | 2  |
| 044 | 13  | 3  | 3   | 12  | 3  | 3    | 51  | 14  | 15  | 14 | 3  |
| 045 | 33  | 7  | 99  | 33  | 4  | 180  | 31  | 10  | 5   | 21 | 7  |
| 046 | 15  | 3  | 1   | 8   | 1  | 2    | 24  | 2   | 16  | 17 | 6  |
| 047 | 24  | 14 | 15  | 27  | 4  | 7    | 40  | 27  | 13  | 22 | 10 |
| 048 | 25  | 16 | 24  | 15  | 6  | 20   | 29  | 14  | 17  | 15 | 6  |
| 049 | 23  | 4  | 28  | 21  | 8  | 1356 | 34  | 10  | 10  | 16 | 3  |
| 050 | 136 | 64 | 873 | 149 | 90 | 1249 | 53  | 24  | 29  | 19 | 5  |
| 051 | 15  | 1  | 8   | 12  | 2  | 8    | 19  | 5   | 14  | 12 | 5  |
| 052 | 5   | 1  | 6   | 1   | 0  | 1    | 10  | 4   | 14  | 3  | 1  |
| 053 | 11  | 3  | 3   | 9   | 3  | 1    | 20  | 6   | 33  | 7  | 1  |
| 054 | 32  | 14 | 4   | 22  | 6  | 23   | 35  | 8   | 4   | 20 | 3  |
| 055 | 38  | 12 | 28  | 34  | 6  | 51   | 34  | 14  | 8   | 13 | 4  |
| 071 | 38  | 16 | 46  | 44  | 16 | 16   | 48  | 8   | 21  | 26 | 7  |
| 072 | 24  | 14 | 44  | 1   | 0  | 0    | 14  | 9   | 3   | 2  | 1  |
| 073 | 16  | 9  | 17  | 11  | 5  | 6    | 27  | 7   | 24  | 13 | 7  |
| 074 | 32  | 14 | 21  | 29  | 12 | 34   | 36  | 6   | 2   | 14 | 3  |
| 075 | 53  | 22 | 52  | 48  | 10 | 132  | 35  | 7   | 27  | 26 | 11 |
| 076 | 41  | 25 | 16  | 26  | 15 | 21   | 42  | 9   | 3   | 16 | 5  |
| 077 | 37  | 30 | 36  | 5   | 4  | 11   | 12  | 6   | 16  | 3  | 2  |
| 078 | 19  | 12 | 38  | 24  | 13 | 29   | 43  | 28  | 11  | 7  | 2  |
| 080 | 100 | 11 | 62  | 105 | 17 | 52   | 44  | 11  | 26  | 23 | 4  |
| 081 | 41  | 19 | 12  | 38  | 22 | 21   | 28  | 6   | 7   | 11 | 2  |
| 082 | 5   | 1  | 2   | 1   | 0  | 0    | 13  | 3   | 2   | 3  | 2  |
| 083 | 11  | 4  | 2   | 11  | 2  | 4    | 35  | 5   | 13  | 5  | 0  |
| 084 | 22  | 8  | 18  | 33  | 8  | 28   | 35  | 9   | 27  | 16 | 4  |
| 085 | 58  | 26 | 25  | 71  | 24 | 34   | 29  | 6   | 4   | 14 | 4  |
| 086 | 52  | 19 | 7   | 41  | 15 | 17   | 30  | 4   | 14  | 11 | 3  |
| 087 | 3   | 1  | 1   | 1   | 0  | 3    | 9   | 6   | 8   | 2  | 1  |
| 088 | 62  | 49 | 34  | 69  | 45 | 20   | 43  | 26  | 11  | 15 | 9  |

|     |     |    |     |     |    |     |    |    |     |    |    |
|-----|-----|----|-----|-----|----|-----|----|----|-----|----|----|
| 089 | 49  | 23 | 39  | 76  | 22 | 48  | 35 | 2  | 5   | 17 | 2  |
| 092 | 33  | 4  | 66  | 26  | 10 | 39  | 50 | 6  | 120 | 18 | 6  |
| 093 | 4   | 2  | 4   | 1   | 0  | 1   | 12 | 6  | 4   | 2  | 1  |
| 094 | 14  | 5  | 1   | 11  | 5  | 0   | 32 | 20 | 9   | 6  | 3  |
| 096 | 73  | 19 | 108 | 116 | 48 | 64  | 36 | 16 | 16  | 22 | 8  |
| 097 | 101 | 41 | 32  | 92  | 27 | 31  | 36 | 5  | 5   | 16 | 3  |
| 098 | 6   | 2  | 269 | 2   | 1  | 311 | 14 | 6  | 4   | 5  | 4  |
| 099 | 14  | 6  | 5   | 8   | 2  | 0   | 25 | 15 | 22  | 11 | 2  |
| 100 | 18  | 4  | 0   | 17  | 7  | 15  | 26 | 8  | 6   | 8  | 4  |
| 101 | 69  | 35 | 20  | 77  | 41 | 657 | 38 | 17 | 27  | 13 | 2  |
| 102 | 63  | 9  | 5   | 76  | 5  | 9   | 51 | 15 | 28  | 16 | 7  |
| 103 | 4   | 2  | 3   | 1   | 0  | 2   | 15 | 10 | 4   | 6  | 4  |
| 104 | 18  | 9  | 30  | 31  | 21 | 6   | 26 | 7  | 14  | 21 | 10 |
| 105 | 21  | 4  | 34  | 57  | 25 | 24  | 24 | 2  | 2   | 11 | 2  |
| 106 | 51  | 16 | 49  | 45  | 19 | 39  | 28 | 5  | 14  | 12 | 3  |
| 107 | 76  | 34 | 22  | 69  | 28 | 9   | 40 | 9  | 9   | 19 | 5  |
| 110 | 42  | 31 | 49  | 22  | 14 | 35  | 49 | 12 | 4   | 18 | 7  |
| 111 | 17  | 4  | 8   | 24  | 10 | 11  | 41 | 8  | 4   | 15 | 7  |
| 112 | 35  | 9  | 22  | 32  | 5  | 70  | 37 | 9  | 28  | 16 | 3  |
| 113 | 71  | 6  | 29  | 85  | 30 | 19  | 29 | 4  | 11  | 15 | 6  |
| 114 | 5   | 1  | 1   | 1   | 0  | 0   | 14 | 7  | 1   | 3  | 2  |
| 115 | 13  | 4  | 5   | 8   | 2  | 5   | 25 | 10 | 5   | 10 | 4  |
| 116 | 17  | 3  | 20  | 8   | 1  | 2   | 52 | 13 | 22  | 17 | 5  |
| 117 | 36  | 9  | 44  | 22  | 8  | 27  | 25 | 2  | 17  | 25 | 9  |
| 118 | 31  | 4  | 20  | 24  | 9  | 25  | 34 | 7  | 4   | 9  | 0  |
| 119 | 3   | 1  | 1   | 1   | 0  | 0   | 6  | 2  | 4   | 2  | 1  |
| 120 | 12  | 3  | 9   | 10  | 1  | 0   | 38 | 6  | 12  | 5  | 0  |
| 121 | 14  | 7  | 1   | 10  | 1  | 1   | 28 | 5  | 2   | 11 | 2  |
| 122 | 18  | 2  | 4   | 20  | 11 | 33  | 22 | 12 | 3   | 10 | 1  |
| 123 | 19  | 4  | 3   | 13  | 5  | 4   | 19 | 3  | 4   | 10 | 3  |
| 125 | 64  | 44 | 36  | 15  | 3  | 0   | 77 | 15 | 37  | 26 | 6  |
| 126 | 27  | 9  | 12  | 21  | 6  | 3   | 38 | 2  | 8   | 19 | 4  |
| 127 | 63  | 23 | 50  | 73  | 32 | 52  | 52 | 9  | 5   | 36 | 10 |
| 128 | 55  | 5  | 14  | 54  | 9  | 12  | 50 | 8  | 14  | 39 | 4  |
| 129 | 9   | 6  | 21  | 1   | 0  | 0   | 16 | 8  | 6   | 4  | 2  |
| 130 | 11  | 3  | 13  | 11  | 6  | 6   | 23 | 7  | 20  | 12 | 8  |
| 131 | 47  | 8  | 15  | 29  | 6  | 6   | 56 | 20 | 2   | 80 | 16 |
| 132 | 38  | 17 | 26  | 31  | 11 | 33  | 33 | 7  | 17  | 15 | 5  |
| 133 | 33  | 7  | 7   | 19  | 4  | 8   | 34 | 7  | 5   | 21 | 2  |
| 134 | 8   | 4  | 140 | 4   | 3  | 125 | 13 | 7  | 10  | 5  | 4  |
| 135 | 15  | 7  | 6   | 6   | 1  | 3   | 20 | 9  | 27  | 10 | 0  |
| 136 | 39  | 13 | 160 | 66  | 38 | 252 | 44 | 19 | 15  | 28 | 9  |
| 137 | 84  | 42 | 163 | 96  | 65 | 293 | 50 | 11 | 25  | 30 | 8  |
| 138 | 33  | 9  | 6   | 33  | 6  | 7   | 38 | 13 | 11  | 24 | 3  |
| 139 | 5   | 1  | 2   | 1   | 0  | 2   | 16 | 5  | 10  | 4  | 2  |
| 140 | 120 | 92 | 51  | 111 | 86 | 26  | 85 | 30 | 53  | 81 | 29 |
| 142 | 77  | 27 | 27  | 64  | 17 | 42  | 33 | 6  | 17  | 16 | 5  |
| 143 | 28  | 10 | 7   | 28  | 9  | 2   | 29 | 3  | 2   | 6  | 2  |
| 144 | 8   | 5  | 13  | 5   | 4  | 15  | 19 | 14 | 8   | 6  | 4  |
| 145 | 13  | 4  | 21  | 12  | 4  | 18  | 44 | 6  | 10  | 17 | 4  |

|     |     |     |     |    |    |    |       |     |      |     |    |
|-----|-----|-----|-----|----|----|----|-------|-----|------|-----|----|
| 146 | 25  | 11  | 19  | 37 | 16 | 16 | 44    | 7   | 7    | 21  | 9  |
| 149 | 6   | 2   | 13  | 1  | 0  | 3  | 15    | 9   | 11   | 6   | 4  |
| 150 | 74  | 32  | 76  | 35 | 17 | 6  | 57    | 26  | 18   | 77  | 30 |
| 151 | 27  | 7   | 8   | 28 | 15 | 9  | 43    | 18  | 12   | 14  | 4  |
| 152 | 51  | 30  | 10  | 39 | 21 | 12 | 34    | 9   | 49   | 17  | 4  |
| 153 | 42  | 15  | 30  | 22 | 4  | 11 | 43    | 12  | 13   | 18  | 7  |
| 154 | 8   | 4   | 27  | 1  | 0  | 4  | 12    | 5   | 5    | 14  | 13 |
| 156 | 26  | 7   | 13  | 19 | 8  | 7  | 328   | 23  | 52   | 18  | 8  |
| 158 | 54  | 17  | 13  | 48 | 11 | 14 | 43    | 4   | 5    | 15  | 7  |
| 159 | 6   | 1   | 11  | 2  | 1  | 10 | 9     | 2   | 12   | 5   | 3  |
| 160 | 23  | 9   | 10  | 28 | 9  | 8  | 56    | 24  | 12   | 9   | 4  |
| 161 | 32  | 8   | 19  | 23 | 5  | 9  | 39    | 13  | 4    | 9   | 3  |
| 162 | 72  | 18  | 24  | 51 | 12 | 49 | 54    | 13  | 10   | 18  | 6  |
| 164 | 11  | 6   | 7   | 1  | 0  | 10 | 21    | 14  | 11   | 3   | 2  |
| 165 | 20  | 11  | 9   | 13 | 5  | 11 | 31    | 23  | 21   | 14  | 8  |
| 166 | 26  | 10  | 12  | 14 | 7  | 3  | 47127 | 608 | 1723 | 19  | 4  |
| 167 | 62  | 32  | 28  | 60 | 37 | 73 | 27    | 6   | 18   | 12  | 4  |
| 168 | 51  | 17  | 9   | 32 | 5  | 17 | 41    | 9   | 10   | 20  | 4  |
| 169 | 6   | 2   | 52  | 5  | 4  | 52 | 25    | 17  | 6    | 7   | 5  |
| 170 | 43  | 14  | 77  | 39 | 11 | 82 | 40    | 20  | 10   | 19  | 8  |
| 171 | 12  | 0   | 8   | 21 | 10 | 67 | 33    | 14  | 7    | 11  | 1  |
| 173 | 74  | 15  | 45  | 99 | 34 | 79 | 36    | 18  | 42   | 15  | 6  |
| 174 | 81  | 15  | 8   | 78 | 12 | 9  | 34    | 13  | 13   | 14  | 5  |
| 175 | 5   | 2   | 7   | 1  | 0  | 7  | 21    | 15  | 3    | 7   | 5  |
| 176 | 74  | 41  | 94  | 20 | 5  | 8  | 92    | 63  | 24   | 204 | 30 |
| 177 | 203 | 124 | 102 | 24 | 9  | 2  | 430   | 199 | 17   | 312 | 39 |
| 178 | 93  | 11  | 14  | 51 | 20 | 63 | 69    | 22  | 21   | 20  | 4  |
| 179 | 23  | 7   | 9   | 14 | 2  | 2  | 44    | 9   | 8    | 19  | 5  |
| 180 | 5   | 2   | 4   | 2  | 1  | 3  | 18    | 8   | 12   | 8   | 6  |
| 181 | 238 | 150 | 151 | 27 | 6  | 8  | 556   | 187 | 128  | 78  | 9  |
| 182 | 28  | 13  | 19  | 24 | 14 | 10 | 100   | 10  | 15   | 10  | 2  |
| 183 | 92  | 36  | 31  | 38 | 17 | 16 | 61    | 10  | 32   | 11  | 2  |
| 184 | 47  | 6   | 43  | 21 | 6  | 25 | 48    | 13  | 4    | 13  | 5  |
| 186 | 17  | 6   | 12  | 29 | 12 | 5  | 37    | 5   | 14   | 14  | 6  |
| 187 | 14  | 4   | 6   | 16 | 4  | 5  | 37    | 6   | 4    | 12  | 3  |
| 188 | 25  | 5   | 8   | 28 | 9  | 29 | 22    | 0   | 5    | 11  | 2  |
| 189 | 62  | 10  | 17  | 33 | 17 | 4  | 68    | 23  | 18   | 18  | 3  |
| 190 | 8   | 5   | 10  | 3  | 2  | 12 | 8     | 5   | 5    | 3   | 2  |
| 191 | 30  | 18  | 6   | 34 | 13 | 7  | 60    | 16  | 29   | 14  | 5  |
| 192 | 26  | 13  | 8   | 14 | 6  | 9  | 44    | 12  | 8    | 19  | 2  |
| 193 | 30  | 5   | 24  | 21 | 5  | 11 | 164   | 17  | 20   | 15  | 6  |
| 194 | 28  | 14  | 17  | 12 | 3  | 11 | 47    | 19  | 13   | 12  | 3  |
| 195 | 6   | 2   | 3   | 2  | 1  | 4  | 8     | 3   | 10   | 3   | 2  |
| 196 | 12  | 7   | 5   | 11 | 4  | 4  | 41    | 9   | 8    | 7   | 2  |
| 197 | 13  | 5   | 15  | 11 | 4  | 3  | 39    | 7   | 5    | 14  | 4  |
| 198 | 86  | 22  | 30  | 18 | 2  | 36 | 41    | 15  | 8    | 15  | 2  |
| 199 | 19  | 5   | 7   | 10 | 1  | 1  | 28    | 4   | 11   | 11  | 3  |
| 200 | 8   | 3   | 1   | 2  | 1  | 3  | 19    | 12  | 4    | 3   | 2  |
| 201 | 20  | 14  | 7   | 17 | 4  | 3  | 177   | 112 | 78   | 14  | 4  |
| 202 | 38  | 16  | 21  | 11 | 3  | 0  | 55    | 15  | 8    | 13  | 3  |

|     |     |     |     |     |    |    |     |     |     |     |    |
|-----|-----|-----|-----|-----|----|----|-----|-----|-----|-----|----|
| 203 | 73  | 21  | 13  | 78  | 53 | 38 | 52  | 30  | 14  | 21  | 11 |
| 204 | 17  | 6   | 5   | 14  | 4  | 13 | 25  | 5   | 5   | 8   | 2  |
| 205 | 11  | 5   | 20  | 6   | 5  | 27 | 23  | 10  | 6   | 11  | 7  |
| 206 | 30  | 13  | 45  | 30  | 7  | 47 | 33  | 14  | 11  | 18  | 6  |
| 207 | 42  | 14  | 20  | 47  | 6  | 44 | 31  | 5   | 15  | 11  | 3  |
| 215 | 70  | 10  | 4   | 97  | 19 | 41 | 39  | 23  | 3   | 23  | 8  |
| 216 | 180 | 7   | 4   | 227 | 11 | 35 | 127 | 22  | 7   | 229 | 17 |
| 217 | 34  | 30  | 37  | 26  | 25 | 45 | 41  | 23  | 15  | 13  | 10 |
| 219 | 28  | 20  | 12  | 18  | 4  | 8  | 27  | 11  | 17  | 21  | 12 |
| 220 | 46  | 29  | 113 | 77  | 20 | 32 | 43  | 8   | 9   | 20  | 6  |
| 221 | 37  | 17  | 12  | 52  | 15 | 29 | 32  | 3   | 28  | 26  | 5  |
| 222 | 119 | 12  | 24  | 127 | 11 | 10 | 35  | 6   | 5   | 17  | 2  |
| 223 | 5   | 3   | 1   | 1   | 0  | 4  | 12  | 4   | 13  | 8   | 6  |
| 225 | 32  | 15  | 24  | 106 | 31 | 17 | 43  | 8   | 7   | 33  | 10 |
| 226 | 48  | 18  | 19  | 71  | 16 | 76 | 33  | 10  | 41  | 30  | 15 |
| 227 | 65  | 24  | 7   | 68  | 14 | 14 | 65  | 7   | 13  | 19  | 2  |
| 228 | 9   | 6   | 43  | 13  | 12 | 31 | 17  | 8   | 11  | 6   | 4  |
| 229 | 11  | 3   | 6   | 10  | 1  | 5  | 40  | 7   | 17  | 11  | 4  |
| 231 | 25  | 11  | 16  | 52  | 29 | 10 | 39  | 9   | 3   | 14  | 2  |
| 232 | 49  | 20  | 30  | 73  | 20 | 25 | 25  | 7   | 20  | 18  | 5  |
| 233 | 128 | 3   | 32  | 135 | 23 | 15 | 39  | 3   | 2   | 14  | 2  |
| 234 | 45  | 20  | 14  | 12  | 11 | 18 | 14  | 3   | 16  | 10  | 5  |
| 235 | 41  | 11  | 4   | 56  | 8  | 21 | 130 | 38  | 28  | 13  | 4  |
| 236 | 20  | 4   | 3   | 13  | 5  | 3  | 384 | 105 | 193 | 14  | 2  |
| 237 | 37  | 7   | 33  | 35  | 10 | 20 | 39  | 6   | 4   | 23  | 5  |
| 239 | 26  | 20  | 33  | 5   | 4  | 22 | 16  | 9   | 13  | 3   | 1  |
| 240 | 14  | 6   | 6   | 13  | 6  | 8  | 33  | 7   | 19  | 10  | 3  |
| 241 | 14  | 2   | 3   | 14  | 5  | 8  | 28  | 3   | 5   | 14  | 4  |
| 242 | 44  | 21  | 9   | 40  | 15 | 31 | 37  | 13  | 11  | 19  | 9  |
| 243 | 28  | 11  | 1   | 23  | 8  | 33 | 37  | 9   | 9   | 11  | 3  |
| 245 | 32  | 15  | 16  | 6   | 5  | 13 | 23  | 10  | 17  | 4   | 3  |
| 246 | 39  | 18  | 28  | 60  | 17 | 16 | 61  | 19  | 15  | 17  | 6  |
| 247 | 20  | 4   | 5   | 19  | 9  | 2  | 27  | 2   | 3   | 14  | 4  |
| 248 | 86  | 11  | 23  | 145 | 6  | 5  | 36  | 15  | 29  | 16  | 5  |
| 249 | 56  | 22  | 28  | 29  | 5  | 10 | 27  | 8   | 4   | 10  | 1  |
| 250 | 9   | 6   | 11  | 3   | 2  | 3  | 20  | 9   | 7   | 9   | 3  |
| 251 | 256 | 220 | 288 | 46  | 23 | 44 | 55  | 35  | 25  | 33  | 4  |
| 252 | 19  | 7   | 7   | 20  | 8  | 21 | 24  | 7   | 4   | 6   | 2  |
| 253 | 81  | 26  | 22  | 134 | 48 | 18 | 25  | 4   | 29  | 19  | 3  |
| 254 | 67  | 40  | 25  | 55  | 23 | 74 | 25  | 6   | 6   | 9   | 3  |
| 255 | 38  | 24  | 8   | 1   | 0  | 27 | 18  | 7   | 6   | 11  | 9  |
| 256 | 52  | 34  | 21  | 36  | 25 | 17 | 34  | 12  | 21  | 53  | 12 |
| 258 | 16  | 4   | 12  | 19  | 7  | 4  | 26  | 6   | 4   | 12  | 5  |
| 259 | 89  | 18  | 32  | 141 | 39 | 31 | 30  | 6   | 11  | 105 | 15 |
| 260 | 460 | 54  | 40  | 96  | 38 | 26 | 55  | 5   | 7   | 18  | 4  |
| 261 | 24  | 20  | 28  | 7   | 6  | 36 | 21  | 5   | 10  | 7   | 6  |
| 262 | 13  | 5   | 5   | 11  | 4  | 0  | 31  | 6   | 8   | 11  | 4  |
| 263 | 16  | 4   | 5   | 12  | 4  | 3  | 40  | 17  | 9   | 16  | 6  |
| 264 | 66  | 11  | 23  | 87  | 18 | 19 | 52  | 15  | 20  | 43  | 3  |
| 266 | 30  | 24  | 13  | 8   | 7  | 26 | 16  | 8   | 9   | 7   | 5  |



|     |      |    |    |      |    |    |      |     |     |      |    |
|-----|------|----|----|------|----|----|------|-----|-----|------|----|
| 267 | 59   | 42 | 23 | 67   | 28 | 17 | 109  | 42  | 21  | 93   | 33 |
| 268 | 14   | 3  | 9  | 27   | 8  | 7  | 46   | 11  | 28  | 19   | 4  |
| 287 | 76   | 38 | 8  | 46   | 14 | 19 | 62   | 22  | 20  | 13   | 4  |
| 288 | 26   | 4  | 9  | 30   | 3  | 18 | 20   | 2   | 3   | 9    | 2  |
| 289 | 10   | 5  | 18 | 7    | 4  | 11 | 18   | 12  | 11  | 8    | 6  |
| 290 | 14   | 4  | 5  | 15   | 6  | 4  | 40   | 12  | 5   | 11   | 3  |
| 291 | 27   | 9  | 18 | 45   | 16 | 17 | 36   | 13  | 4   | 16   | 3  |
| 292 | 32   | 18 | 11 | 28   | 3  | 7  | 33   | 16  | 18  | 11   | 4  |
| 293 | 28   | 10 | 2  | 23   | 6  | 8  | 27   | 5   | 4   | 7    | 1  |
| 294 | 7    | 2  | 5  | 4    | 2  | 2  | 11   | 7   | 10  | 6    | 5  |
| 295 | 40   | 15 | 16 | 54   | 18 | 27 | 56   | 22  | 18  | 17   | 4  |
| 296 | 18   | 3  | 11 | 21   | 8  | 4  | 34   | 10  | 6   | 11   | 4  |
| 297 | 50   | 10 | 28 | 79   | 40 | 24 | 35   | 6   | 30  | 13   | 2  |
| 298 | 33   | 8  | 12 | 42   | 17 | 13 | 54   | 2   | 3   | 15   | 4  |
| 299 | 9    | 6  | 34 | 4    | 3  | 18 | 29   | 10  | 10  | 3    | 2  |
| 300 | 37   | 14 | 17 | 60   | 18 | 15 | 45   | 12  | 12  | 14   | 2  |
| 302 | 76   | 17 | 6  | 102  | 4  | 6  | 39   | 3   | 14  | 30   | 14 |
| 303 | 64   | 53 | 62 | 40   | 20 | 61 | 81   | 6   | 8   | 18   | 3  |
| 304 | 6    | 2  | 29 | 3    | 2  | 9  | 14   | 9   | 11  | 13   | 11 |
| 305 | 11   | 2  | 5  | 33   | 17 | 11 | 41   | 27  | 13  | 16   | 6  |
| 306 | 15   | 3  | 8  | 22   | 10 | 2  | 29   | 7   | 5   | 13   | 5  |
| 307 | 33   | 12 | 32 | 41   | 21 | 24 | 25   | 8   | 7   | 8    | 1  |
| 308 | 63   | 17 | 10 | 83   | 15 | 21 | 46   | 20  | 12  | 23   | 11 |
| 309 | 6    | 3  | 6  | 6    | 3  | 4  | 25   | 13  | 10  | 7    | 5  |
| 310 | 19   | 7  | 9  | 21   | 5  | 9  | 24   | 10  | 11  | 12   | 3  |
| 315 | 69   | 12 | 15 | 65   | 6  | 14 | 68   | 6   | 8   | 48   | 12 |
| 318 | 38   | 16 | 14 | 47   | 18 | 11 | 139  | 30  | 33  | 14   | 4  |
| 319 | 21   | 9  | 10 | 21   | 6  | 7  | 88   | 1   | 3   | 47   | 9  |
| 320 | 67   | 2  | 25 | 53   | 15 | 11 | 121  | 17  | 9   | 84   | 12 |
| 321 | 32   | 6  | 11 | 32   | 5  | 8  | 32   | 6   | 7   | 12   | 0  |
| 322 | 8    | 3  | 7  | 6    | 5  | 5  | 22   | 16  | 5   | 6    | 1  |
| 323 | 45   | 23 | 5  | 60   | 21 | 5  | 50   | 11  | 7   | 12   | 3  |
| 324 | 16   | 2  | 8  | 40   | 27 | 12 | 45   | 3   | 1   | 15   | 4  |
| 325 | 44   | 3  | 12 | 44   | 8  | 17 | 53   | 13  | 20  | 31   | 3  |
| 326 | 42   | 11 | 14 | 36   | 4  | 15 | 46   | 6   | 17  | 25   | 3  |
| 327 | 7    | 1  | 4  | 3    | 1  | 5  | 22   | 11  | 8   | 7    | 6  |
| 328 | 31   | 4  | 12 | 32   | 2  | 4  | 68   | 9   | 78  | 28   | 6  |
| 329 | 51   | 11 | 24 | 57   | 7  | 7  | 69   | 1   | 2   | 47   | 9  |
| 330 | 33   | 3  | 8  | 37   | 9  | 17 | 40   | 2   | 35  | 27   | 2  |
| 331 | 75   | 15 | 7  | 64   | 12 | 14 | 35   | 9   | 4   | 16   | 5  |
| 332 | 12   | 4  | 6  | 3    | 2  | 4  | 9    | 4   | 10  | 7    | 4  |
| 333 | 26   | 7  | 9  | 31   | 8  | 6  | 88   | 4   | 9   | 15   | 4  |
| 334 | 25   | 9  | 15 | 34   | 6  | 14 | 43   | 12  | 5   | 20   | 5  |
| 335 | 25   | 5  | 6  | 20   | 6  | 3  | 67   | 11  | 15  | 11   | 1  |
| 359 | 44   | 8  | 11 | 36   | 6  | 11 | 35   | 8   | 18  | 13   | 3  |
| 360 | 16   | 12 | 14 | 13   | 11 | 19 | 30   | 19  | 4   | 4    | 3  |
| 361 | 42   | 10 | 10 | 105  | 14 | 6  | 70   | 15  | 37  | 23   | 9  |
| 362 | 45   | 25 | 79 | 28   | 8  | 26 | 4302 | 475 | 181 | 321  | 22 |
| 363 | 73   | 25 | 23 | 44   | 6  | 12 | 4634 | 480 | 372 | 28   | 13 |
| 364 | 1336 | 73 | 21 | 1472 | 57 | 54 | 1307 | 110 | 35  | 1224 | 76 |

|     |     |    |    |     |    |    |      |     |     |     |     |
|-----|-----|----|----|-----|----|----|------|-----|-----|-----|-----|
| 365 | 24  | 15 | 28 | 18  | 10 | 39 | 21   | 16  | 11  | 14  | 10  |
| 366 | 26  | 12 | 7  | 34  | 14 | 8  | 158  | 106 | 67  | 14  | 2   |
| 368 | 60  | 18 | 13 | 75  | 23 | 17 | 658  | 310 | 308 | 12  | 4   |
| 369 | 42  | 16 | 35 | 39  | 9  | 17 | 49   | 35  | 7   | 56  | 16  |
| 371 | 26  | 19 | 11 | 11  | 9  | 7  | 17   | 10  | 4   | 11  | 6   |
| 372 | 219 | 17 | 16 | 147 | 6  | 13 | 94   | 43  | 45  | 104 | 35  |
| 373 | 22  | 9  | 25 | 34  | 12 | 14 | 24   | 5   | 13  | 13  | 3   |
| 374 | 55  | 31 | 31 | 60  | 9  | 37 | 35   | 8   | 30  | 10  | 1   |
| 375 | 34  | 19 | 25 | 57  | 25 | 42 | 25   | 3   | 3   | 11  | 3   |
| 376 | 7   | 2  | 3  | 2   | 1  | 1  | 17   | 8   | 3   | 10  | 5   |
| 377 | 13  | 3  | 2  | 21  | 5  | 2  | 35   | 3   | 7   | 13  | 3   |
| 378 | 15  | 5  | 16 | 44  | 26 | 7  | 37   | 9   | 10  | 15  | 3   |
| 379 | 20  | 4  | 3  | 15  | 2  | 1  | 24   | 9   | 12  | 12  | 3   |
| 380 | 48  | 19 | 25 | 47  | 15 | 19 | 55   | 18  | 6   | 19  | 8   |
| 381 | 41  | 23 | 31 | 15  | 13 | 25 | 31   | 14  | 8   | 308 | 303 |
| 382 | 19  | 7  | 6  | 24  | 4  | 9  | 33   | 10  | 13  | 10  | 2   |
| 383 | 28  | 9  | 7  | 21  | 4  | 4  | 39   | 3   | 5   | 23  | 7   |
| 384 | 56  | 10 | 7  | 57  | 13 | 7  | 32   | 2   | 1   | 16  | 1   |
| 386 | 46  | 21 | 12 | 13  | 9  | 41 | 19   | 5   | 10  | 12  | 11  |
| 387 | 45  | 21 | 13 | 40  | 10 | 16 | 62   | 7   | 10  | 37  | 11  |
| 388 | 36  | 9  | 15 | 66  | 13 | 9  | 37   | 6   | 17  | 18  | 5   |
| 389 | 61  | 19 | 11 | 63  | 17 | 23 | 38   | 3   | 20  | 25  | 5   |
| 390 | 19  | 2  | 8  | 21  | 4  | 5  | 33   | 4   | 13  | 13  | 4   |
| 392 | 165 | 26 | 35 | 74  | 12 | 5  | 7040 | 108 | 457 | 841 | 76  |
| 394 | 26  | 11 | 7  | 16  | 3  | 1  | 29   | 9   | 5   | 8   | 0   |
| 395 | 34  | 9  | 17 | 25  | 5  | 6  | 34   | 9   | 12  | 12  | 6   |
| 396 | 125 | 6  | 14 | 114 | 16 | 7  | 52   | 2   | 13  | 78  | 9   |
| 397 | 42  | 37 | 23 | 42  | 40 | 44 | 94   | 49  | 8   | 28  | 26  |
| 398 | 85  | 5  | 11 | 236 | 5  | 4  | 179  | 22  | 30  | 72  | 12  |
| 399 | 27  | 12 | 9  | 32  | 2  | 14 | 36   | 7   | 7   | 12  | 1   |
| 401 | 24  | 5  | 8  | 21  | 7  | 5  | 27   | 2   | 9   | 9   | 2   |
| 402 | 29  | 11 | 4  | 17  | 6  | 9  | 23   | 15  | 10  | 14  | 11  |
| 403 | 16  | 4  | 6  | 19  | 4  | 6  | 34   | 14  | 5   | 16  | 5   |
| 419 | 23  | 9  | 19 | 19  | 7  | 4  | 24   | 5   | 11  | 12  | 2   |
| 420 | 49  | 13 | 8  | 46  | 18 | 18 | 27   | 5   | 7   | 12  | 4   |
| 423 | 42  | 24 | 8  | 73  | 22 | 8  | 38   | 13  | 10  | 16  | 3   |
| 425 | 19  | 2  | 14 | 49  | 11 | 21 | 37   | 9   | 12  | 15  | 4   |
| 426 | 22  | 5  | 12 | 16  | 4  | 12 | 48   | 19  | 3   | 10  | 3   |
| 428 | 20  | 7  | 10 | 12  | 7  | 6  | 27   | 12  | 8   | 20  | 12  |
| 429 | 26  | 12 | 9  | 30  | 7  | 12 | 41   | 5   | 8   | 15  | 4   |
| 431 | 57  | 23 | 23 | 42  | 12 | 25 | 48   | 16  | 6   | 17  | 6   |
| 432 | 25  | 5  | 24 | 33  | 8  | 12 | 27   | 4   | 19  | 11  | 6   |
| 433 | 12  | 2  | 8  | 5   | 3  | 10 | 26   | 17  | 2   | 5   | 3   |
| 434 | 15  | 3  | 2  | 19  | 3  | 1  | 41   | 4   | 10  | 20  | 8   |
| 435 | 31  | 10 | 21 | 53  | 12 | 4  | 36   | 9   | 11  | 74  | 5   |
| 436 | 37  | 10 | 24 | 44  | 16 | 15 | 37   | 6   | 9   | 16  | 6   |
| 437 | 348 | 18 | 24 | 228 | 7  | 8  | 7644 | 437 | 367 | 604 | 19  |
| 479 | 9   | 1  | 3  | 3   | 2  | 4  | 18   | 4   | 7   | 9   | 4   |
| 480 | 144 | 42 | 28 | 216 | 33 | 11 | 142  | 42  | 45  | 182 | 19  |
| 481 | 196 | 28 | 13 | 303 | 6  | 17 | 260  | 12  | 4   | 235 | 17  |

|      |     |     |    |     |    |    |     |    |     |     |    |
|------|-----|-----|----|-----|----|----|-----|----|-----|-----|----|
| 483  | 68  | 35  | 12 | 60  | 20 | 21 | 38  | 12 | 7   | 14  | 3  |
| 492  | 17  | 2   | 9  | 16  | 2  | 1  | 22  | 9  | 9   | 12  | 3  |
| 493  | 8   | 3   | 2  | 5   | 3  | 0  | 17  | 11 | 12  | 4   | 2  |
| 495  | 14  | 4   | 3  | 11  | 1  | 9  | 32  | 6  | 4   | 13  | 3  |
| 496  | 22  | 4   | 11 | 25  | 13 | 6  | 49  | 10 | 9   | 21  | 3  |
| 497  | 208 | 108 | 52 | 215 | 68 | 17 | 113 | 12 | 15  | 130 | 24 |
| 498  | 15  | 3   | 20 | 14  | 4  | 5  | 18  | 3  | 9   | 12  | 2  |
| 499  | 15  | 6   | 5  | 6   | 2  | 12 | 9   | 4  | 16  | 11  | 5  |
| 501  | 14  | 7   | 6  | 15  | 3  | 3  | 32  | 15 | 12  | 15  | 7  |
| 502  | 19  | 4   | 30 | 12  | 2  | 4  | 28  | 2  | 9   | 14  | 8  |
| 503  | 17  | 2   | 6  | 14  | 2  | 2  | 34  | 17 | 9   | 16  | 5  |
| 504  | 20  | 5   | 6  | 25  | 4  | 5  | 28  | 7  | 7   | 13  | 1  |
| 505  | 20  | 2   | 8  | 8   | 4  | 8  | 22  | 14 | 14  | 22  | 20 |
| 506  | 183 | 34  | 29 | 170 | 7  | 8  | 139 | 65 | 39  | 154 | 13 |
| 527  | 25  | 11  | 4  | 23  | 5  | 5  | 26  | 4  | 9   | 13  | 5  |
| 528  | 43  | 16  | 18 | 55  | 19 | 6  | 39  | 15 | 17  | 14  | 1  |
| 529  | 26  | 10  | 4  | 20  | 8  | 5  | 30  | 2  | 10  | 13  | 3  |
| 530  | 19  | 4   | 7  | 14  | 10 | 15 | 22  | 13 | 9   | 11  | 6  |
| 531  | 26  | 10  | 10 | 39  | 5  | 6  | 53  | 7  | 11  | 21  | 6  |
| 534  | 59  | 5   | 3  | 56  | 10 | 9  | 36  | 4  | 4   | 16  | 5  |
| 535  | 12  | 3   | 8  | 3   | 1  | 1  | 21  | 12 | 17  | 11  | 6  |
| 536  | 23  | 4   | 14 | 25  | 4  | 6  | 56  | 11 | 11  | 24  | 4  |
| 537  | 26  | 9   | 4  | 25  | 10 | 8  | 40  | 6  | 11  | 18  | 3  |
| 538  | 41  | 11  | 13 | 21  | 5  | 21 | 38  | 9  | 26  | 17  | 2  |
| 539  | 23  | 5   | 4  | 19  | 5  | 2  | 32  | 8  | 9   | 14  | 5  |
| 540  | 7   | 2   | 3  | 3   | 1  | 3  | 17  | 8  | 12  | 10  | 5  |
| 541  | 18  | 5   | 9  | 18  | 6  | 4  | 49  | 10 | 12  | 21  | 5  |
| 542  | 24  | 5   | 6  | 21  | 3  | 2  | 42  | 2  | 4   | 18  | 1  |
| 625  | 14  | 3   | 6  | 7   | 4  | 4  | 18  | 6  | 20  | 9   | 5  |
| 627  | 38  | 12  | 10 | 47  | 1  | 2  | 69  | 13 | 10  | 38  | 3  |
| 800  | 53  | 14  | 11 | 38  | 6  | 23 | 28  | 3  | 8   | 12  | 2  |
| 801  | 34  | 22  | 7  | 9   | 7  | 22 | 65  | 23 | 31  | 9   | 4  |
| 900  | 11  | 6   | 8  | 15  | 3  | 2  | 36  | 4  | 8   | 12  | 3  |
| 1001 | 11  | 2   | 3  | 9   | 7  | 2  | 24  | 10 | 24  | 8   | 5  |
| 1002 | 25  | 7   | 8  | 23  | 8  | 11 | 59  | 14 | 2   | 18  | 1  |
| 1003 | 20  | 4   | 4  | 15  | 2  | 4  | 74  | 9  | 23  | 18  | 2  |
| 1004 | 63  | 5   | 8  | 28  | 5  | 34 | 229 | 42 | 118 | 247 | 46 |
| 1005 | 25  | 5   | 8  | 16  | 4  | 4  | 65  | 10 | 18  | 17  | 4  |
| 1006 | 9   | 2   | 7  | 5   | 2  | 1  | 24  | 12 | 30  | 4   | 3  |
| 1007 | 14  | 2   | 6  | 18  | 4  | 4  | 56  | 18 | 20  | 16  | 6  |
| 1008 | 31  | 12  | 8  | 32  | 5  | 6  | 59  | 6  | 16  | 23  | 3  |
| 1009 | 21  | 3   | 21 | 16  | 1  | 7  | 45  | 15 | 33  | 21  | 5  |
| 1010 | 29  | 5   | 17 | 34  | 11 | 9  | 33  | 6  | 22  | 13  | 2  |
| 1011 | 13  | 2   | 9  | 6   | 2  | 3  | 4   | 2  | 25  | 6   | 3  |
| 1012 | 26  | 8   | 5  | 22  | 4  | 7  | 45  | 14 | 30  | 16  | 6  |
| 1013 | 29  | 7   | 3  | 31  | 7  | 3  | 51  | 13 | 11  | 27  | 4  |
| 1014 | 26  | 6   | 18 | 16  | 2  | 26 | 64  | 38 | 16  | 16  | 5  |
| 1015 | 30  | 10  | 2  | 20  | 5  | 7  | 49  | 24 | 11  | 8   | 2  |
| 1016 | 40  | 6   | 5  | 8   | 2  | 1  | 72  | 58 | 33  | 17  | 14 |
| 1017 | 22  | 5   | 3  | 17  | 2  | 6  | 32  | 6  | 16  | 18  | 9  |

|      |      |     |     |     |    |    |      |      |     |      |     |
|------|------|-----|-----|-----|----|----|------|------|-----|------|-----|
| 1018 | 20   | 6   | 4   | 21  | 5  | 5  | 42   | 6    | 1   | 14   | 2   |
| 1019 | 18   | 2   | 2   | 15  | 3  | 5  | 28   | 7    | 10  | 14   | 2   |
| 1020 | 20   | 3   | 10  | 20  | 2  | 7  | 39   | 8    | 6   | 16   | 4   |
| 1021 | 83   | 23  | 53  | 5   | 2  | 4  | 56   | 26   | 14  | 15   | 7   |
| 1022 | 13   | 3   | 3   | 17  | 4  | 2  | 38   | 11   | 10  | 17   | 6   |
| 1023 | 20   | 7   | 10  | 22  | 9  | 2  | 54   | 3    | 4   | 22   | 2   |
| 1024 | 22   | 4   | 15  | 16  | 5  | 6  | 41   | 6    | 7   | 15   | 1   |
| 1025 | 27   | 4   | 22  | 19  | 4  | 28 | 64   | 18   | 14  | 15   | 1   |
| 1026 | 9    | 2   | 1   | 5   | 2  | 2  | 31   | 15   | 9   | 11   | 6   |
| 1027 | 20   | 5   | 4   | 16  | 5  | 4  | 58   | 4    | 26  | 14   | 4   |
| 1201 | 24   | 10  | 3   | 23  | 8  | 3  | 39   | 11   | 10  | 16   | 5   |
| 1202 | 24   | 2   | 10  | 17  | 1  | 2  | 50   | 17   | 36  | 21   | 6   |
| 1203 | 23   | 6   | 7   | 18  | 3  | 17 | 42   | 8    | 10  | 12   | 6   |
| 1204 | 15   | 3   | 5   | 3   | 1  | 1  | 28   | 12   | 11  | 9    | 4   |
| 1205 | 18   | 6   | 8   | 19  | 4  | 5  | 56   | 8    | 12  | 21   | 7   |
| 1206 | 24   | 9   | 12  | 23  | 8  | 10 | 52   | 16   | 10  | 18   | 7   |
| 1207 | 23   | 8   | 26  | 23  | 11 | 3  | 60   | 29   | 37  | 22   | 10  |
| 1208 | 4764 | 308 | 732 | 192 | 2  | 11 | 445  | 85   | 43  | 45   | 6   |
| 1209 | 9    | 2   | 2   | 4   | 2  | 1  | 23   | 5    | 15  | 9    | 6   |
| 1210 | 15   | 4   | 4   | 16  | 4  | 2  | 55   | 19   | 8   | 13   | 2   |
| 1211 | 21   | 5   | 11  | 19  | 3  | 5  | 59   | 13   | 5   | 15   | 1   |
| 1212 | 46   | 10  | 23  | 20  | 4  | 5  | 338  | 24   | 55  | 23   | 3   |
| 1213 | 22   | 4   | 13  | 18  | 1  | 12 | 51   | 9    | 19  | 16   | 5   |
| 1214 | 14   | 7   | 3   | 3   | 1  | 1  | 46   | 27   | 42  | 6    | 4   |
| 1215 | 17   | 2   | 5   | 20  | 4  | 9  | 51   | 6    | 10  | 16   | 6   |
| 1216 | 21   | 7   | 6   | 18  | 4  | 6  | 47   | 7    | 3   | 18   | 5   |
| 1217 | 42   | 2   | 1   | 22  | 5  | 25 | 53   | 16   | 36  | 29   | 11  |
| 1218 | 49   | 27  | 34  | 27  | 11 | 22 | 36   | 7    | 7   | 16   | 7   |
| 1219 | 22   | 10  | 22  | 8   | 4  | 23 | 14   | 11   | 25  | 7    | 2   |
| 1220 | 572  | 68  | 71  | 108 | 10 | 4  | 7684 | 2033 | 405 | 3959 | 818 |
| 1221 | 26   | 6   | 3   | 29  | 9  | 24 | 48   | 23   | 7   | 14   | 4   |
| 1222 | 42   | 10  | 16  | 22  | 9  | 49 | 3412 | 972  | 357 | 441  | 123 |
| 1223 | 34   | 14  | 3   | 22  | 9  | 3  | 43   | 24   | 13  | 10   | 2   |
| 1224 | 19   | 6   | 3   | 8   | 5  | 2  | 17   | 10   | 8   | 10   | 6   |
| 1225 | 26   | 9   | 7   | 20  | 5  | 5  | 46   | 22   | 18  | 16   | 2   |
| 1226 | 20   | 5   | 13  | 19  | 2  | 3  | 61   | 12   | 13  | 15   | 2   |
| 1230 | 22   | 4   | 6   | 23  | 5  | 20 | 35   | 10   | 20  | 13   | 2   |
| 1231 | 22   | 5   | 11  | 19  | 7  | 5  | 40   | 12   | 2   | 11   | 2   |
| 1232 | 17   | 4   | 6   | 6   | 1  | 0  | 41   | 27   | 3   | 12   | 8   |
| 1233 | 14   | 3   | 6   | 21  | 6  | 8  | 33   | 7    | 9   | 15   | 4   |
| 1234 | 13   | 2   | 2   | 19  | 5  | 6  | 56   | 7    | 9   | 17   | 4   |
| 1238 | 15   | 4   | 3   | 6   | 2  | 1  | 34   | 12   | 22  | 10   | 4   |
| 1239 | 17   | 3   | 2   | 18  | 4  | 6  | 54   | 10   | 6   | 18   | 2   |
| 1240 | 18   | 4   | 4   | 13  | 2  | 4  | 65   | 12   | 20  | 19   | 5   |
| 1241 | 22   | 3   | 22  | 13  | 3  | 12 | 44   | 5    | 37  | 20   | 6   |
| 1401 | 29   | 10  | 13  | 18  | 2  | 16 | 62   | 25   | 14  | 14   | 5   |
| 1402 | 12   | 5   | 4   | 8   | 4  | 3  | 25   | 20   | 7   | 9    | 6   |
| 1403 | 19   | 2   | 5   | 15  | 3  | 15 | 53   | 4    | 55  | 25   | 8   |
| 1404 | 19   | 7   | 4   | 19  | 5  | 3  | 57   | 8    | 12  | 18   | 6   |
| 1405 | 30   | 7   | 16  | 17  | 2  | 3  | 182  | 53   | 37  | 37   | 11  |

|      |     |     |     |    |    |     |     |     |     |     |     |
|------|-----|-----|-----|----|----|-----|-----|-----|-----|-----|-----|
| 1406 | 30  | 4   | 9   | 22 | 7  | 4   | 36  | 1   | 12  | 13  | 2   |
| 1407 | 14  | 6   | 5   | 6  | 3  | 2   | 23  | 10  | 16  | 5   | 3   |
| 1408 | 17  | 2   | 9   | 22 | 4  | 8   | 55  | 17  | 18  | 18  | 5   |
| 1409 | 19  | 4   | 6   | 20 | 3  | 6   | 46  | 3   | 2   | 13  | 2   |
| 1410 | 33  | 9   | 10  | 20 | 3  | 1   | 51  | 6   | 30  | 18  | 3   |
| 1412 | 28  | 3   | 6   | 17 | 2  | 8   | 34  | 6   | 7   | 15  | 3   |
| 1413 | 17  | 4   | 8   | 5  | 1  | 1   | 41  | 23  | 19  | 8   | 6   |
| 1416 | 825 | 108 | 56  | 16 | 6  | 4   | 93  | 26  | 23  | 36  | 12  |
| 1418 | 35  | 8   | 61  | 26 | 7  | 6   | 62  | 11  | 3   | 16  | 5   |
| 1501 | 34  | 6   | 9   | 19 | 7  | 2   | 220 | 38  | 46  | 38  | 12  |
| 1601 | 226 | 27  | 34  | 94 | 33 | 20  | 97  | 10  | 9   | 42  | 8   |
| 1602 | 81  | 45  | 74  | 6  | 2  | 6   | 33  | 28  | 17  | 7   | 3   |
| 1603 | 24  | 8   | 13  | 29 | 9  | 62  | 43  | 29  | 15  | 18  | 10  |
| 1605 | 26  | 12  | 49  | 22 | 4  | 63  | 59  | 19  | 41  | 18  | 9   |
| 1606 | 284 | 70  | 46  | 25 | 6  | 5   | 274 | 109 | 34  | 450 | 37  |
| 1607 | 37  | 14  | 20  | 28 | 17 | 8   | 44  | 21  | 12  | 17  | 7   |
| 1608 | 28  | 4   | 16  | 44 | 6  | 5   | 39  | 17  | 13  | 20  | 3   |
| 1609 | 100 | 25  | 35  | 71 | 10 | 5   | 107 | 14  | 153 | 74  | 30  |
| 1610 | 268 | 31  | 44  | 65 | 6  | 36  | 615 | 127 | 84  | 345 | 103 |
| 1611 | 34  | 14  | 19  | 39 | 8  | 16  | 75  | 28  | 6   | 22  | 9   |
| 1613 | 59  | 17  | 10  | 49 | 11 | 9   | 72  | 11  | 6   | 37  | 11  |
| 1614 | 61  | 17  | 15  | 55 | 13 | 15  | 114 | 10  | 7   | 44  | 3   |
| 1615 | 40  | 8   | 9   | 40 | 13 | 39  | 77  | 16  | 52  | 52  | 16  |
| 1616 | 21  | 5   | 10  | 21 | 3  | 9   | 33  | 4   | 24  | 16  | 4   |
| 1617 | 16  | 4   | 4   | 8  | 1  | 3   | 29  | 12  | 10  | 10  | 7   |
| 1618 | 20  | 5   | 2   | 20 | 1  | 3   | 49  | 10  | 10  | 21  | 3   |
| 1701 | 18  | 3   | 4   | 18 | 4  | 5   | 46  | 12  | 8   | 15  | 2   |
| 1702 | 32  | 3   | 10  | 15 | 0  | 2   | 36  | 3   | 14  | 26  | 5   |
| 1703 | 25  | 6   | 9   | 23 | 4  | 5   | 49  | 5   | 6   | 17  | 2   |
| 1705 | 40  | 12  | 9   | 26 | 4  | 11  | 49  | 22  | 10  | 11  | 5   |
| 1706 | 26  | 7   | 8   | 20 | 5  | 6   | 59  | 18  | 10  | 19  | 6   |
| 1707 | 26  | 12  | 7   | 18 | 6  | 2   | 58  | 11  | 12  | 31  | 3   |
| 1801 | 34  | 7   | 8   | 34 | 5  | 15  | 71  | 19  | 33  | 37  | 12  |
| 1802 | 27  | 3   | 4   | 21 | 6  | 3   | 51  | 6   | 6   | 20  | 6   |
| 1804 | 28  | 5   | 10  | 9  | 6  | 5   | 234 | 37  | 125 | 37  | 27  |
| 1806 | 19  | 5   | 10  | 18 | 1  | 7   | 63  | 19  | 12  | 17  | 6   |
| 1807 | 22  | 3   | 4   | 22 | 5  | 4   | 67  | 11  | 5   | 21  | 9   |
| 1808 | 134 | 27  | 39  | 23 | 2  | 2   | 104 | 6   | 27  | 50  | 7   |
| 1809 | 27  | 4   | 8   | 25 | 2  | 0   | 58  | 11  | 7   | 21  | 8   |
| 1810 | 26  | 4   | 6   | 6  | 3  | 4   | 41  | 20  | 26  | 15  | 12  |
| 2001 | 18  | 8   | 2   | 17 | 3  | 5   | 40  | 9   | 14  | 15  | 3   |
| 2002 | 17  | 2   | 4   | 21 | 3  | 5   | 59  | 16  | 14  | 17  | 1   |
| 2003 | 24  | 4   | 10  | 21 | 8  | 19  | 56  | 17  | 39  | 20  | 6   |
| 2004 | 22  | 2   | 11  | 18 | 2  | 5   | 46  | 13  | 19  | 17  | 4   |
| 2005 | 13  | 3   | 1   | 10 | 5  | 112 | 28  | 21  | 15  | 9   | 5   |
| 2006 | 41  | 25  | 123 | 34 | 8  | 293 | 37  | 16  | 13  | 10  | 3   |
| 2007 | 29  | 9   | 61  | 29 | 5  | 7   | 60  | 19  | 6   | 16  | 2   |
| 2008 | 21  | 4   | 3   | 19 | 5  | 166 | 46  | 17  | 30  | 21  | 14  |
| 2009 | 29  | 5   | 7   | 21 | 2  | 5   | 46  | 14  | 21  | 13  | 4   |
| 2010 | 18  | 4   | 3   | 9  | 1  | 5   | 23  | 14  | 12  | 12  | 6   |

|      |     |    |     |    |    |     |      |     |     |     |    |
|------|-----|----|-----|----|----|-----|------|-----|-----|-----|----|
| 2011 | 22  | 10 | 10  | 23 | 3  | 6   | 48   | 20  | 21  | 14  | 4  |
| 2012 | 33  | 9  | 19  | 26 | 3  | 6   | 58   | 18  | 31  | 20  | 4  |
| 2013 | 56  | 10 | 13  | 19 | 1  | 4   | 32   | 11  | 15  | 16  | 1  |
| 2101 | 55  | 11 | 4   | 27 | 7  | 2   | 3250 | 690 | 559 | 157 | 34 |
| 2102 | 26  | 13 | 2   | 5  | 3  | 9   | 32   | 16  | 12  | 11  | 5  |
| 2103 | 35  | 17 | 10  | 35 | 9  | 7   | 53   | 11  | 7   | 18  | 7  |
| 2104 | 28  | 9  | 11  | 21 | 4  | 6   | 61   | 5   | 13  | 21  | 4  |
| 2105 | 348 | 66 | 570 | 47 | 12 | 870 | 273  | 95  | 62  | 36  | 15 |
| 2106 | 31  | 10 | 9   | 30 | 11 | 11  | 52   | 4   | 8   | 17  | 4  |
| 2107 | 15  | 4  | 5   | 6  | 1  | 1   | 28   | 18  | 7   | 11  | 4  |
| 2201 | 25  | 6  | 7   | 24 | 5  | 2   | 50   | 18  | 29  | 19  | 10 |
| 2202 | 24  | 6  | 13  | 16 | 4  | 12  | 62   | 10  | 8   | 19  | 6  |
| 2203 | 29  | 7  | 4   | 20 | 1  | 3   | 43   | 10  | 24  | 20  | 4  |
| 2204 | 25  | 4  | 10  | 25 | 8  | 5   | 48   | 8   | 13  | 12  | 3  |
| 2205 | 27  | 8  | 9   | 16 | 8  | 11  | 116  | 74  | 21  | 41  | 36 |
| 2206 | 14  | 0  | 8   | 21 | 1  | 16  | 53   | 14  | 9   | 22  | 9  |
| 2207 | 23  | 6  | 3   | 22 | 6  | 4   | 84   | 10  | 15  | 20  | 4  |
| 2208 | 27  | 8  | 4   | 15 | 2  | 7   | 52   | 11  | 9   | 19  | 3  |
| 2209 | 34  | 7  | 4   | 20 | 3  | 7   | 55   | 21  | 6   | 20  | 4  |
| 2210 | 17  | 6  | 6   | 7  | 3  | 10  | 33   | 10  | 11  | 14  | 8  |
| 2211 | 21  | 7  | 2   | 22 | 4  | 3   | 47   | 8   | 9   | 18  | 2  |
| 2212 | 24  | 6  | 11  | 18 | 3  | 11  | 69   | 6   | 8   | 17  | 3  |
| 3001 | 19  | 5  | 7   | 9  | 3  | 1   | 37   | 18  | 8   | 7   | 4  |
| 3301 | 18  | 4  | 2   | 23 | 6  | 2   | 44   | 6   | 21  | 17  | 6  |
| 3302 | 25  | 3  | 11  | 30 | 4  | 1   | 51   | 13  | 13  | 18  | 6  |
| 3401 | 26  | 7  | 25  | 20 | 4  | 4   | 46   | 10  | 47  | 21  | 5  |
| 9001 | 37  | 8  | 8   | 22 | 5  | 9   | 97   | 9   | 9   | 38  | 19 |
| 9002 | 21  | 8  | 645 | 13 | 6  | 579 | 18   | 14  | 6   | 10  | 6  |
| 9003 | 33  | 8  | 17  | 31 | 2  | 6   | 44   | 9   | 10  | 15  | 5  |

Supplementary Table 3.4 represents all fluorescent signals (0-65535 RFU, relative fluorescent units) for groups of mice contacted to *Bacteroides thetaiotaomicron* strain VPI-5482 (ATCC 29148)

| Mouse ID | 4.1    |        |        | 4.2    |        |        | 4.3    |        |        | 4.4    |        |  |
|----------|--------|--------|--------|--------|--------|--------|--------|--------|--------|--------|--------|--|
| Nr       | Median | -1st Q | +3rd Q | Median | -1st Q | +3rd Q | Median | -1st Q | +3rd Q | Median | -1st Q |  |
| 001      | 60     | 55     | 20     | 41     | 39     | 35     | 20     | 10     | 138    | 1      | 0      |  |
| 002      | 304    | 167    | 3998   | 129    | 75     | 4058   | 55     | 26     | 58     | 2      | 1      |  |
| 003      | 47     | 3      | 38     | 63     | 21     | 3988   | 44     | 39     | 69     | 108    | 81     |  |
| 004      | 63     | 22     | 437    | 5      | 2      | 4      | 2      | 1      | 0      | 1      | 0      |  |
| 005      | 28     | 22     | 33     | 39     | 30     | 2      | 5      | 1      | 4      | 5      | 3      |  |
| 006      | 22     | 20     | 29     | 33     | 27     | 2      | 15     | 7      | 46     | 5      | 4      |  |
| 007      | 63     | 22     | 110    | 37     | 29     | 65     | 18     | 12     | 8      | 2      | 1      |  |
| 009      | 20     | 8      | 2      | 4      | 1      | 1      | 4      | 2      | 3      | 1      | 0      |  |
| 010      | 4      | 2      | 1      | 31     | 19     | 29     | 10     | 7      | 7      | 6      | 4      |  |
| 011      | 1276   | 1003   | 995    | 46     | 39     | 15     | 13     | 9      | 5      | 8      | 7      |  |
| 012      | 66     | 18     | 57     | 54     | 35     | 9      | 15     | 8      | 11     | 13     | 11     |  |
| 013      | 100    | 28     | 49     | 17     | 11     | 10     | 8      | 2      | 1      | 97     | 77     |  |
| 014      | 6      | 2      | 3      | 3      | 1      | 2      | 4      | 1      | 0      | 1      | 0      |  |
| 015      | 5      | 2      | 5      | 8      | 4      | 5      | 5      | 3      | 6      | 4      | 2      |  |
| 016      | 37     | 20     | 34     | 42     | 33     | 13     | 8      | 1      | 17     | 5      | 4      |  |
| 017      | 74     | 34     | 44     | 29     | 17     | 40     | 12     | 6      | 7      | 5      | 3      |  |
| 018      | 22     | 3      | 43     | 15     | 7      | 3      | 10     | 4      | 17     | 23     | 11     |  |

|     |     |    |      |     |    |      |    |    |    |    |    |
|-----|-----|----|------|-----|----|------|----|----|----|----|----|
| 019 | 10  | 3  | 2    | 2   | 1  | 1    | 3  | 1  | 0  | 1  | 0  |
| 020 | 9   | 4  | 8    | 75  | 17 | 21   | 3  | 2  | 3  | 6  | 4  |
| 021 | 43  | 32 | 21   | 22  | 14 | 36   | 6  | 2  | 6  | 3  | 2  |
| 022 | 49  | 25 | 28   | 19  | 4  | 1    | 9  | 4  | 2  | 7  | 5  |
| 023 | 25  | 9  | 33   | 21  | 7  | 9    | 10 | 2  | 15 | 17 | 13 |
| 024 | 15  | 5  | 5    | 6   | 2  | 5    | 3  | 1  | 2  | 1  | 0  |
| 025 | 3   | 1  | 3    | 13  | 2  | 3    | 6  | 3  | 4  | 3  | 2  |
| 026 | 29  | 11 | 6    | 38  | 9  | 19   | 10 | 3  | 4  | 12 | 10 |
| 027 | 43  | 23 | 11   | 15  | 8  | 13   | 7  | 3  | 5  | 9  | 6  |
| 037 | 38  | 21 | 99   | 18  | 8  | 16   | 18 | 8  | 4  | 16 | 12 |
| 038 | 11  | 7  | 4    | 4   | 1  | 1    | 4  | 2  | 0  | 1  | 0  |
| 043 | 37  | 16 | 21   | 67  | 55 | 19   | 8  | 5  | 18 | 15 | 12 |
| 044 | 19  | 6  | 9    | 13  | 1  | 1    | 9  | 3  | 3  | 18 | 7  |
| 045 | 106 | 73 | 393  | 22  | 8  | 16   | 8  | 3  | 7  | 12 | 7  |
| 046 | 4   | 1  | 2    | 4   | 1  | 1    | 2  | 0  | 0  | 2  | 1  |
| 047 | 32  | 17 | 10   | 19  | 7  | 6    | 14 | 9  | 5  | 13 | 12 |
| 048 | 10  | 7  | 57   | 10  | 7  | 29   | 12 | 7  | 14 | 4  | 3  |
| 049 | 67  | 41 | 1755 | 13  | 7  | 11   | 11 | 6  | 5  | 2  | 1  |
| 050 | 42  | 15 | 1602 | 20  | 6  | 1632 | 6  | 4  | 2  | 15 | 11 |
| 051 | 8   | 1  | 1    | 2   | 1  | 240  | 3  | 2  | 2  | 1  | 0  |
| 052 | 9   | 4  | 4    | 17  | 8  | 6    | 4  | 1  | 4  | 4  | 2  |
| 053 | 7   | 5  | 15   | 6   | 2  | 12   | 11 | 6  | 10 | 1  | 0  |
| 054 | 48  | 9  | 5    | 15  | 5  | 10   | 10 | 6  | 8  | 8  | 7  |
| 055 | 22  | 7  | 10   | 24  | 6  | 7    | 6  | 3  | 8  | 11 | 7  |
| 071 | 111 | 12 | 18   | 4   | 1  | 1    | 2  | 1  | 1  | 1  | 0  |
| 072 | 8   | 2  | 1    | 9   | 2  | 40   | 6  | 3  | 3  | 4  | 1  |
| 073 | 15  | 11 | 13   | 13  | 10 | 12   | 9  | 6  | 6  | 1  | 0  |
| 074 | 33  | 4  | 52   | 22  | 6  | 10   | 10 | 5  | 2  | 12 | 9  |
| 075 | 49  | 27 | 23   | 10  | 3  | 14   | 7  | 2  | 3  | 21 | 13 |
| 076 | 13  | 4  | 4    | 5   | 1  | 3    | 3  | 1  | 0  | 2  | 1  |
| 077 | 34  | 14 | 24   | 219 | 63 | 195  | 7  | 3  | 5  | 5  | 1  |
| 078 | 27  | 22 | 27   | 11  | 6  | 30   | 11 | 4  | 1  | 5  | 4  |
| 080 | 82  | 18 | 11   | 35  | 12 | 26   | 20 | 12 | 18 | 13 | 3  |
| 081 | 13  | 8  | 4    | 3   | 2  | 1    | 4  | 1  | 1  | 1  | 0  |
| 082 | 5   | 3  | 2    | 8   | 5  | 2    | 7  | 3  | 4  | 7  | 3  |
| 083 | 15  | 9  | 17   | 18  | 12 | 15   | 9  | 2  | 2  | 3  | 2  |
| 084 | 46  | 14 | 11   | 31  | 13 | 11   | 6  | 3  | 4  | 18 | 15 |
| 085 | 42  | 15 | 7    | 27  | 15 | 11   | 8  | 3  | 9  | 10 | 6  |
| 086 | 13  | 4  | 14   | 4   | 2  | 4    | 4  | 2  | 1  | 1  | 0  |
| 087 | 13  | 6  | 6    | 11  | 4  | 2    | 6  | 4  | 2  | 6  | 4  |
| 088 | 68  | 44 | 12   | 28  | 12 | 19   | 9  | 5  | 22 | 10 | 5  |
| 089 | 47  | 11 | 41   | 33  | 9  | 3    | 10 | 2  | 3  | 16 | 10 |
| 092 | 10  | 3  | 3    | 8   | 4  | 3    | 4  | 1  | 1  | 2  | 1  |
| 093 | 4   | 1  | 1    | 11  | 4  | 4    | 5  | 4  | 2  | 6  | 3  |
| 094 | 23  | 13 | 8    | 22  | 11 | 5    | 8  | 3  | 3  | 7  | 6  |
| 096 | 39  | 19 | 72   | 51  | 32 | 5    | 9  | 2  | 4  | 7  | 2  |
| 097 | 31  | 13 | 26   | 13  | 5  | 4    | 3  | 2  | 3  | 1  | 0  |
| 098 | 8   | 2  | 2    | 8   | 4  | 322  | 3  | 2  | 1  | 4  | 2  |
| 099 | 19  | 14 | 576  | 5   | 2  | 1021 | 8  | 5  | 5  | 1  | 0  |
| 100 | 23  | 10 | 14   | 19  | 13 | 761  | 11 | 9  | 4  | 11 | 9  |

|     |     |     |      |      |     |      |    |    |     |      |     |
|-----|-----|-----|------|------|-----|------|----|----|-----|------|-----|
| 101 | 267 | 199 | 1040 | 24   | 10  | 893  | 6  | 3  | 4   | 7    | 4   |
| 102 | 208 | 70  | 124  | 9    | 3   | 2    | 2  | 1  | 3   | 1    | 0   |
| 103 | 6   | 2   | 4    | 6    | 1   | 0    | 8  | 3  | 12  | 5    | 2   |
| 104 | 8   | 1   | 26   | 8    | 3   | 35   | 14 | 9  | 7   | 1    | 0   |
| 105 | 122 | 11  | 37   | 22   | 9   | 10   | 13 | 8  | 1   | 4    | 2   |
| 106 | 30  | 15  | 22   | 2552 | 537 | 1582 | 8  | 4  | 3   | 16   | 12  |
| 107 | 35  | 6   | 4    | 2269 | 191 | 543  | 2  | 1  | 2   | 2    | 1   |
| 110 | 23  | 16  | 52   | 8    | 7   | 7    | 9  | 6  | 7   | 1    | 0   |
| 111 | 29  | 12  | 12   | 15   | 5   | 21   | 8  | 5  | 5   | 11   | 5   |
| 112 | 27  | 7   | 12   | 8    | 6   | 6    | 5  | 2  | 5   | 11   | 6   |
| 113 | 21  | 5   | 8    | 8    | 4   | 1    | 4  | 1  | 1   | 2    | 1   |
| 114 | 3   | 1   | 6    | 6    | 2   | 1    | 6  | 4  | 2   | 4    | 1   |
| 115 | 16  | 10  | 8    | 7    | 5   | 11   | 6  | 2  | 2   | 189  | 188 |
| 116 | 18  | 10  | 8    | 10   | 3   | 7    | 4  | 2  | 5   | 4    | 1   |
| 117 | 95  | 16  | 23   | 7    | 2   | 3    | 6  | 2  | 13  | 1496 | 618 |
| 118 | 10  | 4   | 3    | 4    | 2   | 1    | 3  | 1  | 0   | 1    | 0   |
| 119 | 6   | 2   | 1    | 6    | 2   | 2    | 6  | 3  | 2   | 8    | 4   |
| 120 | 9   | 4   | 18   | 9    | 3   | 7    | 9  | 4  | 8   | 5    | 4   |
| 121 | 31  | 13  | 7    | 17   | 6   | 7    | 5  | 3  | 2   | 13   | 11  |
| 122 | 17  | 7   | 20   | 7    | 1   | 5    | 6  | 1  | 0   | 9    | 5   |
| 123 | 3   | 1   | 4    | 2    | 1   | 2    | 3  | 2  | 0   | 1    | 0   |
| 125 | 141 | 22  | 19   | 234  | 189 | 187  | 14 | 6  | 10  | 32   | 30  |
| 126 | 66  | 32  | 50   | 28   | 9   | 10   | 12 | 5  | 1   | 19   | 9   |
| 127 | 32  | 7   | 58   | 17   | 3   | 15   | 13 | 2  | 20  | 18   | 10  |
| 128 | 19  | 9   | 10   | 6    | 2   | 5    | 4  | 2  | 1   | 1    | 0   |
| 129 | 10  | 5   | 1    | 25   | 15  | 52   | 6  | 2  | 9   | 9    | 5   |
| 130 | 28  | 15  | 6    | 24   | 11  | 8    | 9  | 3  | 2   | 12   | 9   |
| 131 | 61  | 48  | 10   | 25   | 6   | 5    | 17 | 3  | 3   | 51   | 24  |
| 132 | 15  | 5   | 35   | 11   | 2   | 4    | 11 | 5  | 6   | 9    | 4   |
| 133 | 6   | 2   | 0    | 3    | 1   | 2    | 3  | 1  | 1   | 1    | 0   |
| 134 | 8   | 3   | 4    | 10   | 4   | 114  | 4  | 2  | 2   | 2    | 1   |
| 135 | 6   | 3   | 35   | 7    | 3   | 13   | 11 | 7  | 2   | 3    | 2   |
| 136 | 87  | 49  | 405  | 33   | 13  | 432  | 15 | 10 | 6   | 2    | 1   |
| 137 | 40  | 11  | 325  | 20   | 11  | 367  | 5  | 3  | 3   | 13   | 7   |
| 138 | 11  | 2   | 2    | 3    | 1   | 1    | 3  | 2  | 1   | 1    | 0   |
| 139 | 8   | 4   | 3    | 6    | 2   | 1    | 8  | 1  | 6   | 5    | 1   |
| 140 | 22  | 11  | 136  | 25   | 12  | 104  | 23 | 13 | 101 | 65   | 64  |
| 142 | 33  | 9   | 16   | 11   | 3   | 5    | 7  | 0  | 5   | 18   | 12  |
| 143 | 19  | 6   | 4    | 4    | 2   | 3    | 3  | 1  | 0   | 2    | 1   |
| 144 | 8   | 5   | 8    | 7    | 2   | 3    | 11 | 3  | 2   | 4    | 2   |
| 145 | 14  | 7   | 16   | 9    | 2   | 25   | 11 | 4  | 2   | 1    | 0   |
| 146 | 49  | 13  | 42   | 34   | 19  | 14   | 8  | 3  | 4   | 13   | 10  |
| 149 | 12  | 6   | 1    | 50   | 42  | 62   | 5  | 1  | 1   | 9    | 3   |
| 150 | 30  | 22  | 68   | 24   | 12  | 97   | 9  | 4  | 1   | 4    | 3   |
| 151 | 42  | 17  | 20   | 18   | 3   | 2    | 13 | 8  | 2   | 6    | 4   |
| 152 | 28  | 6   | 22   | 14   | 6   | 10   | 9  | 3  | 2   | 12   | 5   |
| 153 | 33  | 15  | 9    | 4    | 2   | 2    | 2  | 1  | 1   | 1    | 0   |
| 154 | 7   | 3   | 3    | 12   | 4   | 6    | 8  | 4  | 9   | 9    | 4   |
| 156 | 29  | 11  | 17   | 46   | 7   | 7    | 7  | 4  | 2   | 12   | 7   |
| 158 | 23  | 9   | 23   | 6    | 3   | 2    | 3  | 2  | 1   | 1    | 0   |



|     |       |      |      |       |       |       |    |    |    |      |     |
|-----|-------|------|------|-------|-------|-------|----|----|----|------|-----|
| 159 | 7     | 2    | 7    | 11    | 4     | 6     | 5  | 2  | 2  | 14   | 5   |
| 160 | 33    | 15   | 13   | 31    | 18    | 8     | 8  | 3  | 8  | 5    | 4   |
| 161 | 53    | 36   | 10   | 29    | 8     | 2     | 6  | 2  | 2  | 13   | 6   |
| 162 | 79    | 33   | 54   | 43    | 7     | 39    | 9  | 2  | 5  | 14   | 8   |
| 164 | 10    | 7    | 16   | 11    | 2     | 10    | 4  | 0  | 6  | 6    | 2   |
| 165 | 57    | 33   | 55   | 27    | 18    | 10    | 8  | 3  | 2  | 8    | 6   |
| 166 | 1109  | 388  | 32   | 58    | 29    | 14    | 10 | 2  | 8  | 89   | 48  |
| 167 | 11    | 3    | 13   | 13    | 6     | 6     | 7  | 2  | 6  | 5    | 1   |
| 168 | 15    | 9    | 7    | 5     | 2     | 1     | 3  | 1  | 3  | 1    | 0   |
| 169 | 13    | 4    | 40   | 9     | 4     | 9     | 5  | 3  | 1  | 4    | 2   |
| 170 | 35    | 20   | 10   | 25    | 19    | 142   | 14 | 10 | 11 | 1    | 0   |
| 171 | 21    | 5    | 131  | 14    | 4     | 142   | 8  | 5  | 4  | 7    | 6   |
| 173 | 35    | 11   | 64   | 30    | 20    | 86    | 4  | 2  | 2  | 13   | 6   |
| 174 | 24    | 2    | 3    | 3     | 1     | 1     | 4  | 3  | 1  | 1    | 0   |
| 175 | 13    | 7    | 17   | 9     | 3     | 6     | 7  | 2  | 11 | 5    | 3   |
| 176 | 61    | 36   | 12   | 23    | 19    | 17    | 11 | 9  | 6  | 1    | 0   |
| 177 | 281   | 57   | 66   | 241   | 48    | 190   | 14 | 6  | 7  | 47   | 45  |
| 178 | 101   | 16   | 5    | 22    | 12    | 6     | 15 | 6  | 8  | 17   | 11  |
| 179 | 16    | 9    | 3    | 33    | 6     | 19    | 3  | 1  | 3  | 2    | 0   |
| 180 | 12    | 6    | 9    | 21    | 14    | 15    | 8  | 4  | 8  | 5    | 3   |
| 181 | 566   | 144  | 46   | 827   | 453   | 131   | 16 | 12 | 14 | 9    | 8   |
| 182 | 45    | 12   | 11   | 21    | 9     | 21    | 7  | 1  | 2  | 11   | 6   |
| 183 | 37    | 5    | 16   | 23    | 17    | 24    | 8  | 2  | 7  | 8    | 5   |
| 184 | 15    | 7    | 8    | 2     | 0     | 3     | 3  | 1  | 2  | 1    | 0   |
| 186 | 36    | 12   | 13   | 34    | 20    | 8     | 8  | 4  | 7  | 1    | 0   |
| 187 | 28    | 7    | 17   | 23    | 10    | 8     | 7  | 4  | 3  | 7    | 2   |
| 188 | 21    | 5    | 5    | 5     | 3     | 7     | 5  | 2  | 2  | 6    | 5   |
| 189 | 20    | 7    | 10   | 5     | 1     | 1     | 3  | 1  | 1  | 2    | 1   |
| 190 | 7     | 3    | 3    | 16    | 8     | 10    | 6  | 2  | 14 | 9    | 4   |
| 191 | 40    | 10   | 8    | 24    | 6     | 8     | 8  | 1  | 3  | 3    | 2   |
| 192 | 239   | 32   | 37   | 54067 | 14779 | 10022 | 16 | 7  | 3  | 119  | 113 |
| 193 | 827   | 216  | 151  | 6714  | 3380  | 3751  | 14 | 4  | 3  | 414  | 303 |
| 194 | 20    | 12   | 32   | 6295  | 1340  | 443   | 2  | 1  | 1  | 1    | 0   |
| 195 | 10    | 7    | 6    | 15    | 6     | 19    | 7  | 4  | 1  | 11   | 8   |
| 196 | 28    | 3    | 7    | 29    | 12    | 10    | 4  | 1  | 11 | 9    | 7   |
| 197 | 20973 | 2802 | 2972 | 43229 | 12037 | 18330 | 26 | 10 | 12 | 1828 | 554 |
| 198 | 71    | 47   | 34   | 13    | 9     | 8     | 9  | 1  | 3  | 10   | 6   |
| 199 | 11    | 3    | 7    | 2     | 1     | 1     | 2  | 0  | 0  | 2    | 1   |
| 200 | 12    | 7    | 3    | 11    | 3     | 6     | 6  | 3  | 2  | 7    | 3   |
| 201 | 70    | 30   | 25   | 58    | 25    | 30    | 9  | 4  | 10 | 11   | 8   |
| 202 | 2187  | 582  | 322  | 62358 | 9558  | 3177  | 29 | 5  | 4  | 653  | 364 |
| 203 | 19    | 11   | 9    | 21    | 16    | 4     | 11 | 4  | 9  | 10   | 1   |
| 204 | 7     | 5    | 3    | 3     | 2     | 3     | 2  | 0  | 1  | 3    | 1   |
| 205 | 21    | 12   | 6    | 15    | 6     | 9     | 6  | 3  | 3  | 4    | 3   |
| 206 | 27    | 14   | 19   | 22    | 12    | 21    | 16 | 11 | 3  | 5    | 4   |
| 207 | 52    | 15   | 16   | 24    | 5     | 4     | 12 | 6  | 1  | 8    | 7   |
| 215 | 27    | 8    | 66   | 21    | 6     | 49    | 10 | 3  | 12 | 15   | 12  |
| 216 | 80    | 1    | 6    | 9     | 4     | 3     | 1  | 0  | 2  | 2    | 1   |
| 217 | 50    | 42   | 41   | 43    | 32    | 39    | 13 | 5  | 8  | 3    | 1   |
| 219 | 25    | 12   | 6    | 18    | 8     | 11    | 9  | 5  | 5  | 3    | 2   |

|     |       |      |      |     |     |     |    |    |    |      |      |
|-----|-------|------|------|-----|-----|-----|----|----|----|------|------|
| 220 | 98    | 66   | 22   | 87  | 53  | 78  | 10 | 4  | 8  | 19   | 14   |
| 221 | 17    | 8    | 8    | 10  | 4   | 5   | 7  | 1  | 2  | 14   | 10   |
| 222 | 41    | 29   | 11   | 13  | 4   | 8   | 4  | 1  | 2  | 2    | 1    |
| 223 | 12    | 2    | 4    | 10  | 4   | 5   | 7  | 2  | 4  | 5    | 3    |
| 225 | 58    | 33   | 13   | 43  | 17  | 13  | 12 | 2  | 6  | 11   | 6    |
| 226 | 30    | 16   | 14   | 12  | 3   | 6   | 13 | 5  | 9  | 11   | 8    |
| 227 | 33    | 12   | 8    | 7   | 1   | 4   | 6  | 3  | 1  | 1    | 0    |
| 228 | 14    | 6    | 43   | 23  | 14  | 7   | 7  | 1  | 4  | 6    | 4    |
| 229 | 14    | 5    | 2    | 12  | 4   | 7   | 8  | 4  | 5  | 9    | 8    |
| 231 | 40    | 25   | 15   | 21  | 16  | 7   | 10 | 5  | 6  | 11   | 5    |
| 232 | 40    | 14   | 16   | 18  | 10  | 7   | 17 | 9  | 8  | 11   | 8    |
| 233 | 65    | 30   | 13   | 14  | 6   | 16  | 3  | 1  | 1  | 1    | 0    |
| 234 | 105   | 64   | 79   | 50  | 34  | 15  | 9  | 3  | 7  | 8    | 6    |
| 235 | 62    | 29   | 4    | 64  | 25  | 17  | 8  | 4  | 5  | 5    | 4    |
| 236 | 26    | 11   | 6    | 9   | 5   | 5   | 7  | 3  | 5  | 16   | 11   |
| 237 | 19    | 1    | 4    | 6   | 2   | 13  | 16 | 4  | 9  | 17   | 12   |
| 239 | 24    | 18   | 16   | 30  | 19  | 4   | 5  | 2  | 0  | 8    | 5    |
| 240 | 117   | 47   | 47   | 16  | 8   | 4   | 8  | 4  | 5  | 8    | 6    |
| 241 | 34    | 24   | 14   | 7   | 2   | 3   | 6  | 4  | 2  | 11   | 5    |
| 242 | 28    | 14   | 8    | 10  | 7   | 14  | 11 | 4  | 6  | 9    | 6    |
| 243 | 19    | 10   | 11   | 4   | 2   | 2   | 4  | 1  | 1  | 2    | 1    |
| 245 | 18    | 6    | 11   | 48  | 30  | 31  | 7  | 3  | 18 | 5    | 1    |
| 246 | 41    | 10   | 12   | 40  | 3   | 2   | 10 | 5  | 7  | 11   | 6    |
| 247 | 17    | 11   | 1    | 9   | 4   | 3   | 9  | 3  | 5  | 9    | 6    |
| 248 | 45    | 9    | 31   | 43  | 22  | 56  | 13 | 7  | 3  | 11   | 4    |
| 249 | 13    | 5    | 8    | 6   | 3   | 1   | 2  | 1  | 2  | 2    | 1    |
| 250 | 9     | 2    | 4    | 8   | 4   | 6   | 8  | 4  | 2  | 5    | 4    |
| 251 | 60    | 34   | 219  | 126 | 79  | 37  | 17 | 12 | 3  | 2    | 1    |
| 252 | 125   | 85   | 319  | 8   | 2   | 29  | 7  | 5  | 0  | 47   | 38   |
| 253 | 41    | 29   | 40   | 43  | 14  | 41  | 6  | 4  | 4  | 10   | 6    |
| 254 | 18    | 4    | 11   | 5   | 2   | 2   | 2  | 1  | 2  | 1    | 0    |
| 255 | 24    | 14   | 16   | 18  | 9   | 14  | 8  | 2  | 6  | 2    | 0    |
| 256 | 9335  | 8113 | 6701 | 182 | 131 | 102 | 12 | 9  | 9  | 1459 | 1415 |
| 258 | 18    | 10   | 16   | 7   | 2   | 4   | 7  | 2  | 2  | 6    | 2    |
| 259 | 54    | 22   | 14   | 31  | 21  | 24  | 14 | 3  | 12 | 25   | 17   |
| 260 | 74    | 31   | 11   | 18  | 2   | 8   | 2  | 1  | 1  | 1    | 0    |
| 261 | 85    | 49   | 11   | 22  | 8   | 6   | 9  | 3  | 28 | 6    | 5    |
| 262 | 14    | 8    | 6    | 12  | 8   | 5   | 5  | 4  | 3  | 1    | 0    |
| 263 | 22    | 9    | 4    | 9   | 3   | 5   | 8  | 4  | 1  | 10   | 3    |
| 264 | 40    | 17   | 15   | 26  | 10  | 14  | 13 | 4  | 4  | 18   | 9    |
| 266 | 33    | 19   | 3    | 22  | 12  | 22  | 9  | 3  | 9  | 2    | 1    |
| 267 | 24    | 17   | 33   | 13  | 6   | 14  | 23 | 10 | 65 | 43   | 42   |
| 268 | 17450 | 8789 | 3574 | 12  | 5   | 9   | 11 | 6  | 4  | 12   | 6    |
| 287 | 16    | 3    | 15   | 11  | 7   | 9   | 14 | 7  | 4  | 9    | 7    |
| 288 | 12    | 6    | 19   | 4   | 2   | 2   | 3  | 1  | 1  | 1    | 0    |
| 289 | 11    | 5    | 12   | 13  | 6   | 10  | 7  | 3  | 5  | 3    | 2    |
| 290 | 24    | 12   | 9    | 18  | 7   | 6   | 7  | 4  | 4  | 5    | 4    |
| 291 | 35    | 13   | 7    | 20  | 10  | 10  | 7  | 2  | 4  | 13   | 8    |
| 292 | 19    | 6    | 13   | 7   | 5   | 6   | 10 | 4  | 2  | 11   | 9    |
| 293 | 16    | 11   | 4    | 3   | 2   | 1   | 3  | 1  | 1  | 1    | 0    |

|     |     |     |    |     |     |     |     |    |    |     |    |
|-----|-----|-----|----|-----|-----|-----|-----|----|----|-----|----|
| 294 | 9   | 2   | 3  | 9   | 4   | 6   | 7   | 1  | 1  | 3   | 1  |
| 295 | 43  | 11  | 16 | 33  | 10  | 15  | 12  | 5  | 2  | 12  | 8  |
| 296 | 16  | 8   | 6  | 18  | 9   | 9   | 6   | 2  | 1  | 17  | 16 |
| 297 | 29  | 10  | 10 | 9   | 7   | 3   | 10  | 4  | 13 | 19  | 13 |
| 298 | 12  | 8   | 8  | 5   | 3   | 1   | 2   | 1  | 0  | 2   | 1  |
| 299 | 21  | 10  | 12 | 22  | 13  | 16  | 5   | 4  | 11 | 5   | 2  |
| 300 | 72  | 19  | 18 | 41  | 10  | 9   | 9   | 4  | 8  | 11  | 5  |
| 302 | 43  | 13  | 22 | 37  | 19  | 12  | 11  | 5  | 7  | 6   | 2  |
| 303 | 9   | 6   | 17 | 1   | 0   | 3   | 3   | 1  | 2  | 2   | 1  |
| 304 | 13  | 4   | 17 | 7   | 3   | 4   | 4   | 2  | 4  | 3   | 2  |
| 305 | 36  | 19  | 4  | 21  | 8   | 11  | 15  | 11 | 8  | 4   | 3  |
| 306 | 17  | 11  | 23 | 14  | 7   | 6   | 7   | 5  | 0  | 6   | 3  |
| 307 | 14  | 6   | 8  | 7   | 3   | 7   | 6   | 5  | 1  | 6   | 4  |
| 308 | 29  | 21  | 2  | 5   | 2   | 0   | 2   | 1  | 0  | 1   | 0  |
| 309 | 9   | 1   | 3  | 6   | 2   | 2   | 7   | 2  | 6  | 1   | 0  |
| 310 | 17  | 7   | 8  | 15  | 3   | 6   | 9   | 4  | 2  | 1   | 0  |
| 315 | 36  | 26  | 7  | 6   | 3   | 2   | 2   | 1  | 1  | 2   | 1  |
| 318 | 73  | 27  | 3  | 64  | 28  | 16  | 10  | 5  | 13 | 7   | 6  |
| 319 | 36  | 16  | 14 | 24  | 11  | 8   | 6   | 2  | 2  | 17  | 9  |
| 320 | 83  | 35  | 13 | 56  | 29  | 17  | 10  | 4  | 16 | 14  | 6  |
| 321 | 14  | 6   | 4  | 2   | 1   | 0   | 3   | 2  | 0  | 1   | 0  |
| 322 | 13  | 3   | 3  | 8   | 2   | 2   | 7   | 0  | 8  | 1   | 0  |
| 323 | 33  | 20  | 9  | 24  | 9   | 10  | 8   | 5  | 4  | 5   | 4  |
| 324 | 31  | 20  | 13 | 24  | 8   | 3   | 10  | 3  | 5  | 11  | 6  |
| 325 | 29  | 12  | 6  | 6   | 4   | 2   | 13  | 4  | 16 | 13  | 6  |
| 326 | 13  | 4   | 14 | 2   | 1   | 0   | 4   | 1  | 0  | 2   | 1  |
| 327 | 11  | 4   | 4  | 8   | 1   | 2   | 7   | 1  | 4  | 9   | 8  |
| 328 | 41  | 13  | 11 | 37  | 13  | 5   | 15  | 10 | 3  | 14  | 11 |
| 329 | 70  | 57  | 10 | 50  | 10  | 10  | 16  | 7  | 9  | 37  | 15 |
| 330 | 27  | 13  | 19 | 7   | 3   | 9   | 11  | 3  | 6  | 10  | 5  |
| 331 | 14  | 9   | 5  | 4   | 3   | 3   | 2   | 1  | 1  | 1   | 0  |
| 332 | 12  | 4   | 4  | 5   | 1   | 9   | 7   | 3  | 3  | 4   | 2  |
| 333 | 35  | 10  | 14 | 24  | 7   | 9   | 8   | 3  | 2  | 11  | 5  |
| 334 | 32  | 13  | 15 | 25  | 10  | 9   | 11  | 5  | 2  | 22  | 16 |
| 335 | 23  | 9   | 17 | 23  | 17  | 6   | 11  | 4  | 9  | 7   | 3  |
| 359 | 8   | 3   | 3  | 6   | 3   | 5   | 3   | 0  | 1  | 2   | 1  |
| 360 | 16  | 6   | 14 | 28  | 17  | 35  | 4   | 1  | 2  | 5   | 2  |
| 361 | 67  | 15  | 14 | 142 | 8   | 25  | 14  | 5  | 9  | 26  | 9  |
| 362 | 344 | 186 | 60 | 438 | 164 | 225 | 15  | 4  | 5  | 111 | 34 |
| 363 | 43  | 10  | 27 | 29  | 19  | 18  | 14  | 4  | 17 | 11  | 7  |
| 364 | 593 | 345 | 88 | 190 | 6   | 46  | 288 | 30 | 23 | 62  | 59 |
| 365 | 48  | 35  | 20 | 238 | 126 | 294 | 6   | 4  | 5  | 6   | 5  |
| 366 | 26  | 2   | 3  | 20  | 4   | 12  | 13  | 10 | 1  | 5   | 4  |
| 368 | 65  | 31  | 14 | 53  | 32  | 17  | 3   | 1  | 1  | 5   | 3  |
| 369 | 23  | 6   | 8  | 104 | 24  | 8   | 2   | 1  | 1  | 1   | 0  |
| 371 | 36  | 14  | 11 | 19  | 12  | 7   | 9   | 1  | 2  | 4   | 3  |
| 372 | 144 | 90  | 30 | 394 | 89  | 88  | 57  | 47 | 13 | 51  | 50 |
| 373 | 32  | 9   | 14 | 20  | 6   | 4   | 13  | 5  | 1  | 8   | 4  |
| 374 | 16  | 8   | 12 | 12  | 4   | 6   | 9   | 2  | 0  | 13  | 9  |
| 375 | 13  | 6   | 4  | 3   | 2   | 1   | 4   | 1  | 0  | 1   | 0  |

|     |     |     |     |     |     |     |     |     |    |     |     |
|-----|-----|-----|-----|-----|-----|-----|-----|-----|----|-----|-----|
| 376 | 9   | 3   | 9   | 8   | 2   | 3   | 11  | 2   | 5  | 2   | 1   |
| 377 | 13  | 7   | 5   | 9   | 4   | 3   | 11  | 5   | 2  | 3   | 2   |
| 378 | 26  | 10  | 16  | 15  | 4   | 5   | 10  | 3   | 3  | 13  | 2   |
| 379 | 15  | 11  | 3   | 12  | 6   | 15  | 14  | 7   | 1  | 7   | 4   |
| 380 | 17  | 8   | 4   | 6   | 4   | 7   | 2   | 0   | 0  | 2   | 1   |
| 381 | 48  | 22  | 19  | 22  | 8   | 27  | 7   | 2   | 9  | 5   | 4   |
| 382 | 19  | 6   | 4   | 12  | 4   | 3   | 12  | 8   | 8  | 3   | 2   |
| 383 | 22  | 6   | 8   | 13  | 2   | 5   | 9   | 3   | 1  | 10  | 4   |
| 384 | 20  | 7   | 2   | 12  | 9   | 17  | 14  | 4   | 8  | 11  | 8   |
| 386 | 50  | 17  | 14  | 61  | 29  | 15  | 7   | 3   | 2  | 3   | 2   |
| 387 | 27  | 5   | 8   | 40  | 14  | 13  | 7   | 3   | 5  | 3   | 2   |
| 388 | 46  | 14  | 10  | 28  | 5   | 9   | 12  | 7   | 8  | 17  | 11  |
| 389 | 31  | 10  | 24  | 10  | 7   | 12  | 10  | 2   | 1  | 7   | 4   |
| 390 | 27  | 11  | 11  | 2   | 1   | 1   | 2   | 0   | 1  | 1   | 0   |
| 392 | 472 | 68  | 55  | 523 | 127 | 107 | 6   | 2   | 7  | 82  | 62  |
| 394 | 35  | 19  | 10  | 10  | 1   | 4   | 6   | 3   | 2  | 14  | 9   |
| 395 | 19  | 8   | 10  | 12  | 8   | 7   | 12  | 3   | 7  | 6   | 4   |
| 396 | 270 | 84  | 99  | 27  | 7   | 7   | 6   | 3   | 1  | 127 | 104 |
| 397 | 72  | 38  | 32  | 61  | 31  | 35  | 68  | 55  | 28 | 28  | 15  |
| 398 | 206 | 11  | 20  | 150 | 17  | 8   | 45  | 17  | 21 | 64  | 33  |
| 399 | 28  | 5   | 6   | 28  | 18  | 3   | 11  | 3   | 2  | 15  | 7   |
| 401 | 5   | 2   | 3   | 2   | 0   | 1   | 2   | 0   | 1  | 2   | 1   |
| 402 | 25  | 5   | 28  | 51  | 28  | 46  | 5   | 3   | 4  | 1   | 0   |
| 403 | 36  | 15  | 3   | 53  | 22  | 19  | 16  | 8   | 2  | 6   | 5   |
| 419 | 31  | 10  | 17  | 16  | 5   | 11  | 5   | 3   | 3  | 8   | 5   |
| 420 | 28  | 14  | 9   | 4   | 1   | 12  | 3   | 2   | 3  | 8   | 6   |
| 423 | 45  | 11  | 5   | 39  | 16  | 4   | 10  | 5   | 6  | 6   | 5   |
| 425 | 42  | 11  | 9   | 29  | 4   | 3   | 10  | 6   | 1  | 8   | 4   |
| 426 | 11  | 6   | 1   | 5   | 2   | 2   | 5   | 1   | 8  | 9   | 7   |
| 428 | 21  | 6   | 4   | 20  | 3   | 2   | 9   | 4   | 5  | 4   | 3   |
| 429 | 23  | 9   | 9   | 20  | 10  | 4   | 8   | 5   | 3  | 6   | 5   |
| 431 | 11  | 4   | 6   | 7   | 3   | 65  | 12  | 6   | 8  | 7   | 2   |
| 432 | 7   | 2   | 5   | 2   | 1   | 1   | 2   | 1   | 1  | 1   | 0   |
| 433 | 15  | 2   | 1   | 18  | 8   | 5   | 6   | 2   | 4  | 2   | 1   |
| 434 | 25  | 16  | 13  | 22  | 11  | 0   | 14  | 7   | 2  | 2   | 1   |
| 435 | 73  | 13  | 21  | 25  | 6   | 10  | 11  | 5   | 1  | 29  | 19  |
| 436 | 15  | 8   | 3   | 13  | 11  | 2   | 10  | 3   | 5  | 10  | 6   |
| 437 | 179 | 49  | 50  | 44  | 11  | 24  | 9   | 6   | 1  | 1   | 0   |
| 479 | 9   | 2   | 8   | 18  | 10  | 15  | 11  | 8   | 5  | 6   | 4   |
| 480 | 241 | 87  | 50  | 781 | 283 | 132 | 104 | 95  | 11 | 107 | 104 |
| 481 | 253 | 7   | 44  | 269 | 31  | 9   | 160 | 119 | 15 | 186 | 62  |
| 483 | 37  | 6   | 5   | 9   | 8   | 17  | 16  | 5   | 14 | 16  | 11  |
| 492 | 2   | 1   | 1   | 2   | 0   | 1   | 2   | 0   | 0  | 1   | 0   |
| 493 | 940 | 420 | 431 | 18  | 8   | 10  | 8   | 4   | 5  | 55  | 36  |
| 495 | 18  | 6   | 5   | 11  | 1   | 2   | 6   | 3   | 4  | 11  | 7   |
| 496 | 24  | 8   | 8   | 17  | 7   | 3   | 10  | 1   | 2  | 21  | 11  |
| 497 | 122 | 52  | 33  | 239 | 152 | 191 | 49  | 20  | 12 | 36  | 33  |
| 498 | 6   | 4   | 3   | 2   | 1   | 1   | 3   | 1   | 1  | 2   | 1   |
| 499 | 11  | 6   | 6   | 14  | 9   | 8   | 8   | 5   | 2  | 5   | 4   |
| 501 | 15  | 7   | 7   | 10  | 2   | 2   | 7   | 5   | 1  | 2   | 1   |

|      |      |      |     |     |    |    |     |     |    |     |     |
|------|------|------|-----|-----|----|----|-----|-----|----|-----|-----|
| 502  | 47   | 22   | 39  | 7   | 4  | 1  | 8   | 4   | 8  | 5   | 2   |
| 503  | 1893 | 1536 | 932 | 4   | 2  | 4  | 6   | 4   | 7  | 207 | 130 |
| 504  | 3    | 1    | 0   | 1   | 0  | 0  | 2   | 1   | 2  | 1   | 0   |
| 505  | 18   | 7    | 11  | 22  | 13 | 12 | 9   | 1   | 1  | 1   | 0   |
| 506  | 231  | 52   | 12  | 161 | 45 | 28 | 119 | 110 | 10 | 42  | 40  |
| 527  | 21   | 7    | 4   | 11  | 4  | 1  | 7   | 4   | 0  | 8   | 2   |
| 528  | 21   | 9    | 9   | 8   | 3  | 2  | 7   | 2   | 2  | 5   | 4   |
| 529  | 9    | 5    | 1   | 1   | 0  | 0  | 2   | 1   | 2  | 1   | 0   |
| 530  | 26   | 3    | 5   | 23  | 5  | 3  | 11  | 4   | 11 | 6   | 4   |
| 531  | 29   | 13   | 16  | 21  | 6  | 9  | 12  | 6   | 4  | 8   | 7   |
| 534  | 24   | 9    | 15  | 5   | 2  | 4  | 3   | 2   | 0  | 2   | 1   |
| 535  | 18   | 9    | 1   | 9   | 4  | 6  | 11  | 4   | 8  | 5   | 4   |
| 536  | 31   | 24   | 14  | 49  | 14 | 12 | 13  | 7   | 5  | 3   | 2   |
| 537  | 32   | 7    | 4   | 30  | 8  | 14 | 9   | 3   | 4  | 19  | 7   |
| 538  | 59   | 36   | 28  | 6   | 2  | 2  | 6   | 1   | 3  | 12  | 8   |
| 539  | 5    | 2    | 3   | 2   | 1  | 2  | 3   | 2   | 1  | 2   | 1   |
| 540  | 43   | 12   | 27  | 11  | 5  | 2  | 9   | 4   | 4  | 7   | 5   |
| 541  | 185  | 60   | 82  | 15  | 3  | 4  | 11  | 6   | 2  | 13  | 12  |
| 542  | 15   | 2    | 6   | 9   | 2  | 3  | 10  | 6   | 1  | 15  | 9   |
| 625  | 21   | 4    | 4   | 18  | 9  | 25 | 9   | 5   | 8  | 4   | 2   |
| 627  | 45   | 5    | 5   | 33  | 14 | 5  | 22  | 8   | 5  | 28  | 8   |
| 800  | 16   | 10   | 16  | 2   | 1  | 5  | 2   | 0   | 1  | 1   | 0   |
| 801  | 147  | 64   | 58  | 95  | 47 | 27 | 7   | 4   | 9  | 5   | 3   |
| 900  | 20   | 4    | 7   | 12  | 1  | 3  | 8   | 3   | 11 | 12  | 7   |
| 1001 | 12   | 3    | 4   | 16  | 7  | 2  | 6   | 2   | 3  | 4   | 2   |
| 1002 | 23   | 5    | 3   | 22  | 4  | 2  | 7   | 3   | 11 | 22  | 11  |
| 1003 | 29   | 6    | 16  | 16  | 5  | 5  | 7   | 2   | 2  | 16  | 8   |
| 1004 | 71   | 14   | 35  | 37  | 13 | 6  | 7   | 1   | 12 | 7   | 6   |
| 1005 | 4    | 1    | 6   | 2   | 1  | 1  | 3   | 0   | 0  | 1   | 0   |
| 1006 | 16   | 5    | 4   | 11  | 5  | 4  | 6   | 1   | 6  | 3   | 2   |
| 1007 | 23   | 9    | 4   | 20  | 6  | 4  | 5   | 1   | 1  | 16  | 12  |
| 1008 | 29   | 6    | 13  | 17  | 5  | 4  | 8   | 1   | 3  | 23  | 10  |
| 1009 | 7    | 3    | 17  | 3   | 0  | 3  | 9   | 3   | 12 | 3   | 2   |
| 1010 | 7    | 5    | 3   | 3   | 2  | 4  | 2   | 0   | 0  | 1   | 0   |
| 1011 | 10   | 5    | 9   | 16  | 9  | 6  | 5   | 3   | 1  | 6   | 5   |
| 1012 | 39   | 9    | 6   | 19  | 10 | 10 | 8   | 3   | 3  | 12  | 9   |
| 1013 | 27   | 9    | 7   | 11  | 8  | 1  | 12  | 7   | 4  | 10  | 4   |
| 1014 | 9    | 4    | 2   | 4   | 2  | 0  | 5   | 3   | 25 | 2   | 1   |
| 1015 | 5    | 2    | 7   | 1   | 0  | 1  | 2   | 1   | 1  | 1   | 0   |
| 1016 | 46   | 25   | 32  | 60  | 28 | 24 | 6   | 3   | 3  | 13  | 12  |
| 1017 | 19   | 11   | 9   | 19  | 15 | 5  | 7   | 3   | 2  | 7   | 4   |
| 1018 | 19   | 9    | 6   | 9   | 4  | 4  | 6   | 3   | 1  | 10  | 2   |
| 1019 | 8    | 5    | 4   | 7   | 3  | 3  | 7   | 4   | 10 | 4   | 2   |
| 1020 | 5    | 2    | 5   | 1   | 0  | 0  | 3   | 1   | 0  | 1   | 0   |
| 1021 | 235  | 96   | 153 | 162 | 81 | 28 | 8   | 2   | 4  | 2   | 1   |
| 1022 | 16   | 9    | 6   | 7   | 3  | 5  | 5   | 2   | 5  | 5   | 4   |
| 1023 | 20   | 2    | 6   | 9   | 3  | 8  | 7   | 4   | 5  | 20  | 15  |
| 1024 | 6    | 2    | 5   | 5   | 2  | 5  | 6   | 2   | 9  | 6   | 4   |
| 1025 | 6    | 3    | 18  | 1   | 0  | 5  | 2   | 1   | 2  | 1   | 0   |
| 1026 | 12   | 5    | 9   | 16  | 6  | 4  | 7   | 1   | 1  | 7   | 6   |

|      |      |     |     |      |     |     |    |    |    |     |     |
|------|------|-----|-----|------|-----|-----|----|----|----|-----|-----|
| 1027 | 24   | 10  | 7   | 18   | 6   | 6   | 8  | 6  | 3  | 9   | 8   |
| 1201 | 23   | 5   | 3   | 7    | 2   | 3   | 7  | 2  | 2  | 14  | 5   |
| 1202 | 9    | 3   | 2   | 3    | 2   | 1   | 4  | 0  | 0  | 3   | 1   |
| 1203 | 5    | 4   | 2   | 1    | 0   | 1   | 1  | 0  | 1  | 1   | 0   |
| 1204 | 28   | 19  | 11  | 19   | 5   | 5   | 7  | 0  | 2  | 5   | 3   |
| 1205 | 25   | 11  | 7   | 22   | 9   | 2   | 10 | 4  | 2  | 12  | 9   |
| 1206 | 25   | 8   | 16  | 15   | 3   | 6   | 7  | 3  | 3  | 14  | 6   |
| 1207 | 8    | 4   | 2   | 4    | 2   | 4   | 5  | 1  | 6  | 3   | 2   |
| 1208 | 455  | 214 | 239 | 30   | 8   | 6   | 2  | 1  | 0  | 1   | 0   |
| 1209 | 20   | 8   | 1   | 10   | 3   | 4   | 7  | 3  | 2  | 6   | 4   |
| 1210 | 19   | 7   | 8   | 14   | 6   | 3   | 8  | 3  | 1  | 9   | 4   |
| 1211 | 26   | 12  | 3   | 12   | 5   | 3   | 4  | 1  | 3  | 12  | 4   |
| 1212 | 44   | 15  | 3   | 12   | 8   | 16  | 5  | 1  | 1  | 7   | 4   |
| 1213 | 2    | 0   | 2   | 2    | 1   | 1   | 2  | 0  | 1  | 1   | 0   |
| 1214 | 15   | 2   | 4   | 11   | 3   | 7   | 7  | 3  | 2  | 3   | 1   |
| 1215 | 23   | 7   | 7   | 19   | 2   | 22  | 7  | 2  | 2  | 18  | 10  |
| 1216 | 18   | 5   | 5   | 10   | 3   | 5   | 5  | 1  | 1  | 12  | 9   |
| 1217 | 20   | 6   | 20  | 7    | 3   | 2   | 5  | 1  | 1  | 9   | 6   |
| 1218 | 3    | 1   | 3   | 2    | 1   | 5   | 2  | 0  | 1  | 2   | 1   |
| 1219 | 20   | 12  | 19  | 40   | 27  | 22  | 5  | 2  | 2  | 1   | 0   |
| 1220 | 1540 | 210 | 150 | 1498 | 484 | 373 | 9  | 4  | 3  | 372 | 363 |
| 1221 | 24   | 15  | 20  | 3    | 1   | 1   | 5  | 2  | 2  | 7   | 4   |
| 1222 | 6    | 1   | 4   | 11   | 2   | 23  | 3  | 1  | 10 | 13  | 12  |
| 1223 | 6    | 3   | 4   | 1    | 0   | 0   | 1  | 0  | 1  | 1   | 0   |
| 1224 | 15   | 8   | 7   | 21   | 9   | 8   | 7  | 2  | 1  | 3   | 2   |
| 1225 | 28   | 9   | 24  | 15   | 11  | 8   | 8  | 5  | 2  | 12  | 9   |
| 1226 | 22   | 4   | 7   | 10   | 5   | 6   | 6  | 3  | 2  | 12  | 5   |
| 1230 | 9    | 4   | 4   | 9    | 5   | 1   | 4  | 2  | 9  | 4   | 3   |
| 1231 | 4    | 2   | 5   | 2    | 1   | 0   | 2  | 1  | 0  | 1   | 0   |
| 1232 | 21   | 6   | 3   | 51   | 20  | 36  | 5  | 1  | 2  | 6   | 5   |
| 1233 | 106  | 37  | 6   | 10   | 2   | 6   | 5  | 2  | 6  | 14  | 13  |
| 1234 | 16   | 2   | 2   | 8    | 3   | 4   | 7  | 3  | 2  | 11  | 5   |
| 1238 | 14   | 7   | 2   | 12   | 9   | 4   | 6  | 1  | 3  | 3   | 2   |
| 1239 | 19   | 5   | 10  | 12   | 6   | 8   | 10 | 4  | 4  | 5   | 3   |
| 1240 | 16   | 5   | 4   | 7    | 2   | 1   | 8  | 2  | 3  | 13  | 5   |
| 1241 | 10   | 8   | 5   | 3    | 1   | 1   | 5  | 0  | 3  | 3   | 2   |
| 1401 | 3    | 1   | 1   | 1    | 0   | 1   | 2  | 1  | 1  | 1   | 0   |
| 1402 | 13   | 5   | 3   | 11   | 5   | 5   | 6  | 1  | 3  | 7   | 6   |
| 1403 | 32   | 14  | 112 | 18   | 8   | 156 | 12 | 11 | 0  | 11  | 9   |
| 1404 | 18   | 6   | 6   | 10   | 3   | 6   | 5  | 1  | 1  | 11  | 8   |
| 1405 | 9    | 2   | 1   | 6    | 2   | 1   | 7  | 4  | 2  | 4   | 3   |
| 1406 | 3    | 2   | 10  | 1    | 0   | 0   | 1  | 0  | 1  | 2   | 1   |
| 1407 | 14   | 6   | 4   | 17   | 7   | 4   | 6  | 3  | 0  | 5   | 3   |
| 1408 | 33   | 15  | 6   | 35   | 8   | 9   | 7  | 4  | 2  | 14  | 5   |
| 1409 | 29   | 10  | 8   | 12   | 4   | 5   | 6  | 1  | 1  | 11  | 8   |
| 1410 | 14   | 5   | 7   | 5    | 2   | 4   | 5  | 2  | 2  | 3   | 2   |
| 1412 | 18   | 7   | 5   | 5    | 2   | 3   | 2  | 1  | 2  | 1   | 0   |
| 1413 | 19   | 3   | 1   | 36   | 7   | 5   | 6  | 3  | 4  | 3   | 1   |
| 1416 | 122  | 63  | 24  | 324  | 56  | 20  | 7  | 1  | 2  | 28  | 20  |
| 1418 | 70   | 37  | 25  | 29   | 17  | 27  | 8  | 1  | 0  | 19  | 9   |

|      |       |      |      |       |       |      |       |      |      |    |    |
|------|-------|------|------|-------|-------|------|-------|------|------|----|----|
| 1501 | 11    | 4    | 11   | 6     | 2     | 2    | 7     | 2    | 16   | 3  | 2  |
| 1601 | 20    | 15   | 10   | 1     | 0     | 1    | 2     | 1    | 0    | 2  | 1  |
| 1602 | 117   | 37   | 27   | 81    | 36    | 8    | 7     | 3    | 2    | 2  | 1  |
| 1603 | 31    | 5    | 53   | 16    | 9     | 67   | 15    | 8    | 2    | 14 | 13 |
| 1605 | 16    | 8    | 8    | 3     | 1     | 4    | 2     | 1    | 2    | 2  | 1  |
| 1606 | 36    | 21   | 22   | 2     | 1     | 1    | 3     | 2    | 0    | 1  | 0  |
| 1607 | 27    | 10   | 22   | 34    | 15    | 18   | 5     | 3    | 0    | 6  | 5  |
| 1608 | 39    | 21   | 25   | 53    | 33    | 7    | 10    | 7    | 6    | 15 | 11 |
| 1609 | 129   | 45   | 961  | 115   | 71    | 2273 | 12    | 8    | 4    | 47 | 24 |
| 1610 | 61536 | 4776 | 2972 | 49251 | 14108 | 7835 | 10575 | 2662 | 1307 | 71 | 56 |
| 1611 | 21    | 12   | 17   | 1     | 0     | 1    | 2     | 1    | 1    | 1  | 0  |
| 1613 | 138   | 27   | 19   | 106   | 24    | 3    | 14    | 11   | 6    | 16 | 14 |
| 1614 | 70    | 14   | 22   | 36    | 13    | 30   | 11    | 4    | 2    | 18 | 11 |
| 1615 | 62    | 22   | 8    | 20    | 11    | 17   | 5     | 0    | 2    | 4  | 3  |
| 1616 | 6     | 4    | 7    | 1     | 0     | 0    | 2     | 0    | 1    | 1  | 0  |
| 1617 | 20    | 8    | 5    | 19    | 12    | 5    | 9     | 2    | 1    | 5  | 4  |
| 1618 | 22    | 5    | 1    | 19    | 11    | 6    | 9     | 5    | 3    | 14 | 11 |
| 1701 | 18    | 3    | 9    | 10    | 5     | 4    | 6     | 1    | 4    | 10 | 5  |
| 1702 | 11    | 7    | 4    | 4     | 2     | 5    | 4     | 0    | 6    | 2  | 1  |
| 1703 | 1     | 0    | 2    | 1     | 0     | 0    | 1     | 0    | 2    | 1  | 0  |
| 1705 | 43    | 8    | 5    | 50    | 4     | 17   | 8     | 1    | 4    | 5  | 4  |
| 1706 | 24    | 9    | 3    | 17    | 5     | 2    | 9     | 6    | 1    | 3  | 1  |
| 1707 | 15    | 4    | 5    | 8     | 3     | 4    | 7     | 2    | 0    | 14 | 8  |
| 1801 | 13    | 5    | 1    | 6     | 4     | 7    | 7     | 2    | 4    | 3  | 2  |
| 1802 | 3     | 1    | 11   | 1     | 0     | 1    | 2     | 1    | 0    | 1  | 0  |
| 1804 | 16    | 6    | 3    | 99    | 8     | 11   | 9     | 5    | 0    | 2  | 1  |
| 1806 | 29    | 8    | 12   | 12    | 1     | 1    | 7     | 3    | 8    | 17 | 6  |
| 1807 | 24    | 12   | 8    | 58    | 15    | 31   | 8     | 4    | 4    | 14 | 5  |
| 1808 | 19    | 10   | 8    | 5     | 2     | 11   | 7     | 1    | 1    | 5  | 4  |
| 1809 | 3     | 1    | 4    | 1     | 0     | 0    | 2     | 1    | 0    | 1  | 0  |
| 1810 | 28    | 6    | 4    | 31    | 7     | 4    | 9     | 3    | 7    | 6  | 5  |
| 2001 | 18    | 4    | 6    | 15    | 5     | 4    | 8     | 2    | 4    | 13 | 8  |
| 2002 | 17    | 6    | 7    | 12    | 8     | 35   | 6     | 1    | 3    | 11 | 5  |
| 2003 | 16    | 7    | 5    | 4     | 1     | 1    | 5     | 2    | 4    | 4  | 3  |
| 2004 | 3     | 1    | 2    | 2     | 1     | 0    | 2     | 0    | 2    | 1  | 0  |
| 2005 | 10    | 8    | 6    | 11    | 7     | 5    | 5     | 2    | 2    | 4  | 3  |
| 2006 | 35    | 3    | 5    | 21    | 14    | 364  | 7     | 4    | 3    | 17 | 13 |
| 2007 | 30    | 28   | 2    | 11    | 4     | 149  | 6     | 2    | 2    | 10 | 3  |
| 2008 | 13    | 5    | 2    | 5     | 2     | 27   | 2     | 1    | 1    | 1  | 0  |
| 2009 | 6     | 4    | 16   | 1     | 0     | 0    | 2     | 1    | 1    | 1  | 0  |
| 2010 | 15    | 14   | 2    | 16    | 12    | 2    | 5     | 3    | 2    | 2  | 1  |
| 2011 | 21    | 10   | 10   | 13    | 7     | 3    | 8     | 5    | 3    | 13 | 11 |
| 2012 | 24    | 6    | 7    | 6     | 3     | 2    | 6     | 4    | 3    | 13 | 6  |
| 2013 | 18    | 6    | 7    | 5     | 1     | 9    | 3     | 1    | 3    | 1  | 0  |
| 2101 | 5     | 3    | 6    | 4     | 2     | 3    | 2     | 1    | 0    | 1  | 0  |
| 2102 | 18    | 12   | 8    | 26    | 17    | 7    | 7     | 2    | 3    | 3  | 2  |
| 2103 | 25    | 10   | 20   | 16    | 3     | 4    | 10    | 4    | 4    | 8  | 6  |
| 2104 | 27    | 3    | 8    | 8     | 1     | 2    | 5     | 2    | 4    | 12 | 4  |
| 2105 | 446   | 74   | 976  | 213   | 140   | 1328 | 8     | 6    | 4    | 21 | 20 |
| 2106 | 4     | 3    | 3    | 1     | 0     | 0    | 2     | 1    | 1    | 1  | 0  |

|      |    |    |    |    |    |      |   |   |   |    |    |
|------|----|----|----|----|----|------|---|---|---|----|----|
| 2107 | 22 | 13 | 3  | 20 | 12 | 12   | 8 | 2 | 2 | 7  | 6  |
| 2201 | 27 | 1  | 5  | 17 | 3  | 3    | 8 | 4 | 2 | 9  | 6  |
| 2202 | 20 | 3  | 8  | 8  | 2  | 7    | 5 | 1 | 2 | 8  | 3  |
| 2203 | 12 | 1  | 2  | 5  | 3  | 1    | 3 | 1 | 1 | 3  | 2  |
| 2204 | 3  | 2  | 9  | 2  | 1  | 0    | 2 | 1 | 0 | 1  | 0  |
| 2205 | 54 | 19 | 33 | 51 | 15 | 13   | 7 | 3 | 9 | 6  | 5  |
| 2206 | 27 | 6  | 14 | 20 | 6  | 10   | 9 | 5 | 6 | 11 | 5  |
| 2207 | 22 | 4  | 4  | 14 | 4  | 9    | 6 | 2 | 1 | 11 | 9  |
| 2208 | 12 | 5  | 6  | 3  | 0  | 1    | 5 | 2 | 5 | 3  | 1  |
| 2209 | 3  | 2  | 3  | 1  | 0  | 0    | 1 | 0 | 1 | 1  | 0  |
| 2210 | 15 | 1  | 3  | 16 | 4  | 8    | 7 | 3 | 2 | 1  | 0  |
| 2211 | 22 | 2  | 7  | 13 | 2  | 1    | 9 | 4 | 2 | 16 | 7  |
| 2212 | 24 | 6  | 5  | 9  | 3  | 8    | 5 | 1 | 1 | 9  | 6  |
| 3001 | 63 | 13 | 6  | 35 | 3  | 7    | 8 | 4 | 6 | 7  | 5  |
| 3301 | 20 | 5  | 6  | 16 | 5  | 10   | 9 | 4 | 5 | 13 | 10 |
| 3302 | 31 | 10 | 4  | 14 | 5  | 7    | 5 | 2 | 1 | 9  | 5  |
| 3401 | 12 | 1  | 1  | 9  | 2  | 1    | 5 | 3 | 2 | 5  | 3  |
| 9001 | 5  | 3  | 4  | 1  | 0  | 1    | 2 | 0 | 1 | 1  | 0  |
| 9002 | 34 | 32 | 9  | 32 | 17 | 588  | 5 | 3 | 2 | 1  | 0  |
| 9003 | 15 | 12 | 14 | 9  | 3  | 1001 | 5 | 3 | 3 | 7  | 3  |

Supplementary Table 3.5 represents all fluorescent signals (0-65535 RFU, relative fluorescent units) for groups of mice contacted to *Lactobacillus reuteri* strain SD2112 (ATCC 55730)

| Mouse ID | 5.1    |        |        | 5.2    |        |        | 5.3    |        |        | 5.4    |        |
|----------|--------|--------|--------|--------|--------|--------|--------|--------|--------|--------|--------|
| Nr       | Median | -1st Q | +3rd Q | Median | -1st Q | +3rd Q | Median | -1st Q | +3rd Q | Median | -1st Q |
| 001      | 44     | 11     | 1208   | 52     | 13     | 19     | 39     | 22     | 204    | 18     | 6      |
| 002      | 168    | 43     | 2362   | 172    | 62     | 41     | 92     | 50     | 42     | 92     | 21     |
| 003      | 138    | 32     | 40     | 88     | 19     | 110    | 111    | 23     | 90     | 65     | 23     |
| 004      | 58     | 15     | 1707   | 36     | 4      | 8      | 176    | 59     | 46     | 56     | 15     |
| 005      | 11     | 5      | 8      | 4      | 1      | 2      | 7      | 2      | 1      | 14     | 7      |
| 006      | 39     | 17     | 3      | 65     | 23     | 19     | 16     | 7      | 15     | 18     | 1      |
| 007      | 32     | 20     | 20     | 64     | 40     | 50     | 27     | 6      | 14     | 23     | 7      |
| 009      | 40     | 12     | 26     | 54     | 18     | 10     | 74     | 16     | 12     | 36     | 14     |
| 010      | 8      | 3      | 5      | 6      | 1      | 1      | 9      | 2      | 2      | 10     | 7      |
| 011      | 29     | 13     | 16     | 27     | 9      | 24     | 16     | 8      | 3      | 41     | 6      |
| 012      | 36     | 12     | 31     | 40     | 8      | 13     | 31     | 17     | 19     | 25     | 6      |
| 013      | 66     | 37     | 49     | 20     | 5      | 20     | 39     | 20     | 22     | 80     | 37     |
| 014      | 21     | 3      | 3      | 20     | 9      | 7      | 50     | 9      | 18     | 13     | 1      |
| 015      | 4      | 2      | 0      | 3      | 2      | 3      | 4      | 2      | 3      | 4      | 2      |
| 016      | 28     | 15     | 16     | 36     | 11     | 14     | 18     | 2      | 2      | 20     | 4      |
| 017      | 26     | 5      | 27     | 30     | 18     | 45     | 20     | 5      | 12     | 16     | 5      |
| 018      | 33     | 4      | 42     | 29     | 8      | 3      | 37     | 6      | 4      | 27     | 11     |
| 019      | 28     | 3      | 11     | 20     | 4      | 15     | 27     | 8      | 18     | 14     | 2      |
| 020      | 23     | 9      | 4      | 20     | 12     | 40     | 3343   | 1086   | 354    | 7      | 2      |
| 021      | 12     | 3      | 7      | 30     | 8      | 10     | 13     | 5      | 7      | 14     | 2      |
| 022      | 25     | 12     | 36     | 29     | 16     | 27     | 16     | 7      | 3      | 17     | 6      |
| 023      | 31     | 10     | 90     | 25     | 3      | 1      | 31     | 8      | 57     | 24     | 7      |
| 024      | 76     | 34     | 23     | 47     | 22     | 19     | 23     | 2      | 4      | 13     | 4      |
| 025      | 5      | 3      | 6      | 6      | 5      | 7      | 10     | 6      | 2      | 5      | 1      |
| 026      | 11     | 3      | 9      | 18     | 4      | 9      | 15     | 5      | 5      | 18     | 6      |
| 027      | 31     | 19     | 30     | 21     | 7      | 30     | 22     | 8      | 13     | 12     | 4      |



|     |     |    |      |     |    |     |    |    |    |     |    |
|-----|-----|----|------|-----|----|-----|----|----|----|-----|----|
| 037 | 50  | 15 | 95   | 34  | 12 | 15  | 51 | 11 | 2  | 27  | 8  |
| 038 | 70  | 21 | 13   | 36  | 11 | 23  | 94 | 40 | 51 | 153 | 90 |
| 043 | 4   | 1  | 0    | 65  | 28 | 34  | 30 | 14 | 20 | 18  | 1  |
| 044 | 15  | 8  | 6    | 27  | 12 | 21  | 17 | 8  | 7  | 18  | 7  |
| 045 | 27  | 4  | 51   | 31  | 11 | 77  | 73 | 37 | 38 | 41  | 21 |
| 046 | 2   | 0  | 10   | 14  | 3  | 13  | 32 | 9  | 8  | 16  | 6  |
| 047 | 13  | 5  | 5    | 29  | 5  | 4   | 24 | 8  | 10 | 32  | 20 |
| 048 | 10  | 5  | 18   | 20  | 7  | 26  | 30 | 9  | 23 | 15  | 5  |
| 049 | 29  | 13 | 1032 | 22  | 3  | 5   | 20 | 6  | 2  | 21  | 6  |
| 050 | 116 | 80 | 1030 | 64  | 27 | 114 | 29 | 10 | 18 | 24  | 8  |
| 051 | 19  | 3  | 803  | 16  | 6  | 11  | 17 | 4  | 9  | 8   | 1  |
| 052 | 7   | 6  | 1    | 8   | 6  | 6   | 6  | 2  | 3  | 7   | 2  |
| 053 | 8   | 4  | 1    | 28  | 16 | 6   | 20 | 10 | 3  | 11  | 1  |
| 054 | 26  | 6  | 8    | 27  | 5  | 5   | 18 | 1  | 3  | 14  | 3  |
| 055 | 41  | 7  | 42   | 112 | 48 | 12  | 25 | 14 | 29 | 21  | 3  |
| 071 | 50  | 11 | 7    | 33  | 14 | 19  | 29 | 7  | 7  | 13  | 5  |
| 072 | 5   | 1  | 55   | 8   | 4  | 3   | 12 | 3  | 3  | 9   | 3  |
| 073 | 9   | 4  | 6    | 20  | 7  | 11  | 13 | 4  | 12 | 15  | 3  |
| 074 | 25  | 5  | 10   | 27  | 12 | 23  | 14 | 4  | 2  | 18  | 5  |
| 075 | 88  | 35 | 38   | 25  | 5  | 7   | 27 | 4  | 20 | 17  | 2  |
| 076 | 26  | 9  | 20   | 26  | 8  | 6   | 23 | 2  | 3  | 11  | 4  |
| 077 | 11  | 5  | 3    | 10  | 2  | 1   | 13 | 5  | 4  | 7   | 3  |
| 078 | 8   | 3  | 12   | 23  | 13 | 15  | 15 | 8  | 17 | 17  | 5  |
| 080 | 82  | 27 | 56   | 70  | 22 | 32  | 23 | 9  | 6  | 20  | 6  |
| 081 | 42  | 19 | 15   | 21  | 5  | 15  | 25 | 8  | 6  | 11  | 5  |
| 082 | 3   | 2  | 5    | 2   | 1  | 4   | 9  | 2  | 5  | 11  | 5  |
| 083 | 6   | 1  | 3    | 16  | 7  | 7   | 17 | 8  | 14 | 14  | 1  |
| 084 | 83  | 20 | 39   | 40  | 17 | 8   | 19 | 3  | 6  | 19  | 2  |
| 085 | 65  | 35 | 20   | 81  | 40 | 22  | 55 | 20 | 69 | 18  | 5  |
| 086 | 60  | 6  | 20   | 33  | 15 | 25  | 51 | 17 | 76 | 12  | 2  |
| 087 | 4   | 2  | 4    | 4   | 2  | 5   | 12 | 5  | 3  | 4   | 1  |
| 088 | 37  | 12 | 13   | 78  | 34 | 26  | 11 | 2  | 18 | 23  | 14 |
| 089 | 56  | 5  | 18   | 36  | 5  | 14  | 18 | 4  | 4  | 11  | 2  |
| 092 | 45  | 4  | 624  | 28  | 9  | 1   | 36 | 8  | 65 | 10  | 5  |
| 093 | 4   | 1  | 2    | 6   | 4  | 3   | 7  | 3  | 0  | 7   | 4  |
| 094 | 6   | 2  | 6    | 12  | 3  | 5   | 12 | 2  | 4  | 11  | 2  |
| 096 | 95  | 18 | 37   | 63  | 16 | 14  | 31 | 8  | 54 | 23  | 12 |
| 097 | 72  | 16 | 27   | 46  | 19 | 54  | 22 | 4  | 12 | 15  | 3  |
| 098 | 5   | 1  | 110  | 4   | 3  | 2   | 9  | 2  | 1  | 10  | 3  |
| 099 | 7   | 3  | 2    | 17  | 7  | 80  | 15 | 3  | 4  | 11  | 6  |
| 100 | 20  | 3  | 8    | 29  | 13 | 16  | 13 | 5  | 4  | 11  | 2  |
| 101 | 75  | 21 | 510  | 51  | 13 | 23  | 54 | 13 | 57 | 21  | 9  |
| 102 | 61  | 13 | 313  | 67  | 23 | 6   | 62 | 12 | 13 | 11  | 3  |
| 103 | 5   | 3  | 3    | 4   | 2  | 4   | 10 | 2  | 2  | 11  | 4  |
| 104 | 33  | 21 | 12   | 41  | 16 | 6   | 16 | 7  | 10 | 22  | 3  |
| 105 | 48  | 23 | 25   | 70  | 21 | 26  | 21 | 5  | 2  | 20  | 7  |
| 106 | 52  | 19 | 11   | 35  | 15 | 12  | 22 | 10 | 8  | 14  | 2  |
| 107 | 70  | 23 | 25   | 68  | 32 | 13  | 23 | 4  | 4  | 10  | 5  |
| 110 | 4   | 2  | 4    | 33  | 14 | 20  | 22 | 11 | 12 | 21  | 4  |
| 111 | 29  | 21 | 12   | 26  | 12 | 10  | 17 | 5  | 11 | 614 | 90 |

|     |     |    |     |     |     |     |     |    |     |     |    |
|-----|-----|----|-----|-----|-----|-----|-----|----|-----|-----|----|
| 112 | 30  | 10 | 24  | 24  | 13  | 4   | 27  | 4  | 19  | 14  | 1  |
| 113 | 53  | 9  | 10  | 51  | 19  | 43  | 22  | 4  | 10  | 9   | 1  |
| 114 | 3   | 1  | 2   | 3   | 2   | 2   | 5   | 2  | 3   | 7   | 1  |
| 115 | 7   | 4  | 4   | 13  | 3   | 6   | 12  | 7  | 11  | 15  | 7  |
| 116 | 7   | 2  | 1   | 18  | 7   | 5   | 33  | 3  | 5   | 14  | 3  |
| 117 | 20  | 4  | 2   | 17  | 6   | 4   | 17  | 3  | 3   | 24  | 10 |
| 118 | 49  | 18 | 31  | 21  | 5   | 21  | 14  | 2  | 2   | 41  | 26 |
| 119 | 4   | 2  | 1   | 5   | 2   | 2   | 5   | 2  | 3   | 9   | 3  |
| 120 | 7   | 4  | 1   | 13  | 3   | 12  | 12  | 5  | 9   | 14  | 3  |
| 121 | 12  | 4  | 2   | 17  | 5   | 12  | 13  | 3  | 2   | 13  | 3  |
| 122 | 17  | 7  | 20  | 18  | 7   | 15  | 22  | 5  | 8   | 10  | 3  |
| 123 | 16  | 6  | 3   | 12  | 2   | 8   | 20  | 8  | 3   | 8   | 2  |
| 125 | 97  | 62 | 81  | 140 | 45  | 7   | 123 | 23 | 117 | 52  | 16 |
| 126 | 27  | 9  | 27  | 46  | 6   | 4   | 28  | 10 | 3   | 17  | 2  |
| 127 | 53  | 15 | 59  | 59  | 24  | 7   | 60  | 12 | 61  | 39  | 5  |
| 128 | 62  | 7  | 10  | 100 | 23  | 25  | 68  | 11 | 10  | 53  | 14 |
| 129 | 43  | 37 | 14  | 11  | 5   | 12  | 8   | 2  | 9   | 15  | 4  |
| 130 | 21  | 10 | 77  | 24  | 11  | 3   | 19  | 6  | 13  | 17  | 4  |
| 131 | 244 | 82 | 366 | 105 | 26  | 20  | 28  | 4  | 17  | 48  | 11 |
| 132 | 27  | 9  | 34  | 30  | 12  | 17  | 23  | 8  | 14  | 14  | 7  |
| 133 | 29  | 6  | 11  | 30  | 6   | 5   | 43  | 5  | 10  | 33  | 5  |
| 134 | 6   | 4  | 0   | 10  | 8   | 10  | 16  | 2  | 5   | 20  | 8  |
| 135 | 5   | 1  | 2   | 17  | 7   | 7   | 19  | 10 | 10  | 16  | 6  |
| 136 | 38  | 9  | 182 | 49  | 13  | 7   | 40  | 7  | 17  | 49  | 12 |
| 137 | 89  | 35 | 233 | 50  | 10  | 17  | 84  | 23 | 10  | 58  | 9  |
| 138 | 43  | 15 | 119 | 38  | 6   | 9   | 47  | 8  | 10  | 37  | 9  |
| 139 | 6   | 3  | 6   | 4   | 2   | 9   | 11  | 5  | 5   | 9   | 4  |
| 140 | 85  | 62 | 19  | 126 | 71  | 58  | 91  | 40 | 31  | 134 | 74 |
| 142 | 66  | 29 | 21  | 43  | 13  | 14  | 22  | 3  | 30  | 20  | 3  |
| 143 | 26  | 6  | 6   | 35  | 7   | 10  | 21  | 2  | 5   | 8   | 0  |
| 144 | 5   | 1  | 5   | 5   | 3   | 4   | 13  | 4  | 4   | 13  | 3  |
| 145 | 20  | 11 | 4   | 44  | 22  | 14  | 13  | 4  | 7   | 22  | 13 |
| 146 | 131 | 30 | 68  | 57  | 17  | 13  | 32  | 12 | 9   | 20  | 6  |
| 149 | 8   | 5  | 4   | 5   | 1   | 2   | 12  | 2  | 3   | 8   | 1  |
| 150 | 61  | 27 | 12  | 201 | 185 | 13  | 32  | 8  | 28  | 39  | 17 |
| 151 | 33  | 9  | 3   | 26  | 7   | 11  | 18  | 1  | 3   | 15  | 5  |
| 152 | 37  | 10 | 18  | 38  | 11  | 14  | 24  | 8  | 39  | 15  | 0  |
| 153 | 41  | 16 | 11  | 37  | 8   | 11  | 27  | 7  | 7   | 13  | 4  |
| 154 | 9   | 2  | 3   | 9   | 3   | 11  | 16  | 4  | 28  | 49  | 34 |
| 156 | 41  | 10 | 18  | 16  | 2   | 18  | 30  | 11 | 8   | 393 | 51 |
| 158 | 90  | 19 | 157 | 134 | 34  | 17  | 25  | 7  | 14  | 11  | 3  |
| 159 | 5   | 2  | 4   | 10  | 4   | 9   | 14  | 6  | 4   | 15  | 8  |
| 160 | 21  | 10 | 8   | 25  | 9   | 10  | 18  | 8  | 6   | 15  | 7  |
| 161 | 25  | 4  | 5   | 28  | 7   | 13  | 16  | 2  | 8   | 13  | 5  |
| 162 | 109 | 19 | 47  | 52  | 19  | 8   | 55  | 9  | 7   | 13  | 2  |
| 164 | 6   | 1  | 3   | 7   | 5   | 2   | 12  | 3  | 10  | 13  | 5  |
| 165 | 8   | 1  | 8   | 23  | 4   | 8   | 13  | 1  | 12  | 15  | 5  |
| 166 | 194 | 95 | 151 | 538 | 79  | 189 | 101 | 23 | 56  | 14  | 4  |
| 167 | 32  | 17 | 35  | 26  | 4   | 13  | 25  | 10 | 13  | 15  | 6  |
| 168 | 40  | 9  | 4   | 45  | 7   | 26  | 39  | 11 | 10  | 22  | 6  |

|     |     |    |     |      |     |     |      |     |     |       |      |
|-----|-----|----|-----|------|-----|-----|------|-----|-----|-------|------|
| 169 | 15  | 11 | 26  | 6    | 4   | 13  | 14   | 8   | 11  | 21    | 9    |
| 170 | 19  | 7  | 8   | 36   | 7   | 9   | 31   | 17  | 6   | 19    | 3    |
| 171 | 15  | 1  | 94  | 24   | 13  | 4   | 17   | 6   | 2   | 10    | 3    |
| 173 | 148 | 57 | 31  | 31   | 5   | 23  | 33   | 11  | 32  | 15    | 4    |
| 174 | 77  | 16 | 24  | 45   | 15  | 27  | 24   | 3   | 5   | 10    | 3    |
| 175 | 7   | 4  | 5   | 8    | 6   | 6   | 13   | 6   | 4   | 12    | 4    |
| 176 | 63  | 22 | 43  | 172  | 7   | 7   | 91   | 11  | 46  | 209   | 46   |
| 177 | 370 | 43 | 212 | 425  | 24  | 69  | 186  | 33  | 58  | 900   | 138  |
| 178 | 266 | 61 | 48  | 54   | 13  | 6   | 42   | 12  | 23  | 44    | 27   |
| 179 | 41  | 8  | 13  | 209  | 20  | 22  | 36   | 7   | 27  | 30    | 15   |
| 180 | 7   | 4  | 12  | 81   | 78  | 253 | 15   | 8   | 8   | 20    | 9    |
| 181 | 491 | 60 | 438 | 2659 | 763 | 709 | 1578 | 462 | 421 | 10965 | 4092 |
| 182 | 19  | 3  | 5   | 27   | 3   | 6   | 31   | 10  | 7   | 64    | 22   |
| 183 | 68  | 20 | 26  | 90   | 23  | 18  | 85   | 49  | 30  | 61    | 28   |
| 184 | 52  | 31 | 9   | 61   | 14  | 41  | 41   | 17  | 13  | 39    | 19   |
| 186 | 10  | 2  | 9   | 25   | 6   | 5   | 22   | 10  | 8   | 20    | 6    |
| 187 | 12  | 2  | 8   | 19   | 3   | 6   | 21   | 3   | 4   | 11    | 3    |
| 188 | 14  | 2  | 3   | 24   | 7   | 9   | 20   | 7   | 16  | 8     | 1    |
| 189 | 53  | 22 | 19  | 69   | 37  | 65  | 42   | 9   | 17  | 49    | 34   |
| 190 | 8   | 4  | 0   | 4    | 0   | 2   | 15   | 7   | 6   | 14    | 6    |
| 191 | 21  | 10 | 5   | 26   | 11  | 4   | 21   | 12  | 11  | 21    | 11   |
| 192 | 41  | 11 | 14  | 33   | 10  | 13  | 38   | 14  | 3   | 17    | 1    |
| 193 | 106 | 13 | 16  | 31   | 5   | 20  | 72   | 18  | 39  | 221   | 37   |
| 194 | 72  | 25 | 58  | 26   | 7   | 19  | 42   | 18  | 12  | 15    | 5    |
| 195 | 7   | 3  | 1   | 5    | 1   | 2   | 14   | 8   | 6   | 13    | 5    |
| 196 | 12  | 4  | 5   | 18   | 2   | 11  | 24   | 13  | 19  | 42    | 13   |
| 197 | 24  | 9  | 6   | 22   | 6   | 4   | 22   | 4   | 6   | 13    | 1    |
| 198 | 36  | 11 | 22  | 51   | 12  | 11  | 53   | 16  | 11  | 44    | 13   |
| 199 | 19  | 6  | 16  | 23   | 7   | 7   | 27   | 5   | 8   | 10    | 2    |
| 200 | 9   | 4  | 2   | 7    | 3   | 2   | 9    | 3   | 2   | 13    | 4    |
| 201 | 64  | 30 | 33  | 35   | 12  | 6   | 42   | 20  | 7   | 709   | 100  |
| 202 | 71  | 18 | 70  | 23   | 5   | 10  | 28   | 8   | 4   | 19    | 4    |
| 203 | 155 | 42 | 35  | 1114 | 68  | 119 | 25   | 6   | 36  | 21    | 9    |
| 204 | 28  | 6  | 10  | 31   | 5   | 11  | 17   | 2   | 1   | 13    | 5    |
| 205 | 7   | 3  | 5   | 6    | 2   | 5   | 14   | 5   | 3   | 13    | 6    |
| 206 | 15  | 7  | 14  | 22   | 4   | 13  | 27   | 8   | 13  | 22    | 8    |
| 207 | 54  | 19 | 24  | 25   | 8   | 16  | 16   | 3   | 3   | 19    | 7    |
| 215 | 78  | 16 | 43  | 74   | 34  | 13  | 29   | 5   | 58  | 18    | 3    |
| 216 | 148 | 27 | 9   | 224  | 41  | 12  | 363  | 64  | 56  | 304   | 206  |
| 217 | 27  | 18 | 21  | 27   | 23  | 44  | 23   | 5   | 4   | 41    | 23   |
| 219 | 11  | 2  | 7   | 27   | 9   | 3   | 20   | 7   | 12  | 24    | 10   |
| 220 | 43  | 9  | 21  | 55   | 28  | 318 | 23   | 5   | 6   | 16    | 1    |
| 221 | 37  | 10 | 19  | 29   | 8   | 15  | 36   | 6   | 5   | 25    | 2    |
| 222 | 101 | 9  | 8   | 71   | 8   | 16  | 31   | 8   | 8   | 12    | 3    |
| 223 | 8   | 5  | 2   | 4    | 2   | 4   | 8    | 2   | 6   | 12    | 2    |
| 225 | 65  | 11 | 6   | 42   | 30  | 18  | 28   | 5   | 5   | 16    | 3    |
| 226 | 44  | 21 | 25  | 30   | 9   | 11  | 31   | 10  | 30  | 14    | 4    |
| 227 | 57  | 9  | 28  | 54   | 16  | 25  | 44   | 7   | 10  | 12    | 4    |
| 228 | 14  | 9  | 16  | 6    | 2   | 0   | 23   | 3   | 1   | 40    | 27   |
| 229 | 4   | 0  | 3   | 14   | 4   | 7   | 11   | 3   | 7   | 13    | 2    |

|     |     |    |    |     |    |    |     |    |     |      |     |
|-----|-----|----|----|-----|----|----|-----|----|-----|------|-----|
| 231 | 37  | 25 | 6  | 28  | 11 | 15 | 16  | 5  | 2   | 14   | 3   |
| 232 | 77  | 20 | 10 | 48  | 14 | 11 | 25  | 6  | 13  | 13   | 3   |
| 233 | 115 | 8  | 12 | 99  | 19 | 25 | 26  | 2  | 8   | 16   | 5   |
| 234 | 35  | 30 | 54 | 31  | 20 | 38 | 58  | 30 | 18  | 25   | 11  |
| 235 | 32  | 10 | 26 | 65  | 14 | 12 | 44  | 15 | 7   | 14   | 4   |
| 236 | 18  | 8  | 7  | 37  | 21 | 18 | 52  | 11 | 6   | 10   | 1   |
| 237 | 32  | 5  | 27 | 40  | 13 | 7  | 42  | 11 | 23  | 18   | 9   |
| 239 | 23  | 15 | 2  | 16  | 12 | 11 | 16  | 8  | 5   | 13   | 3   |
| 240 | 12  | 6  | 9  | 18  | 7  | 2  | 14  | 6  | 15  | 14   | 5   |
| 241 | 15  | 3  | 7  | 20  | 7  | 8  | 19  | 6  | 10  | 13   | 2   |
| 242 | 43  | 20 | 9  | 31  | 10 | 25 | 28  | 7  | 11  | 11   | 3   |
| 243 | 28  | 5  | 21 | 37  | 7  | 21 | 22  | 5  | 11  | 7    | 1   |
| 245 | 16  | 5  | 16 | 16  | 12 | 28 | 27  | 10 | 4   | 10   | 3   |
| 246 | 36  | 8  | 8  | 34  | 9  | 11 | 19  | 7  | 12  | 19   | 4   |
| 247 | 13  | 5  | 6  | 16  | 6  | 10 | 20  | 5  | 3   | 14   | 3   |
| 248 | 69  | 20 | 24 | 58  | 20 | 20 | 25  | 6  | 54  | 11   | 2   |
| 249 | 28  | 10 | 9  | 43  | 9  | 24 | 22  | 5  | 15  | 10   | 3   |
| 250 | 6   | 2  | 1  | 11  | 6  | 9  | 15  | 8  | 3   | 12   | 4   |
| 251 | 44  | 20 | 16 | 55  | 30 | 29 | 42  | 8  | 33  | 24   | 7   |
| 252 | 17  | 9  | 6  | 10  | 1  | 6  | 13  | 1  | 0   | 15   | 3   |
| 253 | 259 | 48 | 37 | 56  | 19 | 28 | 145 | 25 | 51  | 20   | 2   |
| 254 | 76  | 26 | 24 | 59  | 34 | 20 | 21  | 7  | 3   | 27   | 17  |
| 255 | 14  | 9  | 18 | 17  | 14 | 2  | 12  | 1  | 2   | 28   | 17  |
| 256 | 24  | 13 | 9  | 55  | 24 | 25 | 29  | 11 | 10  | 3213 | 550 |
| 258 | 10  | 3  | 6  | 17  | 8  | 8  | 17  | 1  | 3   | 13   | 3   |
| 259 | 88  | 13 | 33 | 53  | 10 | 20 | 25  | 5  | 11  | 25   | 12  |
| 260 | 200 | 16 | 27 | 212 | 35 | 32 | 293 | 60 | 174 | 16   | 2   |
| 261 | 22  | 16 | 9  | 19  | 15 | 16 | 21  | 9  | 4   | 12   | 2   |
| 262 | 5   | 0  | 3  | 14  | 3  | 4  | 18  | 10 | 3   | 20   | 10  |
| 263 | 22  | 10 | 5  | 15  | 2  | 18 | 24  | 5  | 3   | 152  | 47  |
| 264 | 115 | 32 | 26 | 488 | 77 | 32 | 267 | 45 | 113 | 27   | 5   |
| 266 | 29  | 20 | 20 | 27  | 22 | 5  | 18  | 9  | 1   | 14   | 5   |
| 267 | 55  | 20 | 15 | 74  | 41 | 39 | 59  | 13 | 20  | 92   | 61  |
| 268 | 39  | 23 | 13 | 41  | 19 | 12 | 24  | 7  | 4   | 17   | 1   |
| 287 | 101 | 11 | 24 | 72  | 25 | 30 | 87  | 38 | 27  | 29   | 11  |
| 288 | 25  | 3  | 17 | 27  | 7  | 11 | 17  | 1  | 4   | 9    | 3   |
| 289 | 11  | 6  | 10 | 6   | 3  | 7  | 17  | 4  | 7   | 13   | 3   |
| 290 | 16  | 9  | 7  | 21  | 7  | 10 | 13  | 4  | 10  | 13   | 3   |
| 291 | 28  | 14 | 5  | 27  | 12 | 17 | 24  | 6  | 7   | 13   | 4   |
| 292 | 28  | 7  | 17 | 42  | 12 | 6  | 37  | 12 | 27  | 16   | 6   |
| 293 | 36  | 7  | 3  | 32  | 9  | 7  | 19  | 4  | 5   | 8    | 2   |
| 294 | 5   | 2  | 0  | 7   | 3  | 3  | 14  | 3  | 14  | 19   | 10  |
| 295 | 29  | 17 | 26 | 35  | 14 | 9  | 23  | 4  | 5   | 17   | 3   |
| 296 | 22  | 9  | 11 | 16  | 3  | 15 | 25  | 5  | 4   | 14   | 3   |
| 297 | 51  | 21 | 8  | 37  | 8  | 18 | 22  | 6  | 47  | 18   | 6   |
| 298 | 34  | 3  | 16 | 32  | 6  | 17 | 19  | 6  | 12  | 11   | 5   |
| 299 | 12  | 6  | 12 | 10  | 5  | 2  | 13  | 4  | 8   | 15   | 7   |
| 300 | 46  | 12 | 11 | 37  | 4  | 14 | 13  | 3  | 5   | 23   | 10  |
| 302 | 78  | 25 | 3  | 59  | 8  | 10 | 51  | 20 | 30  | 13   | 3   |
| 303 | 47  | 22 | 43 | 57  | 42 | 15 | 33  | 4  | 14  | 18   | 7   |

|     |      |    |    |      |    |    |      |     |     |      |     |
|-----|------|----|----|------|----|----|------|-----|-----|------|-----|
| 304 | 6    | 2  | 9  | 6    | 4  | 7  | 12   | 6   | 17  | 13   | 3   |
| 305 | 23   | 9  | 5  | 25   | 9  | 12 | 21   | 4   | 10  | 14   | 4   |
| 306 | 17   | 5  | 4  | 20   | 8  | 7  | 10   | 1   | 5   | 12   | 2   |
| 307 | 31   | 7  | 21 | 20   | 3  | 10 | 25   | 10  | 18  | 19   | 6   |
| 308 | 70   | 14 | 14 | 57   | 15 | 26 | 33   | 10  | 15  | 16   | 2   |
| 309 | 6    | 2  | 6  | 6    | 2  | 1  | 14   | 5   | 7   | 12   | 3   |
| 310 | 14   | 4  | 10 | 28   | 7  | 3  | 13   | 5   | 8   | 17   | 6   |
| 315 | 83   | 8  | 18 | 79   | 16 | 7  | 57   | 20  | 10  | 30   | 10  |
| 318 | 34   | 11 | 14 | 142  | 11 | 1  | 33   | 8   | 11  | 48   | 20  |
| 319 | 30   | 17 | 13 | 30   | 10 | 14 | 33   | 11  | 23  | 25   | 14  |
| 320 | 120  | 11 | 21 | 70   | 23 | 9  | 85   | 18  | 34  | 49   | 12  |
| 321 | 33   | 9  | 6  | 33   | 6  | 5  | 22   | 4   | 6   | 10   | 4   |
| 322 | 6    | 3  | 3  | 6    | 3  | 2  | 16   | 7   | 5   | 15   | 3   |
| 323 | 26   | 8  | 4  | 47   | 10 | 5  | 20   | 5   | 7   | 15   | 2   |
| 324 | 47   | 26 | 14 | 64   | 22 | 23 | 29   | 4   | 10  | 25   | 7   |
| 325 | 37   | 4  | 2  | 47   | 17 | 8  | 55   | 8   | 39  | 48   | 6   |
| 326 | 40   | 3  | 3  | 43   | 6  | 10 | 53   | 5   | 8   | 36   | 7   |
| 327 | 8    | 5  | 5  | 8    | 3  | 2  | 15   | 2   | 2   | 22   | 7   |
| 328 | 22   | 13 | 12 | 41   | 3  | 4  | 47   | 14  | 4   | 45   | 5   |
| 329 | 56   | 7  | 4  | 124  | 36 | 13 | 68   | 6   | 7   | 65   | 4   |
| 330 | 31   | 5  | 9  | 44   | 9  | 2  | 75   | 19  | 11  | 51   | 16  |
| 331 | 66   | 18 | 5  | 50   | 13 | 18 | 25   | 4   | 5   | 12   | 2   |
| 332 | 4    | 1  | 2  | 8    | 5  | 2  | 14   | 4   | 1   | 21   | 12  |
| 333 | 25   | 7  | 11 | 47   | 19 | 7  | 23   | 9   | 5   | 24   | 5   |
| 334 | 31   | 8  | 10 | 28   | 9  | 9  | 26   | 6   | 3   | 16   | 3   |
| 335 | 101  | 11 | 11 | 67   | 9  | 14 | 33   | 15  | 21  | 48   | 22  |
| 359 | 60   | 18 | 24 | 25   | 9  | 11 | 31   | 4   | 10  | 10   | 1   |
| 360 | 18   | 13 | 19 | 8    | 2  | 3  | 18   | 5   | 2   | 14   | 5   |
| 361 | 138  | 42 | 90 | 91   | 35 | 31 | 29   | 6   | 10  | 29   | 3   |
| 362 | 54   | 10 | 7  | 439  | 63 | 11 | 455  | 8   | 17  | 1196 | 81  |
| 363 | 57   | 17 | 20 | 62   | 26 | 17 | 73   | 25  | 51  | 51   | 18  |
| 364 | 1336 | 32 | 54 | 1408 | 47 | 44 | 1107 | 125 | 123 | 1140 | 131 |
| 365 | 16   | 6  | 12 | 40   | 30 | 54 | 15   | 3   | 11  | 24   | 10  |
| 366 | 16   | 5  | 6  | 29   | 8  | 5  | 27   | 8   | 10  | 25   | 12  |
| 368 | 60   | 26 | 37 | 60   | 27 | 15 | 69   | 16  | 15  | 22   | 6   |
| 369 | 43   | 11 | 17 | 198  | 10 | 14 | 19   | 5   | 6   | 25   | 3   |
| 371 | 16   | 9  | 9  | 17   | 8  | 15 | 16   | 9   | 8   | 19   | 7   |
| 372 | 78   | 9  | 29 | 159  | 1  | 4  | 121  | 17  | 27  | 203  | 21  |
| 373 | 30   | 5  | 4  | 28   | 17 | 10 | 19   | 2   | 9   | 14   | 3   |
| 374 | 44   | 7  | 21 | 32   | 5  | 9  | 23   | 3   | 9   | 15   | 4   |
| 375 | 40   | 14 | 35 | 24   | 2  | 15 | 27   | 13  | 5   | 9    | 2   |
| 376 | 7    | 4  | 1  | 10   | 4  | 1  | 18   | 5   | 14  | 12   | 3   |
| 377 | 7    | 2  | 1  | 15   | 2  | 3  | 24   | 6   | 3   | 13   | 3   |
| 378 | 32   | 8  | 12 | 37   | 25 | 13 | 21   | 3   | 5   | 13   | 3   |
| 379 | 22   | 4  | 9  | 27   | 8  | 2  | 98   | 40  | 42  | 13   | 5   |
| 380 | 88   | 33 | 36 | 90   | 37 | 20 | 62   | 14  | 58  | 7    | 3   |
| 381 | 40   | 16 | 16 | 18   | 5  | 9  | 50   | 17  | 27  | 26   | 16  |
| 382 | 11   | 3  | 13 | 20   | 3  | 2  | 14   | 5   | 5   | 17   | 3   |
| 383 | 20   | 2  | 4  | 30   | 8  | 7  | 33   | 9   | 12  | 27   | 2   |
| 384 | 47   | 9  | 18 | 53   | 7  | 9  | 33   | 9   | 21  | 20   | 8   |

|     |     |    |     |     |     |     |     |     |     |      |     |
|-----|-----|----|-----|-----|-----|-----|-----|-----|-----|------|-----|
| 386 | 39  | 15 | 17  | 39  | 25  | 15  | 22  | 7   | 5   | 14   | 3   |
| 387 | 80  | 39 | 25  | 33  | 5   | 4   | 43  | 17  | 15  | 21   | 9   |
| 388 | 45  | 9  | 3   | 39  | 7   | 24  | 26  | 5   | 5   | 16   | 7   |
| 389 | 74  | 19 | 7   | 54  | 10  | 13  | 37  | 16  | 36  | 23   | 7   |
| 390 | 21  | 4  | 4   | 21  | 1   | 4   | 36  | 5   | 5   | 17   | 9   |
| 392 | 197 | 87 | 160 | 986 | 204 | 174 | 548 | 106 | 28  | 3327 | 284 |
| 394 | 41  | 9  | 15  | 16  | 2   | 4   | 15  | 2   | 5   | 15   | 7   |
| 395 | 32  | 6  | 5   | 37  | 13  | 10  | 120 | 31  | 12  | 27   | 11  |
| 396 | 104 | 9  | 7   | 87  | 4   | 11  | 70  | 32  | 40  | 3075 | 486 |
| 397 | 26  | 11 | 10  | 39  | 22  | 11  | 123 | 26  | 17  | 75   | 64  |
| 398 | 76  | 12 | 68  | 120 | 10  | 16  | 149 | 40  | 7   | 67   | 15  |
| 399 | 28  | 7  | 6   | 36  | 9   | 1   | 23  | 4   | 9   | 15   | 2   |
| 401 | 21  | 3  | 7   | 25  | 6   | 5   | 36  | 11  | 30  | 9    | 2   |
| 402 | 11  | 4  | 11  | 20  | 10  | 32  | 13  | 3   | 6   | 14   | 2   |
| 403 | 11  | 3  | 2   | 36  | 6   | 10  | 53  | 14  | 2   | 17   | 3   |
| 419 | 21  | 3  | 2   | 44  | 5   | 2   | 31  | 8   | 3   | 35   | 20  |
| 420 | 54  | 13 | 6   | 85  | 21  | 10  | 34  | 11  | 9   | 14   | 3   |
| 423 | 42  | 8  | 6   | 51  | 11  | 15  | 26  | 9   | 17  | 19   | 5   |
| 425 | 45  | 5  | 24  | 36  | 9   | 12  | 26  | 6   | 3   | 11   | 2   |
| 426 | 25  | 6  | 9   | 19  | 4   | 12  | 32  | 5   | 13  | 9    | 3   |
| 428 | 13  | 6  | 1   | 17  | 10  | 10  | 20  | 4   | 5   | 12   | 2   |
| 429 | 11  | 3  | 7   | 25  | 6   | 4   | 19  | 4   | 3   | 16   | 7   |
| 431 | 48  | 24 | 24  | 41  | 16  | 6   | 37  | 6   | 19  | 17   | 7   |
| 432 | 37  | 18 | 22  | 29  | 5   | 16  | 30  | 9   | 5   | 10   | 3   |
| 433 | 7   | 3  | 1   | 10  | 5   | 4   | 10  | 2   | 4   | 10   | 1   |
| 434 | 10  | 3  | 8   | 27  | 4   | 4   | 26  | 12  | 18  | 20   | 3   |
| 435 | 56  | 11 | 16  | 39  | 3   | 3   | 36  | 8   | 6   | 19   | 4   |
| 436 | 42  | 13 | 20  | 29  | 9   | 2   | 39  | 8   | 10  | 19   | 3   |
| 437 | 376 | 10 | 13  | 748 | 68  | 22  | 450 | 62  | 140 | 2424 | 474 |
| 479 | 8   | 4  | 9   | 15  | 7   | 11  | 24  | 3   | 4   | 17   | 8   |
| 480 | 108 | 49 | 39  | 350 | 6   | 14  | 218 | 8   | 15  | 373  | 40  |
| 481 | 296 | 46 | 31  | 275 | 24  | 36  | 247 | 4   | 13  | 247  | 6   |
| 483 | 52  | 11 | 17  | 52  | 14  | 13  | 36  | 9   | 33  | 40   | 17  |
| 492 | 29  | 6  | 12  | 29  | 9   | 3   | 54  | 22  | 22  | 9    | 2   |
| 493 | 7   | 3  | 1   | 6   | 2   | 5   | 10  | 2   | 3   | 16   | 7   |
| 495 | 7   | 2  | 3   | 17  | 2   | 2   | 17  | 8   | 7   | 17   | 10  |
| 496 | 34  | 17 | 22  | 30  | 14  | 22  | 40  | 2   | 13  | 48   | 11  |
| 497 | 185 | 11 | 31  | 239 | 31  | 23  | 196 | 90  | 32  | 278  | 72  |
| 498 | 17  | 3  | 6   | 24  | 4   | 10  | 21  | 5   | 17  | 11   | 3   |
| 499 | 6   | 2  | 3   | 12  | 5   | 5   | 14  | 4   | 5   | 11   | 1   |
| 501 | 12  | 4  | 4   | 17  | 5   | 5   | 17  | 5   | 4   | 13   | 3   |
| 502 | 21  | 4  | 8   | 26  | 6   | 16  | 39  | 14  | 17  | 16   | 3   |
| 503 | 20  | 4  | 16  | 20  | 7   | 2   | 40  | 4   | 17  | 42   | 21  |
| 504 | 23  | 5  | 2   | 27  | 4   | 2   | 38  | 8   | 8   | 12   | 5   |
| 505 | 12  | 4  | 4   | 19  | 8   | 17  | 24  | 10  | 7   | 27   | 11  |
| 506 | 87  | 8  | 32  | 249 | 20  | 17  | 203 | 25  | 56  | 278  | 10  |
| 527 | 18  | 3  | 7   | 24  | 10  | 3   | 15  | 2   | 6   | 11   | 4   |
| 528 | 46  | 10 | 13  | 31  | 5   | 10  | 29  | 9   | 1   | 11   | 3   |
| 529 | 20  | 3  | 5   | 19  | 2   | 11  | 36  | 12  | 10  | 9    | 3   |
| 530 | 11  | 1  | 6   | 17  | 9   | 7   | 13  | 3   | 5   | 14   | 5   |

|      |     |     |     |     |    |    |     |     |    |     |     |
|------|-----|-----|-----|-----|----|----|-----|-----|----|-----|-----|
| 531  | 20  | 5   | 1   | 27  | 3  | 7  | 30  | 13  | 10 | 19  | 3   |
| 534  | 57  | 13  | 11  | 42  | 7  | 14 | 32  | 10  | 3  | 11  | 1   |
| 535  | 6   | 2   | 5   | 10  | 6  | 3  | 17  | 3   | 1  | 13  | 5   |
| 536  | 18  | 7   | 7   | 31  | 8  | 7  | 41  | 10  | 13 | 48  | 14  |
| 537  | 25  | 3   | 3   | 30  | 4  | 12 | 38  | 2   | 2  | 21  | 5   |
| 538  | 40  | 15  | 26  | 29  | 6  | 7  | 69  | 34  | 33 | 21  | 5   |
| 539  | 22  | 1   | 3   | 23  | 2  | 2  | 39  | 10  | 10 | 16  | 1   |
| 540  | 5   | 1   | 1   | 7   | 2  | 9  | 18  | 8   | 5  | 11  | 2   |
| 541  | 9   | 2   | 6   | 19  | 2  | 3  | 42  | 3   | 11 | 28  | 6   |
| 542  | 16  | 3   | 6   | 18  | 4  | 3  | 42  | 3   | 3  | 18  | 5   |
| 625  | 11  | 5   | 11  | 15  | 5  | 4  | 13  | 5   | 3  | 16  | 6   |
| 627  | 35  | 9   | 19  | 36  | 3  | 13 | 54  | 4   | 6  | 42  | 6   |
| 800  | 49  | 15  | 17  | 59  | 20 | 5  | 22  | 6   | 13 | 18  | 7   |
| 801  | 33  | 7   | 6   | 47  | 12 | 7  | 19  | 6   | 5  | 9   | 0   |
| 900  | 9   | 2   | 5   | 23  | 11 | 5  | 15  | 5   | 12 | 16  | 4   |
| 1001 | 7   | 4   | 5   | 14  | 4  | 5  | 19  | 2   | 8  | 13  | 6   |
| 1002 | 11  | 4   | 4   | 23  | 3  | 3  | 38  | 11  | 28 | 26  | 10  |
| 1003 | 28  | 4   | 2   | 23  | 6  | 14 | 44  | 6   | 16 | 14  | 4   |
| 1004 | 117 | 25  | 50  | 221 | 65 | 31 | 505 | 111 | 87 | 992 | 218 |
| 1005 | 27  | 5   | 2   | 25  | 3  | 5  | 69  | 10  | 8  | 20  | 8   |
| 1006 | 7   | 4   | 3   | 10  | 3  | 7  | 11  | 2   | 3  | 10  | 3   |
| 1007 | 13  | 6   | 3   | 21  | 2  | 3  | 34  | 11  | 12 | 23  | 9   |
| 1008 | 31  | 3   | 12  | 31  | 7  | 4  | 50  | 12  | 23 | 35  | 6   |
| 1009 | 26  | 10  | 19  | 26  | 9  | 19 | 35  | 6   | 3  | 18  | 4   |
| 1010 | 24  | 3   | 1   | 24  | 3  | 27 | 107 | 24  | 4  | 15  | 3   |
| 1011 | 7   | 3   | 2   | 13  | 1  | 3  | 22  | 12  | 3  | 10  | 2   |
| 1012 | 13  | 3   | 4   | 51  | 11 | 3  | 40  | 15  | 25 | 49  | 13  |
| 1013 | 30  | 9   | 9   | 69  | 16 | 9  | 73  | 15  | 9  | 75  | 20  |
| 1014 | 28  | 9   | 30  | 30  | 4  | 9  | 81  | 23  | 47 | 17  | 6   |
| 1015 | 26  | 4   | 3   | 25  | 5  | 7  | 52  | 17  | 5  | 8   | 2   |
| 1016 | 81  | 19  | 42  | 97  | 19 | 21 | 119 | 37  | 26 | 62  | 52  |
| 1017 | 11  | 3   | 3   | 18  | 3  | 6  | 24  | 6   | 9  | 17  | 2   |
| 1018 | 22  | 4   | 6   | 14  | 3  | 5  | 36  | 2   | 8  | 12  | 4   |
| 1019 | 18  | 3   | 14  | 29  | 12 | 9  | 64  | 21  | 69 | 14  | 5   |
| 1020 | 18  | 1   | 2   | 23  | 4  | 7  | 49  | 27  | 12 | 14  | 7   |
| 1021 | 10  | 3   | 4   | 203 | 37 | 32 | 88  | 29  | 17 | 30  | 10  |
| 1022 | 9   | 2   | 1   | 15  | 4  | 7  | 31  | 6   | 19 | 21  | 6   |
| 1023 | 17  | 3   | 8   | 21  | 8  | 3  | 66  | 11  | 3  | 17  | 2   |
| 1024 | 16  | 3   | 24  | 29  | 9  | 3  | 76  | 7   | 41 | 22  | 8   |
| 1025 | 27  | 2   | 21  | 33  | 16 | 39 | 63  | 17  | 17 | 16  | 5   |
| 1026 | 8   | 3   | 2   | 14  | 5  | 4  | 28  | 12  | 14 | 11  | 1   |
| 1027 | 11  | 2   | 4   | 23  | 3  | 4  | 60  | 15  | 26 | 21  | 4   |
| 1201 | 26  | 4   | 11  | 19  | 5  | 9  | 33  | 10  | 6  | 16  | 1   |
| 1202 | 18  | 7   | 8   | 25  | 2  | 5  | 71  | 18  | 32 | 19  | 3   |
| 1203 | 18  | 2   | 4   | 22  | 3  | 19 | 50  | 16  | 20 | 14  | 4   |
| 1204 | 10  | 5   | 6   | 18  | 7  | 3  | 25  | 7   | 10 | 14  | 1   |
| 1205 | 9   | 1   | 4   | 24  | 7  | 5  | 30  | 7   | 11 | 18  | 7   |
| 1206 | 502 | 222 | 469 | 85  | 31 | 55 | 51  | 15  | 5  | 21  | 7   |
| 1207 | 22  | 4   | 10  | 39  | 7  | 8  | 52  | 6   | 28 | 21  | 6   |
| 1208 | 981 | 108 | 122 | 138 | 7  | 16 | 387 | 71  | 84 | 465 | 67  |

|      |     |     |      |      |     |      |      |      |      |      |     |
|------|-----|-----|------|------|-----|------|------|------|------|------|-----|
| 1209 | 7   | 3   | 9    | 13   | 6   | 4    | 27   | 4    | 2    | 12   | 6   |
| 1210 | 11  | 4   | 3    | 18   | 3   | 1    | 29   | 7    | 14   | 17   | 4   |
| 1211 | 28  | 7   | 1    | 27   | 9   | 5    | 48   | 11   | 6    | 16   | 4   |
| 1212 | 60  | 8   | 13   | 75   | 11  | 13   | 838  | 145  | 28   | 51   | 17  |
| 1213 | 23  | 9   | 5    | 31   | 9   | 5    | 51   | 21   | 11   | 19   | 4   |
| 1214 | 5   | 1   | 3    | 13   | 4   | 4    | 22   | 8    | 9    | 9    | 2   |
| 1215 | 16  | 4   | 6    | 23   | 3   | 12   | 30   | 9    | 12   | 18   | 5   |
| 1216 | 24  | 10  | 7    | 17   | 2   | 5    | 33   | 3    | 6    | 14   | 2   |
| 1217 | 45  | 10  | 31   | 37   | 6   | 16   | 57   | 10   | 52   | 20   | 7   |
| 1218 | 77  | 57  | 93   | 77   | 48  | 46   | 31   | 5    | 25   | 15   | 2   |
| 1219 | 9   | 5   | 24   | 25   | 6   | 2    | 28   | 7    | 9    | 12   | 3   |
| 1220 | 465 | 145 | 180  | 2940 | 233 | 103  | 1922 | 140  | 365  | 8180 | 602 |
| 1221 | 24  | 3   | 20   | 22   | 9   | 8    | 51   | 10   | 8    | 21   | 8   |
| 1222 | 126 | 20  | 76   | 88   | 9   | 7    | 9067 | 1495 | 2362 | 187  | 61  |
| 1223 | 25  | 1   | 1    | 23   | 3   | 4    | 60   | 18   | 23   | 9    | 4   |
| 1224 | 10  | 3   | 0    | 20   | 8   | 15   | 23   | 8    | 6    | 13   | 4   |
| 1225 | 13  | 4   | 3    | 23   | 5   | 6    | 37   | 6    | 15   | 22   | 6   |
| 1226 | 23  | 4   | 11   | 19   | 3   | 2    | 29   | 6    | 4    | 14   | 4   |
| 1230 | 22  | 2   | 25   | 26   | 4   | 5    | 38   | 9    | 23   | 12   | 2   |
| 1231 | 18  | 2   | 6    | 22   | 2   | 5    | 28   | 5    | 37   | 13   | 6   |
| 1232 | 229 | 65  | 160  | 18   | 4   | 2    | 41   | 5    | 13   | 38   | 21  |
| 1233 | 10  | 2   | 1    | 101  | 11  | 9    | 37   | 13   | 10   | 19   | 4   |
| 1234 | 23  | 6   | 2    | 20   | 7   | 7    | 51   | 6    | 15   | 153  | 73  |
| 1238 | 7   | 3   | 3    | 13   | 3   | 4    | 20   | 6    | 3    | 18   | 6   |
| 1239 | 12  | 5   | 1    | 16   | 3   | 4    | 29   | 4    | 6    | 25   | 7   |
| 1240 | 18  | 5   | 4    | 16   | 2   | 3    | 63   | 14   | 24   | 21   | 3   |
| 1241 | 21  | 5   | 11   | 21   | 3   | 7    | 66   | 10   | 36   | 18   | 8   |
| 1401 | 61  | 9   | 44   | 51   | 21  | 11   | 45   | 15   | 25   | 14   | 5   |
| 1402 | 6   | 2   | 4    | 17   | 5   | 3    | 16   | 7    | 2    | 11   | 3   |
| 1403 | 21  | 12  | 4719 | 265  | 31  | 1388 | 60   | 21   | 68   | 29   | 11  |
| 1404 | 25  | 7   | 2    | 23   | 7   | 3    | 43   | 6    | 7    | 14   | 4   |
| 1405 | 27  | 4   | 10   | 35   | 4   | 9    | 365  | 35   | 21   | 23   | 7   |
| 1406 | 24  | 3   | 12   | 24   | 3   | 3    | 33   | 8    | 12   | 19   | 4   |
| 1407 | 8   | 3   | 3    | 16   | 3   | 3    | 20   | 5    | 6    | 10   | 2   |
| 1408 | 16  | 8   | 1    | 33   | 9   | 4    | 30   | 10   | 16   | 14   | 3   |
| 1409 | 38  | 4   | 7    | 27   | 8   | 3    | 29   | 9    | 4    | 64   | 22  |
| 1410 | 49  | 12  | 6    | 37   | 9   | 7    | 56   | 19   | 42   | 99   | 45  |
| 1412 | 23  | 3   | 6    | 32   | 7   | 4    | 29   | 13   | 7    | 14   | 3   |
| 1413 | 16  | 6   | 14   | 30   | 5   | 4    | 18   | 8    | 6    | 16   | 10  |
| 1416 | 52  | 25  | 15   | 1112 | 68  | 61   | 97   | 13   | 9    | 109  | 9   |
| 1418 | 28  | 3   | 35   | 43   | 8   | 15   | 79   | 12   | 11   | 43   | 5   |
| 1501 | 32  | 2   | 11   | 40   | 9   | 7    | 327  | 19   | 105  | 36   | 20  |
| 1601 | 208 | 37  | 90   | 115  | 19  | 30   | 74   | 26   | 29   | 42   | 11  |
| 1602 | 9   | 3   | 4    | 84   | 19  | 29   | 36   | 8    | 11   | 16   | 6   |
| 1603 | 14  | 0   | 6    | 25   | 0   | 5    | 36   | 8    | 28   | 18   | 2   |
| 1605 | 27  | 6   | 57   | 29   | 6   | 24   | 51   | 7    | 22   | 35   | 8   |
| 1606 | 267 | 60  | 20   | 51   | 17  | 16   | 243  | 69   | 71   | 51   | 18  |
| 1607 | 30  | 14  | 31   | 32   | 11  | 11   | 38   | 13   | 44   | 25   | 12  |
| 1608 | 48  | 14  | 23   | 29   | 5   | 6    | 36   | 10   | 18   | 27   | 5   |
| 1609 | 732 | 470 | 6779 | 1855 | 815 | 593  | 86   | 40   | 13   | 110  | 55  |



|      |      |     |     |      |     |     |      |      |     |     |    |
|------|------|-----|-----|------|-----|-----|------|------|-----|-----|----|
| 1610 | 1418 | 89  | 260 | 1852 | 494 | 202 | 145  | 53   | 33  | 99  | 48 |
| 1611 | 37   | 17  | 2   | 36   | 11  | 18  | 51   | 20   | 9   | 10  | 3  |
| 1613 | 54   | 6   | 15  | 127  | 14  | 19  | 52   | 10   | 22  | 54  | 25 |
| 1614 | 1372 | 265 | 153 | 155  | 6   | 4   | 73   | 18   | 13  | 61  | 17 |
| 1615 | 69   | 7   | 21  | 128  | 22  | 21  | 134  | 43   | 26  | 73  | 17 |
| 1616 | 27   | 6   | 11  | 19   | 5   | 6   | 72   | 22   | 14  | 9   | 1  |
| 1617 | 6    | 2   | 1   | 20   | 3   | 3   | 16   | 2    | 11  | 16  | 6  |
| 1618 | 13   | 5   | 8   | 30   | 5   | 6   | 32   | 9    | 14  | 24  | 5  |
| 1701 | 26   | 3   | 3   | 19   | 1   | 8   | 44   | 7    | 12  | 15  | 6  |
| 1702 | 26   | 4   | 13  | 39   | 10  | 2   | 45   | 16   | 13  | 13  | 4  |
| 1703 | 28   | 3   | 1   | 22   | 4   | 3   | 26   | 4    | 24  | 10  | 1  |
| 1705 | 42   | 11  | 22  | 66   | 9   | 21  | 22   | 5    | 7   | 27  | 15 |
| 1706 | 15   | 5   | 4   | 27   | 1   | 1   | 37   | 7    | 20  | 17  | 5  |
| 1707 | 22   | 3   | 3   | 20   | 5   | 8   | 54   | 9    | 6   | 14  | 2  |
| 1801 | 44   | 5   | 9   | 47   | 5   | 5   | 74   | 7    | 31  | 26  | 5  |
| 1802 | 26   | 6   | 2   | 23   | 4   | 4   | 57   | 25   | 18  | 18  | 7  |
| 1804 | 43   | 10  | 38  | 80   | 20  | 1   | 350  | 33   | 22  | 29  | 5  |
| 1806 | 15   | 5   | 1   | 19   | 3   | 4   | 40   | 10   | 14  | 25  | 6  |
| 1807 | 24   | 4   | 9   | 24   | 8   | 4   | 62   | 9    | 2   | 14  | 1  |
| 1808 | 95   | 17  | 12  | 196  | 21  | 30  | 169  | 49   | 26  | 152 | 26 |
| 1809 | 26   | 6   | 4   | 26   | 6   | 4   | 77   | 35   | 8   | 19  | 5  |
| 1810 | 21   | 13  | 14  | 74   | 27  | 25  | 31   | 8    | 10  | 35  | 14 |
| 2001 | 18   | 8   | 5   | 23   | 6   | 1   | 39   | 13   | 10  | 14  | 3  |
| 2002 | 23   | 2   | 4   | 19   | 7   | 5   | 39   | 7    | 19  | 16  | 4  |
| 2003 | 39   | 12  | 29  | 37   | 5   | 6   | 78   | 16   | 28  | 24  | 7  |
| 2004 | 27   | 2   | 5   | 32   | 7   | 5   | 56   | 9    | 9   | 21  | 4  |
| 2005 | 10   | 2   | 5   | 19   | 7   | 2   | 25   | 7    | 7   | 11  | 2  |
| 2006 | 528  | 118 | 176 | 93   | 5   | 10  | 26   | 4    | 11  | 18  | 8  |
| 2007 | 45   | 10  | 3   | 25   | 4   | 4   | 492  | 169  | 132 | 39  | 12 |
| 2008 | 30   | 10  | 209 | 33   | 4   | 5   | 61   | 13   | 20  | 15  | 1  |
| 2009 | 31   | 5   | 4   | 26   | 6   | 15  | 48   | 23   | 31  | 13  | 7  |
| 2010 | 10   | 3   | 11  | 24   | 3   | 15  | 20   | 10   | 10  | 13  | 2  |
| 2011 | 14   | 1   | 6   | 30   | 5   | 6   | 40   | 16   | 6   | 21  | 5  |
| 2012 | 38   | 5   | 6   | 27   | 10  | 3   | 45   | 8    | 20  | 20  | 2  |
| 2013 | 26   | 1   | 15  | 48   | 12  | 10  | 112  | 50   | 35  | 31  | 12 |
| 2101 | 181  | 33  | 48  | 98   | 45  | 28  | 6139 | 1131 | 738 | 155 | 34 |
| 2102 | 8    | 2   | 2   | 41   | 14  | 5   | 36   | 16   | 20  | 22  | 11 |
| 2103 | 17   | 3   | 6   | 33   | 4   | 2   | 57   | 12   | 18  | 24  | 6  |
| 2104 | 28   | 3   | 3   | 26   | 7   | 12  | 53   | 2    | 11  | 17  | 2  |
| 2105 | 445  | 153 | 770 | 513  | 40  | 71  | 67   | 14   | 12  | 112 | 25 |
| 2106 | 27   | 7   | 6   | 22   | 3   | 2   | 52   | 18   | 8   | 13  | 5  |
| 2107 | 7    | 2   | 3   | 24   | 3   | 3   | 16   | 3    | 4   | 16  | 6  |
| 2201 | 18   | 2   | 3   | 26   | 2   | 6   | 34   | 4    | 7   | 16  | 2  |
| 2202 | 28   | 5   | 3   | 20   | 5   | 3   | 34   | 12   | 12  | 15  | 3  |
| 2203 | 29   | 8   | 15  | 30   | 9   | 9   | 55   | 18   | 57  | 22  | 5  |
| 2204 | 21   | 3   | 4   | 19   | 3   | 8   | 55   | 24   | 16  | 11  | 3  |
| 2205 | 12   | 5   | 3   | 151  | 30  | 25  | 97   | 33   | 69  | 33  | 5  |
| 2206 | 20   | 10  | 9   | 38   | 14  | 4   | 36   | 12   | 15  | 26  | 13 |
| 2207 | 28   | 6   | 5   | 28   | 5   | 4   | 71   | 6    | 11  | 16  | 4  |
| 2208 | 34   | 3   | 18  | 38   | 7   | 13  | 56   | 10   | 31  | 18  | 5  |

|      |    |    |      |    |   |    |     |    |    |    |    |
|------|----|----|------|----|---|----|-----|----|----|----|----|
| 2209 | 37 | 11 | 10   | 32 | 9 | 10 | 60  | 18 | 18 | 16 | 2  |
| 2210 | 10 | 4  | 3    | 19 | 4 | 3  | 34  | 5  | 5  | 15 | 2  |
| 2211 | 18 | 6  | 4    | 26 | 2 | 3  | 44  | 6  | 6  | 22 | 7  |
| 2212 | 40 | 6  | 8    | 27 | 3 | 9  | 48  | 5  | 9  | 20 | 2  |
| 3001 | 10 | 4  | 11   | 31 | 9 | 8  | 25  | 14 | 16 | 15 | 5  |
| 3301 | 18 | 9  | 6    | 35 | 8 | 3  | 41  | 9  | 21 | 23 | 3  |
| 3302 | 27 | 10 | 14   | 30 | 4 | 5  | 38  | 12 | 15 | 15 | 6  |
| 3401 | 30 | 4  | 9    | 46 | 8 | 6  | 86  | 34 | 45 | 29 | 11 |
| 9001 | 63 | 13 | 73   | 41 | 8 | 37 | 151 | 33 | 51 | 29 | 10 |
| 9002 | 8  | 4  | 364  | 30 | 3 | 3  | 22  | 10 | 25 | 14 | 5  |
| 9003 | 30 | 5  | 1260 | 45 | 9 | 16 | 46  | 19 | 38 | 18 | 9  |

Supplementary Table 3.6 represents all fluorescent signals (0-65535 RFU, relative fluorescent units) for groups of mice contacted to 4 strains of bacteria (*E. coli* strain W3110, *B. longum* strain NCC270, *B.thetaiotaomicron* strain VPI-5482, *L. reuteri* strain SD2112)

| Mouse ID | 6.1    |        |        | 6.2    |        |        | 6.3    |        |        | 6.4    |        |  |
|----------|--------|--------|--------|--------|--------|--------|--------|--------|--------|--------|--------|--|
| Nr       | Median | -1st Q | +3rd Q | Median | -1st Q | +3rd Q | Median | -1st Q | +3rd Q | Median | -1st Q |  |
| 001      | 54     | 50     | 43     | 57     | 25     | 24     | 78     | 56     | 155    | 74     | 70     |  |
| 002      | 117    | 6      | 122    | 117    | 7      | 18     | 120    | 93     | 42     | 218    | 134    |  |
| 003      | 95     | 58     | 32     | 87     | 50     | 123    | 201    | 160    | 110    | 101    | 76     |  |
| 004      | 39     | 12     | 9      | 15     | 5      | 8      | 107    | 21     | 22     | 78     | 24     |  |
| 005      | 34     | 5      | 13     | 67     | 39     | 88     | 49     | 40     | 22     | 25     | 11     |  |
| 006      | 2480   | 1420   | 869    | 57966  | 22562  | 3474   | 18970  | 7518   | 2073   | 71     | 26     |  |
| 007      | 144    | 92     | 7      | 97     | 18     | 21     | 64     | 27     | 64     | 104    | 59     |  |
| 009      | 24     | 6      | 6      | 15     | 2      | 1      | 47     | 10     | 31     | 40     | 16     |  |
| 010      | 63     | 33     | 5      | 37     | 31     | 32     | 9      | 6      | 2      | 18     | 2      |  |
| 011      | 31     | 14     | 30     | 27     | 13     | 54     | 28     | 17     | 64     | 65     | 41     |  |
| 012      | 122    | 39     | 14     | 33     | 6      | 36     | 42     | 22     | 29     | 77     | 48     |  |
| 013      | 32     | 12     | 37     | 25     | 12     | 29     | 35     | 15     | 54     | 41     | 14     |  |
| 014      | 11     | 8      | 0      | 9      | 6      | 4      | 20     | 6      | 22     | 22     | 14     |  |
| 015      | 10     | 2      | 5      | 23     | 10     | 8      | 15     | 3      | 5      | 17     | 5      |  |
| 016      | 36     | 24     | 25     | 56     | 22     | 35     | 33     | 12     | 22     | 50     | 16     |  |
| 017      | 55     | 20     | 12     | 54     | 24     | 63     | 45     | 21     | 16     | 58     | 33     |  |
| 018      | 23     | 7      | 7      | 40     | 26     | 48     | 48     | 31     | 41     | 69     | 12     |  |
| 019      | 4      | 3      | 1      | 9      | 6      | 10     | 28     | 13     | 16     | 26     | 10     |  |
| 020      | 5309   | 942    | 1388   | 92     | 71     | 48     | 160    | 75     | 92     | 1513   | 143    |  |
| 021      | 25     | 12     | 18     | 20     | 8      | 82     | 26     | 11     | 48     | 70     | 29     |  |
| 022      | 84     | 26     | 8      | 42     | 22     | 21     | 20     | 7      | 8      | 45     | 10     |  |
| 023      | 15     | 5      | 14     | 23     | 12     | 31     | 31     | 6      | 30     | 51     | 7      |  |
| 024      | 7      | 4      | 33     | 7      | 4      | 16     | 18     | 9      | 18     | 13     | 1      |  |
| 025      | 584    | 101    | 233    | 22245  | 11796  | 24971  | 5406   | 1231   | 1687   | 17     | 4      |  |
| 026      | 22     | 14     | 15     | 17     | 5      | 8      | 27     | 7      | 23     | 62     | 32     |  |
| 027      | 32     | 5      | 30     | 17     | 5      | 6      | 24     | 6      | 11     | 60     | 15     |  |
| 037      | 28     | 4      | 5      | 37     | 24     | 44     | 46     | 12     | 102    | 47     | 19     |  |
| 038      | 124    | 88     | 122    | 13     | 5      | 10     | 23     | 10     | 10     | 129    | 94     |  |
| 043      | 22     | 4      | 7      | 35     | 14     | 8      | 58     | 22     | 53     | 97     | 26     |  |
| 044      | 94     | 60     | 19     | 13     | 2      | 33     | 41     | 14     | 18     | 77     | 11     |  |
| 045      | 18     | 3      | 4      | 23     | 16     | 136    | 324    | 34     | 45     | 92     | 16     |  |
| 046      | 4      | 2      | 8      | 2      | 1      | 8      | 16     | 5      | 19     | 20     | 5      |  |
| 047      | 46     | 39     | 18     | 47     | 35     | 487    | 47     | 25     | 63     | 82     | 49     |  |
| 048      | 13     | 9      | 2      | 9      | 4      | 2      | 46     | 23     | 47     | 62     | 28     |  |

|     |     |    |     |     |     |     |     |     |    |     |     |
|-----|-----|----|-----|-----|-----|-----|-----|-----|----|-----|-----|
| 049 | 59  | 12 | 403 | 61  | 16  | 5   | 75  | 31  | 9  | 492 | 198 |
| 050 | 68  | 59 | 290 | 61  | 32  | 560 | 36  | 17  | 32 | 39  | 16  |
| 051 | 9   | 3  | 0   | 7   | 2   | 3   | 25  | 5   | 9  | 96  | 38  |
| 052 | 14  | 2  | 10  | 18  | 8   | 14  | 14  | 8   | 6  | 20  | 12  |
| 053 | 21  | 9  | 13  | 12  | 2   | 9   | 37  | 19  | 12 | 76  | 52  |
| 054 | 56  | 23 | 47  | 37  | 14  | 17  | 32  | 7   | 12 | 38  | 20  |
| 055 | 49  | 35 | 15  | 32  | 22  | 43  | 45  | 29  | 30 | 36  | 14  |
| 071 | 16  | 4  | 7   | 13  | 6   | 20  | 32  | 4   | 7  | 15  | 5   |
| 072 | 17  | 7  | 3   | 11  | 4   | 1   | 13  | 8   | 13 | 18  | 5   |
| 073 | 21  | 14 | 10  | 11  | 4   | 18  | 17  | 8   | 37 | 49  | 30  |
| 074 | 40  | 9  | 24  | 48  | 25  | 9   | 30  | 7   | 13 | 39  | 27  |
| 075 | 35  | 9  | 11  | 29  | 15  | 41  | 27  | 11  | 48 | 37  | 11  |
| 076 | 6   | 4  | 14  | 9   | 5   | 5   | 19  | 8   | 7  | 19  | 13  |
| 077 | 55  | 34 | 9   | 18  | 11  | 30  | 17  | 7   | 14 | 91  | 4   |
| 078 | 18  | 12 | 37  | 19  | 11  | 22  | 25  | 12  | 26 | 36  | 19  |
| 080 | 52  | 37 | 13  | 69  | 10  | 15  | 33  | 7   | 27 | 38  | 13  |
| 081 | 3   | 2  | 7   | 59  | 48  | 56  | 33  | 14  | 8  | 18  | 4   |
| 082 | 14  | 6  | 7   | 10  | 6   | 5   | 18  | 5   | 11 | 16  | 4   |
| 083 | 16  | 8  | 11  | 11  | 5   | 13  | 19  | 6   | 21 | 53  | 17  |
| 084 | 67  | 14 | 9   | 31  | 12  | 6   | 33  | 5   | 12 | 57  | 13  |
| 085 | 13  | 8  | 17  | 28  | 11  | 5   | 27  | 6   | 30 | 32  | 12  |
| 086 | 4   | 1  | 5   | 5   | 4   | 3   | 20  | 9   | 9  | 19  | 5   |
| 087 | 22  | 11 | 6   | 14  | 8   | 2   | 18  | 7   | 10 | 39  | 14  |
| 088 | 27  | 14 | 29  | 45  | 23  | 45  | 30  | 7   | 9  | 73  | 8   |
| 089 | 77  | 25 | 40  | 21  | 8   | 48  | 30  | 9   | 19 | 38  | 11  |
| 092 | 12  | 7  | 5   | 4   | 3   | 2   | 28  | 6   | 16 | 21  | 3   |
| 093 | 12  | 5  | 5   | 12  | 4   | 3   | 13  | 3   | 4  | 18  | 6   |
| 094 | 24  | 13 | 6   | 20  | 7   | 4   | 19  | 6   | 3  | 58  | 22  |
| 096 | 61  | 38 | 16  | 74  | 56  | 58  | 28  | 10  | 8  | 34  | 9   |
| 097 | 28  | 19 | 13  | 8   | 4   | 12  | 17  | 5   | 6  | 23  | 4   |
| 098 | 8   | 2  | 6   | 15  | 9   | 28  | 10  | 5   | 7  | 15  | 6   |
| 099 | 12  | 7  | 9   | 14  | 5   | 141 | 20  | 9   | 9  | 40  | 15  |
| 100 | 33  | 16 | 30  | 25  | 9   | 124 | 24  | 15  | 10 | 27  | 13  |
| 101 | 34  | 28 | 13  | 126 | 85  | 184 | 23  | 16  | 62 | 31  | 15  |
| 102 | 34  | 16 | 9   | 26  | 10  | 8   | 24  | 8   | 13 | 31  | 15  |
| 103 | 16  | 6  | 5   | 17  | 9   | 7   | 19  | 15  | 4  | 101 | 80  |
| 104 | 32  | 14 | 81  | 200 | 132 | 268 | 448 | 153 | 51 | 147 | 63  |
| 105 | 70  | 7  | 20  | 63  | 24  | 15  | 39  | 13  | 32 | 53  | 24  |
| 106 | 97  | 34 | 51  | 62  | 36  | 23  | 50  | 38  | 16 | 24  | 14  |
| 107 | 36  | 15 | 10  | 62  | 17  | 11  | 55  | 22  | 68 | 20  | 8   |
| 110 | 16  | 5  | 21  | 33  | 21  | 11  | 29  | 20  | 19 | 39  | 14  |
| 111 | 193 | 23 | 19  | 17  | 4   | 1   | 42  | 21  | 8  | 64  | 46  |
| 112 | 16  | 5  | 6   | 17  | 6   | 30  | 26  | 15  | 40 | 25  | 6   |
| 113 | 14  | 3  | 9   | 17  | 6   | 10  | 20  | 5   | 4  | 18  | 8   |
| 114 | 12  | 4  | 4   | 8   | 3   | 7   | 8   | 3   | 5  | 18  | 6   |
| 115 | 10  | 8  | 3   | 15  | 9   | 3   | 10  | 2   | 2  | 33  | 20  |
| 116 | 40  | 18 | 31  | 15  | 3   | 9   | 46  | 9   | 9  | 85  | 36  |
| 117 | 14  | 10 | 7   | 37  | 20  | 18  | 21  | 10  | 33 | 18  | 1   |
| 118 | 5   | 2  | 10  | 5   | 2   | 3   | 22  | 14  | 2  | 55  | 36  |
| 119 | 12  | 5  | 5   | 8   | 3   | 2   | 12  | 6   | 6  | 15  | 2   |

|     |      |     |      |      |     |     |      |     |     |      |     |
|-----|------|-----|------|------|-----|-----|------|-----|-----|------|-----|
| 120 | 15   | 11  | 24   | 13   | 8   | 14  | 11   | 1   | 4   | 36   | 16  |
| 121 | 24   | 3   | 23   | 26   | 7   | 8   | 25   | 10  | 6   | 37   | 9   |
| 122 | 13   | 7   | 9    | 9    | 4   | 10  | 27   | 10  | 29  | 21   | 3   |
| 123 | 2    | 1   | 2    | 2    | 1   | 1   | 17   | 11  | 6   | 12   | 4   |
| 125 | 25   | 21  | 45   | 92   | 79  | 46  | 80   | 19  | 49  | 153  | 60  |
| 126 | 39   | 6   | 1    | 19   | 2   | 4   | 43   | 8   | 4   | 42   | 10  |
| 127 | 27   | 12  | 19   | 23   | 9   | 19  | 47   | 8   | 51  | 50   | 12  |
| 128 | 5    | 3   | 17   | 6    | 2   | 6   | 52   | 27  | 12  | 32   | 5   |
| 129 | 23   | 15  | 37   | 13   | 7   | 3   | 24   | 12  | 7   | 38   | 21  |
| 130 | 17   | 9   | 25   | 22   | 8   | 45  | 28   | 11  | 9   | 58   | 11  |
| 131 | 2220 | 107 | 1060 | 1057 | 43  | 148 | 483  | 58  | 93  | 3829 | 555 |
| 132 | 17   | 8   | 5    | 23   | 18  | 13  | 42   | 13  | 17  | 28   | 8   |
| 133 | 3    | 2   | 2    | 3    | 1   | 3   | 19   | 8   | 5   | 26   | 11  |
| 134 | 8    | 4   | 2    | 10   | 2   | 7   | 19   | 14  | 1   | 32   | 18  |
| 135 | 10   | 3   | 11   | 14   | 4   | 9   | 28   | 21  | 14  | 57   | 42  |
| 136 | 65   | 26  | 26   | 24   | 5   | 1   | 54   | 26  | 18  | 66   | 33  |
| 137 | 34   | 17  | 13   | 51   | 22  | 60  | 49   | 30  | 31  | 53   | 32  |
| 138 | 11   | 2   | 10   | 4    | 1   | 6   | 14   | 2   | 14  | 15   | 3   |
| 139 | 15   | 9   | 19   | 9    | 1   | 1   | 11   | 6   | 2   | 24   | 16  |
| 140 | 67   | 27  | 46   | 110  | 50  | 54  | 80   | 46  | 65  | 89   | 62  |
| 142 | 28   | 10  | 13   | 33   | 6   | 3   | 37   | 15  | 40  | 32   | 10  |
| 143 | 10   | 3   | 5    | 8    | 3   | 6   | 16   | 2   | 2   | 18   | 5   |
| 144 | 11   | 6   | 20   | 9    | 2   | 5   | 14   | 10  | 9   | 22   | 6   |
| 145 | 16   | 6   | 19   | 26   | 14  | 23  | 23   | 8   | 15  | 30   | 11  |
| 146 | 73   | 17  | 26   | 55   | 40  | 13  | 38   | 9   | 34  | 98   | 73  |
| 149 | 14   | 8   | 10   | 7    | 1   | 6   | 24   | 10  | 6   | 27   | 7   |
| 150 | 54   | 46  | 39   | 20   | 8   | 89  | 31   | 13  | 9   | 63   | 28  |
| 151 | 49   | 13  | 23   | 19   | 11  | 24  | 28   | 4   | 6   | 38   | 15  |
| 152 | 33   | 27  | 18   | 17   | 4   | 7   | 30   | 9   | 82  | 24   | 5   |
| 153 | 7    | 3   | 14   | 5    | 0   | 1   | 23   | 11  | 5   | 19   | 7   |
| 154 | 14   | 6   | 25   | 8    | 2   | 4   | 24   | 18  | 4   | 28   | 4   |
| 156 | 66   | 16  | 5    | 25   | 13  | 8   | 31   | 4   | 20  | 49   | 15  |
| 158 | 7    | 5   | 13   | 6    | 4   | 6   | 27   | 17  | 8   | 29   | 15  |
| 159 | 20   | 10  | 10   | 12   | 4   | 4   | 13   | 3   | 3   | 29   | 9   |
| 160 | 16   | 8   | 10   | 16   | 7   | 28  | 15   | 2   | 7   | 35   | 1   |
| 161 | 35   | 6   | 11   | 14   | 6   | 3   | 27   | 10  | 10  | 28   | 7   |
| 162 | 34   | 18  | 28   | 37   | 20  | 54  | 36   | 11  | 23  | 36   | 9   |
| 164 | 36   | 26  | 14   | 14   | 5   | 7   | 18   | 6   | 12  | 31   | 12  |
| 165 | 21   | 13  | 13   | 15   | 4   | 5   | 35   | 16  | 7   | 47   | 15  |
| 166 | 48   | 9   | 36   | 860  | 476 | 177 | 2579 | 131 | 199 | 47   | 10  |
| 167 | 63   | 35  | 18   | 50   | 31  | 28  | 70   | 2   | 0   | 45   | 11  |
| 168 | 4    | 2   | 18   | 4    | 2   | 3   | 23   | 13  | 4   | 26   | 10  |
| 169 | 6    | 1   | 3    | 9    | 2   | 5   | 9    | 6   | 5   | 18   | 12  |
| 170 | 24   | 6   | 24   | 33   | 17  | 15  | 29   | 22  | 5   | 31   | 15  |
| 171 | 34   | 20  | 15   | 28   | 4   | 10  | 29   | 17  | 22  | 29   | 16  |
| 173 | 37   | 32  | 33   | 33   | 20  | 31  | 29   | 17  | 22  | 25   | 1   |
| 174 | 21   | 6   | 2    | 9    | 6   | 17  | 26   | 6   | 12  | 31   | 13  |
| 175 | 9    | 3   | 2    | 13   | 4   | 25  | 9    | 5   | 2   | 20   | 12  |
| 176 | 59   | 21  | 18   | 81   | 31  | 31  | 80   | 46  | 17  | 91   | 43  |
| 177 | 164  | 12  | 52   | 401  | 33  | 20  | 323  | 179 | 82  | 175  | 136 |

|     |     |    |    |     |     |     |     |     |     |     |     |
|-----|-----|----|----|-----|-----|-----|-----|-----|-----|-----|-----|
| 178 | 55  | 3  | 10 | 31  | 6   | 12  | 82  | 51  | 67  | 93  | 58  |
| 179 | 18  | 7  | 5  | 8   | 2   | 4   | 28  | 9   | 9   | 25  | 9   |
| 180 | 10  | 3  | 21 | 8   | 1   | 8   | 10  | 5   | 2   | 32  | 14  |
| 181 | 110 | 59 | 17 | 288 | 136 | 77  | 296 | 222 | 95  | 182 | 129 |
| 182 | 69  | 15 | 20 | 26  | 10  | 14  | 44  | 13  | 13  | 26  | 18  |
| 183 | 65  | 17 | 25 | 36  | 18  | 6   | 34  | 20  | 58  | 22  | 3   |
| 184 | 10  | 6  | 6  | 4   | 2   | 1   | 24  | 16  | 7   | 29  | 19  |
| 186 | 36  | 25 | 17 | 25  | 12  | 10  | 28  | 8   | 13  | 59  | 37  |
| 187 | 38  | 6  | 16 | 61  | 11  | 8   | 48  | 9   | 6   | 482 | 208 |
| 188 | 18  | 9  | 13 | 18  | 7   | 4   | 15  | 2   | 4   | 24  | 2   |
| 189 | 10  | 4  | 10 | 12  | 5   | 3   | 42  | 24  | 44  | 50  | 12  |
| 190 | 16  | 7  | 29 | 20  | 11  | 21  | 26  | 14  | 7   | 29  | 12  |
| 191 | 24  | 14 | 14 | 21  | 12  | 15  | 25  | 5   | 17  | 33  | 14  |
| 192 | 37  | 11 | 7  | 29  | 14  | 8   | 45  | 12  | 11  | 41  | 5   |
| 193 | 17  | 10 | 12 | 16  | 7   | 7   | 59  | 29  | 30  | 49  | 29  |
| 194 | 5   | 3  | 3  | 3   | 1   | 3   | 19  | 10  | 6   | 38  | 8   |
| 195 | 13  | 6  | 7  | 14  | 3   | 4   | 22  | 9   | 8   | 30  | 20  |
| 196 | 22  | 11 | 5  | 15  | 7   | 2   | 28  | 1   | 16  | 73  | 35  |
| 197 | 56  | 20 | 44 | 19  | 7   | 16  | 23  | 3   | 6   | 48  | 9   |
| 198 | 67  | 31 | 44 | 12  | 4   | 7   | 43  | 10  | 45  | 54  | 23  |
| 199 | 4   | 2  | 7  | 3   | 1   | 1   | 25  | 17  | 16  | 19  | 6   |
| 200 | 21  | 7  | 8  | 11  | 3   | 4   | 11  | 0   | 6   | 23  | 9   |
| 201 | 27  | 19 | 16 | 17  | 9   | 21  | 54  | 20  | 19  | 80  | 25  |
| 202 | 40  | 7  | 7  | 12  | 4   | 12  | 35  | 7   | 25  | 307 | 57  |
| 203 | 16  | 7  | 18 | 11  | 4   | 9   | 32  | 12  | 1   | 67  | 19  |
| 204 | 3   | 1  | 2  | 3   | 2   | 1   | 20  | 11  | 8   | 13  | 1   |
| 205 | 8   | 4  | 25 | 6   | 2   | 4   | 13  | 7   | 7   | 23  | 17  |
| 206 | 31  | 16 | 20 | 28  | 3   | 16  | 35  | 19  | 36  | 60  | 32  |
| 207 | 38  | 8  | 6  | 41  | 10  | 10  | 33  | 15  | 6   | 34  | 19  |
| 215 | 46  | 35 | 6  | 37  | 9   | 11  | 28  | 19  | 23  | 47  | 21  |
| 216 | 37  | 24 | 11 | 31  | 24  | 24  | 28  | 10  | 26  | 83  | 63  |
| 217 | 32  | 20 | 37 | 14  | 4   | 30  | 9   | 4   | 10  | 33  | 22  |
| 219 | 17  | 4  | 9  | 30  | 14  | 6   | 22  | 9   | 20  | 55  | 26  |
| 220 | 82  | 21 | 97 | 66  | 20  | 86  | 33  | 7   | 4   | 30  | 15  |
| 221 | 16  | 2  | 6  | 17  | 7   | 20  | 44  | 27  | 29  | 43  | 24  |
| 222 | 37  | 13 | 5  | 43  | 18  | 32  | 24  | 6   | 3   | 25  | 9   |
| 223 | 8   | 1  | 5  | 11  | 3   | 4   | 8   | 5   | 10  | 25  | 8   |
| 225 | 78  | 26 | 25 | 65  | 47  | 17  | 34  | 9   | 4   | 31  | 12  |
| 226 | 27  | 17 | 5  | 27  | 16  | 4   | 31  | 21  | 28  | 32  | 6   |
| 227 | 11  | 3  | 12 | 18  | 4   | 4   | 28  | 9   | 6   | 29  | 7   |
| 228 | 12  | 6  | 59 | 31  | 21  | 21  | 21  | 10  | 1   | 48  | 24  |
| 229 | 19  | 11 | 3  | 12  | 8   | 5   | 19  | 2   | 3   | 31  | 15  |
| 231 | 61  | 25 | 27 | 38  | 25  | 18  | 29  | 7   | 5   | 29  | 5   |
| 232 | 28  | 18 | 8  | 26  | 14  | 11  | 30  | 10  | 14  | 194 | 123 |
| 233 | 13  | 6  | 22 | 27  | 10  | 20  | 28  | 14  | 18  | 20  | 2   |
| 234 | 70  | 32 | 10 | 24  | 18  | 57  | 22  | 14  | 8   | 42  | 16  |
| 235 | 52  | 19 | 20 | 524 | 308 | 618 | 266 | 102 | 26  | 91  | 15  |
| 236 | 41  | 25 | 18 | 389 | 364 | 775 | 189 | 98  | 313 | 83  | 16  |
| 237 | 32  | 20 | 4  | 15  | 3   | 0   | 29  | 14  | 14  | 45  | 21  |
| 239 | 42  | 14 | 21 | 11  | 2   | 26  | 21  | 12  | 5   | 25  | 10  |

|     |      |      |      |       |       |    |       |      |     |    |    |
|-----|------|------|------|-------|-------|----|-------|------|-----|----|----|
| 240 | 16   | 8    | 10   | 9     | 2     | 3  | 23    | 10   | 11  | 36 | 6  |
| 241 | 25   | 12   | 17   | 14    | 4     | 10 | 22    | 6    | 7   | 33 | 4  |
| 242 | 16   | 8    | 45   | 19    | 9     | 3  | 28    | 8    | 27  | 22 | 4  |
| 243 | 9    | 5    | 4    | 3     | 2     | 2  | 16    | 7    | 5   | 15 | 3  |
| 245 | 32   | 7    | 9    | 12    | 3     | 12 | 13    | 2    | 1   | 41 | 14 |
| 246 | 28   | 7    | 21   | 19    | 6     | 11 | 38    | 11   | 6   | 48 | 5  |
| 247 | 25   | 4    | 3    | 8     | 1     | 6  | 24    | 3    | 7   | 41 | 12 |
| 248 | 55   | 30   | 53   | 15    | 9     | 4  | 31    | 10   | 30  | 23 | 5  |
| 249 | 11   | 4    | 5    | 8     | 6     | 4  | 16    | 7    | 12  | 23 | 6  |
| 250 | 33   | 25   | 13   | 16    | 8     | 4  | 17    | 9    | 6   | 27 | 21 |
| 251 | 25   | 15   | 16   | 56    | 39    | 42 | 56    | 47   | 26  | 60 | 52 |
| 252 | 27   | 12   | 2    | 15    | 5     | 8  | 21    | 12   | 3   | 22 | 10 |
| 253 | 46   | 36   | 12   | 44    | 6     | 9  | 25    | 15   | 23  | 39 | 20 |
| 254 | 11   | 8    | 6    | 9     | 4     | 6  | 15    | 6    | 9   | 12 | 5  |
| 255 | 18   | 11   | 24   | 11    | 4     | 9  | 16    | 8    | 4   | 21 | 9  |
| 256 | 21   | 14   | 18   | 31    | 10    | 18 | 28    | 18   | 4   | 75 | 42 |
| 258 | 37   | 16   | 8    | 27    | 12    | 13 | 31    | 11   | 5   | 21 | 12 |
| 259 | 55   | 13   | 33   | 70    | 28    | 7  | 33    | 11   | 28  | 33 | 5  |
| 260 | 36   | 12   | 6    | 41    | 21    | 11 | 35    | 14   | 15  | 53 | 12 |
| 261 | 34   | 16   | 21   | 28    | 18    | 47 | 21    | 9    | 7   | 32 | 5  |
| 262 | 13   | 4    | 7    | 15    | 5     | 12 | 15    | 6    | 8   | 27 | 18 |
| 263 | 7006 | 2901 | 1026 | 65535 | 16382 | 0  | 64719 | 3640 | 768 | 27 | 11 |
| 264 | 216  | 54   | 32   | 41    | 18    | 23 | 21    | 5    | 18  | 30 | 13 |
| 266 | 61   | 16   | 16   | 17    | 5     | 20 | 13    | 2    | 14  | 35 | 11 |
| 267 | 57   | 24   | 41   | 44    | 33    | 27 | 98    | 23   | 30  | 89 | 37 |
| 268 | 33   | 17   | 17   | 17    | 8     | 22 | 43    | 5    | 11  | 45 | 9  |
| 287 | 21   | 16   | 11   | 12    | 5     | 8  | 26    | 17   | 29  | 26 | 14 |
| 288 | 5    | 1    | 3    | 8     | 5     | 3  | 20    | 11   | 7   | 13 | 3  |
| 289 | 31   | 22   | 14   | 13    | 5     | 11 | 21    | 9    | 8   | 28 | 14 |
| 290 | 24   | 7    | 8    | 14    | 6     | 4  | 20    | 10   | 4   | 51 | 29 |
| 291 | 45   | 13   | 19   | 16    | 6     | 5  | 39    | 13   | 12  | 44 | 12 |
| 292 | 19   | 12   | 9    | 9     | 1     | 3  | 26    | 13   | 38  | 20 | 7  |
| 293 | 1    | 0    | 2    | 3     | 1     | 1  | 15    | 8    | 5   | 14 | 3  |
| 294 | 18   | 10   | 10   | 13    | 5     | 4  | 22    | 9    | 2   | 38 | 14 |
| 295 | 38   | 15   | 16   | 36    | 19    | 42 | 23    | 3    | 23  | 45 | 7  |
| 296 | 35   | 18   | 10   | 12    | 4     | 6  | 28    | 4    | 5   | 55 | 10 |
| 297 | 18   | 9    | 24   | 14    | 6     | 4  | 39    | 19   | 40  | 19 | 6  |
| 298 | 7    | 5    | 5    | 10    | 6     | 7  | 15    | 7    | 6   | 17 | 2  |
| 299 | 28   | 19   | 31   | 15    | 4     | 4  | 17    | 4    | 9   | 32 | 9  |
| 300 | 64   | 15   | 6    | 33    | 10    | 13 | 35    | 19   | 6   | 43 | 10 |
| 302 | 45   | 25   | 20   | 15    | 8     | 19 | 37    | 19   | 62  | 17 | 1  |
| 303 | 14   | 6    | 17   | 8     | 6     | 8  | 24    | 15   | 15  | 22 | 5  |
| 304 | 7    | 2    | 2    | 8     | 2     | 1  | 10    | 5    | 10  | 21 | 10 |
| 305 | 32   | 7    | 20   | 21    | 9     | 20 | 33    | 22   | 45  | 41 | 28 |
| 306 | 35   | 22   | 16   | 19    | 9     | 9  | 19    | 14   | 2   | 19 | 8  |
| 307 | 21   | 11   | 7    | 18    | 6     | 18 | 27    | 19   | 10  | 18 | 10 |
| 308 | 11   | 6    | 28   | 12    | 5     | 6  | 21    | 12   | 13  | 21 | 4  |
| 309 | 6    | 2    | 1    | 8     | 2     | 3  | 14    | 7    | 2   | 28 | 11 |
| 310 | 25   | 8    | 16   | 27    | 12    | 7  | 17    | 8    | 6   | 31 | 15 |
| 315 | 22   | 9    | 3    | 35    | 12    | 16 | 30    | 10   | 19  | 33 | 12 |

|     |     |     |     |      |     |      |      |     |     |      |     |
|-----|-----|-----|-----|------|-----|------|------|-----|-----|------|-----|
| 318 | 53  | 14  | 15  | 42   | 19  | 14   | 28   | 15  | 28  | 62   | 41  |
| 319 | 90  | 56  | 22  | 27   | 16  | 25   | 55   | 15  | 16  | 39   | 21  |
| 320 | 60  | 26  | 16  | 57   | 8   | 8    | 78   | 32  | 24  | 60   | 33  |
| 321 | 4   | 2   | 7   | 6    | 2   | 3    | 14   | 3   | 7   | 15   | 5   |
| 322 | 14  | 6   | 12  | 9    | 1   | 4    | 12   | 2   | 4   | 25   | 7   |
| 323 | 47  | 16  | 8   | 18   | 3   | 7    | 23   | 6   | 10  | 36   | 21  |
| 324 | 49  | 19  | 27  | 62   | 43  | 36   | 42   | 6   | 2   | 42   | 11  |
| 325 | 15  | 9   | 2   | 9    | 1   | 5    | 35   | 11  | 29  | 34   | 13  |
| 326 | 4   | 3   | 6   | 2    | 0   | 3    | 21   | 13  | 18  | 18   | 4   |
| 327 | 17  | 10  | 16  | 14   | 4   | 1    | 17   | 4   | 19  | 36   | 12  |
| 328 | 41  | 8   | 10  | 28   | 10  | 7    | 45   | 15  | 15  | 75   | 11  |
| 329 | 80  | 7   | 18  | 131  | 91  | 55   | 317  | 20  | 34  | 78   | 8   |
| 330 | 22  | 13  | 2   | 11   | 3   | 2    | 44   | 13  | 23  | 32   | 10  |
| 331 | 4   | 2   | 9   | 4    | 2   | 2    | 22   | 13  | 6   | 24   | 7   |
| 332 | 22  | 13  | 12  | 11   | 2   | 1    | 17   | 4   | 6   | 34   | 11  |
| 333 | 37  | 15  | 8   | 20   | 8   | 18   | 32   | 9   | 19  | 37   | 6   |
| 334 | 61  | 20  | 11  | 25   | 15  | 16   | 51   | 12  | 11  | 47   | 9   |
| 335 | 15  | 6   | 11  | 9    | 5   | 5    | 32   | 14  | 28  | 22   | 9   |
| 359 | 9   | 6   | 7   | 5    | 4   | 10   | 17   | 9   | 13  | 18   | 6   |
| 360 | 28  | 17  | 25  | 12   | 5   | 5    | 17   | 2   | 4   | 42   | 17  |
| 361 | 59  | 13  | 49  | 38   | 3   | 12   | 46   | 14  | 16  | 81   | 7   |
| 362 | 414 | 40  | 42  | 124  | 77  | 53   | 269  | 25  | 14  | 868  | 23  |
| 363 | 21  | 16  | 17  | 11   | 6   | 7    | 35   | 18  | 38  | 149  | 85  |
| 364 | 432 | 265 | 116 | 386  | 189 | 181  | 816  | 203 | 68  | 527  | 127 |
| 365 | 35  | 26  | 43  | 27   | 11  | 38   | 8    | 5   | 4   | 133  | 121 |
| 366 | 32  | 15  | 5   | 381  | 185 | 21   | 207  | 170 | 95  | 64   | 37  |
| 368 | 31  | 16  | 10  | 1980 | 289 | 1376 | 1196 | 721 | 670 | 85   | 35  |
| 369 | 43  | 13  | 10  | 2903 | 274 | 142  | 1617 | 672 | 921 | 58   | 12  |
| 371 | 28  | 18  | 3   | 13   | 2   | 7    | 10   | 6   | 6   | 26   | 15  |
| 372 | 139 | 40  | 18  | 144  | 22  | 13   | 111  | 95  | 38  | 189  | 126 |
| 373 | 50  | 15  | 12  | 25   | 7   | 5    | 28   | 11  | 8   | 30   | 18  |
| 374 | 26  | 2   | 6   | 29   | 8   | 22   | 26   | 2   | 12  | 28   | 9   |
| 375 | 9   | 2   | 5   | 8    | 1   | 4    | 21   | 3   | 2   | 19   | 7   |
| 376 | 13  | 7   | 7   | 10   | 8   | 0    | 10   | 4   | 4   | 22   | 7   |
| 377 | 19  | 12  | 2   | 13   | 3   | 7    | 19   | 7   | 15  | 50   | 31  |
| 378 | 50  | 12  | 10  | 32   | 11  | 18   | 32   | 5   | 2   | 31   | 9   |
| 379 | 10  | 4   | 2   | 9    | 4   | 2    | 24   | 14  | 11  | 19   | 11  |
| 380 | 7   | 4   | 5   | 8    | 5   | 2    | 15   | 5   | 9   | 20   | 4   |
| 381 | 41  | 29  | 12  | 28   | 12  | 19   | 15   | 5   | 6   | 23   | 9   |
| 382 | 15  | 6   | 16  | 24   | 10  | 22   | 25   | 12  | 6   | 34   | 20  |
| 383 | 41  | 10  | 8   | 21   | 7   | 8    | 36   | 5   | 7   | 44   | 16  |
| 384 | 28  | 16  | 13  | 11   | 2   | 2    | 20   | 7   | 34  | 26   | 6   |
| 386 | 49  | 15  | 15  | 20   | 12  | 37   | 25   | 10  | 9   | 41   | 14  |
| 387 | 39  | 12  | 5   | 28   | 10  | 12   | 25   | 1   | 4   | 47   | 20  |
| 388 | 59  | 5   | 20  | 39   | 17  | 12   | 34   | 4   | 4   | 44   | 5   |
| 389 | 20  | 10  | 21  | 18   | 4   | 9    | 39   | 27  | 68  | 25   | 16  |
| 390 | 2   | 1   | 4   | 2    | 1   | 3    | 16   | 10  | 8   | 15   | 6   |
| 392 | 618 | 156 | 133 | 2015 | 200 | 355  | 2073 | 255 | 435 | 2536 | 36  |
| 394 | 25  | 8   | 8   | 11   | 4   | 14   | 19   | 2   | 9   | 37   | 10  |
| 395 | 18  | 12  | 13  | 6    | 2   | 4    | 26   | 15  | 16  | 26   | 12  |

|     |     |    |    |     |    |     |     |     |     |     |     |
|-----|-----|----|----|-----|----|-----|-----|-----|-----|-----|-----|
| 396 | 35  | 19 | 15 | 24  | 10 | 12  | 35  | 18  | 10  | 37  | 8   |
| 397 | 53  | 17 | 17 | 45  | 33 | 37  | 99  | 21  | 9   | 110 | 58  |
| 398 | 115 | 26 | 13 | 140 | 26 | 12  | 115 | 23  | 24  | 713 | 21  |
| 399 | 37  | 4  | 10 | 15  | 4  | 10  | 32  | 2   | 4   | 37  | 9   |
| 401 | 4   | 2  | 1  | 3   | 2  | 0   | 12  | 3   | 6   | 18  | 5   |
| 402 | 29  | 15 | 9  | 29  | 18 | 92  | 32  | 24  | 59  | 106 | 98  |
| 403 | 22  | 7  | 6  | 19  | 8  | 4   | 29  | 21  | 9   | 44  | 28  |
| 419 | 45  | 9  | 3  | 27  | 5  | 11  | 33  | 15  | 11  | 23  | 15  |
| 420 | 17  | 4  | 10 | 26  | 7  | 6   | 36  | 22  | 4   | 25  | 4   |
| 423 | 61  | 19 | 8  | 51  | 10 | 14  | 24  | 22  | 1   | 36  | 14  |
| 425 | 59  | 13 | 24 | 39  | 9  | 21  | 35  | 11  | 4   | 21  | 15  |
| 426 | 17  | 7  | 1  | 11  | 2  | 4   | 21  | 7   | 1   | 33  | 11  |
| 428 | 44  | 25 | 13 | 20  | 3  | 12  | 17  | 7   | 6   | 27  | 9   |
| 429 | 38  | 14 | 8  | 26  | 3  | 10  | 26  | 5   | 14  | 36  | 16  |
| 431 | 13  | 7  | 10 | 23  | 4  | 8   | 50  | 30  | 24  | 42  | 27  |
| 432 | 6   | 3  | 5  | 6   | 1  | 4   | 24  | 12  | 9   | 18  | 4   |
| 433 | 28  | 15 | 3  | 17  | 3  | 6   | 11  | 0   | 3   | 17  | 3   |
| 434 | 26  | 11 | 12 | 19  | 6  | 3   | 27  | 7   | 29  | 63  | 40  |
| 435 | 69  | 19 | 8  | 57  | 9  | 5   | 60  | 21  | 14  | 76  | 13  |
| 436 | 17  | 16 | 2  | 9   | 1  | 2   | 34  | 19  | 39  | 35  | 12  |
| 437 | 78  | 33 | 97 | 313 | 62 | 43  | 726 | 243 | 153 | 434 | 188 |
| 479 | 26  | 14 | 3  | 17  | 9  | 14  | 16  | 8   | 4   | 33  | 9   |
| 480 | 201 | 37 | 15 | 237 | 14 | 8   | 190 | 89  | 49  | 400 | 221 |
| 481 | 295 | 25 | 26 | 211 | 19 | 55  | 267 | 11  | 9   | 276 | 22  |
| 483 | 18  | 15 | 19 | 16  | 6  | 6   | 35  | 24  | 33  | 37  | 19  |
| 492 | 5   | 1  | 2  | 2   | 1  | 3   | 12  | 5   | 9   | 10  | 5   |
| 493 | 14  | 3  | 6  | 17  | 6  | 3   | 16  | 6   | 2   | 48  | 15  |
| 495 | 17  | 4  | 4  | 18  | 3  | 2   | 26  | 9   | 7   | 53  | 13  |
| 496 | 30  | 7  | 9  | 18  | 8  | 103 | 52  | 12  | 3   | 85  | 15  |
| 497 | 64  | 46 | 24 | 69  | 40 | 48  | 80  | 31  | 80  | 149 | 110 |
| 498 | 2   | 0  | 1  | 2   | 1  | 2   | 16  | 5   | 4   | 11  | 3   |
| 499 | 33  | 14 | 4  | 23  | 7  | 61  | 19  | 9   | 9   | 30  | 18  |
| 501 | 21  | 9  | 4  | 17  | 5  | 6   | 28  | 11  | 12  | 43  | 19  |
| 502 | 35  | 15 | 22 | 25  | 5  | 8   | 32  | 12  | 10  | 45  | 30  |
| 503 | 9   | 3  | 5  | 10  | 4  | 13  | 32  | 7   | 7   | 24  | 1   |
| 504 | 3   | 1  | 2  | 4   | 1  | 2   | 15  | 5   | 11  | 11  | 1   |
| 505 | 39  | 15 | 7  | 16  | 10 | 25  | 23  | 10  | 12  | 39  | 30  |
| 506 | 196 | 39 | 24 | 206 | 22 | 49  | 219 | 175 | 29  | 342 | 134 |
| 527 | 30  | 6  | 10 | 23  | 6  | 7   | 15  | 3   | 1   | 16  | 10  |
| 528 | 28  | 9  | 5  | 24  | 6  | 4   | 34  | 7   | 3   | 29  | 7   |
| 529 | 4   | 1  | 8  | 4   | 1  | 1   | 16  | 4   | 6   | 16  | 8   |
| 530 | 32  | 16 | 11 | 19  | 10 | 15  | 9   | 4   | 3   | 17  | 5   |
| 531 | 43  | 13 | 10 | 31  | 9  | 6   | 30  | 10  | 38  | 51  | 30  |
| 534 | 6   | 3  | 6  | 16  | 8  | 6   | 24  | 10  | 6   | 15  | 5   |
| 535 | 18  | 7  | 4  | 11  | 4  | 4   | 11  | 4   | 4   | 26  | 5   |
| 536 | 30  | 10 | 12 | 41  | 17 | 9   | 45  | 14  | 37  | 59  | 20  |
| 537 | 32  | 5  | 6  | 24  | 7  | 3   | 47  | 14  | 3   | 60  | 14  |
| 538 | 15  | 9  | 7  | 9   | 3  | 3   | 20  | 11  | 13  | 33  | 19  |
| 539 | 3   | 2  | 3  | 2   | 1  | 1   | 20  | 10  | 9   | 16  | 5   |
| 540 | 14  | 7  | 6  | 13  | 5  | 8   | 18  | 5   | 2   | 38  | 10  |



|      |      |     |     |    |    |     |     |    |     |     |     |
|------|------|-----|-----|----|----|-----|-----|----|-----|-----|-----|
| 541  | 26   | 12  | 5   | 22 | 3  | 3   | 34  | 14 | 22  | 61  | 16  |
| 542  | 49   | 13  | 10  | 12 | 3  | 2   | 40  | 7  | 12  | 71  | 14  |
| 625  | 29   | 11  | 1   | 15 | 5  | 10  | 19  | 6  | 2   | 32  | 5   |
| 627  | 55   | 8   | 6   | 37 | 8  | 15  | 57  | 8  | 9   | 66  | 10  |
| 800  | 11   | 8   | 3   | 23 | 9  | 4   | 31  | 13 | 7   | 10  | 4   |
| 801  | 51   | 16  | 22  | 65 | 23 | 38  | 28  | 10 | 19  | 36  | 15  |
| 900  | 27   | 6   | 4   | 23 | 11 | 4   | 33  | 8  | 8   | 44  | 13  |
| 1001 | 31   | 13  | 11  | 18 | 5  | 12  | 13  | 3  | 6   | 30  | 8   |
| 1002 | 60   | 32  | 14  | 71 | 22 | 11  | 107 | 56 | 67  | 632 | 229 |
| 1003 | 59   | 17  | 13  | 11 | 4  | 4   | 41  | 8  | 8   | 49  | 10  |
| 1004 | 33   | 18  | 15  | 33 | 8  | 56  | 125 | 77 | 127 | 107 | 67  |
| 1005 | 3    | 1   | 2   | 2  | 1  | 0   | 9   | 6  | 8   | 7   | 2   |
| 1006 | 19   | 8   | 2   | 15 | 4  | 2   | 13  | 4  | 1   | 24  | 6   |
| 1007 | 29   | 9   | 6   | 15 | 5  | 6   | 36  | 10 | 8   | 99  | 43  |
| 1008 | 30   | 5   | 4   | 12 | 5  | 14  | 44  | 10 | 16  | 80  | 34  |
| 1009 | 4    | 2   | 3   | 3  | 2  | 2   | 20  | 9  | 41  | 17  | 7   |
| 1010 | 4    | 2   | 3   | 2  | 1  | 3   | 7   | 3  | 4   | 6   | 3   |
| 1011 | 30   | 20  | 16  | 16 | 10 | 8   | 6   | 3  | 7   | 15  | 6   |
| 1012 | 15   | 8   | 22  | 55 | 17 | 26  | 25  | 21 | 19  | 53  | 32  |
| 1013 | 24   | 11  | 14  | 28 | 6  | 14  | 49  | 28 | 16  | 59  | 41  |
| 1014 | 19   | 4   | 7   | 15 | 8  | 8   | 28  | 21 | 30  | 21  | 11  |
| 1015 | 3    | 1   | 2   | 4  | 1  | 5   | 7   | 3  | 3   | 4   | 1   |
| 1016 | 99   | 32  | 14  | 27 | 18 | 19  | 14  | 10 | 4   | 32  | 25  |
| 1017 | 20   | 9   | 9   | 27 | 5  | 10  | 25  | 15 | 7   | 36  | 19  |
| 1018 | 40   | 22  | 25  | 24 | 7  | 12  | 25  | 7  | 4   | 18  | 3   |
| 1019 | 17   | 7   | 3   | 8  | 2  | 3   | 28  | 15 | 31  | 19  | 6   |
| 1020 | 4    | 2   | 3   | 2  | 1  | 3   | 5   | 0  | 2   | 4   | 2   |
| 1021 | 128  | 31  | 33  | 55 | 43 | 141 | 41  | 33 | 12  | 48  | 39  |
| 1022 | 21   | 7   | 10  | 16 | 2  | 9   | 26  | 15 | 18  | 41  | 23  |
| 1023 | 44   | 4   | 23  | 19 | 0  | 4   | 31  | 7  | 30  | 32  | 8   |
| 1024 | 16   | 9   | 12  | 6  | 2  | 2   | 23  | 6  | 38  | 16  | 9   |
| 1025 | 3    | 1   | 2   | 7  | 5  | 5   | 11  | 6  | 3   | 7   | 2   |
| 1026 | 31   | 16  | 5   | 12 | 5  | 18  | 10  | 4  | 1   | 20  | 10  |
| 1027 | 56   | 23  | 14  | 22 | 5  | 11  | 30  | 17 | 9   | 59  | 23  |
| 1201 | 39   | 5   | 9   | 14 | 2  | 1   | 19  | 6  | 1   | 37  | 14  |
| 1202 | 6    | 3   | 10  | 3  | 1  | 0   | 20  | 10 | 64  | 30  | 22  |
| 1203 | 2    | 1   | 3   | 3  | 2  | 2   | 8   | 4  | 4   | 5   | 1   |
| 1204 | 130  | 43  | 7   | 19 | 6  | 8   | 7   | 1  | 7   | 22  | 11  |
| 1205 | 33   | 19  | 28  | 24 | 3  | 15  | 19  | 7  | 2   | 49  | 11  |
| 1206 | 84   | 25  | 31  | 27 | 9  | 25  | 50  | 25 | 8   | 58  | 9   |
| 1207 | 11   | 6   | 6   | 3  | 1  | 2   | 24  | 18 | 50  | 27  | 10  |
| 1208 | 1425 | 372 | 312 | 28 | 13 | 22  | 31  | 12 | 8   | 157 | 27  |
| 1209 | 27   | 14  | 8   | 15 | 6  | 11  | 11  | 5  | 6   | 25  | 8   |
| 1210 | 25   | 9   | 8   | 20 | 9  | 22  | 27  | 11 | 24  | 38  | 11  |
| 1211 | 45   | 7   | 9   | 16 | 5  | 6   | 31  | 6  | 17  | 35  | 18  |
| 1212 | 90   | 55  | 49  | 12 | 6  | 12  | 163 | 56 | 87  | 266 | 108 |
| 1213 | 4    | 1   | 1   | 2  | 1  | 2   | 8   | 4  | 2   | 4   | 2   |
| 1214 | 25   | 16  | 2   | 14 | 2  | 1   | 10  | 2  | 5   | 31  | 16  |
| 1215 | 29   | 19  | 14  | 17 | 5  | 5   | 35  | 17 | 25  | 51  | 27  |
| 1216 | 28   | 11  | 17  | 8  | 1  | 1   | 34  | 16 | 14  | 33  | 13  |

|      |      |      |      |      |     |      |      |      |     |      |      |
|------|------|------|------|------|-----|------|------|------|-----|------|------|
| 1217 | 41   | 29   | 18   | 4    | 1   | 2    | 24   | 15   | 32  | 12   | 1    |
| 1218 | 3    | 1    | 6    | 6    | 4   | 27   | 6    | 1    | 2   | 5    | 2    |
| 1219 | 41   | 31   | 14   | 42   | 23  | 10   | 11   | 8    | 5   | 17   | 11   |
| 1220 | 1056 | 566  | 601  | 5399 | 728 | 951  | 6354 | 1801 | 388 | 4955 | 1388 |
| 1221 | 18   | 2    | 15   | 14   | 2   | 5    | 32   | 24   | 13  | 27   | 16   |
| 1222 | 900  | 303  | 148  | 92   | 12  | 13   | 1398 | 520  | 95  | 2435 | 708  |
| 1223 | 5    | 3    | 2    | 6    | 3   | 5    | 5    | 2    | 2   | 3    | 1    |
| 1224 | 43   | 15   | 5    | 27   | 19  | 3    | 10   | 9    | 1   | 73   | 62   |
| 1225 | 29   | 11   | 14   | 38   | 2   | 41   | 25   | 12   | 12  | 37   | 23   |
| 1226 | 27   | 9    | 25   | 24   | 5   | 10   | 25   | 7    | 14  | 19   | 4    |
| 1230 | 13   | 2    | 5    | 12   | 1   | 3    | 28   | 14   | 27  | 17   | 6    |
| 1231 | 2    | 0    | 3    | 2    | 1   | 1    | 6    | 2    | 1   | 5    | 2    |
| 1232 | 32   | 18   | 16   | 8    | 3   | 15   | 13   | 7    | 5   | 46   | 35   |
| 1233 | 20   | 7    | 8    | 19   | 3   | 3    | 23   | 14   | 9   | 22   | 7    |
| 1234 | 30   | 6    | 24   | 17   | 5   | 4    | 37   | 13   | 8   | 33   | 12   |
| 1238 | 26   | 14   | 7    | 14   | 8   | 7    | 12   | 3    | 1   | 20   | 7    |
| 1239 | 25   | 9    | 12   | 26   | 5   | 13   | 20   | 7    | 17  | 58   | 28   |
| 1240 | 36   | 11   | 4    | 13   | 5   | 5    | 44   | 8    | 23  | 92   | 45   |
| 1241 | 12   | 9    | 2    | 6    | 4   | 7    | 29   | 12   | 35  | 26   | 15   |
| 1401 | 2    | 0    | 1    | 2    | 1   | 2    | 4    | 1    | 3   | 7    | 3    |
| 1402 | 23   | 7    | 6    | 16   | 7   | 3    | 12   | 5    | 4   | 19   | 7    |
| 1403 | 50   | 20   | 349  | 678  | 69  | 1706 | 791  | 394  | 737 | 71   | 23   |
| 1404 | 41   | 4    | 5    | 11   | 3   | 1    | 35   | 7    | 9   | 21   | 4    |
| 1405 | 75   | 52   | 13   | 5    | 3   | 5    | 52   | 26   | 51  | 93   | 25   |
| 1406 | 3    | 1    | 2    | 3    | 2   | 1    | 6    | 2    | 5   | 4    | 1    |
| 1407 | 22   | 7    | 9    | 22   | 12  | 4    | 11   | 3    | 2   | 36   | 16   |
| 1408 | 29   | 8    | 9    | 26   | 11  | 17   | 15   | 1    | 3   | 46   | 19   |
| 1409 | 33   | 8    | 5    | 14   | 2   | 4    | 28   | 11   | 2   | 34   | 15   |
| 1410 | 9    | 4    | 6    | 6    | 3   | 3    | 16   | 12   | 2   | 11   | 2    |
| 1412 | 16   | 9    | 13   | 14   | 11  | 4    | 15   | 5    | 2   | 11   | 4    |
| 1413 | 39   | 14   | 11   | 25   | 11  | 10   | 14   | 4    | 2   | 28   | 6    |
| 1416 | 462  | 158  | 21   | 147  | 16  | 12   | 126  | 32   | 13  | 45   | 9    |
| 1418 | 32   | 7    | 2    | 16   | 9   | 17   | 41   | 14   | 8   | 42   | 13   |
| 1501 | 27   | 23   | 42   | 7    | 2   | 10   | 80   | 38   | 57  | 85   | 16   |
| 1601 | 22   | 15   | 16   | 5    | 4   | 2    | 8    | 1    | 7   | 8    | 2    |
| 1602 | 52   | 43   | 19   | 39   | 26  | 43   | 10   | 8    | 4   | 10   | 8    |
| 1603 | 31   | 12   | 24   | 31   | 2   | 11   | 18   | 10   | 17  | 67   | 38   |
| 1605 | 10   | 1    | 1    | 12   | 2   | 2    | 20   | 11   | 34  | 41   | 24   |
| 1606 | 3020 | 1790 | 2366 | 56   | 19  | 45   | 8    | 2    | 6   | 44   | 8    |
| 1607 | 50   | 23   | 15   | 26   | 7   | 55   | 48   | 28   | 43  | 85   | 70   |
| 1608 | 47   | 20   | 11   | 47   | 17  | 25   | 45   | 21   | 22  | 119  | 42   |
| 1609 | 726  | 362  | 547  | 157  | 46  | 46   | 126  | 29   | 27  | 134  | 92   |
| 1610 | 189  | 97   | 40   | 406  | 52  | 99   | 239  | 92   | 70  | 562  | 156  |
| 1611 | 3    | 1    | 4    | 6    | 4   | 11   | 6    | 1    | 3   | 7    | 3    |
| 1613 | 504  | 93   | 29   | 376  | 37  | 12   | 245  | 54   | 28  | 250  | 114  |
| 1614 | 283  | 50   | 97   | 160  | 21  | 39   | 153  | 23   | 24  | 164  | 86   |
| 1615 | 33   | 17   | 15   | 25   | 5   | 6    | 48   | 13   | 104 | 55   | 30   |
| 1616 | 1    | 0    | 3    | 3    | 2   | 0    | 3    | 0    | 2   | 4    | 2    |
| 1617 | 30   | 12   | 15   | 22   | 13  | 15   | 9    | 3    | 10  | 29   | 19   |
| 1618 | 31   | 20   | 3    | 20   | 4   | 7    | 30   | 12   | 11  | 47   | 30   |

|      |      |     |     |     |    |    |     |     |    |     |     |
|------|------|-----|-----|-----|----|----|-----|-----|----|-----|-----|
| 1701 | 26   | 5   | 6   | 11  | 3  | 8  | 30  | 6   | 6  | 21  | 4   |
| 1702 | 10   | 8   | 7   | 5   | 2  | 2  | 32  | 22  | 33 | 14  | 7   |
| 1703 | 3    | 2   | 0   | 2   | 0  | 0  | 3   | 1   | 1  | 3   | 1   |
| 1705 | 79   | 15  | 17  | 54  | 27 | 16 | 13  | 4   | 8  | 27  | 8   |
| 1706 | 36   | 20  | 10  | 27  | 11 | 19 | 23  | 8   | 17 | 38  | 11  |
| 1707 | 25   | 5   | 7   | 13  | 5  | 8  | 52  | 2   | 2  | 93  | 17  |
| 1801 | 22   | 9   | 5   | 6   | 3  | 7  | 47  | 29  | 28 | 29  | 19  |
| 1802 | 4    | 2   | 3   | 2   | 1  | 0  | 3   | 1   | 2  | 3   | 2   |
| 1804 | 545  | 228 | 146 | 72  | 27 | 70 | 147 | 31  | 30 | 405 | 104 |
| 1806 | 27   | 7   | 15  | 19  | 4  | 11 | 33  | 12  | 4  | 58  | 13  |
| 1807 | 30   | 5   | 10  | 10  | 2  | 4  | 31  | 5   | 5  | 59  | 12  |
| 1808 | 9    | 3   | 7   | 67  | 33 | 44 | 108 | 53  | 97 | 16  | 5   |
| 1809 | 5    | 3   | 1   | 3   | 2  | 5  | 8   | 5   | 4  | 3   | 1   |
| 1810 | 44   | 19  | 5   | 34  | 19 | 28 | 32  | 15  | 7  | 41  | 25  |
| 2001 | 30   | 9   | 6   | 44  | 18 | 19 | 68  | 17  | 28 | 55  | 31  |
| 2002 | 32   | 9   | 6   | 9   | 4  | 6  | 32  | 6   | 4  | 49  | 19  |
| 2003 | 8    | 5   | 16  | 5   | 2  | 6  | 21  | 8   | 7  | 31  | 11  |
| 2004 | 3    | 2   | 4   | 3   | 1  | 1  | 3   | 1   | 1  | 6   | 3   |
| 2005 | 22   | 19  | 6   | 24  | 8  | 7  | 12  | 9   | 7  | 35  | 22  |
| 2006 | 78   | 21  | 25  | 68  | 14 | 27 | 53  | 21  | 10 | 61  | 46  |
| 2007 | 26   | 4   | 19  | 29  | 9  | 8  | 26  | 13  | 13 | 15  | 11  |
| 2008 | 15   | 5   | 5   | 8   | 1  | 5  | 30  | 21  | 25 | 23  | 10  |
| 2009 | 3    | 2   | 2   | 3   | 2  | 4  | 2   | 0   | 1  | 3   | 1   |
| 2010 | 34   | 21  | 6   | 17  | 12 | 16 | 14  | 7   | 3  | 19  | 7   |
| 2011 | 36   | 8   | 12  | 35  | 6  | 17 | 24  | 19  | 12 | 49  | 35  |
| 2012 | 39   | 5   | 5   | 22  | 3  | 12 | 26  | 17  | 13 | 33  | 28  |
| 2013 | 17   | 7   | 4   | 10  | 2  | 4  | 46  | 26  | 16 | 26  | 12  |
| 2101 | 283  | 186 | 166 | 28  | 15 | 22 | 116 | 21  | 12 | 206 | 27  |
| 2102 | 38   | 20  | 10  | 11  | 7  | 24 | 18  | 10  | 11 | 19  | 15  |
| 2103 | 40   | 8   | 9   | 32  | 6  | 9  | 23  | 5   | 18 | 39  | 26  |
| 2104 | 58   | 19  | 16  | 22  | 8  | 5  | 31  | 15  | 8  | 55  | 34  |
| 2105 | 2284 | 861 | 147 | 925 | 60 | 32 | 514 | 202 | 78 | 160 | 63  |
| 2106 | 3    | 2   | 1   | 3   | 1  | 0  | 3   | 1   | 0  | 3   | 1   |
| 2107 | 42   | 29  | 15  | 11  | 6  | 35 | 18  | 12  | 12 | 33  | 19  |
| 2201 | 51   | 11  | 4   | 24  | 3  | 4  | 19  | 2   | 1  | 38  | 7   |
| 2202 | 43   | 6   | 12  | 22  | 8  | 20 | 23  | 7   | 11 | 34  | 20  |
| 2203 | 10   | 7   | 4   | 12  | 7  | 5  | 23  | 12  | 46 | 17  | 6   |
| 2204 | 2    | 1   | 2   | 2   | 1  | 0  | 2   | 0   | 1  | 3   | 2   |
| 2205 | 240  | 51  | 38  | 29  | 9  | 33 | 43  | 11  | 39 | 144 | 78  |
| 2206 | 42   | 13  | 28  | 19  | 3  | 25 | 29  | 13  | 16 | 63  | 32  |
| 2207 | 58   | 15  | 4   | 16  | 3  | 5  | 62  | 26  | 9  | 99  | 26  |
| 2208 | 15   | 10  | 6   | 6   | 2  | 2  | 30  | 12  | 32 | 19  | 5   |
| 2209 | 5    | 2   | 3   | 2   | 1  | 0  | 3   | 1   | 1  | 3   | 1   |
| 2210 | 37   | 10  | 21  | 21  | 9  | 12 | 18  | 8   | 3  | 41  | 18  |
| 2211 | 42   | 11  | 15  | 16  | 1  | 7  | 29  | 8   | 2  | 51  | 17  |
| 2212 | 41   | 6   | 6   | 10  | 3  | 3  | 42  | 3   | 10 | 49  | 6   |
| 3001 | 42   | 18  | 16  | 12  | 4  | 17 | 11  | 4   | 4  | 56  | 35  |
| 3301 | 51   | 5   | 8   | 18  | 6  | 3  | 45  | 16  | 21 | 100 | 58  |
| 3302 | 36   | 4   | 1   | 21  | 9  | 4  | 31  | 4   | 10 | 39  | 11  |
| 3401 | 7    | 2   | 0   | 5   | 3  | 2  | 31  | 15  | 54 | 34  | 20  |

|      |    |    |    |    |    |    |    |    |    |    |    |
|------|----|----|----|----|----|----|----|----|----|----|----|
| 9001 | 3  | 1  | 1  | 2  | 0  | 0  | 4  | 2  | 1  | 3  | 1  |
| 9002 | 21 | 16 | 25 | 62 | 28 | 23 | 7  | 3  | 3  | 19 | 11 |
| 9003 | 49 | 20 | 10 | 29 | 5  | 10 | 22 | 15 | 18 | 29 | 19 |

Supplementary Table 3.7 represents all fluorescent signals (0-65535 RFU, relative fluorescent units) for groups of mice transferred to normal diet (standard granulated food)

| Mouse ID | 7.1    |        |        | 7.2    |        |        | 7.3    |        |        | 7.4    |        |  |
|----------|--------|--------|--------|--------|--------|--------|--------|--------|--------|--------|--------|--|
| Nr       | Median | -1st Q | +3rd Q | Median | -1st Q | +3rd Q | Median | -1st Q | +3rd Q | Median | -1st Q |  |
| 001      | 98     | 11     | 4141   | 82     | 14     | 3589   | 30     | 27     | 6      | 38     | 25     |  |
| 002      | 298    | 113    | 2910   | 353    | 123    | 3494   | 85     | 39     | 57     | 86     | 55     |  |
| 003      | 259    | 164    | 4327   | 212    | 122    | 2912   | 99     | 67     | 161    | 87     | 60     |  |
| 004      | 29     | 10     | 3315   | 77     | 27     | 2517   | 6      | 4      | 9      | 94     | 12     |  |
| 005      | 16     | 3      | 4      | 21     | 12     | 3      | 9      | 5      | 9      | 12     | 8      |  |
| 006      | 58     | 6      | 18     | 54     | 28     | 7      | 34     | 32     | 3      | 18     | 17     |  |
| 007      | 104    | 59     | 85     | 54     | 7      | 29     | 34     | 21     | 10     | 23     | 13     |  |
| 009      | 35     | 2      | 18     | 53     | 20     | 13     | 6      | 4      | 3      | 46     | 11     |  |
| 010      | 36     | 26     | 25     | 25     | 20     | 16     | 10     | 3      | 2      | 13     | 8      |  |
| 011      | 51     | 12     | 14     | 37     | 11     | 12     | 28     | 13     | 67     | 16     | 12     |  |
| 012      | 123    | 89     | 22     | 59     | 16     | 66     | 36     | 19     | 11     | 23     | 6      |  |
| 013      | 75     | 53     | 56     | 65     | 37     | 84     | 21     | 16     | 36     | 34     | 17     |  |
| 014      | 8      | 2      | 2      | 25     | 12     | 14     | 5      | 3      | 3      | 26     | 4      |  |
| 015      | 10     | 3      | 5      | 5      | 3      | 1      | 11     | 6      | 7      | 8      | 3      |  |
| 016      | 45     | 10     | 33     | 43     | 10     | 39     | 34     | 28     | 8      | 19     | 3      |  |
| 017      | 40     | 12     | 30     | 35     | 10     | 35     | 25     | 10     | 10     | 22     | 7      |  |
| 018      | 26     | 9      | 0      | 32     | 3      | 45     | 25     | 7      | 41     | 33     | 9      |  |
| 019      | 12     | 6      | 2      | 36     | 4      | 5      | 4      | 2      | 3      | 15     | 3      |  |
| 020      | 209    | 71     | 50     | 20     | 9      | 7      | 13     | 4      | 2      | 33     | 22     |  |
| 021      | 50     | 16     | 9      | 27     | 4      | 22     | 23     | 8      | 35     | 20     | 5      |  |
| 022      | 57     | 28     | 43     | 38     | 7      | 44     | 14     | 9      | 5      | 15     | 3      |  |
| 023      | 39     | 8      | 7      | 38     | 16     | 48     | 26     | 15     | 28     | 32     | 15     |  |
| 024      | 50     | 23     | 14     | 58     | 16     | 28     | 3      | 1      | 4      | 26     | 8      |  |
| 025      | 12     | 4      | 6      | 9      | 5      | 3      | 7      | 3      | 8      | 7      | 2      |  |
| 026      | 36     | 14     | 6      | 25     | 11     | 13     | 15     | 4      | 18     | 26     | 4      |  |
| 027      | 24     | 3      | 19     | 25     | 10     | 5      | 16     | 7      | 3      | 16     | 2      |  |
| 037      | 80     | 41     | 80     | 93     | 31     | 84     | 29     | 16     | 38     | 31     | 6      |  |
| 038      | 21     | 4      | 2      | 54     | 13     | 9      | 4      | 2      | 2      | 22     | 7      |  |
| 043      | 25     | 11     | 7      | 28     | 21     | 15     | 28     | 6      | 5      | 21     | 3      |  |
| 044      | 22     | 2      | 5      | 18     | 4      | 4      | 20     | 3      | 1      | 15     | 3      |  |
| 045      | 37     | 24     | 129    | 118    | 87     | 283    | 106    | 76     | 33     | 25     | 5      |  |
| 046      | 12     | 5      | 10     | 18     | 3      | 8      | 6      | 3      | 2      | 17     | 5      |  |
| 047      | 45     | 16     | 3      | 35     | 4      | 5      | 39     | 24     | 1      | 27     | 17     |  |
| 048      | 37     | 21     | 10     | 47     | 35     | 14     | 27     | 12     | 36     | 22     | 18     |  |
| 049      | 42     | 13     | 5      | 43     | 19     | 1646   | 17     | 9      | 5      | 17     | 10     |  |
| 050      | 85     | 16     | 1832   | 146    | 100    | 1168   | 12     | 8      | 26     | 24     | 9      |  |
| 051      | 14     | 2      | 3      | 23     | 11     | 3      | 4      | 3      | 2      | 14     | 3      |  |
| 052      | 13     | 5      | 6      | 12     | 6      | 3      | 9      | 4      | 2      | 12     | 9      |  |
| 053      | 15     | 3      | 11     | 21     | 5      | 4      | 19     | 15     | 2      | 8      | 7      |  |
| 054      | 38     | 7      | 6      | 42     | 7      | 5      | 18     | 13     | 2      | 18     | 6      |  |
| 055      | 23     | 1      | 82     | 24     | 6      | 69     | 7      | 4      | 15     | 19     | 5      |  |
| 071      | 32     | 10     | 7      | 72     | 9      | 8      | 2      | 1      | 1      | 23     | 4      |  |

|     |     |    |     |     |    |     |     |     |    |    |    |
|-----|-----|----|-----|-----|----|-----|-----|-----|----|----|----|
| 072 | 23  | 12 | 23  | 93  | 54 | 14  | 14  | 6   | 2  | 10 | 7  |
| 073 | 17  | 2  | 10  | 25  | 16 | 8   | 13  | 11  | 6  | 16 | 11 |
| 074 | 40  | 19 | 50  | 59  | 33 | 18  | 17  | 8   | 4  | 18 | 7  |
| 075 | 57  | 27 | 91  | 62  | 24 | 98  | 9   | 5   | 39 | 36 | 14 |
| 076 | 23  | 5  | 12  | 55  | 11 | 21  | 3   | 1   | 3  | 18 | 4  |
| 077 | 122 | 34 | 11  | 96  | 32 | 10  | 35  | 12  | 28 | 25 | 21 |
| 078 | 41  | 14 | 31  | 45  | 19 | 19  | 15  | 9   | 13 | 18 | 8  |
| 080 | 110 | 41 | 26  | 199 | 83 | 30  | 7   | 3   | 36 | 31 | 10 |
| 081 | 29  | 11 | 16  | 60  | 18 | 11  | 3   | 2   | 1  | 18 | 7  |
| 082 | 6   | 1  | 3   | 4   | 1  | 0   | 17  | 7   | 4  | 11 | 1  |
| 083 | 23  | 9  | 3   | 14  | 3  | 6   | 17  | 14  | 2  | 11 | 2  |
| 084 | 36  | 7  | 16  | 35  | 8  | 3   | 11  | 7   | 5  | 21 | 2  |
| 085 | 44  | 9  | 21  | 92  | 42 | 23  | 15  | 6   | 25 | 18 | 3  |
| 086 | 35  | 14 | 18  | 83  | 27 | 32  | 3   | 2   | 1  | 20 | 10 |
| 087 | 14  | 6  | 17  | 3   | 0  | 1   | 10  | 3   | 16 | 12 | 5  |
| 088 | 48  | 35 | 43  | 71  | 46 | 39  | 22  | 2   | 2  | 23 | 5  |
| 089 | 49  | 10 | 33  | 78  | 18 | 37  | 13  | 4   | 4  | 19 | 8  |
| 092 | 33  | 12 | 67  | 51  | 13 | 123 | 2   | 0   | 1  | 22 | 5  |
| 093 | 11  | 6  | 1   | 4   | 2  | 2   | 10  | 7   | 9  | 11 | 2  |
| 094 | 25  | 12 | 5   | 15  | 2  | 1   | 13  | 1   | 7  | 11 | 2  |
| 096 | 75  | 19 | 86  | 111 | 51 | 23  | 15  | 6   | 10 | 14 | 4  |
| 097 | 68  | 18 | 29  | 101 | 33 | 41  | 5   | 2   | 3  | 24 | 1  |
| 098 | 11  | 6  | 346 | 9   | 5  | 357 | 14  | 6   | 9  | 11 | 2  |
| 099 | 13  | 3  | 10  | 26  | 16 | 739 | 18  | 9   | 10 | 14 | 6  |
| 100 | 25  | 9  | 17  | 38  | 12 | 531 | 10  | 4   | 4  | 14 | 9  |
| 101 | 85  | 16 | 916 | 71  | 35 | 544 | 316 | 311 | 31 | 23 | 9  |
| 102 | 65  | 30 | 61  | 107 | 38 | 229 | 7   | 4   | 7  | 18 | 2  |
| 103 | 8   | 2  | 3   | 3   | 0  | 2   | 13  | 9   | 7  | 13 | 8  |
| 104 | 51  | 36 | 4   | 76  | 63 | 3   | 26  | 14  | 11 | 19 | 7  |
| 105 | 74  | 15 | 8   | 98  | 7  | 7   | 15  | 6   | 6  | 17 | 6  |
| 106 | 59  | 29 | 645 | 70  | 25 | 9   | 14  | 11  | 23 | 60 | 11 |
| 107 | 31  | 2  | 9   | 94  | 13 | 10  | 4   | 3   | 4  | 54 | 19 |
| 110 | 87  | 64 | 17  | 71  | 39 | 22  | 35  | 31  | 5  | 16 | 8  |
| 111 | 31  | 9  | 17  | 36  | 16 | 14  | 13  | 7   | 4  | 17 | 5  |
| 112 | 41  | 18 | 31  | 32  | 9  | 33  | 8   | 5   | 7  | 29 | 10 |
| 113 | 40  | 17 | 9   | 82  | 29 | 34  | 4   | 2   | 2  | 15 | 4  |
| 114 | 5   | 1  | 1   | 5   | 1  | 0   | 12  | 4   | 8  | 9  | 5  |
| 115 | 21  | 6  | 2   | 10  | 4  | 8   | 19  | 12  | 8  | 15 | 5  |
| 116 | 23  | 6  | 15  | 22  | 10 | 11  | 17  | 12  | 1  | 13 | 2  |
| 117 | 18  | 6  | 54  | 27  | 6  | 29  | 9   | 1   | 3  | 15 | 5  |
| 118 | 13  | 1  | 9   | 40  | 6  | 12  | 6   | 4   | 1  | 14 | 5  |
| 119 | 7   | 2  | 2   | 4   | 1  | 1   | 11  | 4   | 3  | 11 | 4  |
| 120 | 25  | 6  | 8   | 15  | 7  | 8   | 19  | 9   | 5  | 13 | 4  |
| 121 | 23  | 10 | 9   | 29  | 13 | 16  | 14  | 10  | 6  | 15 | 3  |
| 122 | 15  | 2  | 1   | 14  | 4  | 3   | 9   | 3   | 4  | 16 | 5  |
| 123 | 11  | 5  | 3   | 24  | 2  | 7   | 3   | 2   | 1  | 13 | 4  |
| 125 | 69  | 10 | 4   | 104 | 54 | 50  | 167 | 82  | 53 | 72 | 15 |
| 126 | 41  | 9  | 28  | 31  | 2  | 29  | 24  | 10  | 9  | 21 | 3  |
| 127 | 72  | 22 | 28  | 62  | 14 | 50  | 26  | 16  | 26 | 32 | 3  |
| 128 | 33  | 7  | 5   | 68  | 5  | 7   | 7   | 3   | 4  | 32 | 6  |

|     |     |     |     |     |    |     |     |     |     |      |     |
|-----|-----|-----|-----|-----|----|-----|-----|-----|-----|------|-----|
| 129 | 16  | 10  | 15  | 15  | 12 | 16  | 17  | 7   | 8   | 14   | 6   |
| 130 | 27  | 14  | 5   | 21  | 5  | 16  | 37  | 5   | 5   | 31   | 9   |
| 131 | 65  | 6   | 10  | 70  | 29 | 8   | 77  | 17  | 10  | 82   | 5   |
| 132 | 30  | 6   | 24  | 32  | 12 | 31  | 13  | 2   | 3   | 14   | 6   |
| 133 | 19  | 10  | 6   | 45  | 9  | 4   | 3   | 0   | 3   | 28   | 10  |
| 134 | 6   | 1   | 5   | 7   | 4  | 18  | 27  | 19  | 10  | 14   | 8   |
| 135 | 27  | 11  | 279 | 22  | 11 | 5   | 19  | 14  | 12  | 15   | 9   |
| 136 | 54  | 18  | 21  | 73  | 25 | 4   | 22  | 13  | 7   | 21   | 8   |
| 137 | 60  | 10  | 396 | 75  | 16 | 247 | 11  | 9   | 5   | 27   | 6   |
| 138 | 20  | 3   | 294 | 40  | 2  | 9   | 5   | 3   | 0   | 20   | 4   |
| 139 | 4   | 1   | 4   | 4   | 1  | 8   | 13  | 8   | 5   | 12   | 7   |
| 140 | 153 | 119 | 33  | 160 | 91 | 57  | 83  | 69  | 106 | 71   | 38  |
| 142 | 45  | 12  | 10  | 73  | 45 | 2   | 132 | 122 | 38  | 26   | 6   |
| 143 | 15  | 1   | 6   | 48  | 13 | 7   | 5   | 3   | 3   | 21   | 6   |
| 144 | 5   | 3   | 23  | 6   | 3  | 19  | 14  | 6   | 5   | 11   | 7   |
| 145 | 36  | 20  | 12  | 38  | 16 | 15  | 21  | 12  | 4   | 13   | 6   |
| 146 | 42  | 12  | 23  | 57  | 8  | 25  | 11  | 8   | 14  | 26   | 9   |
| 149 | 8   | 4   | 8   | 8   | 3  | 13  | 26  | 3   | 3   | 20   | 11  |
| 150 | 56  | 23  | 27  | 258 | 96 | 30  | 69  | 58  | 24  | 19   | 9   |
| 151 | 33  | 13  | 10  | 51  | 14 | 22  | 12  | 8   | 4   | 15   | 2   |
| 152 | 40  | 27  | 24  | 44  | 18 | 26  | 7   | 2   | 5   | 17   | 3   |
| 153 | 32  | 15  | 3   | 68  | 15 | 8   | 2   | 1   | 5   | 21   | 8   |
| 154 | 7   | 1   | 12  | 28  | 24 | 26  | 42  | 14  | 15  | 13   | 6   |
| 156 | 54  | 13  | 7   | 53  | 15 | 9   | 16  | 8   | 7   | 69   | 20  |
| 158 | 25  | 7   | 9   | 88  | 33 | 12  | 6   | 5   | 4   | 22   | 6   |
| 159 | 14  | 8   | 11  | 8   | 3  | 9   | 15  | 3   | 11  | 16   | 6   |
| 160 | 34  | 24  | 12  | 38  | 15 | 2   | 17  | 3   | 9   | 18   | 4   |
| 161 | 37  | 17  | 11  | 44  | 5  | 20  | 9   | 3   | 8   | 16   | 3   |
| 162 | 101 | 46  | 28  | 133 | 43 | 46  | 15  | 6   | 35  | 32   | 8   |
| 164 | 18  | 9   | 17  | 6   | 2  | 2   | 17  | 7   | 12  | 16   | 9   |
| 165 | 32  | 24  | 19  | 25  | 12 | 4   | 15  | 2   | 3   | 17   | 4   |
| 166 | 219 | 103 | 79  | 36  | 10 | 11  | 393 | 104 | 72  | 60   | 20  |
| 167 | 25  | 7   | 12  | 62  | 37 | 17  | 8   | 1   | 6   | 16   | 4   |
| 168 | 28  | 1   | 10  | 50  | 5  | 19  | 4   | 2   | 4   | 25   | 7   |
| 169 | 9   | 3   | 36  | 12  | 7  | 50  | 16  | 3   | 15  | 9    | 2   |
| 170 | 46  | 7   | 13  | 40  | 2  | 19  | 26  | 17  | 8   | 21   | 12  |
| 171 | 28  | 7   | 113 | 30  | 9  | 79  | 10  | 7   | 4   | 12   | 7   |
| 173 | 88  | 52  | 102 | 67  | 17 | 68  | 17  | 12  | 9   | 15   | 4   |
| 174 | 46  | 5   | 1   | 115 | 40 | 1   | 3   | 2   | 2   | 21   | 6   |
| 175 | 8   | 4   | 10  | 4   | 1  | 8   | 17  | 8   | 7   | 17   | 14  |
| 176 | 46  | 16  | 47  | 168 | 37 | 22  | 20  | 11  | 13  | 24   | 12  |
| 177 | 179 | 15  | 19  | 382 | 18 | 86  | 251 | 170 | 36  | 849  | 175 |
| 178 | 62  | 13  | 81  | 122 | 53 | 29  | 26  | 21  | 37  | 30   | 9   |
| 179 | 12  | 2   | 5   | 40  | 9  | 15  | 3   | 1   | 3   | 17   | 3   |
| 180 | 28  | 21  | 29  | 18  | 14 | 19  | 30  | 16  | 11  | 19   | 9   |
| 181 | 643 | 176 | 167 | 590 | 88 | 48  | 364 | 131 | 75  | 2702 | 920 |
| 182 | 39  | 13  | 11  | 56  | 26 | 6   | 12  | 5   | 9   | 15   | 5   |
| 183 | 161 | 14  | 47  | 134 | 11 | 23  | 15  | 11  | 33  | 28   | 8   |
| 184 | 55  | 5   | 5   | 113 | 12 | 6   | 3   | 1   | 1   | 20   | 8   |
| 186 | 46  | 21  | 6   | 40  | 11 | 4   | 21  | 13  | 8   | 14   | 5   |

|     |     |     |     |     |    |     |      |      |     |      |      |
|-----|-----|-----|-----|-----|----|-----|------|------|-----|------|------|
| 187 | 33  | 10  | 6   | 32  | 10 | 10  | 14   | 6    | 1   | 13   | 4    |
| 188 | 23  | 5   | 36  | 18  | 2  | 3   | 8    | 4    | 12  | 13   | 2    |
| 189 | 29  | 16  | 12  | 84  | 19 | 22  | 3    | 2    | 7   | 27   | 8    |
| 190 | 13  | 7   | 27  | 6   | 4  | 14  | 26   | 8    | 17  | 17   | 4    |
| 191 | 43  | 1   | 9   | 50  | 24 | 6   | 29   | 17   | 2   | 18   | 5    |
| 192 | 37  | 14  | 4   | 49  | 14 | 30  | 52   | 17   | 6   | 620  | 31   |
| 193 | 52  | 3   | 11  | 34  | 2  | 12  | 249  | 165  | 192 | 3869 | 1915 |
| 194 | 37  | 13  | 54  | 49  | 8  | 31  | 3    | 2    | 8   | 108  | 39   |
| 195 | 11  | 1   | 4   | 6   | 1  | 2   | 17   | 2    | 1   | 18   | 3    |
| 196 | 24  | 7   | 5   | 20  | 7  | 4   | 22   | 8    | 9   | 17   | 3    |
| 197 | 615 | 108 | 37  | 30  | 6  | 13  | 1957 | 1069 | 668 | 6190 | 2013 |
| 198 | 216 | 80  | 23  | 118 | 29 | 23  | 13   | 6    | 10  | 25   | 7    |
| 199 | 11  | 3   | 4   | 23  | 3  | 12  | 5    | 3    | 3   | 13   | 4    |
| 200 | 9   | 3   | 5   | 8   | 2  | 0   | 15   | 6    | 9   | 15   | 4    |
| 201 | 332 | 60  | 45  | 27  | 18 | 4   | 65   | 32   | 17  | 984  | 67   |
| 202 | 185 | 29  | 4   | 57  | 16 | 26  | 235  | 79   | 22  | 969  | 83   |
| 203 | 28  | 4   | 16  | 72  | 12 | 43  | 18   | 4    | 18  | 15   | 4    |
| 204 | 12  | 5   | 5   | 28  | 12 | 14  | 5    | 3    | 1   | 18   | 8    |
| 205 | 33  | 15  | 8   | 25  | 12 | 20  | 16   | 7    | 11  | 13   | 6    |
| 206 | 45  | 10  | 57  | 48  | 16 | 10  | 32   | 17   | 19  | 17   | 4    |
| 207 | 59  | 11  | 48  | 66  | 14 | 19  | 14   | 7    | 9   | 13   | 6    |
| 215 | 105 | 50  | 53  | 100 | 23 | 51  | 10   | 6    | 37  | 18   | 5    |
| 216 | 72  | 7   | 2   | 216 | 37 | 14  | 3    | 2    | 2   | 31   | 14   |
| 217 | 27  | 21  | 70  | 40  | 36 | 46  | 20   | 10   | 12  | 19   | 12   |
| 219 | 34  | 11  | 36  | 30  | 8  | 13  | 21   | 9    | 5   | 26   | 19   |
| 220 | 112 | 47  | 141 | 112 | 33 | 151 | 15   | 4    | 9   | 20   | 8    |
| 221 | 38  | 16  | 28  | 24  | 1  | 3   | 12   | 6    | 24  | 32   | 12   |
| 222 | 64  | 7   | 4   | 130 | 5  | 13  | 7    | 5    | 1   | 20   | 6    |
| 223 | 8   | 4   | 1   | 6   | 4  | 3   | 19   | 6    | 5   | 19   | 9    |
| 225 | 93  | 60  | 16  | 94  | 51 | 23  | 28   | 16   | 7   | 20   | 11   |
| 226 | 45  | 15  | 26  | 46  | 10 | 34  | 16   | 6    | 27  | 38   | 7    |
| 227 | 41  | 11  | 26  | 75  | 19 | 20  | 6    | 4    | 6   | 77   | 35   |
| 228 | 23  | 14  | 48  | 25  | 22 | 52  | 31   | 5    | 6   | 16   | 3    |
| 229 | 18  | 4   | 4   | 16  | 6  | 2   | 17   | 8    | 12  | 14   | 6    |
| 231 | 46  | 29  | 19  | 54  | 26 | 24  | 15   | 7    | 4   | 14   | 2    |
| 232 | 37  | 16  | 10  | 51  | 12 | 18  | 9    | 7    | 8   | 12   | 3    |
| 233 | 67  | 5   | 23  | 156 | 13 | 29  | 5    | 4    | 4   | 34   | 12   |
| 234 | 93  | 27  | 9   | 77  | 54 | 12  | 29   | 6    | 10  | 21   | 4    |
| 235 | 109 | 16  | 11  | 57  | 22 | 27  | 432  | 336  | 40  | 11   | 2    |
| 236 | 45  | 19  | 22  | 24  | 6  | 12  | 246  | 76   | 42  | 20   | 5    |
| 237 | 35  | 18  | 39  | 32  | 6  | 34  | 18   | 10   | 21  | 26   | 13   |
| 239 | 33  | 16  | 29  | 56  | 50 | 13  | 22   | 2    | 10  | 20   | 6    |
| 240 | 21  | 8   | 17  | 19  | 6  | 7   | 279  | 233  | 43  | 25   | 14   |
| 241 | 25  | 12  | 20  | 18  | 4  | 13  | 13   | 5    | 6   | 18   | 2    |
| 242 | 28  | 10  | 28  | 30  | 6  | 1   | 10   | 4    | 19  | 19   | 11   |
| 243 | 28  | 17  | 8   | 43  | 12 | 30  | 3    | 1    | 3   | 13   | 2    |
| 245 | 32  | 5   | 9   | 45  | 21 | 8   | 18   | 7    | 12  | 23   | 11   |
| 246 | 58  | 17  | 29  | 70  | 13 | 13  | 18   | 3    | 9   | 16   | 5    |
| 247 | 24  | 13  | 8   | 29  | 6  | 13  | 15   | 1    | 3   | 14   | 3    |
| 248 | 88  | 29  | 34  | 131 | 51 | 17  | 9    | 5    | 1   | 35   | 17   |

|     |      |     |     |     |     |     |    |    |    |      |     |
|-----|------|-----|-----|-----|-----|-----|----|----|----|------|-----|
| 249 | 22   | 8   | 16  | 82  | 21  | 15  | 11 | 8  | 5  | 19   | 5   |
| 250 | 19   | 12  | 6   | 10  | 6   | 5   | 42 | 27 | 14 | 11   | 2   |
| 251 | 61   | 9   | 50  | 734 | 197 | 31  | 40 | 21 | 17 | 24   | 14  |
| 252 | 20   | 10  | 3   | 25  | 6   | 15  | 13 | 7  | 3  | 13   | 9   |
| 253 | 134  | 32  | 17  | 140 | 16  | 22  | 8  | 7  | 2  | 21   | 11  |
| 254 | 42   | 23  | 20  | 81  | 34  | 27  | 3  | 2  | 3  | 12   | 1   |
| 255 | 36   | 9   | 17  | 37  | 21  | 11  | 25 | 16 | 6  | 20   | 15  |
| 256 | 1283 | 450 | 103 | 70  | 34  | 29  | 17 | 6  | 6  | 1096 | 371 |
| 258 | 25   | 8   | 6   | 24  | 9   | 20  | 15 | 10 | 8  | 13   | 4   |
| 259 | 75   | 13  | 52  | 123 | 17  | 50  | 14 | 10 | 15 | 20   | 1   |
| 260 | 43   | 5   | 16  | 613 | 57  | 165 | 5  | 3  | 5  | 21   | 5   |
| 261 | 37   | 27  | 15  | 51  | 32  | 16  | 26 | 12 | 10 | 17   | 11  |
| 262 | 24   | 11  | 2   | 16  | 8   | 3   | 16 | 9  | 4  | 13   | 4   |
| 263 | 18   | 3   | 5   | 33  | 13  | 24  | 13 | 7  | 8  | 11   | 5   |
| 264 | 65   | 15  | 35  | 86  | 22  | 46  | 9  | 7  | 18 | 75   | 22  |
| 266 | 40   | 17  | 22  | 41  | 29  | 19  | 30 | 4  | 6  | 12   | 7   |
| 267 | 105  | 38  | 19  | 60  | 50  | 34  | 69 | 46 | 57 | 74   | 41  |
| 268 | 37   | 18  | 11  | 25  | 8   | 29  | 26 | 14 | 17 | 23   | 7   |
| 287 | 35   | 6   | 8   | 85  | 49  | 41  | 9  | 6  | 19 | 16   | 6   |
| 288 | 20   | 3   | 7   | 43  | 4   | 24  | 2  | 1  | 3  | 16   | 5   |
| 289 | 23   | 16  | 30  | 8   | 4   | 23  | 25 | 3  | 2  | 24   | 13  |
| 290 | 26   | 5   | 6   | 22  | 4   | 7   | 19 | 9  | 13 | 12   | 3   |
| 291 | 36   | 21  | 26  | 23  | 5   | 13  | 16 | 7  | 7  | 14   | 3   |
| 292 | 27   | 7   | 8   | 30  | 6   | 23  | 9  | 7  | 5  | 28   | 15  |
| 293 | 19   | 5   | 12  | 45  | 10  | 5   | 1  | 0  | 1  | 8    | 3   |
| 294 | 9    | 2   | 10  | 10  | 6   | 6   | 22 | 1  | 2  | 30   | 16  |
| 295 | 50   | 6   | 30  | 51  | 8   | 24  | 24 | 3  | 5  | 21   | 6   |
| 296 | 18   | 7   | 24  | 25  | 10  | 13  | 15 | 1  | 3  | 30   | 19  |
| 297 | 60   | 35  | 23  | 73  | 46  | 30  | 11 | 8  | 5  | 17   | 5   |
| 298 | 26   | 9   | 6   | 46  | 9   | 14  | 5  | 3  | 2  | 16   | 6   |
| 299 | 19   | 11  | 30  | 26  | 21  | 29  | 18 | 5  | 8  | 13   | 2   |
| 300 | 57   | 15  | 29  | 89  | 19  | 22  | 21 | 4  | 5  | 19   | 6   |
| 302 | 71   | 24  | 8   | 71  | 11  | 24  | 14 | 9  | 17 | 14   | 5   |
| 303 | 47   | 39  | 46  | 38  | 14  | 87  | 6  | 3  | 0  | 17   | 2   |
| 304 | 25   | 19  | 29  | 10  | 6   | 26  | 31 | 21 | 5  | 13   | 4   |
| 305 | 52   | 10  | 7   | 38  | 12  | 17  | 17 | 6  | 25 | 26   | 18  |
| 306 | 27   | 14  | 15  | 30  | 14  | 6   | 11 | 9  | 7  | 11   | 5   |
| 307 | 30   | 7   | 11  | 34  | 9   | 11  | 12 | 9  | 9  | 16   | 7   |
| 308 | 39   | 11  | 13  | 75  | 14  | 23  | 2  | 1  | 0  | 22   | 9   |
| 309 | 11   | 6   | 9   | 8   | 3   | 4   | 20 | 7  | 2  | 14   | 9   |
| 310 | 29   | 10  | 2   | 24  | 10  | 4   | 18 | 10 | 6  | 12   | 5   |
| 315 | 35   | 2   | 5   | 82  | 11  | 14  | 4  | 2  | 3  | 37   | 12  |
| 318 | 49   | 15  | 11  | 56  | 7   | 17  | 47 | 27 | 5  | 30   | 18  |
| 319 | 62   | 48  | 19  | 37  | 14  | 8   | 35 | 15 | 8  | 23   | 6   |
| 320 | 97   | 5   | 7   | 88  | 11  | 14  | 45 | 22 | 21 | 35   | 13  |
| 321 | 18   | 3   | 7   | 46  | 9   | 9   | 2  | 1  | 1  | 15   | 4   |
| 322 | 10   | 3   | 9   | 9   | 1   | 9   | 23 | 7  | 5  | 19   | 9   |
| 323 | 55   | 10  | 16  | 59  | 16  | 12  | 17 | 11 | 5  | 13   | 4   |
| 324 | 28   | 13  | 28  | 59  | 29  | 12  | 16 | 5  | 4  | 20   | 8   |
| 325 | 34   | 1   | 4   | 40  | 4   | 9   | 17 | 11 | 22 | 27   | 9   |



|     |     |    |    |      |    |    |     |     |     |     |     |
|-----|-----|----|----|------|----|----|-----|-----|-----|-----|-----|
| 326 | 10  | 4  | 5  | 49   | 10 | 7  | 3   | 2   | 4   | 20  | 10  |
| 327 | 15  | 8  | 7  | 10   | 4  | 1  | 24  | 4   | 3   | 19  | 4   |
| 328 | 47  | 4  | 17 | 43   | 6  | 7  | 39  | 21  | 3   | 27  | 5   |
| 329 | 66  | 24 | 15 | 81   | 9  | 13 | 35  | 12  | 9   | 55  | 7   |
| 330 | 34  | 9  | 17 | 46   | 7  | 21 | 14  | 10  | 9   | 24  | 8   |
| 331 | 41  | 17 | 4  | 80   | 16 | 26 | 5   | 3   | 4   | 19  | 9   |
| 332 | 10  | 4  | 17 | 12   | 6  | 7  | 27  | 6   | 5   | 20  | 0   |
| 333 | 60  | 7  | 11 | 34   | 4  | 9  | 22  | 2   | 11  | 27  | 9   |
| 334 | 41  | 14 | 7  | 47   | 10 | 19 | 22  | 5   | 10  | 24  | 5   |
| 335 | 36  | 9  | 19 | 26   | 6  | 8  | 18  | 9   | 7   | 19  | 4   |
| 359 | 21  | 2  | 9  | 72   | 13 | 11 | 4   | 3   | 3   | 19  | 6   |
| 360 | 15  | 6  | 25 | 16   | 12 | 14 | 24  | 4   | 14  | 47  | 22  |
| 361 | 148 | 11 | 8  | 72   | 8  | 9  | 42  | 12  | 9   | 148 | 10  |
| 362 | 99  | 56 | 16 | 191  | 11 | 22 | 191 | 7   | 11  | 255 | 14  |
| 363 | 54  | 12 | 42 | 87   | 40 | 16 | 149 | 59  | 9   | 101 | 24  |
| 364 | 855 | 70 | 55 | 1337 | 31 | 69 | 248 | 188 | 57  | 948 | 52  |
| 365 | 154 | 71 | 16 | 37   | 26 | 19 | 158 | 47  | 18  | 19  | 6   |
| 366 | 32  | 12 | 13 | 35   | 8  | 6  | 19  | 7   | 10  | 15  | 9   |
| 368 | 61  | 11 | 20 | 56   | 13 | 29 | 11  | 8   | 4   | 134 | 94  |
| 369 | 95  | 39 | 9  | 49   | 15 | 26 | 3   | 2   | 4   | 35  | 13  |
| 371 | 45  | 19 | 6  | 35   | 24 | 8  | 18  | 9   | 9   | 16  | 10  |
| 372 | 176 | 8  | 13 | 378  | 53 | 15 | 86  | 77  | 9   | 129 | 88  |
| 373 | 34  | 5  | 18 | 47   | 12 | 19 | 15  | 8   | 4   | 16  | 6   |
| 374 | 42  | 6  | 31 | 48   | 15 | 38 | 7   | 5   | 3   | 26  | 10  |
| 375 | 19  | 4  | 5  | 47   | 15 | 12 | 3   | 1   | 0   | 17  | 9   |
| 376 | 15  | 4  | 3  | 10   | 4  | 0  | 18  | 6   | 2   | 17  | 8   |
| 377 | 17  | 5  | 3  | 16   | 2  | 1  | 18  | 7   | 4   | 14  | 5   |
| 378 | 47  | 15 | 9  | 52   | 19 | 25 | 11  | 3   | 5   | 19  | 5   |
| 379 | 21  | 7  | 2  | 16   | 2  | 3  | 13  | 11  | 6   | 14  | 6   |
| 380 | 21  | 13 | 5  | 60   | 22 | 12 | 2   | 1   | 2   | 20  | 10  |
| 381 | 64  | 36 | 16 | 77   | 26 | 12 | 532 | 305 | 151 | 18  | 9   |
| 382 | 32  | 10 | 6  | 24   | 7  | 5  | 11  | 6   | 6   | 15  | 3   |
| 383 | 34  | 5  | 5  | 36   | 5  | 19 | 13  | 8   | 5   | 23  | 7   |
| 384 | 84  | 14 | 17 | 51   | 13 | 4  | 8   | 7   | 4   | 17  | 6   |
| 386 | 65  | 40 | 20 | 63   | 22 | 11 | 26  | 8   | 16  | 26  | 5   |
| 387 | 61  | 7  | 19 | 84   | 23 | 19 | 21  | 10  | 6   | 14  | 3   |
| 388 | 54  | 11 | 20 | 67   | 7  | 8  | 20  | 7   | 2   | 20  | 6   |
| 389 | 38  | 14 | 68 | 69   | 23 | 21 | 16  | 11  | 25  | 477 | 163 |
| 390 | 11  | 4  | 2  | 26   | 7  | 5  | 6   | 5   | 19  | 16  | 10  |
| 392 | 98  | 14 | 9  | 228  | 14 | 10 | 650 | 141 | 61  | 679 | 22  |
| 394 | 28  | 5  | 45 | 34   | 5  | 2  | 13  | 3   | 6   | 16  | 3   |
| 395 | 26  | 9  | 16 | 27   | 5  | 16 | 13  | 10  | 2   | 15  | 7   |
| 396 | 411 | 73 | 55 | 136  | 15 | 19 | 6   | 2   | 2   | 251 | 80  |
| 397 | 64  | 15 | 15 | 68   | 40 | 19 | 103 | 16  | 23  | 101 | 38  |
| 398 | 164 | 4  | 16 | 135  | 11 | 9  | 86  | 12  | 7   | 79  | 21  |
| 399 | 34  | 10 | 3  | 42   | 13 | 17 | 17  | 3   | 5   | 12  | 1   |
| 401 | 10  | 3  | 8  | 28   | 7  | 9  | 3   | 1   | 2   | 16  | 5   |
| 402 | 22  | 4  | 8  | 32   | 5  | 24 | 22  | 12  | 5   | 18  | 8   |
| 403 | 28  | 3  | 5  | 26   | 5  | 4  | 24  | 10  | 11  | 18  | 7   |
| 419 | 26  | 3  | 14 | 56   | 3  | 8  | 15  | 9   | 2   | 13  | 5   |

|      |     |    |    |     |    |    |     |     |    |     |     |
|------|-----|----|----|-----|----|----|-----|-----|----|-----|-----|
| 420  | 29  | 2  | 12 | 53  | 19 | 5  | 7   | 3   | 1  | 15  | 5   |
| 423  | 75  | 24 | 17 | 73  | 5  | 11 | 20  | 9   | 13 | 17  | 14  |
| 425  | 55  | 12 | 21 | 53  | 12 | 26 | 18  | 11  | 3  | 16  | 4   |
| 426  | 16  | 2  | 8  | 18  | 2  | 2  | 9   | 7   | 2  | 20  | 6   |
| 428  | 39  | 9  | 13 | 29  | 4  | 7  | 29  | 14  | 8  | 19  | 11  |
| 429  | 29  | 6  | 5  | 27  | 6  | 12 | 24  | 13  | 8  | 17  | 9   |
| 431  | 32  | 8  | 14 | 44  | 10 | 11 | 6   | 3   | 5  | 24  | 7   |
| 432  | 13  | 5  | 7  | 42  | 11 | 11 | 4   | 3   | 1  | 19  | 11  |
| 433  | 19  | 5  | 3  | 13  | 5  | 9  | 23  | 7   | 4  | 11  | 5   |
| 434  | 30  | 6  | 4  | 22  | 4  | 9  | 21  | 12  | 4  | 21  | 12  |
| 435  | 122 | 15 | 13 | 51  | 4  | 16 | 33  | 15  | 12 | 23  | 10  |
| 436  | 45  | 25 | 59 | 26  | 5  | 9  | 11  | 6   | 12 | 21  | 15  |
| 437  | 117 | 15 | 13 | 373 | 25 | 15 | 46  | 25  | 22 | 255 | 99  |
| 479  | 19  | 3  | 3  | 11  | 2  | 4  | 20  | 7   | 7  | 19  | 2   |
| 480  | 372 | 20 | 5  | 219 | 30 | 20 | 176 | 116 | 11 | 186 | 146 |
| 481  | 340 | 75 | 15 | 366 | 12 | 21 | 227 | 18  | 13 | 240 | 6   |
| 483  | 67  | 24 | 8  | 65  | 24 | 35 | 9   | 3   | 32 | 18  | 14  |
| 492  | 9   | 5  | 5  | 29  | 7  | 10 | 3   | 2   | 0  | 10  | 3   |
| 493  | 11  | 3  | 2  | 7   | 2  | 2  | 24  | 9   | 10 | 18  | 4   |
| 495  | 16  | 3  | 3  | 18  | 9  | 3  | 14  | 0   | 2  | 14  | 2   |
| 496  | 21  | 5  | 8  | 31  | 3  | 21 | 28  | 8   | 6  | 20  | 8   |
| 497  | 231 | 27 | 46 | 283 | 38 | 41 | 112 | 42  | 15 | 158 | 81  |
| 498  | 8   | 1  | 3  | 17  | 4  | 12 | 2   | 1   | 2  | 12  | 4   |
| 499  | 18  | 5  | 5  | 14  | 4  | 1  | 14  | 6   | 7  | 18  | 8   |
| 501  | 21  | 5  | 5  | 15  | 4  | 2  | 20  | 10  | 8  | 23  | 19  |
| 502  | 51  | 9  | 8  | 39  | 10 | 16 | 15  | 6   | 5  | 11  | 3   |
| 503  | 14  | 4  | 7  | 22  | 9  | 9  | 10  | 7   | 5  | 41  | 8   |
| 504  | 10  | 3  | 2  | 26  | 1  | 8  | 1   | 0   | 1  | 16  | 4   |
| 505  | 33  | 2  | 4  | 21  | 1  | 7  | 41  | 25  | 6  | 38  | 32  |
| 506  | 236 | 9  | 18 | 209 | 37 | 27 | 167 | 118 | 11 | 183 | 102 |
| 527  | 25  | 4  | 5  | 25  | 4  | 9  | 13  | 9   | 3  | 11  | 2   |
| 528  | 30  | 7  | 14 | 42  | 9  | 10 | 12  | 8   | 5  | 22  | 5   |
| 529  | 5   | 1  | 2  | 28  | 5  | 5  | 2   | 0   | 2  | 13  | 6   |
| 530  | 32  | 3  | 9  | 25  | 11 | 4  | 17  | 10  | 6  | 20  | 14  |
| 531  | 45  | 7  | 9  | 38  | 6  | 7  | 27  | 16  | 21 | 19  | 8   |
| 534  | 30  | 14 | 3  | 71  | 19 | 9  | 3   | 2   | 1  | 15  | 3   |
| 535  | 13  | 1  | 2  | 15  | 6  | 4  | 18  | 8   | 4  | 17  | 7   |
| 536  | 31  | 6  | 1  | 31  | 3  | 10 | 31  | 18  | 4  | 22  | 4   |
| 537  | 36  | 8  | 12 | 32  | 8  | 13 | 35  | 11  | 9  | 26  | 5   |
| 538  | 21  | 6  | 21 | 41  | 25 | 8  | 16  | 11  | 25 | 21  | 13  |
| 539  | 8   | 2  | 4  | 27  | 4  | 2  | 3   | 2   | 1  | 13  | 3   |
| 540  | 12  | 3  | 2  | 8   | 3  | 4  | 24  | 7   | 4  | 24  | 7   |
| 541  | 24  | 8  | 6  | 26  | 7  | 3  | 27  | 12  | 18 | 22  | 3   |
| 542  | 24  | 5  | 3  | 30  | 6  | 5  | 23  | 4   | 2  | 20  | 7   |
| 625  | 32  | 7  | 8  | 18  | 6  | 4  | 25  | 6   | 2  | 24  | 9   |
| 627  | 48  | 2  | 9  | 60  | 7  | 11 | 49  | 8   | 5  | 45  | 11  |
| 800  | 21  | 5  | 1  | 64  | 12 | 27 | 3   | 1   | 2  | 19  | 8   |
| 801  | 39  | 4  | 12 | 35  | 4  | 10 | 65  | 24  | 8  | 24  | 7   |
| 900  | 19  | 3  | 7  | 15  | 7  | 4  | 15  | 4   | 4  | 15  | 4   |
| 1001 | 18  | 4  | 2  | 9   | 3  | 2  | 17  | 4   | 3  | 23  | 10  |

|      |     |     |    |      |     |     |      |     |     |      |     |
|------|-----|-----|----|------|-----|-----|------|-----|-----|------|-----|
| 1002 | 28  | 6   | 1  | 32   | 10  | 4   | 24   | 12  | 30  | 32   | 16  |
| 1003 | 36  | 13  | 23 | 41   | 16  | 13  | 21   | 4   | 4   | 19   | 7   |
| 1004 | 29  | 7   | 35 | 61   | 15  | 30  | 28   | 24  | 6   | 50   | 12  |
| 1005 | 6   | 3   | 5  | 23   | 4   | 7   | 2    | 1   | 1   | 13   | 6   |
| 1006 | 19  | 3   | 2  | 12   | 7   | 5   | 14   | 1   | 4   | 18   | 5   |
| 1007 | 21  | 4   | 4  | 17   | 2   | 4   | 16   | 4   | 8   | 12   | 4   |
| 1008 | 42  | 20  | 15 | 44   | 7   | 1   | 21   | 7   | 3   | 16   | 6   |
| 1009 | 14  | 4   | 26 | 22   | 6   | 19  | 9    | 5   | 18  | 15   | 9   |
| 1010 | 12  | 6   | 5  | 35   | 10  | 15  | 2    | 1   | 0   | 11   | 5   |
| 1011 | 16  | 4   | 2  | 18   | 11  | 4   | 11   | 6   | 6   | 14   | 7   |
| 1012 | 34  | 5   | 7  | 25   | 7   | 4   | 15   | 8   | 10  | 16   | 11  |
| 1013 | 42  | 9   | 16 | 47   | 18  | 4   | 23   | 8   | 4   | 16   | 7   |
| 1014 | 23  | 11  | 34 | 29   | 6   | 6   | 4    | 2   | 2   | 23   | 12  |
| 1015 | 8   | 1   | 6  | 33   | 3   | 3   | 1    | 0   | 1   | 6    | 2   |
| 1016 | 57  | 4   | 11 | 30   | 3   | 4   | 118  | 59  | 17  | 109  | 102 |
| 1017 | 25  | 8   | 5  | 27   | 6   | 3   | 17   | 8   | 9   | 11   | 3   |
| 1018 | 26  | 5   | 7  | 30   | 7   | 7   | 7    | 4   | 10  | 11   | 5   |
| 1019 | 19  | 7   | 17 | 23   | 3   | 7   | 5    | 3   | 3   | 14   | 3   |
| 1020 | 5   | 1   | 1  | 27   | 3   | 2   | 1    | 0   | 1   | 5    | 0   |
| 1021 | 410 | 57  | 29 | 254  | 63  | 41  | 44   | 24  | 19  | 173  | 83  |
| 1022 | 17  | 0   | 5  | 17   | 2   | 8   | 16   | 10  | 8   | 18   | 6   |
| 1023 | 126 | 27  | 10 | 33   | 9   | 14  | 118  | 49  | 28  | 34   | 13  |
| 1024 | 25  | 6   | 54 | 25   | 3   | 5   | 7    | 3   | 11  | 14   | 4   |
| 1025 | 6   | 3   | 10 | 32   | 5   | 2   | 1    | 0   | 1   | 9    | 4   |
| 1026 | 23  | 6   | 5  | 11   | 3   | 3   | 11   | 7   | 4   | 14   | 1   |
| 1027 | 42  | 8   | 5  | 23   | 7   | 4   | 25   | 20  | 13  | 16   | 4   |
| 1201 | 24  | 5   | 9  | 33   | 3   | 7   | 25   | 11  | 2   | 9    | 2   |
| 1202 | 19  | 7   | 38 | 29   | 7   | 12  | 10   | 8   | 18  | 17   | 7   |
| 1203 | 4   | 3   | 3  | 27   | 7   | 4   | 2    | 1   | 0   | 8    | 3   |
| 1204 | 21  | 6   | 7  | 20   | 8   | 3   | 14   | 6   | 4   | 18   | 6   |
| 1205 | 28  | 4   | 2  | 26   | 6   | 9   | 15   | 5   | 9   | 11   | 3   |
| 1206 | 39  | 15  | 25 | 47   | 18  | 17  | 20   | 4   | 6   | 57   | 31  |
| 1207 | 15  | 7   | 12 | 19   | 4   | 5   | 5    | 3   | 12  | 23   | 10  |
| 1208 | 103 | 10  | 6  | 5342 | 796 | 229 | 2    | 1   | 3   | 51   | 20  |
| 1209 | 17  | 4   | 3  | 12   | 3   | 2   | 14   | 3   | 7   | 14   | 2   |
| 1210 | 25  | 5   | 5  | 18   | 1   | 8   | 15   | 11  | 4   | 15   | 4   |
| 1211 | 38  | 7   | 6  | 35   | 4   | 5   | 15   | 3   | 4   | 13   | 5   |
| 1212 | 190 | 21  | 14 | 42   | 10  | 12  | 333  | 154 | 52  | 480  | 89  |
| 1213 | 5   | 1   | 1  | 32   | 10  | 3   | 1    | 0   | 1   | 6    | 1   |
| 1214 | 16  | 2   | 8  | 13   | 7   | 4   | 18   | 3   | 1   | 15   | 6   |
| 1215 | 24  | 3   | 10 | 17   | 3   | 12  | 17   | 4   | 4   | 15   | 3   |
| 1216 | 24  | 5   | 5  | 23   | 3   | 13  | 15   | 2   | 1   | 10   | 3   |
| 1217 | 31  | 4   | 29 | 45   | 6   | 21  | 7    | 5   | 2   | 17   | 5   |
| 1218 | 5   | 3   | 24 | 62   | 33  | 21  | 2    | 1   | 0   | 9    | 5   |
| 1219 | 23  | 6   | 6  | 22   | 7   | 34  | 15   | 7   | 9   | 16   | 11  |
| 1220 | 255 | 25  | 14 | 541  | 63  | 99  | 1492 | 435 | 100 | 1795 | 510 |
| 1221 | 38  | 20  | 25 | 45   | 15  | 13  | 14   | 6   | 2   | 9    | 6   |
| 1222 | 298 | 101 | 81 | 52   | 11  | 4   | 59   | 25  | 9   | 430  | 122 |
| 1223 | 5   | 1   | 2  | 35   | 3   | 1   | 1    | 0   | 0   | 6    | 1   |
| 1224 | 25  | 3   | 4  | 13   | 2   | 6   | 13   | 6   | 5   | 15   | 9   |

|      |     |     |     |     |     |      |     |    |     |       |      |
|------|-----|-----|-----|-----|-----|------|-----|----|-----|-------|------|
| 1225 | 40  | 15  | 2   | 41  | 17  | 10   | 21  | 16 | 3   | 10    | 5    |
| 1226 | 32  | 9   | 10  | 31  | 6   | 7    | 12  | 6  | 3   | 10    | 3    |
| 1230 | 19  | 6   | 3   | 19  | 2   | 19   | 7   | 3  | 6   | 15    | 4    |
| 1231 | 4   | 1   | 3   | 22  | 2   | 6    | 1   | 0  | 0   | 5     | 0    |
| 1232 | 17  | 3   | 2   | 19  | 5   | 4    | 21  | 7  | 6   | 15    | 8    |
| 1233 | 27  | 6   | 6   | 17  | 4   | 2    | 16  | 11 | 9   | 12    | 4    |
| 1234 | 42  | 23  | 27  | 29  | 8   | 6    | 14  | 8  | 2   | 15    | 1    |
| 1238 | 19  | 4   | 5   | 13  | 1   | 3    | 16  | 7  | 7   | 18    | 10   |
| 1239 | 30  | 3   | 4   | 22  | 6   | 3    | 16  | 11 | 5   | 10    | 0    |
| 1240 | 33  | 3   | 3   | 26  | 6   | 12   | 21  | 2  | 1   | 21    | 2    |
| 1241 | 22  | 4   | 2   | 23  | 5   | 6    | 11  | 6  | 10  | 17    | 6    |
| 1401 | 7   | 5   | 5   | 31  | 5   | 9    | 1   | 0  | 0   | 8     | 4    |
| 1402 | 21  | 6   | 2   | 14  | 5   | 1    | 13  | 6  | 2   | 15    | 4    |
| 1403 | 40  | 8   | 252 | 31  | 8   | 317  | 30  | 13 | 173 | 29    | 4    |
| 1404 | 31  | 10  | 5   | 23  | 4   | 5    | 14  | 2  | 6   | 9     | 2    |
| 1405 | 45  | 11  | 12  | 25  | 2   | 15   | 8   | 6  | 11  | 30    | 16   |
| 1406 | 7   | 2   | 2   | 25  | 0   | 3    | 1   | 0  | 1   | 6     | 1    |
| 1407 | 15  | 0   | 7   | 17  | 5   | 8    | 13  | 2  | 14  | 13    | 4    |
| 1408 | 25  | 2   | 3   | 25  | 4   | 3    | 12  | 1  | 5   | 13    | 2    |
| 1409 | 39  | 11  | 11  | 31  | 5   | 1    | 16  | 5  | 4   | 17    | 5    |
| 1410 | 36  | 9   | 9   | 22  | 2   | 4    | 7   | 5  | 3   | 20    | 10   |
| 1412 | 18  | 7   | 8   | 34  | 11  | 12   | 3   | 1  | 1   | 15    | 5    |
| 1413 | 29  | 4   | 0   | 22  | 7   | 11   | 13  | 2  | 2   | 20    | 7    |
| 1416 | 52  | 12  | 47  | 785 | 125 | 203  | 16  | 3  | 5   | 14787 | 2421 |
| 1418 | 54  | 21  | 16  | 109 | 20  | 22   | 15  | 3  | 3   | 17    | 8    |
| 1501 | 49  | 12  | 14  | 26  | 9   | 7    | 11  | 5  | 25  | 30    | 3    |
| 1601 | 16  | 12  | 11  | 246 | 21  | 77   | 1   | 0  | 1   | 11    | 1    |
| 1602 | 172 | 37  | 32  | 127 | 40  | 64   | 17  | 8  | 13  | 49    | 40   |
| 1603 | 42  | 13  | 54  | 28  | 6   | 7    | 21  | 11 | 1   | 19    | 11   |
| 1605 | 32  | 14  | 169 | 27  | 12  | 64   | 6   | 4  | 4   | 14    | 8    |
| 1606 | 17  | 10  | 27  | 327 | 26  | 51   | 1   | 0  | 0   | 9     | 7    |
| 1607 | 177 | 19  | 58  | 37  | 18  | 31   | 55  | 27 | 10  | 105   | 49   |
| 1608 | 111 | 6   | 13  | 38  | 10  | 7    | 32  | 13 | 13  | 62    | 33   |
| 1609 | 123 | 14  | 64  | 220 | 81  | 1621 | 43  | 42 | 3   | 32    | 11   |
| 1610 | 529 | 121 | 103 | 383 | 14  | 25   | 157 | 72 | 33  | 388   | 92   |
| 1611 | 6   | 2   | 1   | 38  | 5   | 17   | 1   | 0  | 0   | 7     | 1    |
| 1613 | 134 | 18  | 11  | 75  | 11  | 8    | 68  | 26 | 18  | 31    | 16   |
| 1614 | 96  | 6   | 18  | 90  | 7   | 41   | 35  | 22 | 6   | 55    | 5    |
| 1615 | 51  | 11  | 15  | 44  | 10  | 10   | 7   | 6  | 4   | 30    | 12   |
| 1616 | 3   | 1   | 3   | 27  | 3   | 2    | 1   | 0  | 0   | 6     | 3    |
| 1617 | 22  | 5   | 7   | 13  | 3   | 7    | 14  | 8  | 4   | 18    | 11   |
| 1618 | 28  | 5   | 4   | 19  | 3   | 3    | 19  | 12 | 6   | 14    | 3    |
| 1701 | 29  | 5   | 6   | 31  | 6   | 4    | 15  | 8  | 1   | 12    | 5    |
| 1702 | 20  | 9   | 2   | 27  | 8   | 12   | 7   | 6  | 2   | 19    | 4    |
| 1703 | 4   | 2   | 2   | 31  | 3   | 8    | 1   | 0  | 0   | 7     | 2    |
| 1705 | 51  | 6   | 7   | 47  | 19  | 25   | 20  | 10 | 5   | 24    | 4    |
| 1706 | 32  | 9   | 7   | 31  | 6   | 1    | 18  | 13 | 3   | 14    | 3    |
| 1707 | 26  | 4   | 9   | 35  | 12  | 5    | 18  | 2  | 6   | 18    | 3    |
| 1801 | 44  | 6   | 17  | 36  | 12  | 8    | 6   | 5  | 2   | 17    | 8    |
| 1802 | 4   | 2   | 1   | 31  | 5   | 5    | 1   | 0  | 1   | 4     | 0    |

|      |     |    |      |     |    |     |    |    |    |     |    |
|------|-----|----|------|-----|----|-----|----|----|----|-----|----|
| 1804 | 168 | 4  | 21   | 35  | 8  | 4   | 55 | 9  | 8  | 128 | 30 |
| 1806 | 27  | 4  | 3    | 22  | 5  | 8   | 18 | 9  | 4  | 15  | 3  |
| 1807 | 29  | 7  | 3    | 29  | 2  | 4   | 19 | 4  | 3  | 19  | 6  |
| 1808 | 83  | 34 | 14   | 163 | 21 | 23  | 8  | 5  | 12 | 19  | 9  |
| 1809 | 4   | 1  | 1    | 35  | 3  | 5   | 1  | 0  | 0  | 7   | 4  |
| 1810 | 37  | 6  | 6    | 32  | 7  | 28  | 18 | 5  | 8  | 24  | 10 |
| 2001 | 31  | 2  | 2    | 18  | 1  | 4   | 14 | 2  | 5  | 13  | 3  |
| 2002 | 22  | 7  | 7    | 31  | 9  | 3   | 13 | 3  | 4  | 14  | 6  |
| 2003 | 24  | 11 | 10   | 35  | 12 | 10  | 8  | 6  | 3  | 14  | 4  |
| 2004 | 4   | 1  | 1    | 28  | 2  | 11  | 1  | 0  | 0  | 5   | 3  |
| 2005 | 22  | 8  | 106  | 16  | 4  | 145 | 18 | 8  | 7  | 13  | 7  |
| 2006 | 66  | 23 | 288  | 47  | 14 | 234 | 18 | 9  | 8  | 59  | 37 |
| 2007 | 40  | 13 | 10   | 54  | 11 | 154 | 11 | 6  | 6  | 7   | 1  |
| 2008 | 20  | 9  | 167  | 25  | 10 | 136 | 3  | 1  | 1  | 14  | 8  |
| 2009 | 3   | 2  | 1    | 38  | 3  | 5   | 1  | 0  | 0  | 3   | 1  |
| 2010 | 28  | 10 | 3    | 20  | 6  | 1   | 13 | 5  | 10 | 12  | 10 |
| 2011 | 29  | 6  | 13   | 31  | 7  | 4   | 18 | 10 | 3  | 6   | 3  |
| 2012 | 35  | 7  | 11   | 44  | 11 | 11  | 11 | 9  | 6  | 10  | 4  |
| 2013 | 35  | 22 | 6    | 48  | 20 | 23  | 5  | 4  | 2  | 28  | 14 |
| 2101 | 124 | 74 | 56   | 55  | 4  | 6   | 1  | 0  | 2  | 40  | 11 |
| 2102 | 32  | 9  | 7    | 25  | 8  | 6   | 13 | 7  | 15 | 18  | 10 |
| 2103 | 28  | 4  | 23   | 35  | 14 | 10  | 16 | 10 | 7  | 16  | 7  |
| 2104 | 44  | 10 | 15   | 41  | 8  | 5   | 16 | 8  | 4  | 14  | 3  |
| 2105 | 161 | 17 | 1017 | 273 | 39 | 90  | 68 | 24 | 6  | 56  | 24 |
| 2106 | 6   | 3  | 3    | 30  | 7  | 7   | 1  | 0  | 0  | 7   | 1  |
| 2107 | 50  | 4  | 9    | 15  | 3  | 6   | 17 | 5  | 5  | 17  | 8  |
| 2201 | 28  | 4  | 3    | 28  | 4  | 2   | 12 | 7  | 14 | 15  | 8  |
| 2202 | 27  | 8  | 15   | 36  | 6  | 16  | 13 | 4  | 5  | 17  | 6  |
| 2203 | 23  | 7  | 30   | 28  | 4  | 20  | 5  | 3  | 16 | 14  | 4  |
| 2204 | 3   | 0  | 2    | 29  | 5  | 5   | 1  | 0  | 0  | 5   | 3  |
| 2205 | 104 | 5  | 7    | 29  | 2  | 10  | 24 | 13 | 6  | 18  | 4  |
| 2206 | 33  | 6  | 20   | 24  | 1  | 3   | 14 | 7  | 10 | 21  | 10 |
| 2207 | 54  | 6  | 4    | 27  | 4  | 5   | 16 | 5  | 4  | 23  | 4  |
| 2208 | 28  | 7  | 15   | 35  | 14 | 9   | 9  | 4  | 13 | 8   | 1  |
| 2209 | 3   | 1  | 3    | 33  | 4  | 8   | 1  | 0  | 0  | 5   | 2  |
| 2210 | 20  | 1  | 5    | 11  | 2  | 7   | 23 | 9  | 4  | 25  | 10 |
| 2211 | 31  | 3  | 13   | 24  | 1  | 5   | 16 | 8  | 7  | 13  | 2  |
| 2212 | 41  | 12 | 20   | 44  | 14 | 9   | 19 | 3  | 3  | 19  | 8  |
| 3001 | 31  | 4  | 4    | 18  | 7  | 9   | 18 | 6  | 9  | 21  | 10 |
| 3301 | 32  | 4  | 4    | 20  | 1  | 13  | 17 | 3  | 8  | 11  | 2  |
| 3302 | 38  | 5  | 8    | 38  | 8  | 14  | 21 | 3  | 1  | 16  | 9  |
| 3401 | 17  | 5  | 5    | 23  | 5  | 4   | 6  | 1  | 9  | 18  | 8  |
| 9001 | 4   | 0  | 2    | 47  | 13 | 10  | 1  | 0  | 0  | 6   | 2  |
| 9002 | 37  | 9  | 763  | 23  | 15 | 10  | 14 | 10 | 5  | 9   | 3  |
| 9003 | 44  | 18 | 16   | 54  | 19 | 871 | 15 | 11 | 6  | 8   | 4  |

Supplementary Table 3.8 represents all fluorescent signals (0-65535 RFU, relative fluorescent units) for groups of mice gavage orally of a sample of non-sterile mice feces

| Mouse ID | 8.1    |        |        | 8.2    |        |        | 8.3    |        |        | 8.4    |        |  |
|----------|--------|--------|--------|--------|--------|--------|--------|--------|--------|--------|--------|--|
| Nr       | Median | -1st Q | +3rd Q | Median | -1st Q | +3rd Q | Median | -1st Q | +3rd Q | Median | -1st Q |  |

|     |      |     |      |       |      |      |      |      |      |      |     |
|-----|------|-----|------|-------|------|------|------|------|------|------|-----|
| 001 | 118  | 18  | 44   | 155   | 13   | 92   | 47   | 10   | 13   | 101  | 43  |
| 002 | 258  | 123 | 80   | 406   | 175  | 62   | 99   | 35   | 11   | 214  | 117 |
| 003 | 218  | 95  | 28   | 337   | 95   | 92   | 1259 | 1145 | 137  | 939  | 481 |
| 004 | 87   | 8   | 44   | 185   | 3    | 73   | 168  | 78   | 66   | 559  | 180 |
| 005 | 23   | 7   | 9    | 88    | 31   | 14   | 9    | 2    | 2    | 6    | 3   |
| 006 | 481  | 105 | 162  | 337   | 91   | 65   | 51   | 8    | 7    | 1158 | 104 |
| 007 | 90   | 24  | 88   | 302   | 175  | 49   | 56   | 13   | 17   | 94   | 59  |
| 009 | 85   | 11  | 22   | 160   | 26   | 10   | 95   | 38   | 24   | 214  | 113 |
| 010 | 24   | 18  | 26   | 384   | 64   | 68   | 15   | 7    | 2    | 7    | 3   |
| 011 | 164  | 98  | 21   | 2151  | 148  | 611  | 70   | 16   | 22   | 71   | 32  |
| 012 | 75   | 26  | 19   | 127   | 36   | 58   | 80   | 20   | 38   | 66   | 28  |
| 013 | 334  | 96  | 76   | 3716  | 472  | 237  | 448  | 217  | 44   | 193  | 55  |
| 014 | 55   | 4   | 5    | 119   | 48   | 58   | 55   | 18   | 11   | 156  | 58  |
| 015 | 4    | 2   | 4    | 51    | 21   | 12   | 8    | 1    | 3    | 2    | 1   |
| 016 | 59   | 21  | 18   | 174   | 50   | 36   | 44   | 11   | 3    | 10   | 2   |
| 017 | 75   | 38  | 14   | 195   | 79   | 105  | 57   | 8    | 7    | 37   | 8   |
| 018 | 43   | 6   | 31   | 182   | 45   | 34   | 47   | 6    | 15   | 66   | 13  |
| 019 | 125  | 40  | 15   | 467   | 61   | 38   | 54   | 16   | 9    | 6728 | 258 |
| 020 | 311  | 188 | 1153 | 14971 | 3225 | 1827 | 898  | 473  | 1262 | 305  | 291 |
| 021 | 65   | 15  | 31   | 176   | 35   | 50   | 41   | 13   | 7    | 16   | 4   |
| 022 | 118  | 60  | 35   | 200   | 73   | 48   | 30   | 3    | 18   | 52   | 21  |
| 023 | 62   | 19  | 43   | 161   | 34   | 30   | 47   | 4    | 12   | 111  | 59  |
| 024 | 209  | 45  | 35   | 1163  | 129  | 265  | 153  | 28   | 22   | 248  | 47  |
| 025 | 144  | 78  | 7    | 50    | 20   | 45   | 10   | 1    | 0    | 149  | 53  |
| 026 | 62   | 24  | 23   | 155   | 97   | 9    | 7185 | 1389 | 2493 | 11   | 1   |
| 027 | 76   | 16  | 35   | 130   | 38   | 45   | 56   | 24   | 14   | 74   | 14  |
| 037 | 71   | 22  | 46   | 144   | 15   | 42   | 67   | 15   | 24   | 106  | 41  |
| 038 | 195  | 76  | 68   | 84    | 31   | 23   | 45   | 8    | 26   | 131  | 44  |
| 043 | 121  | 86  | 19   | 84    | 60   | 117  | 52   | 17   | 14   | 15   | 5   |
| 044 | 64   | 26  | 20   | 141   | 85   | 22   | 49   | 11   | 10   | 64   | 21  |
| 045 | 57   | 16  | 94   | 108   | 34   | 74   | 58   | 11   | 15   | 107  | 25  |
| 046 | 58   | 18  | 9    | 95    | 52   | 24   | 62   | 20   | 18   | 82   | 14  |
| 047 | 55   | 11  | 13   | 170   | 58   | 119  | 44   | 7    | 13   | 31   | 11  |
| 048 | 29   | 14  | 117  | 175   | 154  | 106  | 39   | 10   | 3    | 19   | 9   |
| 049 | 98   | 24  | 13   | 160   | 73   | 250  | 41   | 11   | 6    | 53   | 16  |
| 050 | 105  | 37  | 81   | 164   | 15   | 55   | 46   | 16   | 43   | 119  | 80  |
| 051 | 71   | 2   | 94   | 64    | 19   | 8    | 38   | 19   | 13   | 36   | 12  |
| 052 | 11   | 6   | 10   | 83    | 58   | 28   | 8    | 2    | 3    | 5    | 2   |
| 053 | 33   | 11  | 10   | 171   | 118  | 48   | 34   | 8    | 15   | 12   | 3   |
| 054 | 108  | 34  | 20   | 177   | 70   | 45   | 42   | 5    | 12   | 41   | 24  |
| 055 | 73   | 12  | 53   | 137   | 48   | 18   | 31   | 7    | 25   | 66   | 43  |
| 071 | 92   | 13  | 33   | 251   | 50   | 463  | 114  | 32   | 27   | 401  | 86  |
| 072 | 10   | 3   | 5    | 79    | 22   | 33   | 58   | 44   | 56   | 5    | 2   |
| 073 | 60   | 32  | 10   | 174   | 132  | 25   | 27   | 5    | 6    | 16   | 10  |
| 074 | 5385 | 540 | 422  | 115   | 21   | 95   | 73   | 19   | 23   | 26   | 11  |
| 075 | 55   | 14  | 31   | 698   | 57   | 107  | 43   | 10   | 31   | 3794 | 252 |
| 076 | 70   | 12  | 18   | 166   | 96   | 66   | 41   | 12   | 7    | 61   | 16  |
| 077 | 19   | 15  | 14   | 69    | 55   | 36   | 15   | 5    | 6    | 4    | 2   |
| 078 | 68   | 37  | 19   | 158   | 46   | 27   | 33   | 8    | 5    | 7    | 2   |
| 080 | 4393 | 423 | 475  | 169   | 20   | 82   | 49   | 12   | 8    | 398  | 61  |

|     |     |     |    |      |      |      |      |     |     |      |     |
|-----|-----|-----|----|------|------|------|------|-----|-----|------|-----|
| 081 | 254 | 48  | 75 | 104  | 23   | 30   | 29   | 2   | 2   | 204  | 50  |
| 082 | 4   | 1   | 19 | 9    | 3    | 4    | 10   | 1   | 6   | 9    | 2   |
| 083 | 35  | 9   | 11 | 146  | 48   | 51   | 27   | 6   | 27  | 7    | 1   |
| 084 | 83  | 12  | 4  | 187  | 44   | 34   | 38   | 12  | 5   | 77   | 33  |
| 085 | 119 | 24  | 26 | 157  | 29   | 41   | 39   | 9   | 10  | 60   | 23  |
| 086 | 99  | 15  | 42 | 97   | 12   | 20   | 34   | 7   | 4   | 61   | 18  |
| 087 | 14  | 8   | 11 | 34   | 23   | 31   | 13   | 2   | 3   | 5    | 1   |
| 088 | 153 | 126 | 28 | 211  | 102  | 40   | 155  | 11  | 43  | 49   | 29  |
| 089 | 160 | 19  | 27 | 197  | 25   | 25   | 34   | 3   | 9   | 51   | 28  |
| 092 | 93  | 25  | 70 | 157  | 23   | 33   | 37   | 5   | 10  | 114  | 22  |
| 093 | 10  | 6   | 1  | 42   | 30   | 38   | 8    | 2   | 1   | 3    | 2   |
| 094 | 46  | 16  | 13 | 184  | 150  | 32   | 32   | 8   | 13  | 8    | 2   |
| 096 | 169 | 58  | 33 | 94   | 10   | 76   | 41   | 18  | 9   | 77   | 32  |
| 097 | 212 | 35  | 39 | 99   | 11   | 5    | 42   | 7   | 6   | 57   | 7   |
| 098 | 18  | 13  | 23 | 70   | 38   | 24   | 11   | 4   | 4   | 4    | 0   |
| 099 | 22  | 7   | 54 | 215  | 175  | 122  | 38   | 11  | 5   | 18   | 10  |
| 100 | 44  | 7   | 4  | 174  | 81   | 80   | 39   | 17  | 3   | 25   | 12  |
| 101 | 234 | 99  | 67 | 201  | 54   | 39   | 67   | 28  | 27  | 97   | 89  |
| 102 | 242 | 33  | 72 | 220  | 20   | 8    | 51   | 20  | 16  | 57   | 30  |
| 103 | 37  | 33  | 69 | 50   | 19   | 4    | 17   | 6   | 3   | 5    | 1   |
| 104 | 116 | 39  | 50 | 173  | 102  | 24   | 43   | 6   | 2   | 18   | 9   |
| 105 | 161 | 17  | 35 | 171  | 53   | 36   | 30   | 3   | 1   | 22   | 10  |
| 106 | 137 | 72  | 21 | 140  | 17   | 18   | 32   | 11  | 53  | 89   | 41  |
| 107 | 224 | 17  | 92 | 120  | 44   | 14   | 40   | 18  | 15  | 92   | 29  |
| 110 | 86  | 32  | 26 | 218  | 119  | 38   | 34   | 11  | 7   | 22   | 11  |
| 111 | 48  | 16  | 22 | 152  | 30   | 39   | 40   | 12  | 11  | 104  | 76  |
| 112 | 47  | 14  | 11 | 169  | 73   | 17   | 36   | 14  | 28  | 102  | 60  |
| 113 | 202 | 33  | 38 | 1350 | 194  | 87   | 120  | 12  | 10  | 156  | 24  |
| 114 | 6   | 3   | 3  | 43   | 26   | 69   | 12   | 4   | 1   | 7    | 3   |
| 115 | 34  | 12  | 14 | 2277 | 2021 | 241  | 241  | 98  | 32  | 118  | 42  |
| 116 | 55  | 9   | 5  | 157  | 51   | 40   | 63   | 8   | 18  | 86   | 50  |
| 117 | 105 | 14  | 30 | 6130 | 1049 | 1012 | 5797 | 443 | 375 | 3652 | 402 |
| 118 | 476 | 95  | 75 | 129  | 26   | 22   | 29   | 3   | 6   | 255  | 20  |
| 119 | 6   | 3   | 6  | 14   | 6    | 18   | 7    | 3   | 4   | 5    | 3   |
| 120 | 31  | 10  | 14 | 157  | 52   | 55   | 21   | 3   | 6   | 15   | 7   |
| 121 | 44  | 13  | 19 | 139  | 41   | 48   | 32   | 5   | 0   | 41   | 13  |
| 122 | 34  | 5   | 24 | 112  | 58   | 49   | 27   | 7   | 6   | 73   | 17  |
| 123 | 59  | 11  | 11 | 85   | 36   | 14   | 27   | 4   | 4   | 2804 | 179 |
| 125 | 265 | 117 | 18 | 210  | 80   | 28   | 1443 | 853 | 539 | 145  | 69  |
| 126 | 132 | 12  | 37 | 136  | 49   | 25   | 35   | 7   | 14  | 47   | 15  |
| 127 | 99  | 22  | 16 | 474  | 112  | 36   | 68   | 7   | 41  | 80   | 21  |
| 128 | 108 | 17  | 8  | 346  | 99   | 63   | 62   | 9   | 7   | 83   | 25  |
| 129 | 54  | 52  | 57 | 8    | 3    | 2    | 17   | 6   | 2   | 4    | 2   |
| 130 | 99  | 31  | 41 | 173  | 155  | 35   | 31   | 6   | 10  | 10   | 4   |
| 131 | 261 | 67  | 66 | 156  | 23   | 64   | 52   | 4   | 7   | 67   | 38  |
| 132 | 110 | 54  | 46 | 202  | 60   | 29   | 59   | 15  | 20  | 69   | 29  |
| 133 | 92  | 13  | 4  | 201  | 46   | 122  | 51   | 5   | 9   | 107  | 54  |
| 134 | 12  | 8   | 9  | 73   | 42   | 19   | 20   | 9   | 2   | 6    | 3   |
| 135 | 30  | 13  | 14 | 243  | 190  | 92   | 39   | 10  | 11  | 11   | 5   |
| 136 | 97  | 4   | 20 | 307  | 117  | 57   | 52   | 14  | 19  | 40   | 21  |

|     |     |     |     |       |      |      |       |      |      |     |     |
|-----|-----|-----|-----|-------|------|------|-------|------|------|-----|-----|
| 137 | 93  | 4   | 16  | 267   | 67   | 60   | 83    | 48   | 31   | 121 | 53  |
| 138 | 95  | 13  | 13  | 199   | 25   | 47   | 45    | 17   | 15   | 65  | 42  |
| 139 | 21  | 17  | 20  | 3405  | 3361 | 7712 | 871   | 675  | 430  | 4   | 1   |
| 140 | 190 | 91  | 53  | 285   | 136  | 80   | 143   | 73   | 29   | 105 | 39  |
| 142 | 100 | 15  | 18  | 106   | 17   | 27   | 50    | 18   | 28   | 102 | 76  |
| 143 | 113 | 28  | 13  | 73    | 19   | 111  | 24    | 5    | 6    | 64  | 26  |
| 144 | 19  | 14  | 22  | 69    | 34   | 20   | 12    | 2    | 10   | 6   | 3   |
| 145 | 89  | 45  | 30  | 203   | 63   | 85   | 33    | 5    | 9    | 17  | 7   |
| 146 | 72  | 24  | 9   | 485   | 60   | 303  | 35    | 3    | 6    | 92  | 55  |
| 149 | 28  | 24  | 31  | 70    | 61   | 31   | 18    | 3    | 3    | 6   | 2   |
| 150 | 148 | 93  | 42  | 216   | 111  | 29   | 46    | 5    | 21   | 24  | 8   |
| 151 | 107 | 32  | 36  | 192   | 52   | 103  | 33    | 7    | 4    | 88  | 20  |
| 152 | 79  | 19  | 45  | 411   | 29   | 60   | 47    | 11   | 65   | 115 | 48  |
| 153 | 135 | 33  | 20  | 2654  | 42   | 417  | 56    | 14   | 18   | 88  | 20  |
| 154 | 27  | 24  | 260 | 30    | 22   | 37   | 18    | 6    | 5    | 7   | 3   |
| 156 | 113 | 39  | 22  | 211   | 76   | 30   | 40    | 10   | 7    | 75  | 10  |
| 158 | 237 | 43  | 22  | 105   | 23   | 19   | 42    | 7    | 19   | 78  | 32  |
| 159 | 7   | 4   | 57  | 52    | 43   | 44   | 17    | 4    | 5    | 7   | 3   |
| 160 | 65  | 31  | 13  | 370   | 150  | 166  | 28    | 4    | 9    | 23  | 13  |
| 161 | 78  | 20  | 33  | 885   | 700  | 935  | 27    | 3    | 12   | 50  | 14  |
| 162 | 164 | 70  | 70  | 21553 | 3738 | 5660 | 45    | 17   | 50   | 108 | 55  |
| 164 | 14  | 12  | 14  | 271   | 265  | 1010 | 24    | 9    | 3    | 6   | 4   |
| 165 | 43  | 18  | 12  | 152   | 102  | 59   | 87    | 40   | 29   | 15  | 6   |
| 166 | 52  | 11  | 23  | 120   | 29   | 13   | 30957 | 2878 | 5264 | 370 | 106 |
| 167 | 227 | 29  | 51  | 103   | 15   | 24   | 60    | 14   | 11   | 508 | 24  |
| 168 | 211 | 39  | 17  | 88    | 10   | 30   | 58    | 6    | 9    | 58  | 13  |
| 169 | 28  | 20  | 67  | 61    | 25   | 51   | 23    | 4    | 3    | 8   | 3   |
| 170 | 59  | 30  | 37  | 331   | 120  | 74   | 47    | 11   | 12   | 21  | 8   |
| 171 | 85  | 27  | 21  | 162   | 80   | 40   | 31    | 9    | 7    | 29  | 5   |
| 173 | 102 | 33  | 18  | 118   | 13   | 16   | 48    | 28   | 14   | 49  | 21  |
| 174 | 170 | 19  | 17  | 117   | 29   | 19   | 33    | 14   | 12   | 54  | 19  |
| 175 | 6   | 3   | 22  | 44    | 27   | 27   | 17    | 6    | 4    | 12  | 6   |
| 176 | 128 | 11  | 9   | 501   | 133  | 39   | 48    | 18   | 25   | 32  | 19  |
| 177 | 505 | 79  | 37  | 494   | 76   | 110  | 83    | 3    | 24   | 307 | 163 |
| 178 | 93  | 22  | 34  | 1950  | 187  | 455  | 68    | 26   | 75   | 127 | 68  |
| 179 | 106 | 17  | 32  | 2005  | 673  | 657  | 61    | 17   | 26   | 102 | 7   |
| 180 | 14  | 8   | 26  | 1610  | 1584 | 1859 | 23    | 7    | 4    | 7   | 3   |
| 181 | 415 | 139 | 70  | 576   | 108  | 66   | 86    | 37   | 15   | 179 | 32  |
| 182 | 102 | 47  | 32  | 146   | 47   | 41   | 46    | 9    | 5    | 52  | 19  |
| 183 | 109 | 18  | 92  | 124   | 40   | 7    | 60    | 12   | 51   | 103 | 41  |
| 184 | 144 | 5   | 14  | 143   | 80   | 21   | 51    | 24   | 5    | 110 | 33  |
| 186 | 85  | 27  | 13  | 194   | 58   | 9    | 40    | 9    | 10   | 13  | 4   |
| 187 | 76  | 7   | 8   | 141   | 58   | 46   | 35    | 5    | 3    | 45  | 21  |
| 188 | 89  | 37  | 12  | 119   | 28   | 18   | 36    | 10   | 10   | 51  | 14  |
| 189 | 258 | 69  | 113 | 112   | 25   | 117  | 80    | 24   | 60   | 146 | 17  |
| 190 | 25  | 19  | 10  | 66    | 57   | 73   | 23    | 8    | 4    | 8   | 2   |
| 191 | 61  | 11  | 16  | 240   | 34   | 256  | 41    | 10   | 5    | 14  | 2   |
| 192 | 86  | 7   | 54  | 138   | 52   | 58   | 31    | 3    | 7    | 58  | 19  |
| 193 | 92  | 14  | 22  | 110   | 49   | 38   | 54    | 24   | 17   | 88  | 12  |
| 194 | 116 | 33  | 32  | 940   | 307  | 500  | 41    | 10   | 11   | 76  | 28  |



|     |     |     |     |      |      |     |     |     |     |     |     |
|-----|-----|-----|-----|------|------|-----|-----|-----|-----|-----|-----|
| 195 | 17  | 14  | 19  | 1632 | 1248 | 947 | 13  | 3   | 5   | 5   | 1   |
| 196 | 59  | 16  | 13  | 146  | 84   | 51  | 31  | 7   | 7   | 18  | 11  |
| 197 | 72  | 27  | 40  | 75   | 30   | 60  | 41  | 13  | 24  | 63  | 22  |
| 198 | 160 | 30  | 28  | 102  | 18   | 8   | 90  | 21  | 24  | 110 | 23  |
| 199 | 97  | 38  | 7   | 47   | 4    | 4   | 39  | 3   | 9   | 90  | 15  |
| 200 | 68  | 37  | 11  | 22   | 12   | 32  | 17  | 4   | 4   | 7   | 3   |
| 201 | 178 | 7   | 8   | 137  | 98   | 69  | 44  | 5   | 17  | 20  | 11  |
| 202 | 83  | 23  | 25  | 404  | 188  | 582 | 49  | 9   | 7   | 58  | 24  |
| 203 | 163 | 49  | 35  | 90   | 30   | 38  | 38  | 11  | 10  | 93  | 47  |
| 204 | 141 | 3   | 8   | 68   | 19   | 23  | 42  | 7   | 18  | 38  | 5   |
| 205 | 50  | 21  | 21  | 86   | 45   | 92  | 19  | 7   | 7   | 10  | 2   |
| 206 | 60  | 24  | 15  | 202  | 86   | 58  | 41  | 16  | 2   | 22  | 9   |
| 207 | 94  | 21  | 10  | 225  | 75   | 34  | 36  | 6   | 10  | 56  | 21  |
| 215 | 146 | 27  | 25  | 127  | 16   | 11  | 75  | 42  | 23  | 126 | 81  |
| 216 | 300 | 57  | 22  | 272  | 65   | 22  | 205 | 146 | 7   | 244 | 48  |
| 217 | 138 | 132 | 148 | 361  | 311  | 263 | 96  | 72  | 39  | 42  | 12  |
| 219 | 54  | 8   | 14  | 207  | 91   | 14  | 62  | 29  | 17  | 14  | 4   |
| 220 | 83  | 6   | 61  | 243  | 111  | 187 | 46  | 2   | 12  | 60  | 32  |
| 221 | 63  | 5   | 3   | 148  | 39   | 9   | 31  | 1   | 12  | 97  | 22  |
| 222 | 222 | 34  | 30  | 138  | 27   | 20  | 37  | 4   | 3   | 73  | 14  |
| 223 | 21  | 10  | 14  | 80   | 75   | 17  | 16  | 4   | 8   | 10  | 6   |
| 225 | 201 | 117 | 60  | 173  | 44   | 41  | 52  | 15  | 4   | 51  | 14  |
| 226 | 76  | 16  | 25  | 157  | 45   | 27  | 42  | 15  | 8   | 82  | 34  |
| 227 | 212 | 20  | 23  | 100  | 23   | 72  | 45  | 3   | 16  | 65  | 12  |
| 228 | 42  | 37  | 43  | 47   | 41   | 46  | 33  | 11  | 4   | 12  | 3   |
| 229 | 45  | 4   | 12  | 156  | 47   | 26  | 79  | 16  | 13  | 13  | 3   |
| 231 | 124 | 43  | 46  | 155  | 89   | 46  | 37  | 10  | 6   | 28  | 5   |
| 232 | 124 | 25  | 17  | 150  | 22   | 15  | 32  | 1   | 6   | 102 | 62  |
| 233 | 235 | 29  | 30  | 162  | 6    | 15  | 101 | 25  | 12  | 74  | 29  |
| 234 | 90  | 81  | 18  | 100  | 60   | 32  | 35  | 4   | 5   | 14  | 2   |
| 235 | 147 | 41  | 24  | 133  | 6    | 38  | 22  | 2   | 9   | 22  | 11  |
| 236 | 71  | 39  | 10  | 124  | 37   | 26  | 36  | 4   | 3   | 45  | 11  |
| 237 | 83  | 13  | 20  | 103  | 27   | 20  | 47  | 7   | 27  | 99  | 20  |
| 239 | 62  | 23  | 19  | 72   | 54   | 52  | 23  | 9   | 4   | 8   | 2   |
| 240 | 44  | 25  | 16  | 140  | 63   | 68  | 26  | 2   | 13  | 20  | 8   |
| 241 | 55  | 26  | 25  | 114  | 73   | 34  | 34  | 11  | 3   | 51  | 6   |
| 242 | 106 | 31  | 12  | 60   | 17   | 18  | 44  | 10  | 29  | 70  | 14  |
| 243 | 190 | 59  | 77  | 93   | 27   | 12  | 35  | 4   | 11  | 48  | 4   |
| 245 | 16  | 10  | 125 | 71   | 57   | 30  | 20  | 4   | 6   | 18  | 9   |
| 246 | 114 | 20  | 44  | 249  | 8    | 62  | 33  | 3   | 5   | 17  | 5   |
| 247 | 68  | 8   | 24  | 78   | 33   | 23  | 38  | 3   | 4   | 24  | 5   |
| 248 | 197 | 35  | 27  | 271  | 94   | 73  | 247 | 41  | 44  | 192 | 24  |
| 249 | 252 | 34  | 59  | 148  | 27   | 46  | 146 | 22  | 14  | 47  | 6   |
| 250 | 31  | 24  | 17  | 103  | 31   | 58  | 37  | 15  | 17  | 10  | 3   |
| 251 | 735 | 710 | 544 | 173  | 17   | 41  | 54  | 2   | 11  | 29  | 8   |
| 252 | 146 | 74  | 34  | 299  | 181  | 46  | 998 | 759 | 128 | 136 | 8   |
| 253 | 576 | 57  | 32  | 138  | 9    | 13  | 574 | 197 | 94  | 360 | 203 |
| 254 | 202 | 29  | 7   | 133  | 47   | 38  | 50  | 33  | 7   | 92  | 57  |
| 255 | 72  | 31  | 38  | 96   | 23   | 20  | 43  | 9   | 29  | 27  | 10  |
| 256 | 263 | 136 | 64  | 8710 | 412  | 226 | 241 | 30  | 34  | 355 | 52  |

|     |      |     |     |      |     |     |     |     |     |      |      |
|-----|------|-----|-----|------|-----|-----|-----|-----|-----|------|------|
| 258 | 45   | 11  | 11  | 133  | 63  | 114 | 24  | 4   | 2   | 41   | 12   |
| 259 | 143  | 11  | 65  | 128  | 3   | 27  | 51  | 18  | 22  | 76   | 44   |
| 260 | 256  | 32  | 27  | 159  | 29  | 35  | 89  | 50  | 24  | 80   | 31   |
| 261 | 102  | 52  | 8   | 87   | 45  | 43  | 32  | 5   | 8   | 19   | 5    |
| 262 | 43   | 8   | 6   | 155  | 60  | 46  | 34  | 3   | 6   | 20   | 7    |
| 263 | 1274 | 675 | 237 | 203  | 101 | 42  | 108 | 28  | 9   | 4179 | 2042 |
| 264 | 158  | 28  | 48  | 328  | 57  | 66  | 40  | 5   | 17  | 95   | 35   |
| 266 | 125  | 98  | 16  | 79   | 28  | 58  | 32  | 8   | 6   | 13   | 5    |
| 267 | 136  | 46  | 54  | 250  | 74  | 43  | 930 | 118 | 108 | 63   | 33   |
| 268 | 89   | 56  | 22  | 157  | 87  | 24  | 63  | 29  | 10  | 135  | 44   |
| 287 | 105  | 15  | 27  | 113  | 24  | 17  | 37  | 9   | 14  | 67   | 29   |
| 288 | 179  | 38  | 41  | 81   | 36  | 36  | 27  | 2   | 2   | 47   | 11   |
| 289 | 25   | 20  | 24  | 83   | 72  | 48  | 34  | 10  | 11  | 13   | 8    |
| 290 | 50   | 5   | 9   | 191  | 93  | 56  | 31  | 5   | 3   | 24   | 5    |
| 291 | 106  | 59  | 25  | 1488 | 425 | 128 | 42  | 7   | 7   | 42   | 10   |
| 292 | 88   | 13  | 10  | 94   | 9   | 17  | 33  | 6   | 13  | 74   | 21   |
| 293 | 155  | 71  | 41  | 90   | 25  | 20  | 27  | 3   | 18  | 40   | 5    |
| 294 | 10   | 5   | 17  | 43   | 38  | 73  | 25  | 6   | 11  | 16   | 6    |
| 295 | 114  | 19  | 36  | 205  | 45  | 17  | 35  | 6   | 9   | 25   | 4    |
| 296 | 59   | 26  | 11  | 180  | 72  | 74  | 30  | 2   | 4   | 55   | 13   |
| 297 | 69   | 18  | 5   | 222  | 29  | 88  | 59  | 12  | 28  | 66   | 18   |
| 298 | 244  | 46  | 32  | 127  | 14  | 41  | 34  | 12  | 8   | 55   | 13   |
| 299 | 37   | 27  | 31  | 52   | 47  | 82  | 29  | 5   | 5   | 13   | 3    |
| 300 | 122  | 8   | 24  | 165  | 74  | 95  | 35  | 12  | 17  | 17   | 5    |
| 302 | 123  | 21  | 36  | 305  | 12  | 40  | 51  | 18  | 18  | 53   | 7    |
| 303 | 157  | 97  | 26  | 111  | 49  | 66  | 52  | 11  | 4   | 61   | 12   |
| 304 | 26   | 13  | 18  | 85   | 51  | 29  | 26  | 9   | 6   | 10   | 2    |
| 305 | 64   | 44  | 14  | 304  | 27  | 133 | 44  | 11  | 9   | 27   | 13   |
| 306 | 94   | 54  | 52  | 143  | 86  | 57  | 26  | 3   | 8   | 35   | 7    |
| 307 | 53   | 12  | 31  | 113  | 36  | 12  | 36  | 14  | 36  | 57   | 32   |
| 308 | 160  | 35  | 13  | 119  | 32  | 31  | 48  | 22  | 12  | 95   | 58   |
| 309 | 22   | 15  | 16  | 65   | 50  | 32  | 22  | 4   | 11  | 14   | 5    |
| 310 | 109  | 14  | 17  | 212  | 111 | 38  | 30  | 6   | 5   | 15   | 4    |
| 315 | 216  | 12  | 24  | 127  | 25  | 49  | 76  | 17  | 16  | 90   | 19   |
| 318 | 169  | 30  | 16  | 167  | 13  | 70  | 49  | 9   | 12  | 29   | 19   |
| 319 | 166  | 68  | 69  | 209  | 72  | 39  | 40  | 8   | 7   | 80   | 24   |
| 320 | 268  | 32  | 17  | 241  | 17  | 22  | 78  | 5   | 6   | 120  | 35   |
| 321 | 100  | 22  | 7   | 60   | 4   | 2   | 39  | 9   | 5   | 34   | 10   |
| 322 | 17   | 10  | 16  | 23   | 14  | 123 | 27  | 2   | 9   | 11   | 2    |
| 323 | 149  | 26  | 13  | 196  | 21  | 12  | 30  | 9   | 3   | 18   | 3    |
| 324 | 172  | 56  | 18  | 134  | 50  | 35  | 53  | 9   | 7   | 59   | 11   |
| 325 | 102  | 10  | 4   | 177  | 42  | 5   | 67  | 15  | 41  | 123  | 27   |
| 326 | 143  | 23  | 8   | 115  | 8   | 19  | 74  | 2   | 12  | 118  | 20   |
| 327 | 15   | 8   | 11  | 91   | 84  | 33  | 41  | 23  | 14  | 19   | 5    |
| 328 | 87   | 9   | 6   | 237  | 72  | 11  | 56  | 6   | 13  | 56   | 17   |
| 329 | 90   | 20  | 19  | 188  | 55  | 24  | 75  | 7   | 8   | 86   | 7    |
| 330 | 121  | 21  | 44  | 190  | 40  | 21  | 77  | 10  | 20  | 143  | 26   |
| 331 | 144  | 13  | 29  | 130  | 48  | 15  | 42  | 4   | 10  | 59   | 18   |
| 332 | 21   | 13  | 16  | 67   | 59  | 115 | 30  | 5   | 5   | 18   | 5    |
| 333 | 100  | 30  | 20  | 140  | 86  | 41  | 44  | 5   | 11  | 30   | 9    |

|     |       |      |      |       |      |      |      |     |    |      |    |
|-----|-------|------|------|-------|------|------|------|-----|----|------|----|
| 334 | 111   | 51   | 34   | 107   | 49   | 19   | 49   | 10  | 3  | 60   | 18 |
| 335 | 99    | 30   | 20   | 63    | 8    | 13   | 39   | 5   | 5  | 104  | 40 |
| 359 | 91    | 9    | 27   | 101   | 23   | 14   | 37   | 0   | 5  | 49   | 11 |
| 360 | 28    | 21   | 52   | 16    | 11   | 59   | 33   | 8   | 8  | 13   | 4  |
| 361 | 178   | 22   | 11   | 163   | 64   | 35   | 62   | 6   | 8  | 23   | 7  |
| 362 | 10913 | 3757 | 676  | 18898 | 1483 | 1615 | 1067 | 60  | 97 | 597  | 37 |
| 363 | 430   | 70   | 43   | 911   | 134  | 162  | 162  | 17  | 37 | 265  | 18 |
| 364 | 1619  | 59   | 182  | 1506  | 30   | 69   | 1376 | 117 | 30 | 1353 | 47 |
| 365 | 158   | 100  | 36   | 275   | 142  | 53   | 33   | 5   | 8  | 16   | 2  |
| 366 | 54    | 19   | 13   | 206   | 93   | 59   | 38   | 10  | 10 | 23   | 7  |
| 368 | 158   | 32   | 74   | 106   | 16   | 16   | 38   | 23  | 16 | 57   | 27 |
| 369 | 308   | 63   | 44   | 954   | 157  | 137  | 23   | 9   | 16 | 67   | 21 |
| 371 | 60    | 39   | 13   | 84    | 68   | 50   | 32   | 5   | 6  | 12   | 2  |
| 372 | 247   | 32   | 33   | 293   | 103  | 14   | 126  | 15  | 12 | 105  | 34 |
| 373 | 84    | 23   | 24   | 120   | 46   | 20   | 45   | 8   | 15 | 34   | 17 |
| 374 | 119   | 47   | 23   | 116   | 30   | 10   | 32   | 2   | 6  | 57   | 36 |
| 375 | 458   | 150  | 9    | 105   | 39   | 38   | 39   | 10  | 4  | 543  | 18 |
| 376 | 16    | 5    | 5    | 66    | 51   | 54   | 27   | 6   | 5  | 8    | 2  |
| 377 | 48    | 15   | 5    | 147   | 49   | 46   | 31   | 11  | 7  | 10   | 3  |
| 378 | 198   | 52   | 16   | 114   | 48   | 24   | 36   | 5   | 3  | 36   | 3  |
| 379 | 47    | 12   | 8    | 88    | 31   | 14   | 28   | 5   | 12 | 23   | 3  |
| 380 | 225   | 26   | 58   | 102   | 37   | 7    | 36   | 10  | 5  | 70   | 16 |
| 381 | 112   | 31   | 18   | 76    | 22   | 66   | 55   | 21  | 9  | 16   | 4  |
| 382 | 45    | 5    | 0    | 159   | 37   | 53   | 50   | 13  | 4  | 31   | 12 |
| 383 | 57    | 9    | 9    | 139   | 39   | 33   | 64   | 7   | 6  | 47   | 8  |
| 384 | 93    | 26   | 74   | 108   | 10   | 20   | 46   | 10  | 30 | 48   | 15 |
| 386 | 176   | 103  | 42   | 109   | 75   | 30   | 51   | 11  | 10 | 21   | 8  |
| 387 | 277   | 58   | 29   | 168   | 45   | 61   | 124  | 16  | 21 | 17   | 5  |
| 388 | 167   | 25   | 22   | 164   | 41   | 22   | 48   | 9   | 7  | 56   | 11 |
| 389 | 1064  | 80   | 58   | 172   | 48   | 16   | 38   | 1   | 8  | 67   | 25 |
| 390 | 62    | 13   | 4    | 76    | 17   | 13   | 53   | 8   | 13 | 69   | 13 |
| 392 | 11521 | 1278 | 3651 | 11578 | 426  | 2815 | 1220 | 136 | 80 | 932  | 93 |
| 394 | 112   | 24   | 16   | 182   | 18   | 10   | 115  | 29  | 9  | 160  | 30 |
| 395 | 195   | 11   | 21   | 327   | 57   | 50   | 132  | 14  | 3  | 111  | 37 |
| 396 | 486   | 26   | 16   | 5840  | 480  | 1894 | 334  | 9   | 45 | 1085 | 28 |
| 397 | 48    | 34   | 71   | 125   | 61   | 41   | 106  | 23  | 15 | 34   | 6  |
| 398 | 161   | 15   | 29   | 530   | 48   | 89   | 105  | 21  | 8  | 72   | 17 |
| 399 | 149   | 9    | 30   | 85    | 9    | 63   | 32   | 3   | 9  | 95   | 5  |
| 401 | 82    | 8    | 12   | 79    | 23   | 21   | 27   | 5   | 1  | 29   | 6  |
| 402 | 139   | 44   | 29   | 135   | 74   | 92   | 28   | 5   | 5  | 16   | 6  |
| 403 | 57    | 8    | 15   | 138   | 66   | 16   | 36   | 5   | 10 | 15   | 5  |
| 419 | 76    | 23   | 19   | 134   | 42   | 39   | 29   | 12  | 5  | 37   | 7  |
| 420 | 132   | 43   | 42   | 85    | 11   | 3    | 39   | 23  | 21 | 51   | 18 |
| 423 | 174   | 72   | 21   | 185   | 64   | 76   | 49   | 16  | 24 | 32   | 6  |
| 425 | 191   | 23   | 16   | 138   | 36   | 34   | 35   | 9   | 8  | 40   | 12 |
| 426 | 67    | 16   | 44   | 112   | 29   | 13   | 43   | 13  | 12 | 97   | 34 |
| 428 | 72    | 31   | 6    | 78    | 27   | 46   | 46   | 15  | 6  | 18   | 6  |
| 429 | 116   | 21   | 20   | 151   | 44   | 47   | 40   | 9   | 8  | 22   | 5  |
| 431 | 128   | 44   | 50   | 86    | 10   | 22   | 77   | 24  | 5  | 110  | 40 |
| 432 | 161   | 35   | 39   | 78    | 27   | 51   | 55   | 9   | 5  | 58   | 7  |

|      |      |      |      |       |      |      |      |     |     |      |     |
|------|------|------|------|-------|------|------|------|-----|-----|------|-----|
| 433  | 52   | 3    | 3    | 65    | 29   | 72   | 29   | 3   | 8   | 10   | 4   |
| 434  | 59   | 30   | 11   | 181   | 66   | 24   | 51   | 12  | 12  | 26   | 0   |
| 435  | 161  | 20   | 10   | 137   | 31   | 22   | 91   | 15  | 10  | 89   | 28  |
| 436  | 139  | 25   | 17   | 108   | 33   | 10   | 52   | 9   | 7   | 101  | 31  |
| 437  | 9523 | 438  | 1327 | 8155  | 224  | 1434 | 1516 | 65  | 107 | 717  | 91  |
| 479  | 32   | 7    | 10   | 52    | 7    | 34   | 37   | 4   | 25  | 14   | 5   |
| 480  | 436  | 11   | 19   | 542   | 27   | 76   | 193  | 14  | 6   | 185  | 45  |
| 481  | 369  | 10   | 21   | 400   | 28   | 89   | 279  | 51  | 18  | 269  | 3   |
| 483  | 99   | 19   | 16   | 103   | 15   | 10   | 53   | 6   | 37  | 62   | 8   |
| 492  | 65   | 10   | 7    | 44    | 10   | 47   | 40   | 11  | 11  | 49   | 10  |
| 493  | 111  | 44   | 29   | 871   | 194  | 84   | 120  | 86  | 87  | 340  | 82  |
| 495  | 38   | 7    | 11   | 53    | 12   | 77   | 30   | 9   | 13  | 15   | 7   |
| 496  | 68   | 10   | 4    | 86    | 18   | 33   | 62   | 11  | 20  | 76   | 13  |
| 497  | 259  | 40   | 59   | 405   | 19   | 46   | 150  | 7   | 14  | 199  | 11  |
| 498  | 61   | 6    | 57   | 65    | 31   | 36   | 33   | 12  | 5   | 28   | 4   |
| 499  | 74   | 11   | 18   | 69    | 29   | 33   | 29   | 3   | 1   | 11   | 4   |
| 501  | 562  | 366  | 73   | 172   | 68   | 34   | 42   | 4   | 13  | 20   | 6   |
| 502  | 52   | 12   | 6    | 128   | 23   | 39   | 40   | 9   | 13  | 52   | 20  |
| 503  | 195  | 27   | 42   | 3400  | 979  | 398  | 1745 | 521 | 113 | 1842 | 470 |
| 504  | 119  | 17   | 6    | 60    | 14   | 8    | 65   | 18  | 18  | 42   | 7   |
| 505  | 74   | 16   | 21   | 120   | 66   | 24   | 54   | 11  | 13  | 19   | 7   |
| 506  | 294  | 8    | 36   | 383   | 55   | 45   | 213  | 6   | 6   | 130  | 20  |
| 527  | 97   | 17   | 11   | 112   | 37   | 73   | 36   | 12  | 9   | 26   | 8   |
| 528  | 131  | 13   | 33   | 105   | 17   | 10   | 41   | 12  | 9   | 66   | 16  |
| 529  | 74   | 14   | 8    | 58    | 10   | 75   | 63   | 17  | 7   | 67   | 10  |
| 530  | 86   | 12   | 24   | 64    | 29   | 66   | 42   | 10  | 13  | 14   | 4   |
| 531  | 102  | 16   | 8    | 145   | 74   | 82   | 60   | 8   | 8   | 44   | 13  |
| 534  | 180  | 20   | 21   | 74    | 12   | 7    | 30   | 1   | 5   | 40   | 5   |
| 535  | 40   | 9    | 5    | 101   | 76   | 42   | 35   | 9   | 10  | 14   | 5   |
| 536  | 119  | 27   | 13   | 151   | 30   | 98   | 65   | 12  | 5   | 31   | 9   |
| 537  | 121  | 9    | 9    | 98    | 28   | 18   | 64   | 8   | 2   | 71   | 12  |
| 538  | 116  | 9    | 10   | 185   | 39   | 36   | 75   | 8   | 31  | 135  | 15  |
| 539  | 102  | 28   | 19   | 144   | 10   | 26   | 70   | 8   | 7   | 125  | 10  |
| 540  | 24   | 9    | 6    | 36    | 13   | 44   | 34   | 7   | 17  | 13   | 4   |
| 541  | 90   | 3    | 10   | 241   | 50   | 30   | 55   | 10  | 5   | 83   | 27  |
| 542  | 75   | 11   | 22   | 137   | 31   | 36   | 55   | 16  | 1   | 70   | 10  |
| 625  | 85   | 10   | 9    | 362   | 71   | 156  | 46   | 12  | 5   | 53   | 17  |
| 627  | 93   | 16   | 5    | 130   | 21   | 25   | 72   | 13  | 11  | 73   | 10  |
| 800  | 220  | 11   | 27   | 83    | 21   | 44   | 42   | 10  | 4   | 177  | 28  |
| 801  | 141  | 17   | 28   | 113   | 36   | 81   | 42   | 6   | 9   | 26   | 5   |
| 900  | 58   | 9    | 43   | 77    | 34   | 116  | 28   | 4   | 8   | 30   | 7   |
| 1001 | 34   | 6    | 2    | 78    | 24   | 76   | 48   | 20  | 9   | 21   | 7   |
| 1002 | 141  | 14   | 11   | 169   | 88   | 72   | 120  | 12  | 38  | 1597 | 226 |
| 1003 | 93   | 21   | 31   | 134   | 27   | 33   | 72   | 20  | 9   | 113  | 9   |
| 1004 | 4320 | 1141 | 803  | 6545  | 781  | 1488 | 888  | 113 | 106 | 1234 | 262 |
| 1005 | 78   | 13   | 8    | 142   | 33   | 17   | 121  | 1   | 17  | 148  | 34  |
| 1006 | 30   | 4    | 6    | 58    | 40   | 57   | 44   | 4   | 11  | 17   | 6   |
| 1007 | 52   | 3    | 14   | 107   | 44   | 152  | 53   | 18  | 41  | 40   | 14  |
| 1008 | 7746 | 505  | 271  | 26749 | 1345 | 1112 | 360  | 27  | 27  | 2549 | 67  |
| 1009 | 1708 | 473  | 100  | 1031  | 283  | 268  | 68   | 4   | 6   | 267  | 32  |

|      |       |      |      |       |      |      |       |      |      |       |      |
|------|-------|------|------|-------|------|------|-------|------|------|-------|------|
| 1010 | 488   | 41   | 15   | 2168  | 239  | 197  | 3500  | 189  | 447  | 599   | 16   |
| 1011 | 48    | 14   | 18   | 128   | 47   | 59   | 33    | 7    | 3    | 18    | 8    |
| 1012 | 174   | 14   | 24   | 377   | 70   | 208  | 68    | 19   | 31   | 42    | 18   |
| 1013 | 163   | 8    | 27   | 303   | 62   | 33   | 92    | 25   | 15   | 7621  | 2005 |
| 1014 | 79    | 2    | 16   | 189   | 61   | 57   | 102   | 54   | 42   | 103   | 40   |
| 1015 | 139   | 4    | 14   | 554   | 44   | 26   | 85    | 25   | 11   | 100   | 40   |
| 1016 | 181   | 31   | 8    | 128   | 41   | 48   | 54    | 21   | 6    | 42    | 16   |
| 1017 | 72    | 6    | 2    | 222   | 75   | 63   | 51    | 11   | 13   | 22    | 4    |
| 1018 | 502   | 37   | 61   | 372   | 84   | 29   | 601   | 138  | 49   | 97    | 46   |
| 1019 | 94    | 17   | 19   | 1164  | 193  | 172  | 126   | 70   | 37   | 148   | 52   |
| 1020 | 77    | 19   | 3    | 103   | 24   | 51   | 75    | 11   | 5    | 89    | 10   |
| 1021 | 81    | 16   | 21   | 929   | 199  | 249  | 86    | 14   | 41   | 26    | 8    |
| 1022 | 51    | 7    | 7    | 157   | 47   | 41   | 58    | 22   | 5    | 31    | 8    |
| 1023 | 77    | 4    | 5    | 187   | 40   | 43   | 62    | 9    | 18   | 69    | 19   |
| 1024 | 141   | 14   | 17   | 200   | 30   | 26   | 97    | 13   | 43   | 92    | 25   |
| 1025 | 68    | 10   | 24   | 181   | 12   | 15   | 259   | 28   | 22   | 90    | 15   |
| 1026 | 121   | 12   | 35   | 126   | 51   | 38   | 56    | 11   | 41   | 18    | 8    |
| 1027 | 343   | 36   | 69   | 314   | 73   | 35   | 85    | 5    | 11   | 42    | 7    |
| 1201 | 82    | 31   | 12   | 127   | 26   | 81   | 51    | 7    | 8    | 76    | 18   |
| 1202 | 180   | 8    | 21   | 172   | 55   | 63   | 98    | 25   | 49   | 107   | 27   |
| 1203 | 62    | 10   | 34   | 133   | 60   | 89   | 69    | 12   | 44   | 110   | 21   |
| 1204 | 1067  | 166  | 105  | 757   | 83   | 67   | 392   | 131  | 32   | 189   | 47   |
| 1205 | 84    | 9    | 21   | 226   | 93   | 59   | 64    | 7    | 13   | 39    | 14   |
| 1206 | 221   | 95   | 159  | 270   | 126  | 132  | 69    | 3    | 8    | 101   | 29   |
| 1207 | 79    | 4    | 24   | 159   | 40   | 53   | 86    | 8    | 59   | 75    | 15   |
| 1208 | 35927 | 437  | 1202 | 43580 | 1692 | 1125 | 13738 | 684  | 445  | 44000 | 3514 |
| 1209 | 44    | 8    | 4    | 101   | 59   | 61   | 45    | 9    | 4    | 17    | 5    |
| 1210 | 49    | 6    | 6    | 117   | 49   | 68   | 54    | 17   | 23   | 30    | 7    |
| 1211 | 89    | 15   | 14   | 136   | 25   | 26   | 180   | 18   | 7    | 83    | 6    |
| 1212 | 278   | 21   | 31   | 1334  | 160  | 252  | 894   | 62   | 48   | 306   | 32   |
| 1213 | 114   | 20   | 33   | 136   | 18   | 36   | 74    | 29   | 32   | 148   | 27   |
| 1214 | 55    | 4    | 6    | 97    | 56   | 70   | 38    | 7    | 3    | 14    | 3    |
| 1215 | 67    | 15   | 19   | 269   | 92   | 75   | 67    | 36   | 16   | 45    | 11   |
| 1216 | 69    | 17   | 21   | 117   | 24   | 41   | 61    | 13   | 16   | 32204 | 2075 |
| 1217 | 1662  | 381  | 214  | 1005  | 175  | 118  | 988   | 122  | 14   | 728   | 35   |
| 1218 | 149   | 62   | 151  | 338   | 29   | 46   | 49    | 11   | 30   | 232   | 37   |
| 1219 | 143   | 35   | 14   | 650   | 90   | 82   | 141   | 53   | 37   | 138   | 43   |
| 1220 | 29080 | 2987 | 1849 | 35445 | 3838 | 2082 | 5218  | 951  | 568  | 5614  | 1325 |
| 1221 | 108   | 17   | 37   | 152   | 42   | 42   | 86    | 44   | 6    | 74    | 53   |
| 1222 | 1034  | 261  | 239  | 9367  | 1303 | 3298 | 10571 | 2964 | 2139 | 1715  | 513  |
| 1223 | 58    | 34   | 21   | 134   | 28   | 35   | 80    | 26   | 6    | 99    | 20   |
| 1224 | 56    | 14   | 17   | 126   | 23   | 70   | 42    | 2    | 8    | 26    | 13   |
| 1225 | 162   | 25   | 11   | 370   | 114  | 53   | 80    | 7    | 22   | 113   | 46   |
| 1226 | 69    | 11   | 11   | 195   | 45   | 30   | 62    | 30   | 16   | 75    | 34   |
| 1230 | 68    | 13   | 6    | 119   | 12   | 22   | 54    | 7    | 46   | 80    | 39   |
| 1231 | 54    | 21   | 12   | 109   | 29   | 48   | 66    | 11   | 17   | 115   | 17   |
| 1232 | 1688  | 310  | 210  | 175   | 37   | 36   | 11486 | 5009 | 1738 | 50    | 29   |
| 1233 | 226   | 74   | 19   | 6013  | 1009 | 223  | 6160  | 128  | 327  | 500   | 60   |
| 1234 | 50    | 2    | 10   | 178   | 41   | 25   | 78    | 16   | 14   | 63    | 13   |
| 1238 | 35    | 11   | 5    | 120   | 52   | 50   | 53    | 1    | 3    | 15    | 4    |

|      |      |     |     |       |      |      |      |     |     |      |     |
|------|------|-----|-----|-------|------|------|------|-----|-----|------|-----|
| 1239 | 69   | 12  | 10  | 146   | 69   | 47   | 53   | 12  | 15  | 39   | 11  |
| 1240 | 83   | 17  | 15  | 277   | 83   | 27   | 97   | 10  | 11  | 118  | 27  |
| 1241 | 90   | 24  | 32  | 143   | 59   | 101  | 127  | 17  | 24  | 120  | 19  |
| 1401 | 125  | 42  | 7   | 495   | 55   | 79   | 78   | 14  | 36  | 122  | 7   |
| 1402 | 39   | 8   | 4   | 113   | 72   | 58   | 42   | 5   | 12  | 20   | 6   |
| 1403 | 514  | 45  | 479 | 368   | 53   | 117  | 75   | 22  | 56  | 70   | 21  |
| 1404 | 69   | 10  | 3   | 168   | 55   | 24   | 49   | 2   | 14  | 60   | 4   |
| 1405 | 206  | 20  | 20  | 606   | 31   | 97   | 378  | 25  | 84  | 209  | 29  |
| 1406 | 108  | 34  | 18  | 1432  | 49   | 167  | 126  | 15  | 26  | 874  | 37  |
| 1407 | 35   | 7   | 8   | 2313  | 340  | 58   | 44   | 7   | 24  | 19   | 6   |
| 1408 | 63   | 12  | 11  | 135   | 78   | 57   | 38   | 5   | 17  | 25   | 10  |
| 1409 | 58   | 5   | 6   | 143   | 58   | 17   | 39   | 7   | 8   | 60   | 7   |
| 1410 | 73   | 4   | 3   | 110   | 31   | 17   | 67   | 15  | 24  | 50   | 15  |
| 1412 | 77   | 21  | 8   | 82    | 13   | 14   | 41   | 4   | 4   | 55   | 4   |
| 1413 | 542  | 45  | 31  | 272   | 163  | 25   | 40   | 10  | 5   | 16   | 5   |
| 1416 | 228  | 21  | 20  | 10464 | 1609 | 1088 | 84   | 16  | 18  | 392  | 21  |
| 1418 | 107  | 20  | 30  | 174   | 14   | 3    | 1831 | 117 | 77  | 8907 | 237 |
| 1501 | 182  | 60  | 34  | 455   | 29   | 14   | 441  | 17  | 46  | 178  | 8   |
| 1601 | 324  | 104 | 88  | 402   | 46   | 73   | 171  | 27  | 19  | 188  | 23  |
| 1602 | 47   | 10  | 6   | 411   | 77   | 94   | 61   | 25  | 11  | 13   | 3   |
| 1603 | 607  | 132 | 38  | 3931  | 332  | 170  | 127  | 29  | 18  | 76   | 29  |
| 1605 | 76   | 8   | 20  | 123   | 45   | 73   | 76   | 37  | 29  | 109  | 55  |
| 1606 | 1299 | 979 | 385 | 1508  | 602  | 87   | 155  | 62  | 20  | 669  | 146 |
| 1607 | 257  | 44  | 142 | 114   | 12   | 79   | 85   | 11  | 35  | 38   | 18  |
| 1608 | 69   | 34  | 8   | 239   | 71   | 38   | 59   | 13  | 7   | 45   | 18  |
| 1609 | 140  | 38  | 37  | 291   | 65   | 32   | 103  | 71  | 30  | 15   | 4   |
| 1610 | 1263 | 226 | 232 | 18771 | 2269 | 5012 | 508  | 144 | 76  | 494  | 209 |
| 1611 | 57   | 34  | 9   | 166   | 35   | 12   | 145  | 54  | 8   | 183  | 31  |
| 1613 | 720  | 9   | 47  | 1350  | 143  | 73   | 400  | 11  | 24  | 3059 | 357 |
| 1614 | 727  | 13  | 18  | 225   | 40   | 119  | 187  | 21  | 52  | 1666 | 239 |
| 1615 | 74   | 2   | 14  | 111   | 10   | 45   | 100  | 11  | 54  | 121  | 49  |
| 1616 | 57   | 18  | 19  | 113   | 47   | 39   | 69   | 23  | 24  | 94   | 9   |
| 1617 | 44   | 6   | 8   | 150   | 51   | 13   | 40   | 10  | 13  | 16   | 4   |
| 1618 | 44   | 4   | 6   | 125   | 42   | 32   | 59   | 15  | 14  | 35   | 8   |
| 1701 | 68   | 13  | 7   | 185   | 46   | 38   | 64   | 17  | 9   | 77   | 8   |
| 1702 | 87   | 13  | 12  | 130   | 24   | 94   | 64   | 12  | 30  | 73   | 7   |
| 1703 | 63   | 15  | 16  | 131   | 46   | 15   | 68   | 21  | 28  | 114  | 32  |
| 1705 | 384  | 176 | 130 | 1285  | 557  | 360  | 352  | 127 | 105 | 616  | 157 |
| 1706 | 99   | 16  | 15  | 266   | 49   | 26   | 66   | 20  | 27  | 52   | 13  |
| 1707 | 83   | 14  | 12  | 168   | 69   | 35   | 97   | 12  | 13  | 93   | 8   |
| 1801 | 103  | 4   | 42  | 128   | 18   | 16   | 670  | 56  | 227 | 517  | 39  |
| 1802 | 83   | 57  | 10  | 112   | 41   | 29   | 95   | 11  | 14  | 96   | 19  |
| 1804 | 414  | 111 | 61  | 1091  | 158  | 268  | 387  | 40  | 206 | 110  | 38  |
| 1806 | 59   | 12  | 5   | 151   | 79   | 43   | 65   | 19  | 11  | 36   | 9   |
| 1807 | 53   | 2   | 7   | 174   | 56   | 7    | 86   | 3   | 7   | 95   | 15  |
| 1808 | 110  | 8   | 18  | 167   | 31   | 20   | 83   | 11  | 31  | 107  | 16  |
| 1809 | 64   | 22  | 16  | 124   | 35   | 66   | 91   | 15  | 14  | 121  | 13  |
| 1810 | 51   | 4   | 14  | 114   | 56   | 66   | 50   | 11  | 11  | 24   | 6   |
| 2001 | 53   | 16  | 19  | 132   | 77   | 55   | 58   | 17  | 19  | 45   | 19  |
| 2002 | 68   | 7   | 7   | 128   | 26   | 53   | 82   | 30  | 11  | 84   | 21  |

|      |      |      |      |       |     |     |      |      |     |      |     |
|------|------|------|------|-------|-----|-----|------|------|-----|------|-----|
| 2003 | 81   | 13   | 14   | 105   | 19  | 43  | 109  | 10   | 60  | 111  | 47  |
| 2004 | 69   | 23   | 10   | 551   | 104 | 60  | 286  | 60   | 41  | 280  | 21  |
| 2005 | 36   | 4    | 4    | 126   | 63  | 85  | 45   | 16   | 14  | 21   | 4   |
| 2006 | 316  | 48   | 22   | 13669 | 979 | 900 | 143  | 54   | 10  | 81   | 24  |
| 2007 | 99   | 11   | 12   | 9624  | 539 | 979 | 408  | 127  | 36  | 68   | 54  |
| 2008 | 85   | 30   | 17   | 109   | 20  | 39  | 79   | 39   | 35  | 91   | 51  |
| 2009 | 54   | 30   | 24   | 177   | 30  | 26  | 74   | 41   | 27  | 113  | 25  |
| 2010 | 48   | 11   | 6    | 137   | 58  | 55  | 51   | 3    | 7   | 29   | 9   |
| 2011 | 64   | 12   | 7    | 174   | 58  | 39  | 57   | 8    | 30  | 47   | 16  |
| 2012 | 77   | 12   | 7    | 304   | 54  | 65  | 92   | 48   | 12  | 73   | 54  |
| 2013 | 77   | 8    | 11   | 285   | 75  | 114 | 109  | 42   | 36  | 125  | 48  |
| 2101 | 2355 | 1998 | 831  | 9527  | 752 | 253 | 6119 | 1393 | 620 | 892  | 110 |
| 2102 | 64   | 16   | 10   | 273   | 48  | 147 | 71   | 16   | 7   | 27   | 7   |
| 2103 | 75   | 14   | 2    | 289   | 114 | 85  | 106  | 12   | 19  | 50   | 21  |
| 2104 | 101  | 11   | 3    | 287   | 37  | 18  | 75   | 26   | 34  | 81   | 28  |
| 2105 | 1056 | 113  | 249  | 1610  | 127 | 108 | 266  | 66   | 15  | 269  | 90  |
| 2106 | 393  | 191  | 88   | 196   | 39  | 30  | 412  | 190  | 42  | 928  | 167 |
| 2107 | 654  | 188  | 34   | 205   | 64  | 10  | 96   | 34   | 44  | 22   | 8   |
| 2201 | 63   | 2    | 16   | 163   | 61  | 70  | 73   | 20   | 30  | 52   | 13  |
| 2202 | 65   | 14   | 7    | 171   | 33  | 47  | 64   | 17   | 25  | 72   | 8   |
| 2203 | 109  | 16   | 22   | 131   | 36  | 31  | 79   | 14   | 51  | 142  | 31  |
| 2204 | 74   | 23   | 9    | 119   | 20  | 23  | 65   | 13   | 6   | 87   | 13  |
| 2205 | 166  | 19   | 12   | 523   | 64  | 66  | 190  | 24   | 33  | 72   | 24  |
| 2206 | 90   | 16   | 18   | 180   | 57  | 41  | 69   | 12   | 17  | 54   | 9   |
| 2207 | 161  | 7    | 7    | 183   | 36  | 39  | 118  | 18   | 9   | 125  | 24  |
| 2208 | 169  | 10   | 8    | 127   | 10  | 8   | 79   | 19   | 94  | 113  | 17  |
| 2209 | 7485 | 3090 | 197  | 474   | 378 | 105 | 109  | 3    | 10  | 2219 | 83  |
| 2210 | 8763 | 1722 | 1183 | 874   | 100 | 288 | 79   | 3    | 1   | 1123 | 298 |
| 2211 | 410  | 139  | 215  | 162   | 71  | 94  | 66   | 21   | 23  | 85   | 13  |
| 2212 | 165  | 12   | 7    | 154   | 30  | 51  | 89   | 9    | 8   | 116  | 13  |
| 3001 | 88   | 9    | 14   | 145   | 75  | 61  | 79   | 26   | 9   | 37   | 20  |
| 3301 | 70   | 11   | 25   | 149   | 50  | 72  | 68   | 8    | 18  | 52   | 15  |
| 3302 | 86   | 5    | 21   | 88    | 3   | 28  | 62   | 12   | 14  | 63   | 10  |
| 3401 | 93   | 31   | 33   | 111   | 7   | 18  | 97   | 10   | 4   | 115  | 29  |
| 9001 | 126  | 57   | 45   | 174   | 48  | 107 | 173  | 33   | 52  | 212  | 29  |
| 9002 | 54   | 14   | 28   | 113   | 21  | 79  | 48   | 22   | 6   | 23   | 10  |
| 9003 | 68   | 9    | 10   | 149   | 9   | 25  | 77   | 52   | 37  | 108  | 5   |

Supplementary Table 3.9 represents all fluorescent signals (0-65535 RFU, relative fluorescent units) for groups conventional control mice, CD 1 male mice fed with standard granulated food

| Mouse ID | 9.1    |        |        | 9.2    |        |        | 9.3    |        |        | 9.4    |        |
|----------|--------|--------|--------|--------|--------|--------|--------|--------|--------|--------|--------|
| Nr       | Median | -1st Q | +3rd Q | Median | -1st Q | +3rd Q | Median | -1st Q | +3rd Q | Median | -1st Q |
| 001      | 238    | 55     | 76     | 5294   | 3953   | 931    | 400    | 223    | 250    | 1946   | 1117   |
| 002      | 269    | 107    | 311    | 474    | 268    | 233    | 642    | 294    | 554    | 1420   | 967    |
| 003      | 348    | 233    | 109    | 196    | 77     | 435    | 466    | 78     | 244    | 497    | 109    |
| 004      | 161    | 29     | 10     | 280    | 132    | 178    | 357    | 109    | 615    | 545    | 362    |
| 005      | 990    | 342    | 270    | 233    | 125    | 11     | 437    | 130    | 2637   | 682    | 102    |
| 006      | 118    | 16     | 236    | 58     | 6      | 26     | 178    | 73     | 67     | 376    | 116    |
| 007      | 316    | 89     | 153    | 194    | 28     | 31     | 243    | 23     | 69     | 281    | 68     |
| 009      | 292    | 73     | 37     | 224    | 7      | 20     | 299    | 23     | 9      | 495    | 119    |
| 010      | 230    | 42     | 59     | 188    | 22     | 61     | 264    | 29     | 26     | 389    | 113    |

|     |      |      |      |      |     |     |      |     |       |      |      |
|-----|------|------|------|------|-----|-----|------|-----|-------|------|------|
| 011 | 268  | 30   | 101  | 380  | 16  | 52  | 244  | 111 | 260   | 529  | 210  |
| 012 | 382  | 158  | 148  | 424  | 48  | 245 | 252  | 46  | 35    | 400  | 104  |
| 013 | 110  | 2    | 17   | 424  | 8   | 82  | 180  | 62  | 8     | 334  | 102  |
| 014 | 310  | 102  | 89   | 146  | 10  | 72  | 396  | 108 | 9869  | 338  | 95   |
| 015 | 80   | 21   | 18   | 53   | 18  | 30  | 122  | 10  | 59    | 74   | 28   |
| 016 | 88   | 12   | 82   | 44   | 24  | 34  | 167  | 20  | 129   | 138  | 30   |
| 017 | 400  | 119  | 38   | 186  | 65  | 69  | 286  | 44  | 30    | 2052 | 1367 |
| 018 | 302  | 186  | 82   | 437  | 153 | 73  | 504  | 277 | 258   | 1388 | 808  |
| 019 | 252  | 138  | 134  | 422  | 168 | 276 | 946  | 512 | 228   | 1737 | 1025 |
| 020 | 1709 | 805  | 268  | 469  | 183 | 176 | 1231 | 419 | 294   | 1450 | 604  |
| 021 | 132  | 44   | 196  | 147  | 58  | 681 | 288  | 80  | 77    | 363  | 247  |
| 022 | 358  | 66   | 175  | 164  | 42  | 65  | 258  | 71  | 165   | 579  | 133  |
| 023 | 332  | 102  | 23   | 232  | 90  | 64  | 240  | 51  | 20    | 303  | 9    |
| 024 | 206  | 88   | 161  | 242  | 49  | 20  | 246  | 74  | 221   | 3322 | 1748 |
| 025 | 564  | 140  | 156  | 108  | 50  | 87  | 260  | 75  | 5     | 376  | 44   |
| 026 | 415  | 148  | 114  | 164  | 42  | 128 | 323  | 81  | 12    | 432  | 81   |
| 027 | 152  | 38   | 145  | 106  | 47  | 50  | 192  | 48  | 34    | 288  | 102  |
| 037 | 204  | 82   | 158  | 201  | 55  | 36  | 198  | 52  | 101   | 308  | 20   |
| 038 | 322  | 24   | 25   | 698  | 530 | 535 | 370  | 109 | 855   | 2070 | 1412 |
| 043 | 164  | 55   | 56   | 634  | 171 | 754 | 633  | 388 | 833   | 1316 | 789  |
| 044 | 188  | 92   | 248  | 707  | 395 | 875 | 486  | 210 | 85    | 861  | 257  |
| 045 | 326  | 92   | 70   | 902  | 589 | 323 | 373  | 91  | 143   | 1044 | 822  |
| 046 | 110  | 24   | 91   | 336  | 135 | 370 | 274  | 76  | 141   | 496  | 369  |
| 047 | 196  | 74   | 48   | 354  | 232 | 607 | 266  | 44  | 244   | 1162 | 692  |
| 048 | 183  | 68   | 53   | 268  | 216 | 336 | 174  | 27  | 567   | 400  | 179  |
| 049 | 280  | 119  | 122  | 765  | 512 | 214 | 378  | 209 | 176   | 1016 | 732  |
| 050 | 178  | 64   | 39   | 308  | 61  | 520 | 341  | 42  | 14    | 1058 | 798  |
| 051 | 167  | 59   | 77   | 476  | 32  | 234 | 258  | 27  | 213   | 536  | 354  |
| 052 | 226  | 32   | 28   | 66   | 40  | 290 | 172  | 16  | 678   | 279  | 177  |
| 053 | 120  | 26   | 126  | 695  | 423 | 309 | 498  | 170 | 99    | 344  | 193  |
| 054 | 208  | 119  | 122  | 788  | 368 | 337 | 274  | 98  | 213   | 1314 | 737  |
| 055 | 6034 | 2106 | 2880 | 5556 | 154 | 112 | 2641 | 335 | 703   | 4670 | 1114 |
| 071 | 259  | 27   | 69   | 267  | 31  | 31  | 285  | 37  | 235   | 181  | 9    |
| 072 | 127  | 19   | 9    | 115  | 31  | 19  | 363  | 268 | 504   | 188  | 32   |
| 073 | 492  | 87   | 68   | 1975 | 105 | 115 | 158  | 1   | 7     | 540  | 219  |
| 074 | 198  | 39   | 185  | 459  | 27  | 17  | 322  | 100 | 48916 | 506  | 85   |
| 075 | 113  | 0    | 66   | 162  | 45  | 54  | 336  | 140 | 332   | 864  | 616  |
| 076 | 140  | 42   | 49   | 368  | 182 | 30  | 348  | 78  | 410   | 614  | 421  |
| 077 | 117  | 11   | 265  | 230  | 67  | 69  | 228  | 37  | 144   | 294  | 4    |
| 078 | 336  | 81   | 85   | 103  | 24  | 5   | 181  | 8   | 9     | 243  | 45   |
| 080 | 176  | 14   | 15   | 147  | 0   | 15  | 218  | 35  | 10    | 188  | 35   |
| 081 | 67   | 3    | 9    | 54   | 5   | 2   | 127  | 18  | 11    | 58   | 19   |
| 082 | 115  | 26   | 26   | 34   | 11  | 26  | 134  | 16  | 32    | 181  | 44   |
| 083 | 368  | 160  | 123  | 156  | 34  | 68  | 214  | 35  | 34    | 350  | 95   |
| 084 | 157  | 14   | 15   | 185  | 48  | 19  | 312  | 134 | 78    | 167  | 42   |
| 085 | 88   | 12   | 16   | 240  | 149 | 138 | 148  | 56  | 125   | 616  | 436  |
| 086 | 240  | 63   | 60   | 194  | 46  | 56  | 170  | 54  | 75    | 1010 | 458  |
| 087 | 314  | 78   | 91   | 424  | 55  | 62  | 266  | 117 | 170   | 418  | 115  |
| 088 | 147  | 17   | 37   | 127  | 68  | 88  | 178  | 35  | 21    | 144  | 35   |
| 089 | 76   | 2    | 16   | 56   | 18  | 7   | 115  | 6   | 17    | 66   | 7    |



|     |      |     |     |       |      |      |       |      |       |      |      |
|-----|------|-----|-----|-------|------|------|-------|------|-------|------|------|
| 092 | 376  | 195 | 105 | 294   | 38   | 24   | 176   | 39   | 270   | 335  | 35   |
| 093 | 118  | 12  | 9   | 378   | 224  | 249  | 236   | 14   | 144   | 372  | 96   |
| 094 | 166  | 57  | 36  | 496   | 374  | 1526 | 765   | 183  | 111   | 2888 | 1686 |
| 096 | 100  | 17  | 80  | 226   | 88   | 164  | 1618  | 1228 | 2094  | 3837 | 2276 |
| 097 | 252  | 91  | 81  | 282   | 96   | 76   | 189   | 45   | 37    | 312  | 34   |
| 098 | 134  | 24  | 36  | 644   | 5    | 119  | 148   | 20   | 110   | 259  | 79   |
| 099 | 96   | 20  | 70  | 342   | 18   | 17   | 109   | 18   | 38    | 192  | 120  |
| 100 | 296  | 75  | 115 | 172   | 78   | 54   | 314   | 37   | 50    | 424  | 152  |
| 101 | 100  | 14  | 41  | 43    | 3    | 15   | 140   | 18   | 35    | 179  | 36   |
| 102 | 100  | 10  | 47  | 90    | 45   | 31   | 170   | 65   | 56    | 162  | 50   |
| 103 | 120  | 10  | 4   | 63    | 8    | 5    | 106   | 3    | 31    | 150  | 16   |
| 104 | 426  | 49  | 35  | 211   | 21   | 65   | 208   | 84   | 26    | 411  | 16   |
| 105 | 142  | 45  | 40  | 62    | 18   | 43   | 185   | 17   | 25    | 268  | 12   |
| 106 | 108  | 43  | 20  | 343   | 18   | 43   | 125   | 23   | 12    | 170  | 79   |
| 107 | 115  | 18  | 22  | 1358  | 211  | 127  | 157   | 39   | 14    | 228  | 109  |
| 110 | 176  | 56  | 50  | 122   | 42   | 87   | 184   | 58   | 2     | 272  | 59   |
| 111 | 154  | 55  | 51  | 390   | 46   | 231  | 352   | 110  | 392   | 204  | 126  |
| 112 | 132  | 20  | 97  | 262   | 118  | 122  | 292   | 37   | 678   | 685  | 456  |
| 113 | 2202 | 396 | 358 | 80    | 13   | 10   | 628   | 322  | 696   | 520  | 364  |
| 114 | 398  | 289 | 277 | 248   | 168  | 18   | 158   | 25   | 27    | 316  | 36   |
| 115 | 281  | 123 | 112 | 2516  | 809  | 660  | 183   | 37   | 48    | 894  | 362  |
| 116 | 764  | 117 | 131 | 204   | 90   | 112  | 132   | 23   | 31    | 258  | 128  |
| 117 | 634  | 120 | 95  | 3704  | 723  | 812  | 166   | 58   | 59    | 1828 | 648  |
| 118 | 150  | 32  | 97  | 46    | 15   | 20   | 170   | 33   | 5     | 304  | 35   |
| 119 | 258  | 98  | 52  | 179   | 31   | 43   | 232   | 36   | 30    | 302  | 104  |
| 120 | 115  | 11  | 29  | 122   | 36   | 100  | 108   | 15   | 50    | 286  | 64   |
| 121 | 421  | 76  | 96  | 265   | 41   | 20   | 350   | 90   | 217   | 362  | 17   |
| 122 | 248  | 106 | 80  | 178   | 40   | 18   | 134   | 12   | 32    | 316  | 95   |
| 123 | 288  | 44  | 36  | 254   | 25   | 68   | 107   | 11   | 27    | 406  | 152  |
| 125 | 1680 | 362 | 348 | 15998 | 3283 | 2691 | 10880 | 4540 | 1948  | 7666 | 4597 |
| 126 | 540  | 86  | 120 | 966   | 61   | 360  | 963   | 495  | 499   | 809  | 329  |
| 127 | 147  | 52  | 23  | 346   | 231  | 251  | 360   | 124  | 335   | 825  | 517  |
| 128 | 1144 | 61  | 106 | 2034  | 380  | 324  | 2027  | 131  | 927   | 1253 | 532  |
| 129 | 142  | 27  | 262 | 380   | 249  | 287  | 1316  | 518  | 270   | 2034 | 1412 |
| 130 | 169  | 51  | 18  | 1950  | 343  | 318  | 322   | 40   | 108   | 599  | 110  |
| 131 | 570  | 93  | 126 | 3874  | 716  | 1152 | 1534  | 472  | 305   | 3060 | 846  |
| 132 | 144  | 21  | 73  | 74    | 18   | 16   | 169   | 31   | 49031 | 204  | 14   |
| 133 | 312  | 71  | 127 | 380   | 87   | 32   | 788   | 374  | 428   | 319  | 97   |
| 134 | 722  | 260 | 170 | 616   | 50   | 43   | 1088  | 416  | 493   | 544  | 120  |
| 135 | 206  | 29  | 157 | 326   | 88   | 37   | 358   | 113  | 438   | 368  | 119  |
| 136 | 224  | 65  | 31  | 466   | 100  | 66   | 200   | 35   | 22    | 306  | 44   |
| 137 | 363  | 100 | 80  | 500   | 102  | 112  | 154   | 39   | 40    | 380  | 64   |
| 138 | 320  | 127 | 69  | 344   | 44   | 44   | 164   | 16   | 38    | 259  | 46   |
| 139 | 118  | 48  | 89  | 1402  | 169  | 23   | 147   | 28   | 128   | 202  | 124  |
| 140 | 685  | 29  | 70  | 606   | 50   | 82   | 676   | 186  | 122   | 561  | 19   |
| 142 | 164  | 39  | 14  | 70    | 10   | 26   | 160   | 21   | 69    | 224  | 26   |
| 143 | 291  | 72  | 158 | 442   | 73   | 58   | 342   | 160  | 203   | 382  | 147  |
| 144 | 158  | 40  | 67  | 540   | 135  | 202  | 182   | 58   | 35    | 479  | 181  |
| 145 | 128  | 20  | 72  | 678   | 76   | 120  | 178   | 24   | 66    | 562  | 165  |
| 146 | 481  | 153 | 127 | 334   | 29   | 61   | 292   | 62   | 18    | 384  | 42   |

|     |      |      |     |      |     |     |      |      |      |      |      |
|-----|------|------|-----|------|-----|-----|------|------|------|------|------|
| 149 | 135  | 29   | 81  | 269  | 15  | 53  | 127  | 9    | 27   | 214  | 108  |
| 150 | 484  | 110  | 102 | 412  | 10  | 14  | 1354 | 396  | 316  | 280  | 9    |
| 151 | 206  | 20   | 19  | 357  | 95  | 75  | 132  | 5    | 49   | 223  | 22   |
| 152 | 236  | 138  | 134 | 280  | 38  | 228 | 592  | 379  | 401  | 462  | 251  |
| 153 | 198  | 66   | 112 | 398  | 142 | 53  | 290  | 96   | 346  | 441  | 241  |
| 154 | 923  | 11   | 211 | 510  | 148 | 308 | 1820 | 647  | 666  | 2250 | 177  |
| 156 | 281  | 80   | 85  | 376  | 91  | 264 | 346  | 75   | 52   | 720  | 356  |
| 158 | 240  | 67   | 122 | 329  | 55  | 39  | 222  | 100  | 426  | 180  | 40   |
| 159 | 115  | 33   | 61  | 297  | 123 | 43  | 140  | 26   | 29   | 156  | 63   |
| 160 | 265  | 66   | 226 | 290  | 140 | 43  | 182  | 10   | 16   | 314  | 123  |
| 161 | 144  | 48   | 64  | 233  | 42  | 51  | 142  | 30   | 105  | 291  | 99   |
| 162 | 304  | 94   | 98  | 1046 | 148 | 114 | 427  | 163  | 421  | 504  | 178  |
| 164 | 280  | 66   | 71  | 354  | 2   | 5   | 250  | 20   | 38   | 276  | 46   |
| 165 | 189  | 43   | 87  | 208  | 39  | 73  | 154  | 17   | 21   | 184  | 63   |
| 166 | 228  | 60   | 134 | 230  | 14  | 146 | 684  | 98   | 110  | 488  | 90   |
| 167 | 1100 | 162  | 181 | 154  | 48  | 8   | 360  | 163  | 507  | 180  | 25   |
| 168 | 4798 | 1830 | 776 | 255  | 37  | 44  | 170  | 10   | 6    | 194  | 28   |
| 169 | 641  | 158  | 100 | 931  | 99  | 21  | 1778 | 224  | 1021 | 1648 | 284  |
| 170 | 322  | 117  | 74  | 278  | 46  | 16  | 287  | 76   | 84   | 594  | 218  |
| 171 | 190  | 19   | 32  | 296  | 73  | 10  | 198  | 67   | 27   | 236  | 69   |
| 173 | 156  | 61   | 36  | 524  | 41  | 36  | 147  | 27   | 27   | 488  | 193  |
| 174 | 244  | 16   | 70  | 307  | 37  | 47  | 206  | 69   | 65   | 353  | 111  |
| 175 | 358  | 47   | 162 | 272  | 12  | 16  | 226  | 29   | 68   | 265  | 76   |
| 176 | 1278 | 194  | 700 | 418  | 48  | 90  | 3139 | 2381 | 1031 | 380  | 16   |
| 177 | 750  | 62   | 240 | 540  | 90  | 156 | 6980 | 695  | 843  | 4450 | 1321 |
| 178 | 341  | 123  | 115 | 376  | 52  | 14  | 238  | 15   | 26   | 309  | 57   |
| 179 | 386  | 84   | 54  | 816  | 97  | 184 | 230  | 38   | 12   | 599  | 211  |
| 180 | 522  | 122  | 28  | 512  | 72  | 122 | 570  | 310  | 202  | 344  | 30   |
| 181 | 539  | 154  | 186 | 928  | 87  | 88  | 936  | 216  | 309  | 3673 | 1709 |
| 182 | 262  | 85   | 115 | 408  | 86  | 22  | 196  | 43   | 36   | 425  | 147  |
| 183 | 978  | 262  | 739 | 1208 | 60  | 176 | 255  | 48   | 258  | 1118 | 387  |
| 184 | 486  | 154  | 100 | 442  | 70  | 33  | 312  | 96   | 1120 | 427  | 45   |
| 186 | 207  | 33   | 110 | 292  | 7   | 107 | 233  | 13   | 75   | 255  | 79   |
| 187 | 300  | 94   | 115 | 240  | 78  | 108 | 201  | 41   | 52   | 226  | 43   |
| 188 | 344  | 68   | 104 | 383  | 54  | 28  | 236  | 40   | 40   | 383  | 39   |
| 189 | 336  | 51   | 93  | 544  | 41  | 72  | 352  | 105  | 114  | 2857 | 357  |
| 190 | 270  | 53   | 64  | 248  | 10  | 87  | 249  | 51   | 31   | 299  | 110  |
| 191 | 199  | 61   | 49  | 328  | 28  | 52  | 230  | 40   | 74   | 306  | 92   |
| 192 | 157  | 20   | 29  | 1634 | 85  | 544 | 162  | 42   | 130  | 452  | 89   |
| 193 | 204  | 56   | 110 | 4937 | 220 | 304 | 109  | 11   | 37   | 166  | 32   |
| 194 | 274  | 54   | 93  | 530  | 382 | 206 | 434  | 82   | 308  | 1152 | 861  |
| 195 | 220  | 92   | 146 | 174  | 109 | 71  | 304  | 139  | 132  | 482  | 222  |
| 196 | 280  | 164  | 74  | 184  | 25  | 241 | 204  | 76   | 104  | 267  | 168  |
| 197 | 168  | 52   | 150 | 255  | 137 | 116 | 221  | 65   | 241  | 221  | 58   |
| 198 | 252  | 78   | 529 | 341  | 50  | 91  | 154  | 44   | 22   | 1810 | 555  |
| 199 | 307  | 197  | 149 | 154  | 116 | 91  | 142  | 49   | 20   | 179  | 139  |
| 200 | 127  | 34   | 173 | 132  | 18  | 52  | 154  | 48   | 12   | 112  | 25   |
| 201 | 557  | 91   | 21  | 596  | 40  | 197 | 1008 | 251  | 139  | 808  | 271  |
| 202 | 355  | 74   | 153 | 793  | 40  | 37  | 778  | 243  | 198  | 421  | 171  |
| 203 | 192  | 38   | 48  | 466  | 10  | 10  | 120  | 20   | 44   | 314  | 40   |

|     |      |      |     |       |       |       |       |      |      |       |       |
|-----|------|------|-----|-------|-------|-------|-------|------|------|-------|-------|
| 204 | 154  | 12   | 16  | 125   | 19    | 97    | 151   | 13   | 61   | 166   | 22    |
| 205 | 157  | 31   | 19  | 673   | 45    | 31    | 138   | 45   | 43   | 167   | 16    |
| 206 | 435  | 75   | 143 | 334   | 42    | 60    | 771   | 235  | 216  | 329   | 71    |
| 207 | 280  | 40   | 34  | 488   | 29    | 101   | 154   | 34   | 12   | 402   | 78    |
| 215 | 267  | 53   | 230 | 290   | 102   | 101   | 110   | 37   | 24   | 176   | 60    |
| 216 | 1356 | 210  | 138 | 1223  | 44    | 0     | 2160  | 1706 | 2164 | 363   | 197   |
| 217 | 5467 | 732  | 415 | 33880 | 1415  | 1386  | 5990  | 2258 | 626  | 43266 | 16936 |
| 219 | 319  | 93   | 78  | 221   | 24    | 34    | 395   | 209  | 93   | 296   | 25    |
| 220 | 504  | 186  | 200 | 226   | 9     | 10    | 242   | 14   | 136  | 232   | 31    |
| 221 | 322  | 36   | 303 | 252   | 80    | 16    | 236   | 30   | 39   | 213   | 28    |
| 222 | 189  | 58   | 57  | 252   | 56    | 72    | 412   | 162  | 137  | 201   | 5     |
| 223 | 373  | 75   | 189 | 326   | 107   | 88    | 452   | 188  | 48   | 472   | 185   |
| 225 | 300  | 83   | 62  | 378   | 22    | 28    | 422   | 90   | 100  | 399   | 9     |
| 226 | 609  | 38   | 186 | 496   | 74    | 8     | 250   | 88   | 82   | 1403  | 750   |
| 227 | 858  | 86   | 110 | 468   | 42    | 55    | 118   | 19   | 90   | 1721  | 231   |
| 228 | 255  | 27   | 226 | 356   | 55    | 80    | 140   | 37   | 40   | 265   | 14    |
| 229 | 246  | 96   | 136 | 280   | 101   | 25    | 140   | 12   | 26   | 312   | 43    |
| 231 | 221  | 128  | 157 | 308   | 152   | 72    | 194   | 56   | 55   | 240   | 17    |
| 232 | 156  | 40   | 44  | 238   | 99    | 120   | 122   | 13   | 138  | 300   | 116   |
| 233 | 265  | 170  | 448 | 408   | 141   | 66    | 144   | 28   | 20   | 3566  | 2763  |
| 234 | 2506 | 1152 | 483 | 356   | 113   | 67    | 683   | 177  | 210  | 15906 | 5631  |
| 235 | 731  | 90   | 58  | 662   | 164   | 125   | 144   | 61   | 2775 | 329   | 100   |
| 236 | 688  | 226  | 190 | 1090  | 48    | 95    | 246   | 55   | 82   | 572   | 33    |
| 237 | 1068 | 304  | 138 | 998   | 94    | 126   | 294   | 116  | 139  | 714   | 161   |
| 239 | 174  | 92   | 144 | 208   | 18    | 28    | 120   | 20   | 56   | 208   | 18    |
| 240 | 367  | 88   | 203 | 1758  | 272   | 89    | 239   | 51   | 132  | 382   | 66    |
| 241 | 172  | 34   | 58  | 202   | 38    | 40    | 247   | 69   | 56   | 228   | 69    |
| 242 | 698  | 142  | 134 | 771   | 96    | 81    | 174   | 28   | 65   | 516   | 128   |
| 243 | 437  | 62   | 78  | 730   | 94    | 99    | 157   | 26   | 72   | 532   | 104   |
| 245 | 1201 | 344  | 184 | 8411  | 449   | 795   | 1190  | 703  | 383  | 2358  | 300   |
| 246 | 288  | 78   | 40  | 594   | 115   | 24    | 310   | 147  | 108  | 250   | 52    |
| 247 | 179  | 38   | 31  | 176   | 26    | 72    | 154   | 21   | 2    | 198   | 10    |
| 248 | 538  | 105  | 141 | 366   | 46    | 80    | 230   | 84   | 174  | 561   | 158   |
| 249 | 1849 | 192  | 391 | 255   | 98    | 121   | 7630  | 6280 | 5831 | 22325 | 1619  |
| 250 | 1800 | 250  | 210 | 287   | 137   | 65    | 11943 | 3947 | 595  | 18576 | 4601  |
| 251 | 2704 | 382  | 332 | 86    | 7     | 17    | 122   | 28   | 57   | 280   | 164   |
| 252 | 520  | 299  | 182 | 449   | 40    | 35    | 144   | 22   | 23   | 137   | 42    |
| 253 | 284  | 72   | 313 | 3491  | 199   | 240   | 1338  | 1010 | 535  | 1690  | 281   |
| 254 | 172  | 31   | 66  | 249   | 59    | 87    | 153   | 38   | 44   | 255   | 17    |
| 255 | 2258 | 168  | 80  | 156   | 51    | 78    | 163   | 47   | 48   | 268   | 40    |
| 256 | 328  | 98   | 62  | 616   | 80    | 42    | 130   | 56   | 146  | 6086  | 593   |
| 258 | 312  | 94   | 85  | 226   | 62    | 32    | 204   | 67   | 31   | 201   | 17    |
| 259 | 176  | 19   | 5   | 426   | 24    | 67    | 673   | 132  | 156  | 3393  | 1289  |
| 260 | 2753 | 145  | 176 | 287   | 80    | 17    | 214   | 35   | 130  | 328   | 58    |
| 261 | 262  | 102  | 72  | 517   | 43    | 43    | 2622  | 759  | 204  | 8050  | 2618  |
| 262 | 233  | 52   | 140 | 291   | 26    | 27    | 201   | 86   | 1454 | 402   | 69    |
| 263 | 201  | 61   | 143 | 150   | 44    | 186   | 303   | 157  | 9818 | 250   | 22    |
| 264 | 149  | 79   | 121 | 52434 | 21924 | 13101 | 7086  | 1912 | 1432 | 30150 | 8032  |
| 266 | 162  | 78   | 120 | 316   | 104   | 88    | 137   | 29   | 4    | 150   | 45    |
| 267 | 463  | 234  | 16  | 398   | 170   | 52    | 100   | 13   | 25   | 360   | 196   |

|     |       |      |      |      |     |     |      |      |      |       |      |
|-----|-------|------|------|------|-----|-----|------|------|------|-------|------|
| 268 | 1392  | 268  | 233  | 1032 | 153 | 21  | 350  | 194  | 1550 | 768   | 24   |
| 287 | 210   | 96   | 122  | 228  | 68  | 108 | 198  | 48   | 85   | 182   | 92   |
| 288 | 179   | 70   | 26   | 294  | 22  | 36  | 238  | 50   | 117  | 218   | 38   |
| 289 | 206   | 88   | 19   | 160  | 105 | 186 | 157  | 7    | 13   | 282   | 126  |
| 290 | 167   | 87   | 149  | 66   | 34  | 398 | 174  | 34   | 68   | 446   | 240  |
| 291 | 198   | 6    | 308  | 256  | 64  | 81  | 170  | 31   | 13   | 256   | 65   |
| 292 | 220   | 72   | 14   | 625  | 83  | 55  | 444  | 126  | 120  | 255   | 123  |
| 293 | 518   | 60   | 117  | 322  | 61  | 25  | 210  | 37   | 100  | 245   | 11   |
| 294 | 452   | 62   | 58   | 410  | 31  | 68  | 300  | 122  | 66   | 386   | 157  |
| 295 | 281   | 65   | 223  | 379  | 23  | 51  | 151  | 35   | 25   | 255   | 49   |
| 296 | 314   | 78   | 9    | 314  | 28  | 38  | 218  | 66   | 84   | 284   | 104  |
| 297 | 176   | 43   | 40   | 310  | 30  | 43  | 157  | 14   | 32   | 250   | 56   |
| 298 | 507   | 35   | 125  | 157  | 51  | 55  | 886  | 251  | 98   | 634   | 86   |
| 299 | 156   | 44   | 26   | 66   | 31  | 31  | 120  | 25   | 36   | 60    | 13   |
| 300 | 122   | 13   | 21   | 2140 | 100 | 129 | 105  | 21   | 25   | 112   | 12   |
| 302 | 112   | 14   | 22   | 163  | 34  | 72  | 110  | 13   | 14   | 112   | 46   |
| 303 | 576   | 53   | 3    | 196  | 66  | 19  | 603  | 212  | 51   | 686   | 232  |
| 304 | 116   | 40   | 186  | 2116 | 404 | 92  | 176  | 9    | 216  | 211   | 62   |
| 305 | 223   | 50   | 43   | 306  | 153 | 18  | 402  | 173  | 10   | 277   | 106  |
| 306 | 146   | 61   | 128  | 1816 | 626 | 364 | 227  | 59   | 30   | 357   | 159  |
| 307 | 182   | 69   | 48   | 184  | 128 | 188 | 246  | 90   | 52   | 316   | 209  |
| 308 | 312   | 71   | 192  | 287  | 39  | 36  | 151  | 12   | 54   | 348   | 49   |
| 309 | 136   | 16   | 14   | 172  | 24  | 12  | 206  | 54   | 53   | 179   | 17   |
| 310 | 409   | 65   | 47   | 118  | 32  | 22  | 370  | 123  | 101  | 212   | 41   |
| 315 | 462   | 83   | 126  | 874  | 81  | 56  | 490  | 101  | 154  | 552   | 190  |
| 318 | 169   | 55   | 26   | 368  | 37  | 26  | 148  | 28   | 8    | 131   | 19   |
| 319 | 774   | 185  | 35   | 609  | 71  | 71  | 2852 | 954  | 594  | 800   | 214  |
| 320 | 1122  | 284  | 200  | 2024 | 139 | 128 | 4614 | 2120 | 590  | 1120  | 164  |
| 321 | 196   | 66   | 59   | 150  | 31  | 34  | 124  | 10   | 27   | 152   | 87   |
| 322 | 194   | 8    | 29   | 306  | 25  | 19  | 115  | 2    | 50   | 186   | 64   |
| 323 | 103   | 4    | 24   | 144  | 39  | 57  | 108  | 20   | 19   | 179   | 38   |
| 324 | 248   | 17   | 65   | 216  | 10  | 10  | 280  | 125  | 67   | 230   | 62   |
| 325 | 210   | 127  | 154  | 262  | 133 | 57  | 204  | 67   | 236  | 314   | 103  |
| 326 | 188   | 72   | 99   | 394  | 101 | 33  | 314  | 4    | 19   | 174   | 89   |
| 327 | 265   | 125  | 67   | 316  | 164 | 7   | 164  | 49   | 53   | 169   | 105  |
| 328 | 166   | 45   | 25   | 300  | 79  | 104 | 206  | 58   | 141  | 255   | 164  |
| 329 | 1537  | 330  | 348  | 1442 | 128 | 139 | 1845 | 1464 | 972  | 1118  | 344  |
| 330 | 344   | 114  | 206  | 294  | 71  | 64  | 220  | 31   | 42   | 211   | 37   |
| 331 | 356   | 41   | 26   | 235  | 69  | 74  | 130  | 13   | 88   | 83    | 23   |
| 332 | 478   | 62   | 254  | 408  | 24  | 48  | 326  | 116  | 90   | 297   | 21   |
| 333 | 198   | 74   | 71   | 233  | 23  | 7   | 188  | 26   | 20   | 112   | 35   |
| 334 | 236   | 26   | 66   | 520  | 92  | 10  | 494  | 76   | 42   | 316   | 14   |
| 335 | 169   | 41   | 66   | 162  | 82  | 62  | 348  | 33   | 59   | 140   | 26   |
| 359 | 702   | 101  | 40   | 366  | 41  | 30  | 282  | 66   | 11   | 1098  | 190  |
| 360 | 216   | 134  | 108  | 296  | 14  | 60  | 106  | 12   | 18   | 1136  | 838  |
| 361 | 258   | 6    | 27   | 494  | 34  | 70  | 141  | 41   | 46   | 1154  | 356  |
| 362 | 11714 | 777  | 2376 | 5568 | 275 | 147 | 1332 | 767  | 803  | 65535 | 7525 |
| 363 | 3880  | 1257 | 1426 | 344  | 72  | 487 | 529  | 46   | 80   | 9494  | 5013 |
| 364 | 1872  | 72   | 75   | 1699 | 159 | 35  | 1384 | 175  | 41   | 1131  | 191  |
| 365 | 154   | 51   | 37   | 192  | 34  | 44  | 124  | 18   | 38   | 140   | 60   |

|     |      |      |      |       |      |      |      |      |      |       |      |
|-----|------|------|------|-------|------|------|------|------|------|-------|------|
| 366 | 350  | 45   | 83   | 498   | 70   | 16   | 141  | 11   | 21   | 382   | 36   |
| 368 | 116  | 16   | 15   | 8434  | 344  | 316  | 3285 | 469  | 664  | 383   | 214  |
| 369 | 245  | 38   | 27   | 314   | 14   | 53   | 130  | 26   | 50   | 246   | 53   |
| 371 | 201  | 63   | 179  | 248   | 32   | 21   | 335  | 153  | 466  | 198   | 61   |
| 372 | 2909 | 249  | 666  | 142   | 33   | 67   | 122  | 8    | 35   | 70    | 6    |
| 373 | 270  | 46   | 63   | 260   | 47   | 108  | 204  | 10   | 11   | 233   | 71   |
| 374 | 122  | 37   | 31   | 201   | 52   | 55   | 166  | 18   | 321  | 188   | 32   |
| 375 | 172  | 24   | 167  | 159   | 67   | 86   | 244  | 83   | 412  | 230   | 31   |
| 376 | 184  | 50   | 42   | 102   | 54   | 556  | 184  | 22   | 22   | 476   | 292  |
| 377 | 126  | 32   | 29   | 498   | 302  | 190  | 279  | 118  | 141  | 332   | 86   |
| 378 | 192  | 62   | 32   | 1454  | 234  | 29   | 635  | 121  | 272  | 864   | 598  |
| 379 | 144  | 11   | 8    | 532   | 318  | 26   | 201  | 79   | 109  | 370   | 136  |
| 380 | 670  | 308  | 228  | 5963  | 738  | 1325 | 1558 | 361  | 585  | 2816  | 1776 |
| 381 | 147  | 48   | 24   | 3953  | 969  | 544  | 2699 | 1376 | 665  | 2664  | 887  |
| 382 | 246  | 38   | 128  | 274   | 118  | 52   | 147  | 5    | 5    | 336   | 26   |
| 383 | 400  | 202  | 47   | 226   | 73   | 179  | 233  | 71   | 86   | 475   | 202  |
| 384 | 307  | 89   | 81   | 304   | 101  | 97   | 358  | 67   | 46   | 380   | 174  |
| 386 | 8888 | 228  | 219  | 16605 | 1277 | 163  | 7840 | 2364 | 1749 | 10940 | 3376 |
| 387 | 309  | 27   | 274  | 3992  | 342  | 560  | 1580 | 1136 | 939  | 2238  | 1617 |
| 388 | 115  | 6    | 6    | 146   | 68   | 32   | 130  | 25   | 36   | 126   | 31   |
| 389 | 160  | 36   | 71   | 270   | 15   | 22   | 152  | 48   | 52   | 395   | 150  |
| 390 | 280  | 48   | 179  | 218   | 80   | 34   | 558  | 309  | 80   | 1797  | 178  |
| 392 | 8618 | 1891 | 1804 | 10288 | 447  | 254  | 3424 | 2463 | 1403 | 7320  | 720  |
| 394 | 771  | 116  | 78   | 538   | 107  | 22   | 614  | 145  | 176  | 1150  | 160  |
| 395 | 979  | 49   | 399  | 852   | 88   | 108  | 144  | 39   | 25   | 568   | 56   |
| 396 | 608  | 232  | 178  | 816   | 78   | 76   | 136  | 21   | 68   | 1820  | 191  |
| 397 | 202  | 58   | 16   | 676   | 64   | 89   | 358  | 13   | 47   | 985   | 327  |
| 398 | 156  | 64   | 107  | 86    | 20   | 61   | 272  | 68   | 16   | 172   | 14   |
| 399 | 110  | 33   | 206  | 1727  | 414  | 185  | 418  | 231  | 220  | 287   | 144  |
| 401 | 216  | 101  | 428  | 366   | 152  | 222  | 128  | 24   | 23   | 90    | 34   |
| 402 | 132  | 2    | 136  | 150   | 21   | 18   | 144  | 55   | 2925 | 151   | 21   |
| 403 | 164  | 23   | 20   | 454   | 50   | 52   | 294  | 51   | 96   | 427   | 85   |
| 419 | 154  | 11   | 11   | 245   | 0    | 13   | 104  | 5    | 9    | 166   | 23   |
| 420 | 542  | 38   | 198  | 281   | 29   | 86   | 140  | 46   | 532  | 176   | 4    |
| 423 | 220  | 58   | 86   | 46    | 6    | 10   | 93   | 14   | 24   | 64    | 13   |
| 425 | 388  | 114  | 227  | 102   | 25   | 41   | 140  | 7    | 28   | 108   | 12   |
| 426 | 174  | 34   | 12   | 68    | 27   | 4    | 122  | 9    | 36   | 130   | 25   |
| 428 | 214  | 94   | 85   | 432   | 178  | 74   | 218  | 103  | 110  | 238   | 21   |
| 429 | 188  | 14   | 23   | 106   | 52   | 66   | 112  | 34   | 54   | 104   | 26   |
| 431 | 186  | 104  | 72   | 115   | 3    | 17   | 130  | 28   | 10   | 116   | 53   |
| 432 | 299  | 24   | 143  | 137   | 69   | 84   | 160  | 25   | 48   | 194   | 96   |
| 433 | 152  | 23   | 216  | 112   | 8    | 16   | 112  | 17   | 9    | 144   | 8    |
| 434 | 211  | 16   | 42   | 268   | 23   | 35   | 115  | 17   | 21   | 206   | 64   |
| 435 | 181  | 5    | 49   | 302   | 32   | 76   | 176  | 59   | 136  | 144   | 46   |
| 436 | 517  | 60   | 31   | 182   | 28   | 36   | 542  | 302  | 8    | 191   | 22   |
| 437 | 5980 | 418  | 161  | 6145  | 384  | 339  | 1592 | 1187 | 1050 | 6085  | 219  |
| 479 | 268  | 34   | 55   | 282   | 27   | 75   | 102  | 44   | 35   | 194   | 92   |
| 480 | 1899 | 353  | 47   | 2184  | 178  | 127  | 2307 | 419  | 392  | 1194  | 312  |
| 481 | 360  | 194  | 125  | 508   | 263  | 71   | 170  | 7    | 18   | 459   | 105  |
| 483 | 100  | 34   | 65   | 80    | 20   | 65   | 130  | 3    | 64   | 115   | 39   |

|      |      |      |     |       |      |      |      |     |      |       |      |
|------|------|------|-----|-------|------|------|------|-----|------|-------|------|
| 492  | 128  | 17   | 24  | 224   | 15   | 10   | 260  | 73  | 65   | 414   | 21   |
| 493  | 166  | 64   | 100 | 76    | 26   | 26   | 110  | 28  | 1668 | 108   | 12   |
| 495  | 390  | 30   | 48  | 539   | 89   | 65   | 182  | 64  | 33   | 223   | 39   |
| 496  | 1245 | 361  | 101 | 931   | 94   | 53   | 152  | 24  | 34   | 566   | 238  |
| 497  | 2973 | 1229 | 93  | 527   | 75   | 47   | 452  | 49  | 60   | 494   | 33   |
| 498  | 518  | 55   | 113 | 182   | 48   | 52   | 98   | 4   | 44   | 260   | 30   |
| 499  | 405  | 79   | 56  | 208   | 12   | 31   | 125  | 12  | 37   | 142   | 8    |
| 501  | 206  | 116  | 215 | 319   | 117  | 78   | 170  | 3   | 16   | 235   | 35   |
| 502  | 154  | 63   | 30  | 182   | 43   | 14   | 130  | 10  | 42   | 234   | 88   |
| 503  | 240  | 121  | 125 | 494   | 352  | 203  | 148  | 1   | 84   | 154   | 32   |
| 504  | 150  | 54   | 38  | 62    | 32   | 80   | 144  | 14  | 8    | 106   | 18   |
| 505  | 1286 | 333  | 130 | 975   | 51   | 99   | 478  | 242 | 2724 | 755   | 116  |
| 506  | 1000 | 37   | 55  | 1043  | 31   | 49   | 847  | 171 | 33   | 867   | 60   |
| 527  | 108  | 32   | 28  | 191   | 18   | 77   | 114  | 5   | 8    | 212   | 42   |
| 528  | 104  | 14   | 23  | 88    | 5    | 9    | 96   | 22  | 208  | 122   | 32   |
| 529  | 208  | 22   | 108 | 574   | 62   | 85   | 140  | 3   | 24   | 768   | 244  |
| 530  | 238  | 10   | 28  | 128   | 26   | 29   | 148  | 50  | 33   | 112   | 20   |
| 531  | 112  | 24   | 32  | 108   | 52   | 70   | 128  | 6   | 11   | 152   | 44   |
| 534  | 130  | 7    | 39  | 154   | 22   | 48   | 90   | 11  | 22   | 90    | 6    |
| 535  | 162  | 53   | 34  | 168   | 62   | 171  | 210  | 44  | 76   | 264   | 190  |
| 536  | 106  | 45   | 14  | 140   | 37   | 32   | 127  | 7   | 34   | 321   | 265  |
| 537  | 90   | 7    | 28  | 105   | 57   | 80   | 220  | 120 | 80   | 262   | 147  |
| 538  | 124  | 37   | 10  | 688   | 129  | 18   | 201  | 49  | 29   | 864   | 210  |
| 539  | 162  | 30   | 258 | 191   | 99   | 35   | 127  | 15  | 29   | 210   | 7    |
| 540  | 132  | 12   | 26  | 130   | 13   | 16   | 144  | 40  | 34   | 182   | 94   |
| 541  | 132  | 43   | 25  | 240   | 18   | 12   | 162  | 56  | 55   | 306   | 104  |
| 542  | 191  | 69   | 10  | 982   | 186  | 95   | 138  | 56  | 246  | 626   | 237  |
| 625  | 68   | 9    | 5   | 39    | 0    | 2    | 90   | 16  | 20   | 46    | 11   |
| 627  | 138  | 5    | 7   | 103   | 4    | 14   | 103  | 1   | 11   | 136   | 11   |
| 800  | 596  | 360  | 443 | 685   | 164  | 195  | 174  | 41  | 72   | 144   | 16   |
| 801  | 162  | 36   | 72  | 80    | 24   | 10   | 112  | 20  | 16   | 306   | 24   |
| 900  | 216  | 21   | 23  | 214   | 42   | 26   | 218  | 21  | 34   | 208   | 31   |
| 1001 | 137  | 38   | 189 | 238   | 122  | 262  | 240  | 32  | 58   | 602   | 339  |
| 1002 | 132  | 32   | 36  | 156   | 92   | 314  | 444  | 201 | 58   | 676   | 523  |
| 1003 | 112  | 19   | 94  | 162   | 42   | 336  | 280  | 127 | 329  | 528   | 354  |
| 1004 | 2698 | 408  | 39  | 23668 | 2844 | 4856 | 2954 | 304 | 694  | 12210 | 1586 |
| 1005 | 127  | 18   | 262 | 232   | 95   | 235  | 264  | 74  | 334  | 863   | 483  |
| 1006 | 158  | 65   | 126 | 194   | 98   | 374  | 412  | 148 | 80   | 768   | 675  |
| 1007 | 106  | 30   | 62  | 236   | 93   | 132  | 342  | 155 | 47   | 864   | 730  |
| 1008 | 179  | 66   | 77  | 275   | 57   | 134  | 516  | 92  | 230  | 533   | 276  |
| 1009 | 98   | 21   | 426 | 310   | 182  | 384  | 321  | 123 | 348  | 830   | 442  |
| 1010 | 118  | 29   | 28  | 404   | 169  | 118  | 469  | 229 | 236  | 850   | 718  |
| 1011 | 147  | 63   | 95  | 312   | 127  | 82   | 280  | 100 | 287  | 894   | 736  |
| 1012 | 180  | 75   | 81  | 303   | 82   | 53   | 562  | 281 | 215  | 378   | 153  |
| 1013 | 102  | 26   | 317 | 164   | 48   | 296  | 328  | 166 | 286  | 1056  | 806  |
| 1014 | 113  | 7    | 3   | 417   | 203  | 146  | 424  | 207 | 179  | 867   | 748  |
| 1015 | 140  | 27   | 71  | 245   | 87   | 242  | 411  | 201 | 200  | 1012  | 819  |
| 1016 | 142  | 10   | 27  | 2110  | 169  | 652  | 310  | 94  | 439  | 218   | 163  |
| 1017 | 307  | 164  | 189 | 364   | 164  | 94   | 366  | 175 | 71   | 1592  | 1015 |
| 1018 | 164  | 61   | 132 | 604   | 150  | 80   | 570  | 256 | 517  | 803   | 606  |

|      |       |      |      |       |      |      |      |      |      |       |       |
|------|-------|------|------|-------|------|------|------|------|------|-------|-------|
| 1019 | 110   | 21   | 44   | 246   | 74   | 332  | 568  | 308  | 203  | 781   | 546   |
| 1020 | 146   | 12   | 6    | 354   | 38   | 40   | 526  | 220  | 304  | 338   | 222   |
| 1021 | 166   | 70   | 55   | 208   | 106  | 95   | 150  | 24   | 1763 | 184   | 54    |
| 1022 | 358   | 26   | 96   | 584   | 46   | 106  | 242  | 34   | 86   | 286   | 51    |
| 1023 | 184   | 31   | 31   | 3986  | 562  | 309  | 876  | 386  | 192  | 5944  | 3514  |
| 1024 | 78    | 0    | 4    | 39    | 14   | 24   | 142  | 24   | 38   | 148   | 28    |
| 1025 | 98    | 22   | 18   | 100   | 37   | 87   | 137  | 9    | 71   | 98    | 28    |
| 1026 | 185   | 23   | 10   | 304   | 38   | 48   | 118  | 9    | 43   | 156   | 80    |
| 1027 | 96    | 3    | 34   | 56    | 12   | 31   | 208  | 49   | 31   | 100   | 2     |
| 1201 | 216   | 82   | 23   | 106   | 40   | 12   | 169  | 18   | 26   | 223   | 29    |
| 1202 | 452   | 98   | 32   | 696   | 63   | 97   | 505  | 180  | 38   | 1516  | 566   |
| 1203 | 642   | 37   | 13   | 449   | 59   | 102  | 182  | 31   | 52   | 354   | 74    |
| 1204 | 184   | 33   | 33   | 72    | 12   | 54   | 203  | 57   | 87   | 186   | 33    |
| 1205 | 240   | 50   | 53   | 95    | 27   | 63   | 244  | 62   | 28   | 194   | 8     |
| 1206 | 178   | 68   | 125  | 280   | 176  | 196  | 242  | 48   | 163  | 1880  | 1208  |
| 1207 | 164   | 28   | 28   | 570   | 256  | 49   | 771  | 495  | 665  | 964   | 737   |
| 1208 | 63706 | 9186 | 1829 | 4290  | 374  | 300  | 5002 | 315  | 1406 | 24601 | 9179  |
| 1209 | 258   | 56   | 55   | 599   | 200  | 151  | 642  | 124  | 926  | 373   | 182   |
| 1210 | 132   | 39   | 220  | 268   | 142  | 348  | 320  | 72   | 161  | 1774  | 1168  |
| 1211 | 666   | 36   | 51   | 306   | 89   | 116  | 484  | 58   | 625  | 1017  | 625   |
| 1212 | 244   | 18   | 68   | 272   | 128  | 101  | 388  | 69   | 415  | 1854  | 1062  |
| 1213 | 202   | 56   | 107  | 352   | 76   | 148  | 331  | 122  | 413  | 510   | 307   |
| 1214 | 150   | 36   | 160  | 296   | 137  | 174  | 304  | 136  | 368  | 1867  | 1208  |
| 1215 | 147   | 5    | 16   | 526   | 255  | 217  | 776  | 377  | 602  | 1184  | 848   |
| 1216 | 254   | 112  | 98   | 602   | 388  | 44   | 314  | 54   | 264  | 383   | 256   |
| 1217 | 292   | 90   | 86   | 528   | 284  | 357  | 478  | 78   | 188  | 555   | 289   |
| 1218 | 270   | 93   | 169  | 342   | 70   | 165  | 390  | 95   | 659  | 2083  | 1235  |
| 1219 | 146   | 54   | 118  | 518   | 296  | 134  | 934  | 611  | 785  | 1302  | 984   |
| 1220 | 7418  | 2407 | 1397 | 16690 | 2861 | 4078 | 5641 | 1241 | 2043 | 26970 | 11004 |
| 1221 | 316   | 94   | 166  | 644   | 416  | 542  | 632  | 74   | 743  | 840   | 318   |
| 1222 | 1960  | 690  | 626  | 862   | 26   | 43   | 2608 | 1868 | 333  | 938   | 66    |
| 1223 | 140   | 35   | 48   | 194   | 80   | 76   | 342  | 126  | 83   | 182   | 98    |
| 1224 | 142   | 26   | 133  | 88    | 20   | 9    | 206  | 81   | 40   | 161   | 49    |
| 1225 | 1098  | 93   | 156  | 960   | 85   | 29   | 380  | 114  | 41   | 564   | 91    |
| 1226 | 154   | 42   | 47   | 77    | 15   | 9    | 237  | 64   | 81   | 184   | 40    |
| 1230 | 162   | 32   | 54   | 72    | 6    | 10   | 238  | 70   | 118  | 194   | 47    |
| 1231 | 188   | 58   | 96   | 96    | 27   | 33   | 250  | 97   | 140  | 206   | 22    |
| 1232 | 176   | 36   | 59   | 65535 | 4198 | 0    | 7811 | 5839 | 910  | 34943 | 26848 |
| 1233 | 144   | 32   | 41   | 676   | 152  | 68   | 132  | 19   | 68   | 156   | 72    |
| 1234 | 122   | 14   | 44   | 110   | 54   | 36   | 182  | 44   | 101  | 201   | 19    |
| 1238 | 132   | 27   | 20   | 73    | 9    | 24   | 188  | 12   | 19   | 192   | 24    |
| 1239 | 132   | 4    | 100  | 196   | 87   | 31   | 222  | 82   | 3    | 245   | 75    |
| 1240 | 146   | 34   | 122  | 124   | 20   | 6    | 152  | 16   | 40   | 231   | 47    |
| 1241 | 454   | 112  | 42   | 200   | 59   | 55   | 260  | 56   | 20   | 250   | 12    |
| 1401 | 90    | 7    | 10   | 122   | 40   | 0    | 162  | 35   | 66   | 168   | 17    |
| 1402 | 76    | 8    | 14   | 46    | 10   | 10   | 119  | 29   | 57   | 78    | 11    |
| 1403 | 100   | 22   | 37   | 63    | 12   | 9    | 140  | 26   | 36   | 132   | 12    |
| 1404 | 83    | 15   | 0    | 68    | 14   | 25   | 127  | 10   | 27   | 42    | 12    |
| 1405 | 124   | 14   | 16   | 83    | 27   | 16   | 162  | 64   | 204  | 124   | 64    |
| 1406 | 76    | 7    | 24   | 88    | 15   | 59   | 186  | 14   | 50   | 76    | 21    |



|      |      |      |     |      |     |     |      |      |      |      |      |
|------|------|------|-----|------|-----|-----|------|------|------|------|------|
| 1407 | 184  | 47   | 164 | 678  | 308 | 66  | 371  | 187  | 526  | 386  | 231  |
| 1408 | 86   | 14   | 413 | 326  | 83  | 683 | 472  | 171  | 1477 | 2212 | 866  |
| 1409 | 186  | 112  | 274 | 555  | 349 | 415 | 480  | 226  | 782  | 562  | 389  |
| 1410 | 420  | 282  | 250 | 834  | 281 | 172 | 528  | 335  | 634  | 1727 | 1122 |
| 1412 | 86   | 7    | 12  | 146  | 53  | 25  | 162  | 50   | 17   | 409  | 69   |
| 1413 | 631  | 111  | 91  | 786  | 118 | 74  | 459  | 147  | 52   | 120  | 54   |
| 1416 | 108  | 22   | 62  | 486  | 91  | 76  | 698  | 126  | 268  | 227  | 126  |
| 1418 | 96   | 28   | 36  | 326  | 17  | 44  | 154  | 36   | 37   | 154  | 74   |
| 1501 | 626  | 228  | 120 | 302  | 32  | 35  | 316  | 132  | 89   | 316  | 154  |
| 1601 | 115  | 32   | 401 | 582  | 254 | 251 | 415  | 139  | 811  | 968  | 617  |
| 1602 | 112  | 43   | 394 | 422  | 150 | 559 | 412  | 31   | 303  | 696  | 282  |
| 1603 | 296  | 173  | 226 | 793  | 538 | 221 | 689  | 287  | 1032 | 437  | 257  |
| 1605 | 162  | 40   | 32  | 83   | 22  | 2   | 142  | 46   | 24   | 188  | 6    |
| 1606 | 182  | 105  | 141 | 354  | 24  | 124 | 1587 | 233  | 327  | 412  | 258  |
| 1607 | 260  | 118  | 11  | 179  | 46  | 49  | 206  | 25   | 168  | 835  | 258  |
| 1608 | 115  | 26   | 33  | 76   | 25  | 21  | 206  | 40   | 84   | 172  | 49   |
| 1609 | 326  | 106  | 76  | 319  | 119 | 60  | 205  | 8    | 68   | 346  | 21   |
| 1610 | 7958 | 1900 | 552 | 1926 | 72  | 116 | 740  | 167  | 172  | 314  | 110  |
| 1611 | 726  | 63   | 122 | 868  | 18  | 146 | 557  | 88   | 58   | 478  | 104  |
| 1613 | 214  | 78   | 49  | 258  | 10  | 61  | 255  | 31   | 5    | 245  | 41   |
| 1614 | 818  | 243  | 84  | 310  | 42  | 48  | 328  | 30   | 22   | 262  | 83   |
| 1615 | 262  | 18   | 55  | 226  | 150 | 91  | 282  | 64   | 99   | 201  | 88   |
| 1616 | 196  | 56   | 86  | 152  | 67  | 33  | 184  | 41   | 42   | 169  | 38   |
| 1617 | 150  | 61   | 449 | 689  | 247 | 354 | 368  | 56   | 49   | 1204 | 734  |
| 1618 | 115  | 26   | 409 | 268  | 83  | 550 | 402  | 150  | 254  | 998  | 526  |
| 1701 | 398  | 289  | 366 | 680  | 501 | 682 | 538  | 213  | 1317 | 462  | 336  |
| 1702 | 584  | 426  | 361 | 790  | 535 | 234 | 220  | 50   | 334  | 406  | 302  |
| 1703 | 266  | 70   | 33  | 240  | 17  | 54  | 148  | 34   | 55   | 274  | 71   |
| 1705 | 302  | 134  | 129 | 398  | 56  | 0   | 238  | 52   | 62   | 448  | 93   |
| 1706 | 200  | 82   | 21  | 76   | 20  | 28  | 174  | 11   | 158  | 178  | 42   |
| 1707 | 150  | 40   | 6   | 1166 | 223 | 91  | 206  | 54   | 30   | 240  | 48   |
| 1801 | 274  | 97   | 84  | 276  | 8   | 22  | 309  | 69   | 39   | 364  | 95   |
| 1802 | 170  | 27   | 103 | 373  | 116 | 35  | 176  | 16   | 21   | 265  | 39   |
| 1804 | 265  | 35   | 65  | 100  | 26  | 12  | 280  | 56   | 57   | 184  | 17   |
| 1806 | 162  | 38   | 45  | 120  | 58  | 36  | 169  | 37   | 22   | 222  | 42   |
| 1807 | 94   | 15   | 73  | 110  | 46  | 36  | 160  | 16   | 29   | 160  | 16   |
| 1808 | 132  | 40   | 92  | 692  | 362 | 604 | 434  | 128  | 60   | 1361 | 648  |
| 1809 | 504  | 319  | 331 | 152  | 76  | 758 | 338  | 83   | 523  | 527  | 320  |
| 1810 | 320  | 173  | 444 | 648  | 430 | 572 | 427  | 193  | 118  | 514  | 341  |
| 2001 | 452  | 70   | 236 | 636  | 212 | 381 | 366  | 216  | 536  | 434  | 148  |
| 2002 | 282  | 61   | 25  | 252  | 134 | 86  | 169  | 31   | 33   | 284  | 36   |
| 2003 | 272  | 93   | 75  | 1612 | 241 | 255 | 902  | 182  | 222  | 2715 | 1342 |
| 2004 | 287  | 147  | 52  | 2101 | 253 | 260 | 169  | 20   | 61   | 183  | 60   |
| 2005 | 88   | 9    | 16  | 63   | 19  | 9   | 186  | 49   | 363  | 64   | 14   |
| 2006 | 616  | 216  | 475 | 2910 | 479 | 850 | 2812 | 1997 | 584  | 1090 | 248  |
| 2007 | 115  | 13   | 6   | 96   | 16  | 191 | 152  | 34   | 34   | 132  | 52   |
| 2008 | 138  | 34   | 95  | 52   | 10  | 50  | 198  | 50   | 51   | 180  | 41   |
| 2009 | 339  | 67   | 22  | 275  | 19  | 7   | 152  | 34   | 102  | 262  | 11   |
| 2010 | 342  | 87   | 134 | 228  | 60  | 10  | 236  | 42   | 89   | 344  | 31   |
| 2011 | 144  | 21   | 40  | 160  | 79  | 100 | 194  | 63   | 51   | 189  | 87   |



|      |       |      |      |      |     |      |      |      |      |      |      |
|------|-------|------|------|------|-----|------|------|------|------|------|------|
| 2012 | 390   | 59   | 103  | 142  | 44  | 33   | 174  | 11   | 78   | 216  | 40   |
| 2013 | 124   | 27   | 32   | 106  | 20  | 15   | 152  | 30   | 91   | 160  | 20   |
| 2101 | 5032  | 1804 | 521  | 612  | 222 | 105  | 3180 | 1988 | 606  | 2339 | 1606 |
| 2102 | 147   | 57   | 687  | 425  | 283 | 1007 | 332  | 70   | 772  | 920  | 718  |
| 2103 | 238   | 46   | 164  | 174  | 104 | 415  | 362  | 42   | 33   | 621  | 379  |
| 2104 | 543   | 267  | 339  | 488  | 280 | 764  | 230  | 45   | 824  | 415  | 230  |
| 2105 | 3956  | 1149 | 861  | 6289 | 254 | 945  | 870  | 550  | 310  | 936  | 246  |
| 2106 | 13386 | 5111 | 2111 | 98   | 47  | 32   | 302  | 150  | 28   | 214  | 17   |
| 2107 | 119   | 25   | 34   | 1896 | 260 | 348  | 192  | 35   | 148  | 230  | 96   |
| 2201 | 108   | 28   | 49   | 66   | 15  | 18   | 198  | 90   | 194  | 184  | 41   |
| 2202 | 134   | 42   | 62   | 90   | 20  | 20   | 284  | 114  | 2942 | 186  | 63   |
| 2203 | 206   | 54   | 102  | 112  | 28  | 35   | 223  | 76   | 28   | 233  | 39   |
| 2204 | 169   | 27   | 71   | 144  | 34  | 31   | 248  | 78   | 26   | 198  | 45   |
| 2205 | 620   | 175  | 22   | 336  | 42  | 10   | 574  | 124  | 154  | 491  | 107  |
| 2206 | 350   | 110  | 82   | 208  | 34  | 17   | 260  | 46   | 55   | 276  | 35   |
| 2207 | 259   | 22   | 151  | 138  | 20  | 8    | 316  | 22   | 32   | 412  | 177  |
| 2208 | 216   | 22   | 119  | 109  | 26  | 55   | 186  | 34   | 53   | 268  | 37   |
| 2209 | 211   | 49   | 103  | 55   | 19  | 24   | 142  | 5    | 82   | 159  | 41   |
| 2210 | 154   | 45   | 50   | 642  | 485 | 808  | 899  | 611  | 2551 | 1712 | 1184 |
| 2211 | 309   | 204  | 440  | 565  | 311 | 948  | 280  | 39   | 1276 | 704  | 518  |
| 2212 | 211   | 89   | 147  | 354  | 265 | 614  | 344  | 36   | 63   | 644  | 341  |
| 3001 | 529   | 153  | 106  | 298  | 147 | 20   | 248  | 40   | 108  | 284  | 76   |
| 3301 | 156   | 69   | 544  | 708  | 380 | 1008 | 506  | 200  | 1523 | 1420 | 674  |
| 3302 | 392   | 275  | 580  | 408  | 251 | 1116 | 348  | 92   | 51   | 398  | 246  |
| 3401 | 794   | 572  | 159  | 122  | 88  | 1340 | 255  | 105  | 499  | 210  | 71   |
| 9001 | 228   | 108  | 938  | 732  | 118 | 1430 | 788  | 7    | 1253 | 1240 | 427  |
| 9002 | 309   | 203  | 1105 | 793  | 588 | 1202 | 568  | 66   | 28   | 690  | 441  |
| 9003 | 813   | 500  | 109  | 302  | 57  | 1582 | 252  | 53   | 432  | 464  | 129  |

|         |
|---------|
| Median  |
| of      |
| times   |
| after   |
| for the |
|         |
| +3rd Q  |
| 173     |
| 24      |
| 78      |
| 0       |
| 10      |
| 4       |
| 2       |
| 4       |
| 3       |
| 31      |
| 11      |
| 3       |
| 1       |
| 7       |
| 8       |
| 3       |
| 2       |
| 2       |
| 8       |
| 8       |
| 2       |
| 2       |
| 3       |
| 6       |
| 10      |
| 6       |
| 10      |
| 6       |
| 3       |
| 3       |
| 1       |
| 3       |
| 2       |
| 4       |
| 4       |
| 2       |
| 3       |
| 26      |
| 17      |
| 4       |

|    |
|----|
| 2  |
| 0  |
| 2  |
| 23 |
| 3  |
| 10 |
| 0  |
| 9  |
| 11 |
| 1  |
| 3  |
| 13 |
| 4  |
| 6  |
| 3  |
| 0  |
| 2  |
| 21 |
| 3  |
| 3  |
| 10 |
| 5  |
| 7  |
| 2  |
| 10 |
| 7  |
| 3  |
| 1  |
| 2  |
| 6  |
| 9  |
| 3  |
| 6  |
| 0  |
| 14 |
| 4  |
| 0  |
| 1  |
| 14 |
| 2  |
| 1  |
| 1  |
| 2  |
| 4  |
| 7  |
| 1  |
| 9  |
| 2  |
| 13 |
| 1  |

|    |
|----|
| 3  |
| 4  |
| 4  |
| 19 |
| 8  |
| 3  |
| 0  |
| 11 |
| 6  |
| 6  |
| 3  |
| 4  |
| 7  |
| 21 |
| 11 |
| 1  |
| 10 |
| 7  |
| 1  |
| 15 |
| 11 |
| 2  |
| 0  |
| 3  |
| 9  |
| 5  |
| 3  |
| 1  |
| 8  |
| 3  |
| 5  |
| 6  |
| 11 |
| 3  |
| 3  |
| 1  |
| 29 |
| 11 |
| 1  |
| 9  |
| 0  |
| 8  |
| 2  |
| 3  |
| 0  |
| 1  |
| 10 |
| 5  |
| 7  |
| 2  |

|    |
|----|
| 2  |
| 9  |
| 2  |
| 2  |
| 0  |
| 10 |
| 18 |
| 1  |
| 0  |
| 3  |
| 5  |
| 12 |
| 2  |
| 2  |
| 6  |
| 14 |
| 8  |
| 3  |
| 3  |
| 6  |
| 7  |
| 1  |
| 4  |
| 1  |
| 2  |
| 32 |
| 8  |
| 2  |
| 0  |
| 2  |
| 5  |
| 8  |
| 12 |
| 1  |
| 16 |
| 8  |
| 2  |
| 0  |
| 3  |
| 14 |
| 6  |
| 2  |
| 2  |
| 12 |
| 8  |
| 3  |
| 2  |
| 2  |
| 11 |
| 11 |

|    |
|----|
| 4  |
| 17 |
| 2  |
| 19 |
| 11 |
| 2  |
| 11 |
| 3  |
| 12 |
| 9  |
| 1  |
| 2  |
| 0  |
| 26 |
| 10 |
| 3  |
| 1  |
| 10 |
| 16 |
| 1  |
| 2  |
| 1  |
| 12 |
| 6  |
| 1  |
| 1  |
| 3  |
| 2  |
| 17 |
| 3  |
| 2  |
| 0  |
| 16 |
| 12 |
| 6  |
| 10 |
| 20 |
| 19 |
| 4  |
| 5  |
| 3  |
| 8  |
| 7  |
| 2  |
| 7  |
| 6  |
| 2  |
| 3  |
| 15 |
| 9  |

|     |
|-----|
| 4   |
| 8   |
| 2   |
| 7   |
| 23  |
| 3   |
| 0   |
| 3   |
| 9   |
| 7   |
| 9   |
| 2   |
| 4   |
| 20  |
| 18  |
| 6   |
| 11  |
| 10  |
| 27  |
| 5   |
| 13  |
| 2   |
| 24  |
| 45  |
| 3   |
| 8   |
| 1   |
| 12  |
| 8   |
| 7   |
| 0   |
| 3   |
| 19  |
| 6   |
| 1   |
| 2   |
| 4   |
| 15  |
| 3   |
| 2   |
| 6   |
| 25  |
| 2   |
| 2   |
| 8   |
| 103 |
| 60  |
| 2   |
| 6   |
| 10  |

|    |
|----|
| 10 |
| 1  |
| 1  |
| 1  |
| 8  |
| 0  |
| 10 |
| 8  |
| 1  |
| 3  |
| 6  |
| 4  |
| 5  |
| 0  |
| 1  |
| 15 |
| 45 |
| 8  |
| 0  |
| 4  |
| 2  |
| 12 |
| 5  |
| 21 |
| 3  |
| 13 |
| 3  |
| 5  |
| 1  |
| 1  |
| 16 |
| 21 |
| 1  |
| 3  |
| 3  |
| 1  |
| 8  |
| 2  |
| 9  |
| 10 |
| 6  |
| 0  |
| 1  |
| 8  |
| 13 |
| 3  |
| 8  |
| 5  |
| 0  |
| 14 |



|    |
|----|
| 8  |
| 10 |
| 10 |
| 1  |
| 23 |
| 4  |
| 7  |
| 7  |
| 2  |
| 5  |
| 4  |
| 8  |
| 5  |
| 4  |
| 1  |
| 1  |
| 7  |
| 1  |
| 2  |
| 1  |
| 3  |
| 7  |
| 0  |
| 2  |
| 0  |
| 1  |
| 4  |
| 6  |
| 1  |
| 0  |
| 0  |
| 15 |
| 6  |
| 1  |
| 0  |
| 0  |
| 9  |
| 10 |
| 3  |
| 3  |
| 1  |
| 8  |
| 6  |
| 1  |
| 5  |
| 1  |
| 1  |
| 22 |
| 0  |
| 1  |

|    |
|----|
| 3  |
| 3  |
| 1  |
| 1  |
| 1  |
| 0  |
| 5  |
| 7  |
| 2  |
| 7  |
| 2  |
| 1  |
| 0  |
| 3  |
| 6  |
| 6  |
| 0  |
| 0  |
| 2  |
| 7  |
| 6  |
| 0  |
| 2  |
| 1  |
| 8  |
| 9  |
| 2  |
| 1  |
| 4  |
| 3  |
| 4  |
| 5  |
| 2  |
| 0  |
| 1  |
| 8  |
| 12 |
| 1  |
| 9  |
| 4  |
| 1  |
| 2  |
| 3  |
| 1  |
| 1  |
| 1  |
| 2  |
| 14 |
| 2  |
| 1  |

|        |
|--------|
| 0      |
| 2      |
| 5      |
| 9      |
| 2      |
| 2      |
| 0      |
| 9      |
| 4      |
| 2      |
| 3      |
| 1      |
| 6      |
| 4      |
| 1      |
| 0      |
| 2      |
| 0      |
| 6      |
| 1      |
| 1      |
| 2      |
| 3      |
| 5      |
| 3      |
| 4      |
| 2      |
| 3      |
| 1      |
| 2      |
| 0      |
| 3      |
| 8      |
| 2      |
| 2      |
| 1      |
| 0      |
| 9      |
| 7      |
| 0      |
| 5      |
| 7      |
| 2      |
| 1      |
| 1      |
| 4      |
| 0      |
| or the |
|        |

|        |
|--------|
| +3rd Q |
| 175    |
| 62     |
| 47     |
| 5      |
| 0      |
| 6      |
| 21     |
| 8      |
| 7      |
| 44     |
| 10     |
| 23     |
| 5      |
| 1      |
| 6      |
| 7      |
| 28     |
| 2      |
| 4      |
| 28     |
| 3      |
| 31     |
| 2      |
| 3      |
| 3      |
| 3      |
| 3      |
| 36     |
| 2      |
| 1      |
| 4      |
| 41     |
| 2      |
| 13     |
| 2      |
| 4      |
| 7      |
| 1      |
| 4      |
| 3      |
| 1      |
| 5      |
| 2      |
| 1      |
| 10     |
| 6      |
| 23     |
| 1      |
| 6      |
| 6      |

|    |
|----|
| 27 |
| 5  |
| 4  |
| 30 |
| 2  |
| 30 |
| 3  |
| 4  |
| 15 |
| 2  |
| 1  |
| 4  |
| 13 |
| 54 |
| 3  |
| 5  |
| 8  |
| 2  |
| 3  |
| 3  |
| 1  |
| 2  |
| 9  |
| 9  |
| 4  |
| 5  |
| 7  |
| 17 |
| 5  |
| 3  |
| 10 |
| 2  |
| 3  |
| 1  |
| 2  |
| 10 |
| 2  |
| 5  |
| 2  |
| 7  |
| 5  |
| 34 |
| 5  |
| 2  |
| 12 |
| 11 |
| 13 |
| 2  |
| 8  |
| 6  |

|    |
|----|
| 6  |
| 9  |
| 6  |
| 2  |
| 30 |
| 4  |
| 2  |
| 2  |
| 6  |
| 5  |
| 1  |
| 9  |
| 4  |
| 24 |
| 0  |
| 5  |
| 2  |
| 2  |
| 1  |
| 9  |
| 1  |
| 2  |
| 1  |
| 10 |
| 8  |
| 35 |
| 4  |
| 2  |
| 4  |
| 2  |
| 10 |
| 9  |
| 3  |
| 4  |
| 3  |
| 6  |
| 1  |
| 5  |
| 10 |
| 3  |
| 16 |
| 5  |
| 11 |
| 3  |
| 1  |
| 12 |
| 3  |
| 5  |
| 4  |
| 16 |

|    |
|----|
| 1  |
| 3  |
| 14 |
| 4  |
| 2  |
| 2  |
| 2  |
| 3  |
| 5  |
| 24 |
| 3  |
| 3  |
| 3  |
| 2  |
| 7  |
| 10 |
| 2  |
| 10 |
| 5  |
| 22 |
| 17 |
| 4  |
| 5  |
| 19 |
| 1  |
| 11 |
| 8  |
| 5  |
| 2  |
| 13 |
| 3  |
| 7  |
| 4  |
| 4  |
| 6  |
| 8  |
| 1  |
| 2  |
| 2  |
| 7  |
| 10 |
| 1  |
| 39 |
| 2  |
| 3  |
| 6  |
| 2  |
| 15 |
| 2  |
| 6  |

|    |
|----|
| 4  |
| 2  |
| 23 |
| 2  |
| 11 |
| 7  |
| 5  |
| 28 |
| 9  |
| 36 |
| 2  |
| 1  |
| 2  |
| 2  |
| 9  |
| 3  |
| 13 |
| 3  |
| 3  |
| 14 |
| 3  |
| 23 |
| 6  |
| 7  |
| 9  |
| 21 |
| 2  |
| 10 |
| 6  |
| 5  |
| 0  |
| 7  |
| 2  |
| 5  |
| 4  |
| 4  |
| 6  |
| 2  |
| 2  |
| 4  |
| 2  |
| 7  |
| 19 |
| 1  |
| 8  |
| 14 |
| 5  |
| 30 |
| 8  |
| 10 |



|    |
|----|
| 4  |
| 3  |
| 3  |
| 4  |
| 9  |
| 17 |
| 9  |
| 49 |
| 54 |
| 4  |
| 10 |
| 18 |
| 5  |
| 0  |
| 44 |
| 2  |
| 22 |
| 2  |
| 8  |
| 2  |
| 7  |
| 4  |
| 2  |
| 1  |
| 8  |
| 4  |
| 13 |
| 16 |
| 5  |
| 2  |
| 26 |
| 2  |
| 11 |
| 3  |
| 4  |
| 1  |
| 67 |
| 9  |
| 3  |
| 5  |
| 3  |
| 2  |
| 2  |
| 9  |
| 6  |
| 6  |
| 17 |
| 2  |
| 9  |
| 14 |

|    |
|----|
| 2  |
| 3  |
| 8  |
| 7  |
| 14 |
| 13 |
| 7  |
| 54 |
| 10 |
| 38 |
| 4  |
| 4  |
| 9  |
| 5  |
| 42 |
| 1  |
| 2  |
| 1  |
| 2  |
| 13 |
| 3  |
| 4  |
| 17 |
| 3  |
| 4  |
| 3  |
| 4  |
| 4  |
| 4  |
| 5  |
| 4  |
| 5  |
| 5  |
| 5  |
| 4  |
| 3  |
| 11 |
| 8  |
| 2  |
| 6  |
| 2  |
| 4  |
| 6  |
| 3  |
| 6  |
| 2  |
| 60 |
| 5  |
| 4  |
| 5  |
| 10 |

|    |
|----|
| 37 |
| 1  |
| 1  |
| 3  |
| 5  |
| 62 |
| 3  |
| 3  |
| 5  |
| 2  |
| 27 |
| 1  |
| 3  |
| 6  |
| 1  |
| 24 |
| 3  |
| 3  |
| 6  |
| 2  |
| 30 |
| 1  |
| 8  |
| 11 |
| 3  |
| 20 |
| 2  |
| 4  |
| 8  |
| 4  |
| 33 |
| 2  |
| 4  |
| 3  |
| 2  |
| 5  |
| 3  |
| 2  |
| 42 |
| 2  |
| 28 |
| 2  |
| 1  |
| 4  |
| 1  |
| 22 |
| 2  |
| 3  |
| 6  |
| 2  |

|    |
|----|
| 2  |
| 10 |
| 7  |
| 22 |
| 8  |
| 4  |
| 8  |
| 5  |
| 23 |
| 2  |
| 2  |
| 14 |
| 3  |
| 24 |
| 2  |
| 2  |
| 15 |
| 2  |
| 31 |
| 7  |
| 3  |
| 4  |
| 22 |
| 2  |
| 5  |
| 3  |
| 2  |
| 29 |
| 1  |
| 4  |
| 6  |
| 34 |
| 2  |
| 2  |
| 4  |
| 1  |
| 19 |
| 3  |
| 7  |
| 3  |
| 4  |
| 5  |
| 1  |
| 4  |
| 5  |
| 2  |
| 31 |
| 10 |
| 6  |
| 8  |

|        |
|--------|
| 2      |
| 26     |
| 6      |
| 2      |
| 2      |
| 1      |
| 29     |
| 2      |
| 3      |
| 3      |
| 2      |
| 4      |
| 2      |
| 0      |
| 2      |
| 2      |
| 7      |
| 2      |
| 2      |
| 5      |
| 3      |
| 40     |
| 2      |
| 3      |
| 5      |
| 4      |
| 2      |
| 3      |
| 6      |
| 9      |
| 3      |
| 5      |
| 5      |
| 6      |
| 34     |
| 5      |
| 4      |
| 11     |
| or the |
|        |
| +3rd Q |
| 197    |
| 5      |
| 174    |
| 9      |
| 0      |
| 45     |
| 14     |
| 18     |

|    |
|----|
| 1  |
| 1  |
| 5  |
| 10 |
| 5  |
| 0  |
| 4  |
| 4  |
| 3  |
| 4  |
| 8  |
| 32 |
| 2  |
| 22 |
| 2  |
| 3  |
| 2  |
| 2  |
| 12 |
| 3  |
| 5  |
| 0  |
| 4  |
| 2  |
| 10 |
| 13 |
| 4  |
| 0  |
| 1  |
| 1  |
| 1  |
| 5  |
| 16 |
| 7  |
| 0  |
| 2  |
| 3  |
| 22 |
| 8  |
| 8  |
| 11 |
| 28 |
| 2  |
| 1  |
| 1  |
| 6  |
| 30 |
| 2  |
| 1  |
| 7  |

|    |
|----|
| 3  |
| 78 |
| 4  |
| 7  |
| 23 |
| 6  |
| 3  |
| 3  |
| 8  |
| 17 |
| 6  |
| 2  |
| 17 |
| 5  |
| 19 |
| 3  |
| 18 |
| 3  |
| 16 |
| 4  |
| 0  |
| 9  |
| 5  |
| 17 |
| 8  |
| 1  |
| 1  |
| 5  |
| 10 |
| 4  |
| 14 |
| 2  |
| 12 |
| 4  |
| 3  |
| 8  |
| 5  |
| 8  |
| 4  |
| 3  |
| 3  |
| 2  |
| 29 |
| 10 |
| 2  |
| 39 |
| 3  |
| 3  |
| 4  |
| 6  |

|    |
|----|
| 8  |
| 3  |
| 16 |
| 2  |
| 2  |
| 5  |
| 60 |
| 9  |
| 2  |
| 4  |
| 2  |
| 1  |
| 30 |
| 1  |
| 2  |
| 5  |
| 7  |
| 5  |
| 9  |
| 11 |
| 7  |
| 30 |
| 13 |
| 6  |
| 24 |
| 13 |
| 8  |
| 4  |
| 3  |
| 6  |
| 0  |
| 5  |
| 5  |
| 8  |
| 2  |
| 8  |
| 3  |
| 1  |
| 3  |
| 3  |
| 3  |
| 1  |
| 6  |
| 3  |
| 3  |
| 2  |
| 3  |
| 1  |
| 4  |
| 6  |



|    |
|----|
| 21 |
| 3  |
| 5  |
| 4  |
| 4  |
| 27 |
| 20 |
| 13 |
| 7  |
| 4  |
| 20 |
| 3  |
| 3  |
| 3  |
| 17 |
| 2  |
| 12 |
| 3  |
| 3  |
| 5  |
| 6  |
| 3  |
| 4  |
| 3  |
| 38 |
| 7  |
| 10 |
| 2  |
| 19 |
| 5  |
| 3  |
| 4  |
| 5  |
| 23 |
| 5  |
| 1  |
| 12 |
| 3  |
| 1  |
| 3  |
| 3  |
| 3  |
| 13 |
| 3  |
| 32 |
| 2  |
| 4  |
| 5  |
| 4  |
| 6  |
| 4  |

|    |
|----|
| 5  |
| 6  |
| 8  |
| 2  |
| 4  |
| 11 |
| 4  |
| 5  |
| 7  |
| 2  |
| 4  |
| 3  |
| 3  |
| 4  |
| 4  |
| 3  |
| 29 |
| 4  |
| 8  |
| 6  |
| 5  |
| 2  |
| 1  |
| 7  |
| 5  |
| 8  |
| 4  |
| 8  |
| 5  |
| 3  |
| 2  |
| 6  |
| 6  |
| 0  |
| 5  |
| 1  |
| 4  |
| 6  |
| 2  |
| 5  |
| 5  |
| 11 |
| 6  |
| 1  |
| 3  |
| 2  |
| 8  |
| 16 |
| 19 |
| 41 |

|     |
|-----|
| 12  |
| 0   |
| 4   |
| 10  |
| 7   |
| 12  |
| 6   |
| 1   |
| 0   |
| 4   |
| 3   |
| 3   |
| 2   |
| 3   |
| 80  |
| 3   |
| 2   |
| 17  |
| 4   |
| 7   |
| 3   |
| 22  |
| 7   |
| 105 |
| 7   |
| 9   |
| 16  |
| 38  |
| 10  |
| 7   |
| 1   |
| 3   |
| 4   |
| 4   |
| 7   |
| 3   |
| 6   |
| 3   |
| 7   |
| 11  |
| 2   |
| 1   |
| 5   |
| 8   |
| 18  |
| 19  |
| 49  |
| 10  |
| 8   |
| 9   |

|    |
|----|
| 32 |
| 4  |
| 2  |
| 6  |
| 3  |
| 48 |
| 4  |
| 1  |
| 10 |
| 8  |
| 14 |
| 2  |
| 3  |
| 11 |
| 5  |
| 2  |
| 0  |
| 1  |
| 4  |
| 4  |
| 2  |
| 4  |
| 6  |
| 1  |
| 4  |
| 2  |
| 6  |
| 2  |
| 2  |
| 7  |
| 4  |
| 9  |
| 2  |
| 4  |
| 11 |
| 9  |
| 25 |
| 9  |
| 1  |
| 7  |
| 4  |
| 26 |
| 2  |
| 4  |
| 15 |
| 2  |
| 32 |
| 5  |
| 6  |
| 6  |

|     |
|-----|
| 3   |
| 32  |
| 4   |
| 2   |
| 8   |
| 3   |
| 0   |
| 5   |
| 2   |
| 12  |
| 3   |
| 25  |
| 8   |
| 6   |
| 8   |
| 5   |
| 11  |
| 12  |
| 1   |
| 3   |
| 4   |
| 25  |
| 4   |
| 6   |
| 6   |
| 1   |
| 1   |
| 5   |
| 9   |
| 640 |
| 4   |
| 95  |
| 8   |
| 2   |
| 5   |
| 0   |
| 23  |
| 6   |
| 3   |
| 12  |
| 3   |
| 5   |
| 10  |
| 5   |
| 24  |
| 0   |
| 3   |
| 5   |
| 2   |
| 22  |

|    |
|----|
| 5  |
| 5  |
| 6  |
| 6  |
| 20 |
| 2  |
| 1  |
| 9  |
| 2  |
| 6  |
| 6  |
| 8  |
| 4  |
| 22 |
| 11 |
| 3  |
| 5  |
| 68 |
| 37 |
| 4  |
| 11 |
| 10 |
| 55 |
| 5  |
| 4  |
| 3  |
| 4  |
| 27 |
| 3  |
| 14 |
| 3  |
| 8  |
| 25 |
| 1  |
| 52 |
| 8  |
| 3  |
| 26 |
| 7  |
| 7  |
| 6  |
| 4  |
| 27 |
| 3  |
| 7  |
| 4  |
| 2  |
| 25 |
| 9  |
| 2  |

|    |
|----|
| 10 |
| 4  |
| 28 |
| 44 |
| 6  |
| 16 |
| 6  |
| 18 |
| 4  |
| 3  |
| 8  |
| 5  |
| 35 |
| 3  |
| 16 |
| 8  |
| 9  |
| 25 |
| 4  |
| 11 |
| 4  |
| 4  |
| 2  |
| 2  |
| 3  |
| 31 |
| 9  |
| 2  |
| 2  |

or the

|        |
|--------|
|        |
| +3rd Q |
| 1      |
| 97     |
| 34     |
| 2      |
| 1      |
| 33     |
| 17     |
| 1      |
| 1      |
| 426    |
| 62     |
| 17     |
| 0      |
| 2      |
| 27     |
| 17     |
| 13     |

|    |
|----|
| 1  |
| 1  |
| 6  |
| 9  |
| 27 |
| 2  |
| 3  |
| 5  |
| 5  |
| 26 |
| 1  |
| 6  |
| 18 |
| 32 |
| 2  |
| 50 |
| 24 |
| 14 |
| 3  |
| 2  |
| 2  |
| 1  |
| 10 |
| 17 |
| 1  |
| 2  |
| 10 |
| 10 |
| 10 |
| 2  |
| 0  |
| 13 |
| 8  |
| 1  |
| 3  |
| 12 |
| 4  |
| 11 |
| 1  |
| 2  |
| 7  |
| 5  |
| 1  |
| 2  |
| 3  |
| 7  |
| 1  |
| 2  |
| 1  |
| 5  |



|     |
|-----|
| 4   |
| 2   |
| 3   |
| 9   |
| 5   |
| 11  |
| 0   |
| 20  |
| 7   |
| 4   |
| 2   |
| 3   |
| 311 |
| 2   |
| 334 |
| 1   |
| 1   |
| 9   |
| 3   |
| 14  |
| 2   |
| 57  |
| 13  |
| 4   |
| 1   |
| 7   |
| 5   |
| 13  |
| 5   |
| 2   |
| 1   |
| 6   |
| 22  |
| 19  |
| 1   |
| 3   |
| 81  |
| 13  |
| 1   |
| 3   |
| 0   |
| 15  |
| 6   |
| 10  |
| 9   |
| 22  |
| 1   |
| 3   |
| 7   |
| 1   |

|     |
|-----|
| 6   |
| 7   |
| 8   |
| 15  |
| 8   |
| 11  |
| 29  |
| 3   |
| 0   |
| 1   |
| 8   |
| 6   |
| 10  |
| 1   |
| 5   |
| 27  |
| 52  |
| 11  |
| 1   |
| 5   |
| 153 |
| 7   |
| 17  |
| 1   |
| 11  |
| 6   |
| 4   |
| 1   |
| 2   |
| 21  |
| 37  |
| 107 |
| 3   |
| 4   |
| 8   |
| 415 |
| 5   |
| 1   |
| 1   |
| 9   |
| 186 |
| 5   |
| 0   |
| 2   |
| 12  |
| 7   |
| 6   |
| 0   |
| 5   |
| 4   |

|      |
|------|
| 2    |
| 12   |
| 0    |
| 6    |
| 12   |
| 9    |
| 0    |
| 5    |
| 1    |
| 3    |
| 2    |
| 2    |
| 9    |
| 8    |
| 6    |
| 14   |
| 9    |
| 4    |
| 6    |
| 3    |
| 0    |
| 3    |
| 9    |
| 6    |
| 9    |
| 0    |
| 6    |
| 15   |
| 222  |
| 11   |
| 2    |
| 3    |
| 1896 |
| 6    |
| 2    |
| 3    |
| 13   |
| 7    |
| 1    |
| 7    |
| 7    |
| 75   |
| 11   |
| 10   |
| 0    |
| 11   |
| 15   |
| 8    |
| 5    |
| 3    |

|     |
|-----|
| 6   |
| 16  |
| 17  |
| 14  |
| 1   |
| 2   |
| 5   |
| 32  |
| 1   |
| 9   |
| 12  |
| 9   |
| 7   |
| 0   |
| 5   |
| 11  |
| 1   |
| 9   |
| 5   |
| 10  |
| 1   |
| 11  |
| 9   |
| 5   |
| 8   |
| 0   |
| 8   |
| 16  |
| 13  |
| 10  |
| 1   |
| 4   |
| 4   |
| 3   |
| 13  |
| 1   |
| 1   |
| 8   |
| 18  |
| 30  |
| 151 |
| 16  |
| 11  |
| 7   |
| 0   |
| 9   |
| 65  |
| 6   |
| 3   |
| 1   |

|     |
|-----|
| 6   |
| 8   |
| 2   |
| 3   |
| 1   |
| 12  |
| 8   |
| 6   |
| 6   |
| 6   |
| 14  |
| 3   |
| 5   |
| 1   |
| 62  |
| 7   |
| 4   |
| 147 |
| 28  |
| 13  |
| 4   |
| 1   |
| 4   |
| 14  |
| 5   |
| 3   |
| 13  |
| 7   |
| 4   |
| 13  |
| 12  |
| 5   |
| 2   |
| 10  |
| 14  |
| 11  |
| 12  |
| 0   |
| 7   |
| 112 |
| 19  |
| 14  |
| 1   |
| 102 |
| 5   |
| 3   |
| 37  |
| 0   |
| 4   |
| 10  |

|     |
|-----|
| 0   |
| 314 |
| 1   |
| 12  |
| 153 |
| 6   |
| 5   |
| 1   |
| 4   |
| 17  |
| 0   |
| 5   |
| 18  |
| 7   |
| 6   |
| 1   |
| 6   |
| 11  |
| 7   |
| 2   |
| 6   |
| 1   |
| 3   |
| 3   |
| 5   |
| 3   |
| 9   |
| 7   |
| 2   |
| 3   |
| 7   |
| 2   |
| 2   |
| 1   |
| 4   |
| 4   |
| 6   |
| 2   |
| 1   |
| 41  |
| 9   |
| 5   |
| 4   |
| 1   |
| 20  |
| 7   |
| 8   |
| 1   |
| 0   |
| 9   |

|     |
|-----|
| 10  |
| 1   |
| 4   |
| 0   |
| 10  |
| 9   |
| 5   |
| 0   |
| 1   |
| 6   |
| 6   |
| 4   |
| 4   |
| 1   |
| 3   |
| 4   |
| 2   |
| 13  |
| 1   |
| 1   |
| 366 |
| 1   |
| 14  |
| 0   |
| 8   |
| 5   |
| 2   |
| 1   |
| 1   |
| 6   |
| 3   |
| 4   |
| 9   |
| 12  |
| 4   |
| 2   |
| 0   |
| 3   |
| 14  |
| 3   |
| 2   |
| 0   |
| 7   |
| 5   |
| 1   |
| 4   |
| 1   |
| 2   |
| 1   |
| 2   |

|     |
|-----|
| 5   |
| 0   |
| 7   |
| 4   |
| 1   |
| 0   |
| 27  |
| 26  |
| 133 |
| 85  |
| 0   |
| 39  |
| 6   |
| 3   |
| 0   |
| 13  |
| 7   |
| 1   |
| 2   |
| 0   |
| 11  |
| 8   |
| 3   |
| 4   |
| 0   |
| 20  |
| 5   |
| 2   |
| 0   |
| 0   |
| 5   |
| 8   |
| 6   |
| 1   |
| 1   |
| 12  |
| 4   |
| 1   |
| 3   |
| 1   |
| 8   |
| 8   |
| 4   |
| 4   |
| 1   |
| 13  |
| 11  |
| 5   |
| 18  |
| 0   |



|    |
|----|
| 6  |
| 8  |
| 8  |
| 1  |
| 0  |
| 14 |
| 8  |
| 1  |
| 1  |
| 0  |
| 12 |
| 2  |
| 5  |
| 6  |
| 7  |
| 10 |
| 5  |
| 0  |
| 1  |
| 1  |

or the

|        |
|--------|
|        |
| +3rd Q |
| 6      |
| 22     |
| 105    |
| 15     |
| 21     |
| 7      |
| 5      |
| 14     |
| 11     |
| 9      |
| 12     |
| 25     |
| 3      |
| 3      |
| 10     |
| 2      |
| 29     |
| 2      |
| 22     |
| 7      |
| 6      |
| 25     |
| 6      |
| 3      |
| 9      |
| 3      |

|     |
|-----|
| 5   |
| 54  |
| 3   |
| 5   |
| 18  |
| 1   |
| 14  |
| 2   |
| 3   |
| 29  |
| 1   |
| 0   |
| 11  |
| 5   |
| 22  |
| 5   |
| 2   |
| 2   |
| 2   |
| 22  |
| 2   |
| 2   |
| 5   |
| 9   |
| 4   |
| 9   |
| 2   |
| 4   |
| 36  |
| 6   |
| 3   |
| 24  |
| 3   |
| 2   |
| 6   |
| 7   |
| 16  |
| 3   |
| 5   |
| 3   |
| 2   |
| 19  |
| 3   |
| 5   |
| 8   |
| 9   |
| 2   |
| 3   |
| 15  |
| 218 |

|     |
|-----|
| 23  |
| 3   |
| 6   |
| 11  |
| 3   |
| 17  |
| 32  |
| 3   |
| 6   |
| 2   |
| 27  |
| 4   |
| 16  |
| 1   |
| 9   |
| 2   |
| 4   |
| 4   |
| 10  |
| 14  |
| 5   |
| 6   |
| 5   |
| 4   |
| 33  |
| 4   |
| 4   |
| 18  |
| 4   |
| 0   |
| 9   |
| 7   |
| 4   |
| 9   |
| 25  |
| 5   |
| 8   |
| 4   |
| 12  |
| 119 |
| 12  |
| 7   |
| 10  |
| 2   |
| 0   |
| 10  |
| 13  |
| 3   |
| 9   |
| 4   |

|     |
|-----|
| 9   |
| 9   |
| 3   |
| 1   |
| 2   |
| 8   |
| 146 |
| 69  |
| 25  |
| 25  |
| 8   |
| 285 |
| 38  |
| 17  |
| 14  |
| 14  |
| 3   |
| 3   |
| 49  |
| 9   |
| 9   |
| 4   |
| 235 |
| 4   |
| 11  |
| 8   |
| 2   |
| 28  |
| 5   |
| 2   |
| 138 |
| 29  |
| 11  |
| 5   |
| 3   |
| 11  |
| 5   |
| 32  |
| 25  |
| 24  |
| 3   |
| 8   |
| 33  |
| 2   |
| 4   |
| 7   |
| 20  |
| 6   |
| 6   |
| 6   |

|     |
|-----|
| 4   |
| 18  |
| 1   |
| 12  |
| 9   |
| 5   |
| 31  |
| 5   |
| 14  |
| 4   |
| 1   |
| 1   |
| 3   |
| 7   |
| 3   |
| 2   |
| 6   |
| 5   |
| 8   |
| 11  |
| 16  |
| 22  |
| 17  |
| 386 |
| 4   |
| 2   |
| 13  |
| 19  |
| 8   |
| 106 |
| 5   |
| 9   |
| 6   |
| 5   |
| 4   |
| 2   |
| 3   |
| 0   |
| 3   |
| 9   |
| 1   |
| 7   |
| 9   |
| 38  |
| 4   |
| 4   |
| 7   |
| 2   |
| 6   |
| 3   |

|     |
|-----|
| 5   |
| 6   |
| 2   |
| 11  |
| 4   |
| 1   |
| 7   |
| 10  |
| 11  |
| 5   |
| 15  |
| 3   |
| 8   |
| 6   |
| 13  |
| 8   |
| 4   |
| 6   |
| 21  |
| 2   |
| 19  |
| 5   |
| 4   |
| 8   |
| 6   |
| 24  |
| 4   |
| 7   |
| 3   |
| 206 |
| 33  |
| 96  |
| 9   |
| 6   |
| 18  |
| 2   |
| 5   |
| 31  |
| 6   |
| 33  |
| 1   |
| 6   |
| 3   |
| 3   |
| 6   |
| 2   |
| 8   |
| 10  |
| 15  |
| 2   |

|     |
|-----|
| 11  |
| 4   |
| 3   |
| 0   |
| 4   |
| 174 |
| 5   |
| 24  |
| 660 |
| 14  |
| 12  |
| 9   |
| 3   |
| 2   |
| 5   |
| 27  |
| 12  |
| 15  |
| 2   |
| 11  |
| 0   |
| 9   |
| 22  |
| 2   |
| 1   |
| 10  |
| 3   |
| 12  |
| 579 |
| 5   |
| 36  |
| 8   |
| 25  |
| 0   |
| 1   |
| 6   |
| 18  |
| 9   |
| 5   |
| 2   |
| 13  |
| 5   |
| 21  |
| 2   |
| 11  |
| 22  |
| 5   |
| 4   |
| 2   |
| 7   |

|    |
|----|
| 10 |
| 0  |
| 7  |
| 5  |
| 5  |
| 2  |
| 4  |
| 2  |
| 7  |
| 10 |
| 6  |
| 1  |
| 1  |
| 5  |
| 1  |
| 6  |
| 2  |
| 10 |
| 88 |
| 6  |
| 3  |
| 8  |
| 6  |
| 60 |
| 7  |
| 0  |
| 12 |
| 13 |
| 28 |
| 1  |
| 9  |
| 5  |
| 4  |
| 27 |
| 3  |
| 4  |
| 3  |
| 2  |
| 55 |
| 6  |
| 2  |
| 5  |
| 4  |
| 9  |
| 5  |
| 1  |
| 9  |
| 1  |
| 21 |
| 43 |



|     |
|-----|
| 2   |
| 11  |
| 5   |
| 19  |
| 2   |
| 3   |
| 2   |
| 5   |
| 19  |
| 7   |
| 6   |
| 743 |
| 5   |
| 51  |
| 1   |
| 3   |
| 9   |
| 2   |
| 7   |
| 45  |
| 7   |
| 4   |
| 99  |
| 5   |
| 5   |
| 5   |
| 19  |
| 7   |
| 4   |
| 384 |
| 2   |
| 4   |
| 16  |
| 2   |
| 12  |
| 21  |
| 12  |
| 2   |
| 12  |
| 16  |
| 31  |
| 32  |
| 11  |
| 2   |
| 3   |
| 27  |
| 9   |
| 7   |
| 5   |
| 32  |

|    |
|----|
| 29 |
| 7  |
| 8  |
| 16 |
| 23 |
| 3  |
| 4  |
| 5  |
| 6  |
| 6  |
| 4  |
| 5  |
| 5  |
| 7  |
| 43 |
| 4  |
| 0  |
| 5  |
| 5  |
| 27 |
| 4  |
| 8  |
| 4  |
| 8  |
| 28 |
| 4  |
| 6  |
| 4  |
| 17 |
| 3  |
| 1  |
| 5  |
| 8  |
| 7  |
| 33 |
| 31 |
| 10 |
| 5  |
| 1  |
| 57 |
| 5  |
| 2  |
| 8  |
| 5  |
| 36 |
| 2  |
| 8  |
| 5  |
| 7  |
| 14 |

|    |
|----|
| 2  |
| 5  |
| 3  |
| 2  |
| 9  |
| 3  |
| 7  |
| 38 |
| 8  |
| 4  |
| 14 |

or the  
5,

|        |
|--------|
|        |
| +3rd Q |
| 5      |
| 169    |
| 42     |
| 41     |
| 6      |
| 111    |
| 75     |
| 19     |
| 8      |
| 134    |
| 17     |
| 48     |
| 4      |
| 4      |
| 67     |
| 28     |
| 30     |
| 4      |
| 604    |
| 78     |
| 18     |
| 64     |
| 8      |
| 3      |
| 24     |
| 18     |
| 51     |
| 55     |
| 42     |
| 5      |
| 55     |
| 16     |
| 29     |
| 28     |

|     |
|-----|
| 201 |
| 39  |
| 13  |
| 6   |
| 34  |
| 14  |
| 31  |
| 6   |
| 3   |
| 52  |
| 1   |
| 62  |
| 5   |
| 35  |
| 30  |
| 56  |
| 9   |
| 4   |
| 28  |
| 14  |
| 29  |
| 9   |
| 24  |
| 20  |
| 11  |
| 3   |
| 4   |
| 29  |
| 18  |
| 7   |
| 13  |
| 25  |
| 23  |
| 40  |
| 9   |
| 39  |
| 15  |
| 15  |
| 4   |
| 3   |
| 14  |
| 27  |
| 30  |
| 3   |
| 5   |
| 13  |
| 21  |
| 8   |
| 19  |
| 5   |

|      |
|------|
| 15   |
| 14   |
| 18   |
| 2    |
| 19   |
| 18   |
| 76   |
| 10   |
| 9    |
| 7    |
| 1127 |
| 7    |
| 4    |
| 13   |
| 25   |
| 22   |
| 42   |
| 5    |
| 10   |
| 105  |
| 32   |
| 8    |
| 16   |
| 10   |
| 10   |
| 7    |
| 25   |
| 6    |
| 36   |
| 3    |
| 12   |
| 21   |
| 7    |
| 12   |
| 31   |
| 12   |
| 57   |
| 2    |
| 26   |
| 19   |
| 6    |
| 2    |
| 14   |
| 29   |
| 9    |
| 10   |
| 3    |
| 11   |
| 19   |
| 95   |

|    |
|----|
| 30 |
| 23 |
| 44 |
| 67 |
| 20 |
| 21 |
| 13 |
| 23 |
| 93 |
| 2  |
| 7  |
| 6  |
| 19 |
| 16 |
| 54 |
| 12 |
| 22 |
| 20 |
| 9  |
| 23 |
| 5  |
| 6  |
| 15 |
| 47 |
| 41 |
| 3  |
| 4  |
| 25 |
| 3  |
| 12 |
| 7  |
| 5  |
| 16 |
| 8  |
| 24 |
| 3  |
| 5  |
| 17 |
| 31 |
| 9  |
| 5  |
| 10 |
| 8  |
| 39 |
| 13 |
| 5  |
| 31 |
| 14 |
| 25 |
| 11 |

|    |
|----|
| 17 |
| 8  |
| 7  |
| 4  |
| 13 |
| 7  |
| 6  |
| 23 |
| 5  |
| 7  |
| 38 |
| 7  |
| 18 |
| 4  |
| 16 |
| 27 |
| 15 |
| 63 |
| 16 |
| 29 |
| 9  |
| 13 |
| 33 |
| 21 |
| 31 |
| 17 |
| 20 |
| 5  |
| 9  |
| 21 |
| 9  |
| 32 |
| 4  |
| 9  |
| 5  |
| 24 |
| 43 |
| 2  |
| 11 |
| 13 |
| 4  |
| 1  |
| 21 |
| 37 |
| 9  |
| 14 |
| 4  |
| 3  |
| 7  |
| 5  |

|     |
|-----|
| 14  |
| 17  |
| 10  |
| 2   |
| 2   |
| 3   |
| 22  |
| 42  |
| 6   |
| 23  |
| 15  |
| 13  |
| 21  |
| 5   |
| 9   |
| 7   |
| 7   |
| 22  |
| 4   |
| 16  |
| 11  |
| 17  |
| 23  |
| 127 |
| 39  |
| 28  |
| 13  |
| 17  |
| 17  |
| 21  |
| 12  |
| 26  |
| 4   |
| 8   |
| 6   |
| 12  |
| 21  |
| 6   |
| 15  |
| 27  |
| 8   |
| 19  |
| 20  |
| 14  |
| 15  |
| 29  |
| 3   |
| 138 |
| 19  |
| 16  |



|     |
|-----|
| 2   |
| 14  |
| 90  |
| 19  |
| 3   |
| 102 |
| 4   |
| 3   |
| 10  |
| 28  |
| 12  |
| 9   |
| 24  |
| 32  |
| 14  |
| 4   |
| 11  |
| 16  |
| 42  |
| 51  |
| 70  |
| 12  |
| 40  |
| 11  |
| 35  |
| 2   |
| 7   |
| 7   |
| 2   |
| 40  |
| 2   |
| 13  |
| 23  |
| 30  |
| 10  |
| 8   |
| 18  |
| 22  |
| 4   |
| 9   |
| 2   |
| 20  |
| 21  |
| 7   |
| 5   |
| 39  |
| 13  |
| 29  |
| 3   |
| 9   |

|     |
|-----|
| 15  |
| 17  |
| 13  |
| 7   |
| 7   |
| 8   |
| 12  |
| 7   |
| 234 |
| 19  |
| 71  |
| 2   |
| 14  |
| 20  |
| 16  |
| 34  |
| 2   |
| 16  |
| 14  |
| 42  |
| 33  |
| 4   |
| 33  |
| 11  |
| 7   |
| 36  |
| 3   |
| 52  |
| 21  |
| 5   |
| 10  |
| 4   |
| 29  |
| 25  |
| 4   |
| 50  |
| 1   |
| 9   |
| 22  |
| 12  |
| 75  |
| 66  |
| 3   |
| 15  |
| 18  |
| 42  |
| 5   |
| 5   |
| 9   |
| 14  |

|     |
|-----|
| 3   |
| 2   |
| 33  |
| 399 |
| 23  |
| 284 |
| 2   |
| 116 |
| 17  |
| 8   |
| 17  |
| 2   |
| 44  |
| 14  |
| 39  |
| 29  |
| 10  |
| 3   |
| 11  |
| 2   |
| 6   |
| 313 |
| 4   |
| 53  |
| 0   |
| 12  |
| 2   |
| 12  |
| 8   |
| 2   |
| 6   |
| 31  |
| 22  |
| 59  |
| 5   |
| 9   |
| 13  |
| 13  |
| 25  |
| 85  |
| 6   |
| 103 |
| 214 |
| 3   |
| 21  |
| 88  |
| 47  |
| 4   |
| 24  |
| 13  |

|    |
|----|
| 6  |
| 8  |
| 1  |
| 18 |
| 15 |
| 21 |
| 18 |
| 1  |
| 50 |
| 21 |
| 22 |
| 49 |
| 2  |
| 22 |
| 23 |
| 20 |
| 21 |
| 2  |
| 33 |
| 17 |
| 12 |
| 27 |
| 0  |
| 18 |
| 23 |
| 27 |
| 30 |
| 22 |
| 20 |
| 23 |
| 22 |
| 40 |
| 1  |
| 19 |
| 35 |
| 18 |
| 58 |
| 0  |
| 60 |
| 6  |
| 7  |
| 24 |
| 1  |
| 25 |
| 17 |
| 15 |
| 63 |
| 32 |
| 24 |
| 42 |

|        |
|--------|
| 2      |
| 64     |
| 39     |
| or the |
|        |
| +3rd Q |
| 242    |
| 98     |
| 206    |
| 38     |
| 2      |
| 13     |
| 24     |
| 16     |
| 9      |
| 14     |
| 22     |
| 50     |
| 7      |
| 4      |
| 16     |
| 9      |
| 9      |
| 5      |
| 29     |
| 7      |
| 11     |
| 36     |
| 5      |
| 3      |
| 2      |
| 6      |
| 28     |
| 7      |
| 13     |
| 8      |
| 40     |
| 12     |
| 12     |
| 7      |
| 10     |
| 25     |
| 5      |
| 12     |
| 5      |
| 11     |
| 3      |
| 1      |

|    |
|----|
| 8  |
| 4  |
| 7  |
| 37 |
| 8  |
| 12 |
| 30 |
| 22 |
| 2  |
| 2  |
| 4  |
| 13 |
| 33 |
| 3  |
| 4  |
| 5  |
| 3  |
| 1  |
| 6  |
| 1  |
| 4  |
| 0  |
| 8  |
| 16 |
| 2  |
| 26 |
| 8  |
| 8  |
| 19 |
| 7  |
| 29 |
| 25 |
| 8  |
| 10 |
| 71 |
| 4  |
| 7  |
| 9  |
| 3  |
| 27 |
| 4  |
| 3  |
| 16 |
| 6  |
| 25 |
| 5  |
| 4  |
| 9  |
| 38 |
| 7  |

|     |
|-----|
| 11  |
| 5   |
| 9   |
| 10  |
| 7   |
| 12  |
| 10  |
| 7   |
| 32  |
| 3   |
| 10  |
| 67  |
| 14  |
| 3   |
| 9   |
| 6   |
| 7   |
| 3   |
| 9   |
| 6   |
| 28  |
| 4   |
| 5   |
| 19  |
| 5   |
| 6   |
| 12  |
| 2   |
| 30  |
| 15  |
| 2   |
| 14  |
| 17  |
| 12  |
| 3   |
| 3   |
| 8   |
| 22  |
| 2   |
| 4   |
| 12  |
| 24  |
| 13  |
| 8   |
| 15  |
| 251 |
| 7   |
| 27  |
| 2   |
| 4   |

|     |
|-----|
| 6   |
| 11  |
| 13  |
| 4   |
| 9   |
| 68  |
| 93  |
| 23  |
| 9   |
| 5   |
| 971 |
| 15  |
| 3   |
| 2   |
| 44  |
| 206 |
| 2   |
| 4   |
| 8   |
| 1   |
| 5   |
| 29  |
| 83  |
| 6   |
| 16  |
| 54  |
| 40  |
| 6   |
| 8   |
| 5   |
| 4   |
| 17  |
| 20  |
| 13  |
| 3   |
| 32  |
| 5   |
| 10  |
| 7   |
| 4   |
| 28  |
| 12  |
| 12  |
| 3   |
| 19  |
| 4   |
| 9   |
| 9   |
| 4   |
| 53  |



|     |
|-----|
| 2   |
| 3   |
| 7   |
| 9   |
| 2   |
| 8   |
| 5   |
| 126 |
| 4   |
| 3   |
| 4   |
| 6   |
| 5   |
| 5   |
| 39  |
| 6   |
| 45  |
| 5   |
| 21  |
| 6   |
| 6   |
| 10  |
| 5   |
| 30  |
| 10  |
| 5   |
| 12  |
| 33  |
| 35  |
| 8   |
| 5   |
| 12  |
| 1   |
| 17  |
| 2   |
| 23  |
| 5   |
| 23  |
| 2   |
| 4   |
| 5   |
| 5   |
| 4   |
| 8   |
| 28  |
| 3   |
| 2   |
| 15  |
| 7   |
| 27  |

|     |
|-----|
| 6   |
| 2   |
| 8   |
| 7   |
| 28  |
| 3   |
| 2   |
| 6   |
| 7   |
| 27  |
| 8   |
| 54  |
| 10  |
| 24  |
| 42  |
| 149 |
| 49  |
| 5   |
| 13  |
| 5   |
| 26  |
| 24  |
| 2   |
| 53  |
| 8   |
| 2   |
| 4   |
| 1   |
| 2   |
| 6   |
| 6   |
| 4   |
| 7   |
| 16  |
| 9   |
| 5   |
| 5   |
| 96  |
| 8   |
| 14  |
| 3   |
| 18  |
| 82  |
| 15  |
| 21  |
| 3   |
| 1   |
| 10  |
| 9   |
| 7   |

|    |
|----|
| 9  |
| 9  |
| 7  |
| 17 |
| 6  |
| 10 |
| 34 |
| 2  |
| 9  |
| 9  |
| 5  |
| 18 |
| 45 |
| 7  |
| 23 |
| 11 |
| 5  |
| 5  |
| 6  |
| 16 |
| 3  |
| 32 |
| 3  |
| 3  |
| 7  |
| 6  |
| 12 |
| 2  |
| 4  |
| 23 |
| 6  |
| 28 |
| 5  |
| 12 |
| 3  |
| 4  |
| 2  |
| 16 |
| 5  |
| 23 |
| 11 |
| 10 |
| 6  |
| 3  |
| 4  |
| 7  |
| 5  |
| 4  |
| 4  |
| 9  |

|     |
|-----|
| 33  |
| 6   |
| 59  |
| 6   |
| 6   |
| 6   |
| 10  |
| 36  |
| 1   |
| 3   |
| 9   |
| 4   |
| 32  |
| 2   |
| 32  |
| 0   |
| 2   |
| 31  |
| 3   |
| 49  |
| 6   |
| 8   |
| 28  |
| 5   |
| 10  |
| 8   |
| 6   |
| 29  |
| 5   |
| 13  |
| 4   |
| 52  |
| 48  |
| 24  |
| 3   |
| 5   |
| 4   |
| 173 |
| 1   |
| 3   |
| 7   |
| 4   |
| 38  |
| 5   |
| 5   |
| 380 |
| 7   |
| 72  |
| 1   |
| 3   |

|     |
|-----|
| 4   |
| 2   |
| 39  |
| 1   |
| 7   |
| 2   |
| 1   |
| 10  |
| 4   |
| 8   |
| 25  |
| 2   |
| 9   |
| 41  |
| 10  |
| 28  |
| 3   |
| 6   |
| 3   |
| 7   |
| 22  |
| 1   |
| 2   |
| 437 |
| 12  |
| 47  |
| 4   |
| 69  |
| 8   |
| 28  |
| 3   |
| 34  |
| 9   |
| 17  |
| 126 |
| 2   |
| 16  |
| 4   |
| 43  |
| 2   |
| 2   |
| 5   |
| 10  |
| 20  |
| 3   |
| 6   |
| 5   |
| 7   |
| 4   |
| 1   |

|        |
|--------|
| 27     |
| 14     |
| 8      |
| 30     |
| 2      |
| 14     |
| 5      |
| 7      |
| 34     |
| 3      |
| 16     |
| 10     |
| 6      |
| 22     |
| 0      |
| 8      |
| 5      |
| 3      |
| 24     |
| 38     |
| 8      |
| 8      |
| 4      |
| 12     |
| 0      |
| 5      |
| 10     |
| 5      |
| 40     |
| 2      |
| 21     |
| 8      |
| 12     |
| 7      |
| 1      |
| 8      |
| 4      |
| 6      |
| 12     |
| 13     |
| 5      |
| 39     |
| 0      |
| 14     |
| 1      |
| or the |
|        |
| +3rd Q |

|     |
|-----|
| 37  |
| 132 |
| 95  |
| 29  |
| 4   |
| 255 |
| 33  |
| 92  |
| 8   |
| 24  |
| 41  |
| 31  |
| 27  |
| 1   |
| 5   |
| 27  |
| 104 |
| 691 |
| 165 |
| 23  |
| 15  |
| 77  |
| 29  |
| 68  |
| 2   |
| 23  |
| 53  |
| 34  |
| 32  |
| 11  |
| 60  |
| 15  |
| 11  |
| 11  |
| 18  |
| 25  |
| 29  |
| 2   |
| 21  |
| 24  |
| 51  |
| 73  |
| 1   |
| 8   |
| 13  |
| 265 |
| 23  |
| 4   |
| 2   |
| 169 |

|      |
|------|
| 30   |
| 5    |
| 2    |
| 27   |
| 47   |
| 9    |
| 1    |
| 73   |
| 22   |
| 80   |
| 1    |
| 4    |
| 65   |
| 14   |
| 1    |
| 4    |
| 24   |
| 45   |
| 72   |
| 2    |
| 13   |
| 18   |
| 15   |
| 28   |
| 12   |
| 18   |
| 40   |
| 22   |
| 9    |
| 31   |
| 17   |
| 1052 |
| 17   |
| 2    |
| 6    |
| 9    |
| 59   |
| 70   |
| 62   |
| 11   |
| 38   |
| 26   |
| 3    |
| 4    |
| 22   |
| 61   |
| 14   |
| 3    |
| 6    |
| 20   |



|     |
|-----|
| 63  |
| 23  |
| 7   |
| 29  |
| 44  |
| 34  |
| 2   |
| 7   |
| 53  |
| 5   |
| 14  |
| 43  |
| 49  |
| 36  |
| 5   |
| 26  |
| 41  |
| 1   |
| 18  |
| 24  |
| 25  |
| 1   |
| 33  |
| 148 |
| 27  |
| 5   |
| 8   |
| 14  |
| 6   |
| 74  |
| 35  |
| 3   |
| 10  |
| 89  |
| 33  |
| 50  |
| 3   |
| 40  |
| 25  |
| 89  |
| 18  |
| 9   |
| 12  |
| 35  |
| 65  |
| 2   |
| 8   |
| 45  |
| 45  |
| 18  |

|     |
|-----|
| 4   |
| 11  |
| 7   |
| 27  |
| 13  |
| 2   |
| 13  |
| 33  |
| 53  |
| 21  |
| 4   |
| 15  |
| 18  |
| 33  |
| 13  |
| 23  |
| 2   |
| 23  |
| 74  |
| 21  |
| 5   |
| 21  |
| 70  |
| 8   |
| 1   |
| 9   |
| 25  |
| 56  |
| 13  |
| 6   |
| 10  |
| 21  |
| 60  |
| 2   |
| 9   |
| 4   |
| 16  |
| 9   |
| 1   |
| 12  |
| 3   |
| 38  |
| 33  |
| 6   |
| 3   |
| 10  |
| 55  |
| 84  |
| 20  |
| 144 |

|     |
|-----|
| 16  |
| 57  |
| 26  |
| 4   |
| 4   |
| 412 |
| 56  |
| 4   |
| 25  |
| 23  |
| 47  |
| 12  |
| 2   |
| 4   |
| 6   |
| 15  |
| 2   |
| 4   |
| 1   |
| 6   |
| 38  |
| 8   |
| 1   |
| 15  |
| 41  |
| 23  |
| 8   |
| 10  |
| 6   |
| 52  |
| 25  |
| 3   |
| 3   |
| 31  |
| 4   |
| 10  |
| 35  |
| 13  |
| 4   |
| 10  |
| 14  |
| 46  |
| 15  |
| 4   |
| 4   |
| 12  |
| 45  |
| 15  |
| 7   |
| 26  |

|     |
|-----|
| 10  |
| 25  |
| 34  |
| 4   |
| 19  |
| 74  |
| 48  |
| 76  |
| 5   |
| 6   |
| 40  |
| 32  |
| 0   |
| 15  |
| 13  |
| 17  |
| 43  |
| 9   |
| 3   |
| 15  |
| 23  |
| 18  |
| 9   |
| 17  |
| 4   |
| 34  |
| 4   |
| 6   |
| 11  |
| 34  |
| 44  |
| 206 |
| 8   |
| 41  |
| 118 |
| 9   |
| 14  |
| 23  |
| 14  |
| 6   |
| 1   |
| 32  |
| 29  |
| 8   |
| 10  |
| 18  |
| 4   |
| 10  |
| 21  |
| 19  |

|     |
|-----|
| 8   |
| 18  |
| 15  |
| 12  |
| 37  |
| 11  |
| 36  |
| 14  |
| 55  |
| 29  |
| 181 |
| 5   |
| 29  |
| 52  |
| 4   |
| 4   |
| 7   |
| 38  |
| 301 |
| 5   |
| 3   |
| 34  |
| 15  |
| 57  |
| 35  |
| 10  |
| 9   |
| 20  |
| 12  |
| 9   |
| 20  |
| 40  |
| 23  |
| 3   |
| 17  |
| 11  |
| 33  |
| 2   |
| 8   |
| 18  |
| 14  |
| 20  |
| 268 |
| 21  |
| 160 |
| 29  |
| 8   |
| 25  |
| 611 |
| 19  |

|      |
|------|
| 89   |
| 9    |
| 10   |
| 223  |
| 44   |
| 16   |
| 19   |
| 14   |
| 28   |
| 40   |
| 28   |
| 8    |
| 6    |
| 20   |
| 85   |
| 12   |
| 4    |
| 18   |
| 6    |
| 48   |
| 23   |
| 94   |
| 16   |
| 73   |
| 82   |
| 3415 |
| 10   |
| 10   |
| 12   |
| 49   |
| 31   |
| 10   |
| 34   |
| 983  |
| 174  |
| 41   |
| 56   |
| 1146 |
| 7    |
| 191  |
| 28   |
| 10   |
| 21   |
| 10   |
| 26   |
| 5    |
| 34   |
| 95   |
| 21   |
| 5    |

|     |
|-----|
| 6   |
| 11  |
| 58  |
| 19  |
| 4   |
| 41  |
| 17  |
| 46  |
| 23  |
| 8   |
| 6   |
| 4   |
| 12  |
| 5   |
| 8   |
| 26  |
| 161 |
| 18  |
| 48  |
| 15  |
| 19  |
| 62  |
| 62  |
| 20  |
| 4   |
| 91  |
| 40  |
| 14  |
| 224 |
| 163 |
| 56  |
| 14  |
| 7   |
| 3   |
| 13  |
| 19  |
| 13  |
| 146 |
| 10  |
| 23  |
| 47  |
| 24  |
| 36  |
| 6   |
| 6   |
| 43  |
| 23  |
| 9   |
| 6   |
| 10  |

|        |
|--------|
| 39     |
| 18     |
| 1      |
| 13     |
| 17     |
| 50     |
| 12     |
| 46     |
| 10     |
| 14     |
| 41     |
| 176    |
| 7      |
| 21     |
| 92     |
| 35     |
| 175    |
| 11     |
| 13     |
| 20     |
| 48     |
| 19     |
| 17     |
| 17     |
| 13     |
| 61     |
| 362    |
| 362    |
| 5      |
| 18     |
| 32     |
| 18     |
| 22     |
| 32     |
| 21     |
| 8      |
| 3      |
| or the |
|        |
| +3rd Q |
| 250    |
| 864    |
| 645    |
| 453    |
| 74     |
| 60     |
| 77     |
| 34     |
| 82     |



|      |
|------|
| 201  |
| 119  |
| 68   |
| 50   |
| 34   |
| 42   |
| 120  |
| 1671 |
| 571  |
| 988  |
| 211  |
| 115  |
| 133  |
| 2636 |
| 95   |
| 96   |
| 43   |
| 46   |
| 2152 |
| 2817 |
| 4511 |
| 995  |
| 1286 |
| 1425 |
| 1918 |
| 1108 |
| 1098 |
| 2224 |
| 2119 |
| 624  |
| 1486 |
| 4179 |
| 31   |
| 17   |
| 62   |
| 380  |
| 643  |
| 922  |
| 1515 |
| 59   |
| 62   |
| 9    |
| 34   |
| 56   |
| 148  |
| 233  |
| 51   |
| 106  |
| 36   |
| 16   |

|      |
|------|
| 98   |
| 549  |
| 844  |
| 1037 |
| 80   |
| 15   |
| 21   |
| 71   |
| 25   |
| 57   |
| 117  |
| 193  |
| 36   |
| 36   |
| 6    |
| 74   |
| 855  |
| 885  |
| 913  |
| 47   |
| 160  |
| 24   |
| 178  |
| 84   |
| 70   |
| 13   |
| 73   |
| 28   |
| 113  |
| 1498 |
| 253  |
| 676  |
| 525  |
| 2164 |
| 207  |
| 518  |
| 41   |
| 123  |
| 132  |
| 118  |
| 27   |
| 164  |
| 21   |
| 128  |
| 91   |
| 116  |
| 89   |
| 129  |
| 52   |
| 103  |

|      |
|------|
| 42   |
| 67   |
| 18   |
| 1061 |
| 106  |
| 386  |
| 492  |
| 42   |
| 16   |
| 12   |
| 61   |
| 184  |
| 37   |
| 55   |
| 63   |
| 16   |
| 42   |
| 350  |
| 139  |
| 16   |
| 17   |
| 156  |
| 21   |
| 52   |
| 1268 |
| 63   |
| 38   |
| 60   |
| 398  |
| 94   |
| 118  |
| 27   |
| 130  |
| 125  |
| 224  |
| 824  |
| 96   |
| 85   |
| 258  |
| 21   |
| 294  |
| 17   |
| 1301 |
| 61   |
| 313  |
| 152  |
| 30   |
| 274  |
| 33   |
| 48   |

|      |
|------|
| 19   |
| 12   |
| 25   |
| 94   |
| 2    |
| 582  |
| 6898 |
| 58   |
| 58   |
| 42   |
| 9    |
| 70   |
| 37   |
| 251  |
| 247  |
| 24   |
| 39   |
| 1252 |
| 82   |
| 2012 |
| 6181 |
| 133  |
| 26   |
| 7    |
| 37   |
| 41   |
| 99   |
| 231  |
| 83   |
| 274  |
| 59   |
| 55   |
| 121  |
| 2350 |
| 1611 |
| 590  |
| 79   |
| 562  |
| 51   |
| 28   |
| 416  |
| 17   |
| 922  |
| 17   |
| 1022 |
| 114  |
| 1028 |
| 3638 |
| 84   |
| 142  |

|      |
|------|
| 70   |
| 644  |
| 539  |
| 33   |
| 98   |
| 60   |
| 79   |
| 29   |
| 108  |
| 34   |
| 72   |
| 53   |
| 142  |
| 3    |
| 24   |
| 32   |
| 76   |
| 405  |
| 477  |
| 198  |
| 189  |
| 39   |
| 21   |
| 60   |
| 40   |
| 21   |
| 235  |
| 183  |
| 24   |
| 42   |
| 33   |
| 49   |
| 485  |
| 554  |
| 282  |
| 232  |
| 258  |
| 66   |
| 21   |
| 87   |
| 58   |
| 37   |
| 13   |
| 102  |
| 473  |
| 99   |
| 0    |
| 1234 |
| 93   |
| 2    |

|      |
|------|
| 76   |
| 236  |
| 55   |
| 1256 |
| 92   |
| 56   |
| 7    |
| 88   |
| 90   |
| 19   |
| 311  |
| 177  |
| 968  |
| 1282 |
| 30   |
| 189  |
| 171  |
| 1496 |
| 1122 |
| 14   |
| 95   |
| 131  |
| 1136 |
| 748  |
| 95   |
| 229  |
| 105  |
| 67   |
| 155  |
| 64   |
| 97   |
| 137  |
| 18   |
| 37   |
| 16   |
| 23   |
| 21   |
| 16   |
| 72   |
| 55   |
| 50   |
| 24   |
| 63   |
| 22   |
| 44   |
| 663  |
| 77   |
| 128  |
| 76   |
| 142  |

|      |
|------|
| 64   |
| 27   |
| 51   |
| 105  |
| 16   |
| 34   |
| 29   |
| 63   |
| 120  |
| 188  |
| 39   |
| 113  |
| 119  |
| 19   |
| 31   |
| 75   |
| 40   |
| 18   |
| 14   |
| 352  |
| 284  |
| 375  |
| 112  |
| 12   |
| 44   |
| 24   |
| 119  |
| 11   |
| 11   |
| 387  |
| 7    |
| 24   |
| 925  |
| 554  |
| 866  |
| 1529 |
| 1864 |
| 653  |
| 864  |
| 1015 |
| 1701 |
| 791  |
| 696  |
| 143  |
| 1455 |
| 881  |
| 664  |
| 189  |
| 606  |
| 1179 |

|      |
|------|
| 586  |
| 367  |
| 328  |
| 45   |
| 1421 |
| 8    |
| 16   |
| 41   |
| 50   |
| 41   |
| 808  |
| 99   |
| 67   |
| 184  |
| 201  |
| 1278 |
| 2312 |
| 410  |
| 520  |
| 930  |
| 2677 |
| 404  |
| 334  |
| 946  |
| 440  |
| 603  |
| 316  |
| 820  |
| 3642 |
| 439  |
| 166  |
| 56   |
| 6    |
| 89   |
| 65   |
| 10   |
| 53   |
| 4101 |
| 152  |
| 106  |
| 51   |
| 23   |
| 31   |
| 49   |
| 28   |
| 6    |
| 11   |
| 14   |
| 80   |
| 19   |



|      |
|------|
| 750  |
| 1054 |
| 1016 |
| 4549 |
| 56   |
| 6    |
| 7    |
| 12   |
| 36   |
| 300  |
| 693  |
| 407  |
| 18   |
| 45   |
| 221  |
| 36   |
| 120  |
| 46   |
| 142  |
| 23   |
| 80   |
| 81   |
| 60   |
| 58   |
| 675  |
| 430  |
| 2508 |
| 16   |
| 33   |
| 91   |
| 67   |
| 97   |
| 65   |
| 65   |
| 53   |
| 44   |
| 200  |
| 813  |
| 528  |
| 2442 |
| 24   |
| 853  |
| 39   |
| 127  |
| 472  |
| 96   |
| 127  |
| 52   |
| 66   |
| 43   |

|      |
|------|
| 38   |
| 28   |
| 1945 |
| 502  |
| 648  |
| 3271 |
| 158  |
| 86   |
| 93   |
| 33   |
| 34   |
| 28   |
| 118  |
| 150  |
| 62   |
| 74   |
| 64   |
| 66   |
| 322  |
| 508  |
| 306  |
| 71   |
| 1623 |
| 352  |
| 5036 |
| 1419 |
| 261  |
| 3358 |
