# Supplementary material for: Repertoire of Abs primed by bacteria in gnotobiotic mice
Source: PubMed Central journal article supplement — Innate Immun. 2018 Mar 16;24(3):180–7. doi: 10.1177/1753425918763524 (PMC6852387; doi:10.1177/1753425918763524), 2018-03-16
Supplement: Supplementary_table4.pdf [file Supplementary_table4.pdf]

**Supplementary Table 4** represents only positive signals marked in red colour (higher than 1500 RFU; in a range of 0-65535 RFU, RFU - relative fluorescent units) in 9 groups of animals used in this work. Median - is median of 6-8 replicates of particular glycan; Q1 and Q3 - 25% and 75% quartiles as a measure of deviation; measure of "positivity" is a signal that is 5 times greater than the background value, which was not higher than 300 RFU. Measurement of 5-time greater background values is our conventional practice.

| Group of animals | sterile conditions were kept |        |        |        |        |        |        |        |        |        |        |        |
|------------------|------------------------------|--------|--------|--------|--------|--------|--------|--------|--------|--------|--------|--------|
| Mouse ID         | 1.1                          |        |        | 1.2    |        |        | 1.3    |        |        | 1.4    |        |        |
| Nr               | Median                       | -1st Q | +3rd Q | Median | -1st Q | +3rd Q | Median | -1st Q | +3rd Q | Median | -1st Q | +3rd Q |
| 020              | 6                            | 4      | 3      | 1519   | 122    | 107    | 12     | 9      | 6      | 5      | 3      | 8      |
| 372              | 53                           | 36     | 25     | 18191  | 6621   | 2619   | 27     | 25     | 51     | 17     | 12     | 45     |
| 497              | 51                           | 18     | 38     | 4202   | 1175   | 2999   | 40     | 6      | 57     | 9      | 5      | 21     |
| 1220             | 69                           | 51     | 7      | 3228   | 1070   | 336    | 223    | 148    | 133    | 18     | 13     | 22     |

| Group of animals | contact to <i>Escherichia coli</i> strain W3110 |  |  |     |  |  |     |  |  |     |  |  |
|------------------|-------------------------------------------------|--|--|-----|--|--|-----|--|--|-----|--|--|
| Mouse ID         | 2.1                                             |  |  | 2.2 |  |  | 2.3 |  |  | 2.4 |  |  |
|                  | no positive signals were observed               |  |  |     |  |  |     |  |  |     |  |  |

| Group of animals | contact to <i>Bifidobacterium longum</i> strain NCC2705 |        |        |        |        |        |        |        |        |        |        |        |
|------------------|---------------------------------------------------------|--------|--------|--------|--------|--------|--------|--------|--------|--------|--------|--------|
| Mouse ID         | 3.1                                                     |        |        | 3.2    |        |        | 3.3    |        |        | 3.4    |        |        |
| Nr               | Median                                                  | -1st Q | +3rd Q | Median | -1st Q | +3rd Q | Median | -1st Q | +3rd Q | Median | -1st Q | +3rd Q |
| 166              | 26                                                      | 10     | 12     | 14     | 7      | 3      | 47127  | 608    | 1723   | 19     | 4      | 5      |
| 362              | 45                                                      | 25     | 79     | 28     | 8      | 26     | 4302   | 475    | 181    | 321    | 22     | 16     |
| 363              | 73                                                      | 25     | 23     | 44     | 6      | 12     | 4634   | 480    | 372    | 28     | 13     | 19     |
| 392              | 165                                                     | 26     | 35     | 74     | 12     | 5      | 7040   | 108    | 457    | 841    | 76     | 105    |
| 437              | 348                                                     | 18     | 24     | 228    | 7      | 8      | 7644   | 437    | 367    | 604    | 19     | 49     |
| 1208             | 4764                                                    | 308    | 732    | 192    | 2      | 11     | 445    | 85     | 43     | 45     | 6      | 12     |
| 1220             | 572                                                     | 68     | 71     | 108    | 10     | 4      | 7684   | 2033   | 405    | 3959   | 818    | 640    |
| 1222             | 42                                                      | 10     | 16     | 22     | 9      | 49     | 3412   | 972    | 357    | 441    | 123    | 95     |
| 2101             | 55                                                      | 11     | 4      | 27     | 7      | 2      | 3250   | 690    | 559    | 157    | 34     | 44     |

| Group of animals | contact to <i>Bacteroides thetaiotaomicron</i> strain VPI-5482 (ATCC 29148) |        |        |        |        |        |        |        |        |        |        |        |
|------------------|-----------------------------------------------------------------------------|--------|--------|--------|--------|--------|--------|--------|--------|--------|--------|--------|
| Mouse ID         | 4.1                                                                         |        |        | 4.2    |        |        | 4.3    |        |        | 4.4    |        |        |
| Nr               | Median                                                                      | -1st Q | +3rd Q | Median | -1st Q | +3rd Q | Median | -1st Q | +3rd Q | Median | -1st Q | +3rd Q |
| 106              | 30                                                                          | 15     | 22     | 2552   | 537    | 1582   | 8      | 4      | 3      | 16     | 12     | 11     |
| 107              | 35                                                                          | 6      | 4      | 2269   | 191    | 543    | 2      | 1      | 2      | 2      | 1      | 0      |
| 192              | 239                                                                         | 32     | 37     | 54067  | 14779  | 10022  | 16     | 7      | 3      | 119    | 113    | 37     |
| 193              | 827                                                                         | 216    | 151    | 6714   | 3380   | 3751   | 14     | 4      | 3      | 414    | 303    | 107    |
| 194              | 20                                                                          | 12     | 32     | 6295   | 1340   | 443    | 2      | 1      | 1      | 1      | 0      | 3      |
| 197              | 20973                                                                       | 2802   | 2972   | 43229  | 12037  | 18330  | 26     | 10     | 12     | 1828   | 554    | 415    |
| 202              | 2187                                                                        | 582    | 322    | 62358  | 9558   | 3177   | 29     | 5      | 4      | 653    | 364    | 186    |
| 256              | 9335                                                                        | 8113   | 6701   | 182    | 131    | 102    | 12     | 9      | 9      | 1459   | 1415   | 1896   |

|      |       |      |      |       |       |      |       |      |      |     |     |     |
|------|-------|------|------|-------|-------|------|-------|------|------|-----|-----|-----|
| 268  | 17450 | 8789 | 3574 | 12    | 5     | 9    | 11    | 6    | 4    | 12  | 6   | 11  |
| 503  | 1893  | 1536 | 932  | 4     | 2     | 4    | 6     | 4    | 7    | 207 | 130 | 314 |
| 1220 | 1540  | 210  | 150  | 1498  | 484   | 373  | 9     | 4    | 3    | 372 | 363 | 366 |
| 1610 | 61536 | 4776 | 2972 | 49251 | 14108 | 7835 | 10575 | 2662 | 1307 | 71  | 56  | 85  |

| Group of animals | contact to <i>Lactobacillus reuteri</i> strain SD2112 (ATCC 55730) |        |        |        |        |        |        |        |        |        |        |        |
|------------------|--------------------------------------------------------------------|--------|--------|--------|--------|--------|--------|--------|--------|--------|--------|--------|
| Mouse ID         | 5.1                                                                |        |        | 5.2    |        |        | 5.3    |        |        | 5.4    |        |        |
| Nr               | Median                                                             | -1st Q | +3rd Q | Median | -1st Q | +3rd Q | Median | -1st Q | +3rd Q | Median | -1st Q | +3rd Q |
| 020              | 23                                                                 | 9      | 4      | 20     | 12     | 40     | 3343   | 1086   | 354    | 7      | 2      | 22     |
| 181              | 491                                                                | 60     | 438    | 2659   | 763    | 709    | 1578   | 462    | 421    | 10965  | 4092   | 285    |
| 256              | 24                                                                 | 13     | 9      | 55     | 24     | 25     | 29     | 11     | 10     | 3213   | 550    | 386    |
| 392              | 197                                                                | 87     | 160    | 986    | 204    | 174    | 548    | 106    | 28     | 3327   | 284    | 174    |
| 396              | 104                                                                | 9      | 7      | 87     | 4      | 11     | 70     | 32     | 40     | 3075   | 486    | 660    |
| 437              | 376                                                                | 10     | 13     | 748    | 68     | 22     | 450    | 62     | 140    | 2424   | 474    | 579    |
| 1220             | 465                                                                | 145    | 180    | 2940   | 233    | 103    | 1922   | 140    | 365    | 8180   | 602    | 743    |
| 1222             | 126                                                                | 20     | 76     | 88     | 9      | 7      | 9067   | 1495   | 2362   | 187    | 61     | 51     |
| 1609             | 732                                                                | 470    | 6779   | 1855   | 815    | 593    | 86     | 40     | 13     | 110    | 55     | 32     |
| 1610             | 1418                                                               | 89     | 260    | 1852   | 494    | 202    | 145    | 53     | 33     | 99     | 48     | 29     |
| 2101             | 181                                                                | 33     | 48     | 98     | 45     | 28     | 6139   | 1131   | 738    | 155    | 34     | 31     |

| Group of animals | contact to 4 strains of bacteria ( <i>E. coli</i> strain W3110, <i>B. longum</i> strain NCC2705, <i>B. thetaiotaomicron</i> strain VPI-5482, <i>L. reuteri</i> strain SD2112) |        |        |        |        |        |        |        |        |        |        |        |
|------------------|-------------------------------------------------------------------------------------------------------------------------------------------------------------------------------|--------|--------|--------|--------|--------|--------|--------|--------|--------|--------|--------|
| Mouse ID         | 6.1                                                                                                                                                                           |        |        | 6.2    |        |        | 6.3    |        |        | 6.4    |        |        |
| Nr               | Median                                                                                                                                                                        | -1st Q | +3rd Q | Median | -1st Q | +3rd Q | Median | -1st Q | +3rd Q | Median | -1st Q | +3rd Q |
| 006              | 2480                                                                                                                                                                          | 1420   | 869    | 57966  | 22562  | 3474   | 18970  | 7518   | 2073   | 71     | 26     | 111    |
| 020              | 5309                                                                                                                                                                          | 942    | 1388   | 92     | 71     | 48     | 160    | 75     | 92     | 1513   | 143    | 604    |
| 025              | 584                                                                                                                                                                           | 101    | 233    | 22245  | 11796  | 24971  | 5406   | 1231   | 1687   | 17     | 4      | 3      |
| 131              | 2220                                                                                                                                                                          | 107    | 1060   | 1057   | 43     | 148    | 483    | 58     | 93     | 3829   | 555    | 1127   |
| 166              | 48                                                                                                                                                                            | 9      | 36     | 860    | 476    | 177    | 2579   | 131    | 199    | 47     | 10     | 19     |
| 263              | 7006                                                                                                                                                                          | 2901   | 1026   | 65535  | 16382  | 0      | 64719  | 3640   | 768    | 27     | 11     | 13     |
| 368              | 31                                                                                                                                                                            | 16     | 10     | 1980   | 289    | 1376   | 1196   | 721    | 670    | 85     | 35     | 13     |
| 369              | 43                                                                                                                                                                            | 13     | 10     | 2903   | 274    | 142    | 1617   | 672    | 921    | 58     | 12     | 17     |
| 392              | 618                                                                                                                                                                           | 156    | 133    | 2015   | 200    | 355    | 2073   | 255    | 435    | 2536   | 36     | 138    |
| 1220             | 1056                                                                                                                                                                          | 566    | 601    | 5399   | 728    | 951    | 6354   | 1801   | 388    | 4955   | 1388   | 399    |
| 1222             | 900                                                                                                                                                                           | 303    | 148    | 92     | 12     | 13     | 1398   | 520    | 95     | 2435   | 708    | 284    |
| 1606             | 3020                                                                                                                                                                          | 1790   | 2366   | 56     | 19     | 45     | 8      | 2      | 6      | 44     | 8      | 25     |
| 2105             | 2284                                                                                                                                                                          | 861    | 147    | 925    | 60     | 32     | 514    | 202    | 78     | 160    | 63     | 40     |

| Group of animals | transfer to normal diet (standard granulated food) |        |        |        |        |        |        |        |        |        |        |        |
|------------------|----------------------------------------------------|--------|--------|--------|--------|--------|--------|--------|--------|--------|--------|--------|
| Mouse ID         | 7.1                                                |        |        | 7.2    |        |        | 7.3    |        |        | 7.4    |        |        |
| Nr               | Median                                             | -1st Q | +3rd Q | Median | -1st Q | +3rd Q | Median | -1st Q | +3rd Q | Median | -1st Q | +3rd Q |
| 181              | 643                                                | 176    | 167    | 590    | 88     | 48     | 364    | 131    | 75     | 2702   | 920    | 251    |
| 193              | 52                                                 | 3      | 11     | 34     | 2      | 12     | 249    | 165    | 192    | 3869   | 1915   | 93     |
| 197              | 615                                                | 108    | 37     | 30     | 6      | 13     | 1957   | 1069   | 668    | 6190   | 2013   | 971    |
| 1208             | 103                                                | 10     | 6      | 5342   | 796    | 229    | 2      | 1      | 3      | 51     | 20     | 24     |
| 1220             | 255                                                | 25     | 14     | 541    | 63     | 99     | 1492   | 435    | 100    | 1795   | 510    | 380    |

|      |    |    |    |     |     |     |    |   |   |       |      |     |
|------|----|----|----|-----|-----|-----|----|---|---|-------|------|-----|
| 1416 | 52 | 12 | 47 | 785 | 125 | 203 | 16 | 3 | 5 | 14787 | 2421 | 437 |
|------|----|----|----|-----|-----|-----|----|---|---|-------|------|-----|

| Group of animals | gavage orally of a sample of non-sterile mice feces |        |        |        |        |        |        |        |        |        |        |        |
|------------------|-----------------------------------------------------|--------|--------|--------|--------|--------|--------|--------|--------|--------|--------|--------|
| Mouse ID         | 8.1                                                 |        |        | 8.2    |        |        | 8.3    |        |        | 8.4    |        |        |
| Nr               | Median                                              | -1st Q | +3rd Q | Median | -1st Q | +3rd Q | Median | -1st Q | +3rd Q | Median | -1st Q | +3rd Q |
| 011              | 164                                                 | 98     | 21     | 2151   | 148    | 611    | 70     | 16     | 22     | 71     | 32     | 24     |
| 013              | 334                                                 | 96     | 76     | 3716   | 472    | 237    | 448    | 217    | 44     | 193    | 55     | 31     |
| 019              | 125                                                 | 40     | 15     | 467    | 61     | 38     | 54     | 16     | 9      | 6728   | 258    | 691    |
| 020              | 311                                                 | 188    | 1153   | 14971  | 3225   | 1827   | 898    | 473    | 1262   | 305    | 291    | 165    |
| 026              | 62                                                  | 24     | 23     | 155    | 97     | 9      | 7185   | 1389   | 2493   | 11     | 1      | 2      |
| 074              | 5385                                                | 540    | 422    | 115    | 21     | 95     | 73     | 19     | 23     | 26     | 11     | 13     |
| 075              | 55                                                  | 14     | 31     | 698    | 57     | 107    | 43     | 10     | 31     | 3794   | 252    | 265    |
| 080              | 4393                                                | 423    | 475    | 169    | 20     | 82     | 49     | 12     | 8      | 398    | 61     | 169    |
| 115              | 34                                                  | 12     | 14     | 2277   | 2021   | 241    | 241    | 98     | 32     | 118    | 42     | 31     |
| 117              | 105                                                 | 14     | 30     | 6130   | 1049   | 1012   | 5797   | 443    | 375    | 3652   | 402    | 1052   |
| 123              | 59                                                  | 11     | 11     | 85     | 36     | 14     | 27     | 4      | 4      | 2804   | 179    | 70     |
| 139              | 21                                                  | 17     | 20     | 3405   | 3361   | 7712   | 871    | 675    | 430    | 4      | 1      | 7      |
| 153              | 135                                                 | 33     | 20     | 2654   | 42     | 417    | 56     | 14     | 18     | 88     | 20     | 36     |
| 162              | 164                                                 | 70     | 70     | 21553  | 3738   | 5660   | 45     | 17     | 50     | 108    | 55     | 25     |
| 166              | 52                                                  | 11     | 23     | 120    | 29     | 13     | 30957  | 2878   | 5264   | 370    | 106    | 148    |
| 178              | 93                                                  | 22     | 34     | 1950   | 187    | 455    | 68     | 26     | 75     | 127    | 68     | 33     |
| 179              | 106                                                 | 17     | 32     | 2005   | 673    | 657    | 61     | 17     | 26     | 102    | 7      | 50     |
| 180              | 14                                                  | 8      | 26     | 1610   | 1584   | 1859   | 23     | 7      | 4      | 7      | 3      | 3      |
| 195              | 17                                                  | 14     | 19     | 1632   | 1248   | 947    | 13     | 3      | 5      | 5      | 1      | 4      |
| 256              | 263                                                 | 136    | 64     | 8710   | 412    | 226    | 241    | 30     | 34     | 355    | 52     | 144    |
| 263              | 1274                                                | 675    | 237    | 203    | 101    | 42     | 108    | 28     | 9      | 4179   | 2042   | 412    |
| 362              | 10913                                               | 3757   | 676    | 18898  | 1483   | 1615   | 1067   | 60     | 97     | 597    | 37     | 74     |
| 364              | 1619                                                | 59     | 182    | 1506   | 30     | 69     | 1376   | 117    | 30     | 1353   | 47     | 76     |
| 392              | 11521                                               | 1278   | 3651   | 11578  | 426    | 2815   | 1220   | 136    | 80     | 932    | 93     | 206    |
| 396              | 486                                                 | 26     | 16     | 5840   | 480    | 1894   | 334    | 9      | 45     | 1085   | 28     | 118    |
| 437              | 9523                                                | 438    | 1327   | 8155   | 224    | 1434   | 1516   | 65     | 107    | 717    | 91     | 37     |
| 503              | 195                                                 | 27     | 42     | 3400   | 979    | 398    | 1745   | 521    | 113    | 1842   | 470    | 301    |
| 1002             | 141                                                 | 14     | 11     | 169    | 88     | 72     | 120    | 12     | 38     | 1597   | 226    | 268    |
| 1004             | 4320                                                | 1141   | 803    | 6545   | 781    | 1488   | 888    | 113    | 106    | 1234   | 262    | 160    |
| 1008             | 7746                                                | 505    | 271    | 26749  | 1345   | 1112   | 360    | 27     | 27     | 2549   | 67     | 611    |
| 1009             | 1708                                                | 473    | 100    | 1031   | 283    | 268    | 68     | 4      | 6      | 267    | 32     | 19     |
| 1010             | 488                                                 | 41     | 15     | 2168   | 239    | 197    | 3500   | 189    | 447    | 599    | 16     | 89     |
| 1013             | 163                                                 | 8      | 27     | 303    | 62     | 33     | 92     | 25     | 15     | 7621   | 2005   | 223    |
| 1208             | 35927                                               | 437    | 1202   | 43580  | 1692   | 1125   | 13738  | 684    | 445    | 44000  | 3514   | 3415   |
| 1216             | 69                                                  | 17     | 21     | 117    | 24     | 41     | 61     | 13     | 16     | 32204  | 2075   | 983    |
| 1217             | 1662                                                | 381    | 214    | 1005   | 175    | 118    | 988    | 122    | 14     | 728    | 35     | 174    |
| 1220             | 29080                                               | 2987   | 1849   | 35445  | 3838   | 2082   | 5218   | 951    | 568    | 5614   | 1325   | 1146   |
| 1222             | 1034                                                | 261    | 239    | 9367   | 1303   | 3298   | 10571  | 2964   | 2139   | 1715   | 513    | 191    |
| 1232             | 1688                                                | 310    | 210    | 175    | 37     | 36     | 11486  | 5009   | 1738   | 50     | 29     | 34     |
| 1233             | 226                                                 | 74     | 19     | 6013   | 1009   | 223    | 6160   | 128    | 327    | 500    | 60     | 95     |
| 1407             | 35                                                  | 7      | 8      | 2313   | 340    | 58     | 44     | 7      | 24     | 19     | 6      | 8      |
| 1416             | 228                                                 | 21     | 20     | 10464  | 1609   | 1088   | 84     | 16     | 18     | 392    | 21     | 26     |
| 1418             | 107                                                 | 20     | 30     | 174    | 14     | 3      | 1831   | 117    | 77     | 8907   | 237    | 161    |

|      |      |      |      |       |      |      |      |      |     |      |     |     |
|------|------|------|------|-------|------|------|------|------|-----|------|-----|-----|
| 1603 | 607  | 132  | 38   | 3931  | 332  | 170  | 127  | 29   | 18  | 76   | 29  | 19  |
| 1606 | 1299 | 979  | 385  | 1508  | 602  | 87   | 155  | 62   | 20  | 669  | 146 | 62  |
| 1610 | 1263 | 226  | 232  | 18771 | 2269 | 5012 | 508  | 144  | 76  | 494  | 209 | 40  |
| 1613 | 720  | 9    | 47   | 1350  | 143  | 73   | 400  | 11   | 24  | 3059 | 357 | 224 |
| 1614 | 727  | 13   | 18   | 225   | 40   | 119  | 187  | 21   | 52  | 1666 | 239 | 163 |
| 2006 | 316  | 48   | 22   | 13669 | 979  | 900  | 143  | 54   | 10  | 81   | 24  | 13  |
| 2007 | 99   | 11   | 12   | 9624  | 539  | 979  | 408  | 127  | 36  | 68   | 54  | 17  |
| 2101 | 2355 | 1998 | 831  | 9527  | 752  | 253  | 6119 | 1393 | 620 | 892  | 110 | 176 |
| 2105 | 1056 | 113  | 249  | 1610  | 127  | 108  | 266  | 66   | 15  | 269  | 90  | 35  |
| 2209 | 7485 | 3090 | 197  | 474   | 378  | 105  | 109  | 3    | 10  | 2219 | 83  | 362 |
| 2210 | 8763 | 1722 | 1183 | 874   | 100  | 288  | 79   | 3    | 1   | 1123 | 298 | 362 |

| Group of animals | conventional controls, CD1 male mice fed with standard granulated food |        |        |        |        |        |        |        |        |        |        |        |
|------------------|------------------------------------------------------------------------|--------|--------|--------|--------|--------|--------|--------|--------|--------|--------|--------|
| Mouse ID         | 9.1                                                                    |        |        | 9.2    |        |        | 9.3    |        |        | 9.4    |        |        |
| Nr               | Median                                                                 | -1st Q | +3rd Q | Median | -1st Q | +3rd Q | Median | -1st Q | +3rd Q | Median | -1st Q | +3rd Q |
| 001              | 238                                                                    | 55     | 76     | 5294   | 3953   | 931    | 400    | 223    | 250    | 1946   | 1117   | 250    |
| 017              | 400                                                                    | 119    | 38     | 186    | 65     | 69     | 286    | 44     | 30     | 2052   | 1367   | 120    |
| 019              | 252                                                                    | 138    | 134    | 422    | 168    | 276    | 946    | 512    | 228    | 1737   | 1025   | 571    |
| 020              | 1709                                                                   | 805    | 268    | 469    | 183    | 176    | 1231   | 419    | 294    | 1450   | 604    | 988    |
| 024              | 206                                                                    | 88     | 161    | 242    | 49     | 20     | 246    | 74     | 221    | 3322   | 1748   | 2636   |
| 038              | 322                                                                    | 24     | 25     | 698    | 530    | 535    | 370    | 109    | 855    | 2070   | 1412   | 2152   |
| 055              | 6034                                                                   | 2106   | 2880   | 5556   | 154    | 112    | 2641   | 335    | 703    | 4670   | 1114   | 4179   |
| 073              | 492                                                                    | 87     | 68     | 1975   | 105    | 115    | 158    | 1      | 7      | 540    | 219    | 62     |
| 094              | 166                                                                    | 57     | 36     | 496    | 374    | 1526   | 765    | 183    | 111    | 2888   | 1686   | 844    |
| 096              | 100                                                                    | 17     | 80     | 226    | 88     | 164    | 1618   | 1228   | 2094   | 3837   | 2276   | 1037   |
| 113              | 2202                                                                   | 396    | 358    | 80     | 13     | 10     | 628    | 322    | 696    | 520    | 364    | 913    |
| 115              | 281                                                                    | 123    | 112    | 2516   | 809    | 660    | 183    | 37     | 48     | 894    | 362    | 160    |
| 117              | 634                                                                    | 120    | 95     | 3704   | 723    | 812    | 166    | 58     | 59     | 1828   | 648    | 178    |
| 125              | 1680                                                                   | 362    | 348    | 15998  | 3283   | 2691   | 10880  | 4540   | 1948   | 7666   | 4597   | 1498   |
| 128              | 1144                                                                   | 61     | 106    | 2034   | 380    | 324    | 2027   | 131    | 927    | 1253   | 532    | 525    |
| 129              | 142                                                                    | 27     | 262    | 380    | 249    | 287    | 1316   | 518    | 270    | 2034   | 1412   | 2164   |
| 130              | 169                                                                    | 51     | 18     | 1950   | 343    | 318    | 322    | 40     | 108    | 599    | 110    | 207    |
| 131              | 570                                                                    | 93     | 126    | 3874   | 716    | 1152   | 1534   | 472    | 305    | 3060   | 846    | 518    |
| 154              | 923                                                                    | 11     | 211    | 510    | 148    | 308    | 1820   | 647    | 666    | 2250   | 177    | 386    |
| 168              | 4798                                                                   | 1830   | 776    | 255    | 37     | 44     | 170    | 10     | 6      | 194    | 28     | 42     |
| 169              | 641                                                                    | 158    | 100    | 931    | 99     | 21     | 1778   | 224    | 1021   | 1648   | 284    | 350    |
| 176              | 1278                                                                   | 194    | 700    | 418    | 48     | 90     | 3139   | 2381   | 1031   | 380    | 16     | 52     |
| 177              | 750                                                                    | 62     | 240    | 540    | 90     | 156    | 6980   | 695    | 843    | 4450   | 1321   | 1268   |
| 181              | 539                                                                    | 154    | 186    | 928    | 87     | 88     | 936    | 216    | 309    | 3673   | 1709   | 398    |
| 189              | 336                                                                    | 51     | 93     | 544    | 41     | 72     | 352    | 105    | 114    | 2857   | 357    | 824    |
| 192              | 157                                                                    | 20     | 29     | 1634   | 85     | 544    | 162    | 42     | 130    | 452    | 89     | 258    |
| 193              | 204                                                                    | 56     | 110    | 4937   | 220    | 304    | 109    | 11     | 37     | 166    | 32     | 21     |
| 198              | 252                                                                    | 78     | 529    | 341    | 50     | 91     | 154    | 44     | 22     | 1810   | 555    | 313    |
| 216              | 1356                                                                   | 210    | 138    | 1223   | 44     | 0      | 2160   | 1706   | 2164   | 363    | 197    | 582    |
| 217              | 5467                                                                   | 732    | 415    | 33880  | 1415   | 1386   | 5990   | 2258   | 626    | 43266  | 16936  | 6898   |
| 227              | 858                                                                    | 86     | 110    | 468    | 42     | 55     | 118    | 19     | 90     | 1721   | 231    | 247    |
| 233              | 265                                                                    | 170    | 448    | 408    | 141    | 66     | 144    | 28     | 20     | 3566   | 2763   | 2012   |
| 234              | 2506                                                                   | 1152   | 483    | 356    | 113    | 67     | 683    | 177    | 210    | 15906  | 5631   | 6181   |

|      |       |      |      |       |       |       |       |      |      |       |       |      |
|------|-------|------|------|-------|-------|-------|-------|------|------|-------|-------|------|
| 240  | 367   | 88   | 203  | 1758  | 272   | 89    | 239   | 51   | 132  | 382   | 66    | 41   |
| 245  | 1201  | 344  | 184  | 8411  | 449   | 795   | 1190  | 703  | 383  | 2358  | 300   | 274  |
| 249  | 1849  | 192  | 391  | 255   | 98    | 121   | 7630  | 6280 | 5831 | 22325 | 1619  | 2350 |
| 250  | 1800  | 250  | 210  | 287   | 137   | 65    | 11943 | 3947 | 595  | 18576 | 4601  | 1611 |
| 251  | 2704  | 382  | 332  | 86    | 7     | 17    | 122   | 28   | 57   | 280   | 164   | 590  |
| 253  | 284   | 72   | 313  | 3491  | 199   | 240   | 1338  | 1010 | 535  | 1690  | 281   | 562  |
| 255  | 2258  | 168  | 80   | 156   | 51    | 78    | 163   | 47   | 48   | 268   | 40    | 28   |
| 256  | 328   | 98   | 62   | 616   | 80    | 42    | 130   | 56   | 146  | 6086  | 593   | 416  |
| 259  | 176   | 19   | 5    | 426   | 24    | 67    | 673   | 132  | 156  | 3393  | 1289  | 922  |
| 260  | 2753  | 145  | 176  | 287   | 80    | 17    | 214   | 35   | 130  | 328   | 58    | 17   |
| 261  | 262   | 102  | 72   | 517   | 43    | 43    | 2622  | 759  | 204  | 8050  | 2618  | 1022 |
| 264  | 149   | 79   | 121  | 52434 | 21924 | 13101 | 7086  | 1912 | 1432 | 30150 | 8032  | 3638 |
| 300  | 122   | 13   | 21   | 2140  | 100   | 129   | 105   | 21   | 25   | 112   | 12    | 24   |
| 304  | 116   | 40   | 186  | 2116  | 404   | 92    | 176   | 9    | 216  | 211   | 62    | 405  |
| 306  | 146   | 61   | 128  | 1816  | 626   | 364   | 227   | 59   | 30   | 357   | 159   | 198  |
| 319  | 774   | 185  | 35   | 609   | 71    | 71    | 2852  | 954  | 594  | 800   | 214   | 235  |
| 320  | 1122  | 284  | 200  | 2024  | 139   | 128   | 4614  | 2120 | 590  | 1120  | 164   | 183  |
| 329  | 1537  | 330  | 348  | 1442  | 128   | 139   | 1845  | 1464 | 972  | 1118  | 344   | 258  |
| 362  | 11714 | 777  | 2376 | 5568  | 275   | 147   | 1332  | 767  | 803  | 65535 | 7525  | 0    |
| 363  | 3880  | 1257 | 1426 | 344   | 72    | 487   | 529   | 46   | 80   | 9494  | 5013  | 1234 |
| 364  | 1872  | 72   | 75   | 1699  | 159   | 35    | 1384  | 175  | 41   | 1131  | 191   | 93   |
| 368  | 116   | 16   | 15   | 8434  | 344   | 316   | 3285  | 469  | 664  | 383   | 214   | 236  |
| 372  | 2909  | 249  | 666  | 142   | 33    | 67    | 122   | 8    | 35   | 70    | 6     | 92   |
| 380  | 670   | 308  | 228  | 5963  | 738   | 1325  | 1558  | 361  | 585  | 2816  | 1776  | 968  |
| 381  | 147   | 48   | 24   | 3953  | 969   | 544   | 2699  | 1376 | 665  | 2664  | 887   | 1282 |
| 386  | 8888  | 228  | 219  | 16605 | 1277  | 163   | 7840  | 2364 | 1749 | 10940 | 3376  | 1496 |
| 387  | 309   | 27   | 274  | 3992  | 342   | 560   | 1580  | 1136 | 939  | 2238  | 1617  | 1122 |
| 390  | 280   | 48   | 179  | 218   | 80    | 34    | 558   | 309  | 80   | 1797  | 178   | 131  |
| 392  | 8618  | 1891 | 1804 | 10288 | 447   | 254   | 3424  | 2463 | 1403 | 7320  | 720   | 1136 |
| 396  | 608   | 232  | 178  | 816   | 78    | 76    | 136   | 21   | 68   | 1820  | 191   | 229  |
| 399  | 110   | 33   | 206  | 1727  | 414   | 185   | 418   | 231  | 220  | 287   | 144   | 155  |
| 437  | 5980  | 418  | 161  | 6145  | 384   | 339   | 1592  | 1187 | 1050 | 6085  | 219   | 663  |
| 480  | 1899  | 353  | 47   | 2184  | 178   | 127   | 2307  | 419  | 392  | 1194  | 312   | 128  |
| 497  | 2973  | 1229 | 93   | 527   | 75    | 47    | 452   | 49   | 60   | 494   | 33    | 16   |
| 1004 | 2698  | 408  | 39   | 23668 | 2844  | 4856  | 2954  | 304  | 694  | 12210 | 1586  | 1529 |
| 1016 | 142   | 10   | 27   | 2110  | 169   | 652   | 310   | 94   | 439  | 218   | 163   | 189  |
| 1017 | 307   | 164  | 189  | 364   | 164   | 94    | 366   | 175  | 71   | 1592  | 1015  | 606  |
| 1023 | 184   | 31   | 31   | 3986  | 562   | 309   | 876   | 386  | 192  | 5944  | 3514  | 1421 |
| 1202 | 452   | 98   | 32   | 696   | 63    | 97    | 505   | 180  | 38   | 1516  | 566   | 808  |
| 1206 | 178   | 68   | 125  | 280   | 176   | 196   | 242   | 48   | 163  | 1880  | 1208  | 201  |
| 1208 | 63706 | 9186 | 1829 | 4290  | 374   | 300   | 5002  | 315  | 1406 | 24601 | 9179  | 2312 |
| 1210 | 132   | 39   | 220  | 268   | 142   | 348   | 320   | 72   | 161  | 1774  | 1168  | 520  |
| 1212 | 244   | 18   | 68   | 272   | 128   | 101   | 388   | 69   | 415  | 1854  | 1062  | 2677 |
| 1214 | 150   | 36   | 160  | 296   | 137   | 174   | 304   | 136  | 368  | 1867  | 1208  | 334  |
| 1218 | 270   | 93   | 169  | 342   | 70    | 165   | 390   | 95   | 659  | 2083  | 1235  | 316  |
| 1220 | 7418  | 2407 | 1397 | 16690 | 2861  | 4078  | 5641  | 1241 | 2043 | 26970 | 11004 | 3642 |
| 1222 | 1960  | 690  | 626  | 862   | 26    | 43    | 2608  | 1868 | 333  | 938   | 66    | 166  |
| 1232 | 176   | 36   | 59   | 65535 | 4198  | 0     | 7811  | 5839 | 910  | 34943 | 26848 | 4101 |
| 1408 | 86    | 14   | 413  | 326   | 83    | 683   | 472   | 171  | 1477 | 2212  | 866   | 1054 |
| 1410 | 420   | 282  | 250  | 834   | 281   | 172   | 528   | 335  | 634  | 1727  | 1122  | 4549 |

|      |       |      |      |      |     |     |      |      |      |      |      |      |
|------|-------|------|------|------|-----|-----|------|------|------|------|------|------|
| 1606 | 182   | 105  | 141  | 354  | 24  | 124 | 1587 | 233  | 327  | 412  | 258  | 45   |
| 1610 | 7958  | 1900 | 552  | 1926 | 72  | 116 | 740  | 167  | 172  | 314  | 110  | 46   |
| 2003 | 272   | 93   | 75   | 1612 | 241 | 255 | 902  | 182  | 222  | 2715 | 1342 | 853  |
| 2004 | 287   | 147  | 52   | 2101 | 253 | 260 | 169  | 20   | 61   | 183  | 60   | 39   |
| 2006 | 616   | 216  | 475  | 2910 | 479 | 850 | 2812 | 1997 | 584  | 1090 | 248  | 472  |
| 2101 | 5032  | 1804 | 521  | 612  | 222 | 105 | 3180 | 1988 | 606  | 2339 | 1606 | 1945 |
| 2105 | 3956  | 1149 | 861  | 6289 | 254 | 945 | 870  | 550  | 310  | 936  | 246  | 158  |
| 2106 | 13386 | 5111 | 2111 | 98   | 47  | 32  | 302  | 150  | 28   | 214  | 17   | 86   |
| 2107 | 119   | 25   | 34   | 1896 | 260 | 348 | 192  | 35   | 148  | 230  | 96   | 93   |
| 2210 | 154   | 45   | 50   | 642  | 485 | 808 | 899  | 611  | 2551 | 1712 | 1184 | 322  |
